# Supplementary material for: Cross-Talks between RKIP and YY1 through a Multilevel Bioinformatics Pan-Cancer Analysis
Source: Preprints.org preprint supplement (doi:10.20944/preprints202309.0467.v1), 2023-09-07
Supplement: Supplementary file 3 [file Table S10.xlsx]

## Sheet: Table S10
cancertype	symbol	cell_type	cor	p_value	fdr	entrez
ACC	PEBP1	Bcell	-0.0653463	0.56721	0.748409	5037
ACC	PEBP1	CD4_T	0.0726224	0.524754	0.865454	5037
ACC	PEBP1	CD4_naive	-0.0274989	0.809892	0.911141	5037
ACC	PEBP1	CD8_T	-0.0517433	0.650637	0.79397	5037
ACC	PEBP1	CD8_naive	-0.0625221	0.584113	0.759543	5037
ACC	PEBP1	Central_memory	-0.0979733	0.390343	0.996844	5037
ACC	PEBP1	Cytotoxic	0.0266563	0.815613	0.904998	5037
ACC	PEBP1	DC	0.141569	0.213308	0.477661	5037
ACC	PEBP1	Effector_memory	-0.185769	0.101185	0.552091	5037
ACC	PEBP1	Exhausted	-0.00908584	0.936658	0.973247	5037
ACC	PEBP1	Gamma_delta	-0.0788892	0.489512	0.749209	5037
ACC	PEBP1	InfiltrationScore	0.0588185	0.60662	0.774805	5037
ACC	PEBP1	MAIT	-0.020498	0.857698	0.936551	5037
ACC	PEBP1	Macrophage	0.0664094	0.560907	0.772618	5037
ACC	PEBP1	Monocyte	0.142839	0.209191	0.997715	5037
ACC	PEBP1	NK	0.0101025	0.929587	0.968793	5037
ACC	PEBP1	NKT	0.17457	0.123871	0.380268	5037
ACC	PEBP1	Neutrophil	0.0531115	0.642025	0.785542	5037
ACC	PEBP1	Tfh	-0.0887229	0.436833	0.65408	5037
ACC	PEBP1	Th1	0.0194145	0.865147	0.926497	5037
ACC	PEBP1	Th17	0.204177	0.0710904	0.292846	5037
ACC	PEBP1	Th2	-0.108939	0.339231	0.555662	5037
ACC	PEBP1	Tr1	0.0496256	0.664056	0.905049	5037
ACC	PEBP1	iTreg	0.0627325	0.582846	0.748025	5037
ACC	PEBP1	nTreg	-0.0320017	0.779496	0.908408	5037
ACC	YY1	Bcell	0.0122463	0.914696	0.961443	7528
ACC	YY1	CD4_T	-0.000973817	0.993204	0.998416	7528
ACC	YY1	CD4_naive	0.110112	0.334023	0.573408	7528
ACC	YY1	CD8_T	-0.0020449	0.98573	0.993127	7528
ACC	YY1	CD8_naive	0.0942092	0.408894	0.626552	7528
ACC	YY1	Central_memory	-0.0287911	0.801138	0.997418	7528
ACC	YY1	Cytotoxic	0.00576944	0.959753	0.980749	7528
ACC	YY1	DC	-0.156846	0.167457	0.422985	7528
ACC	YY1	Effector_memory	-0.122425	0.282446	0.751164	7528
ACC	YY1	Exhausted	-0.0561437	0.623108	0.804848	7528
ACC	YY1	Gamma_delta	0.107182	0.347123	0.638521	7528
ACC	YY1	InfiltrationScore	-0.0455503	0.690178	0.833054	7528
ACC	YY1	MAIT	-0.0271927	0.81197	0.915819	7528
ACC	YY1	Macrophage	-0.0743698	0.514801	0.743907	7528
ACC	YY1	Monocyte	0.17119	0.131433	0.997715	7528
ACC	YY1	NK	-0.0410431	0.719493	0.852468	7528
ACC	YY1	NKT	-0.042257	0.711556	0.877861	7528
ACC	YY1	Neutrophil	0.121671	0.285444	0.469522	7528
ACC	YY1	Tfh	-0.1042	0.360782	0.584393	7528
ACC	YY1	Th1	-0.0768426	0.500883	0.678482	7528
ACC	YY1	Th17	0.258504	0.0214334	0.160942	7528
ACC	YY1	Th2	-0.105429	0.355114	0.571036	7528
ACC	YY1	Tr1	0.0892724	0.433987	0.808714	7528
ACC	YY1	iTreg	-0.199577	0.077834	0.212569	7528
ACC	YY1	nTreg	-0.252674	0.0246652	0.187407	7528
BLCA	PEBP1	Bcell	-0.0503442	0.309784	0.625139	5037
BLCA	PEBP1	CD4_T	-0.00168507	0.972898	0.987009	5037
BLCA	PEBP1	CD4_naive	-0.0697111	0.159363	0.255331	5037
BLCA	PEBP1	CD8_T	0.0338024	0.495419	0.682532	5037
BLCA	PEBP1	CD8_naive	-0.0669251	0.176744	0.255976	5037
BLCA	PEBP1	Central_memory	0.0191124	0.699958	0.794325	5037
BLCA	PEBP1	Cytotoxic	0.0989012	0.0456155	0.0747585	5037
BLCA	PEBP1	DC	0.0323515	0.514119	0.664237	5037
BLCA	PEBP1	Effector_memory	-0.0063939	0.897426	0.966548	5037
BLCA	PEBP1	Exhausted	0.00566725	0.909029	0.936771	5037
BLCA	PEBP1	Gamma_delta	-0.0455495	0.35818	0.684397	5037
BLCA	PEBP1	InfiltrationScore	0.057273	0.247813	0.326354	5037
BLCA	PEBP1	MAIT	0.012417	0.802309	0.91161	5037
BLCA	PEBP1	Macrophage	0.0554481	0.263226	0.354661	5037
BLCA	PEBP1	Monocyte	-0.0530235	0.284708	0.506677	5037
BLCA	PEBP1	NK	0.0436685	0.378395	0.467675	5037
BLCA	PEBP1	NKT	0.0540688	0.275306	0.386715	5037
BLCA	PEBP1	Neutrophil	-0.0272133	0.583162	0.670169	5037
BLCA	PEBP1	Tfh	0.0128277	0.795912	0.864262	5037
BLCA	PEBP1	Th1	0.0490227	0.322672	0.424069	5037
BLCA	PEBP1	Th17	-0.0424054	0.392354	0.548173	5037
BLCA	PEBP1	Th2	0.089784	0.0696966	0.117014	5037
BLCA	PEBP1	Tr1	0.103938	0.0356174	0.0825198	5037
BLCA	PEBP1	iTreg	0.119847	0.0153047	0.0309146	5037
BLCA	PEBP1	nTreg	0.0760437	0.124684	0.359822	5037
BLCA	YY1	Bcell	-0.0324825	0.512416	0.780097	7528
BLCA	YY1	CD4_T	-0.00174768	0.971891	0.986561	7528
BLCA	YY1	CD4_naive	0.0527546	0.287161	0.409861	7528
BLCA	YY1	CD8_T	-0.0321583	0.516636	0.701331	7528
BLCA	YY1	CD8_naive	0.0743626	0.13326	0.201069	7528
BLCA	YY1	Central_memory	0.0905406	0.0673658	0.147737	7528
BLCA	YY1	Cytotoxic	-0.0498393	0.314667	0.407458	7528
BLCA	YY1	DC	0.0063832	0.897596	0.939089	7528
BLCA	YY1	Effector_memory	-0.0383911	0.438741	0.728893	7528
BLCA	YY1	Exhausted	-0.0359099	0.468916	0.578662	7528
BLCA	YY1	Gamma_delta	0.00856182	0.862946	0.957236	7528
BLCA	YY1	InfiltrationScore	-0.015891	0.748655	0.808639	7528
BLCA	YY1	MAIT	-0.0817514	0.0987337	0.319519	7528
BLCA	YY1	Macrophage	-0.00439919	0.929323	0.950207	7528
BLCA	YY1	Monocyte	0.0491729	0.321189	0.543848	7528
BLCA	YY1	NK	-0.0563142	0.255831	0.337538	7528
BLCA	YY1	NKT	-0.0665679	0.17907	0.27408	7528
BLCA	YY1	Neutrophil	0.0508759	0.304695	0.394545	7528
BLCA	YY1	Tfh	-0.0491559	0.321357	0.442377	7528
BLCA	YY1	Th1	-0.105249	0.0333429	0.0602608	7528
BLCA	YY1	Th17	0.0239414	0.629258	0.753015	7528
BLCA	YY1	Th2	0.00502345	0.919326	0.944575	7528
BLCA	YY1	Tr1	0.10094	0.0413164	0.0935708	7528
BLCA	YY1	iTreg	0.0280054	0.572242	0.674259	7528
BLCA	YY1	nTreg	0.010618	0.830481	0.927678	7528
BRCA	PEBP1	Bcell	0.120539	0.0015133	0.00372139	5037
BRCA	PEBP1	CD4_T	0.023889	0.53101	0.60067	5037
BRCA	PEBP1	CD4_naive	0.0311848	0.41343	0.711653	5037
BRCA	PEBP1	CD8_T	-0.00349165	0.927054	0.949776	5037
BRCA	PEBP1	CD8_naive	-0.0222418	0.55972	0.634936	5037
BRCA	PEBP1	Central_memory	0.0659246	0.0835516	0.146298	5037
BRCA	PEBP1	Cytotoxic	0.0347291	0.362358	0.452633	5037
BRCA	PEBP1	DC	0.0763091	0.0450953	0.12347	5037
BRCA	PEBP1	Effector_memory	-0.00708836	0.852554	0.902424	5037
BRCA	PEBP1	Exhausted	0.0489994	0.198601	0.281783	5037
BRCA	PEBP1	Gamma_delta	-0.0825814	0.0300821	0.0714414	5037
BRCA	PEBP1	InfiltrationScore	0.0674507	0.0766289	0.116869	5037
BRCA	PEBP1	MAIT	0.0212109	0.578063	0.759965	5037
BRCA	PEBP1	Macrophage	0.0233276	0.54071	0.73856	5037
BRCA	PEBP1	Monocyte	0.0024996	0.947744	0.970355	5037
BRCA	PEBP1	NK	0.0288054	0.449984	0.52519	5037
BRCA	PEBP1	NKT	-0.0593856	0.11912	0.187573	5037
BRCA	PEBP1	Neutrophil	-0.064816	0.0888907	0.131204	5037
BRCA	PEBP1	Tfh	0.0454465	0.23317	0.30233	5037
BRCA	PEBP1	Th1	0.0844947	0.0264569	0.0500466	5037
BRCA	PEBP1	Th17	-0.0576274	0.130468	0.195611	5037
BRCA	PEBP1	Th2	0.021099	0.580071	0.718296	5037
BRCA	PEBP1	Tr1	0.0362745	0.341382	0.555917	5037
BRCA	PEBP1	iTreg	0.110142	0.00377036	0.00922054	5037
BRCA	PEBP1	nTreg	0.0261163	0.493412	0.680877	5037
BRCA	YY1	Bcell	0.00150211	0.968583	0.978658	7528
BRCA	YY1	CD4_T	-0.0666669	0.0801236	0.117547	7528
BRCA	YY1	CD4_naive	0.0403427	0.289953	0.607737	7528
BRCA	YY1	CD8_T	-0.0571699	0.133554	0.207258	7528
BRCA	YY1	CD8_naive	0.0383626	0.314297	0.395287	7528
BRCA	YY1	Central_memory	0.157608	3.2031e-05	0.000124987	7528
BRCA	YY1	Cytotoxic	-0.038535	0.312126	0.399335	7528
BRCA	YY1	DC	0.0299838	0.431657	0.603034	7528
BRCA	YY1	Effector_memory	-0.0123424	0.746216	0.828351	7528
BRCA	YY1	Exhausted	-0.0443926	0.244198	0.33577	7528
BRCA	YY1	Gamma_delta	-0.0202493	0.595422	0.70676	7528
BRCA	YY1	InfiltrationScore	-0.125295	0.000972854	0.00219185	7528
BRCA	YY1	MAIT	0.0193613	0.61166	0.782945	7528
BRCA	YY1	Macrophage	-0.0482972	0.205119	0.429312	7528
BRCA	YY1	Monocyte	-0.0839593	0.0274312	0.0680576	7528
BRCA	YY1	NK	-0.0859988	0.0238775	0.0386967	7528
BRCA	YY1	NKT	-0.131773	0.000519941	0.00183066	7528
BRCA	YY1	Neutrophil	0.0208317	0.584879	0.659015	7528
BRCA	YY1	Tfh	-0.0468479	0.219058	0.286051	7528
BRCA	YY1	Th1	-0.0111582	0.769843	0.836475	7528
BRCA	YY1	Th17	0.0291743	0.444201	0.545899	7528
BRCA	YY1	Th2	0.00835612	0.82657	0.895455	7528
BRCA	YY1	Tr1	0.0942072	0.0132997	0.0583761	7528
BRCA	YY1	iTreg	0.0834175	0.0284485	0.0552116	7528
BRCA	YY1	nTreg	0.140363	0.00021672	0.00413396	7528
CESC	PEBP1	Bcell	0.0395606	0.487686	0.705443	5037
CESC	PEBP1	CD4_T	-0.027739	0.626602	0.757286	5037
CESC	PEBP1	CD4_naive	0.0347519	0.542138	0.839892	5037
CESC	PEBP1	CD8_T	-0.13032	0.0217301	0.0836294	5037
CESC	PEBP1	CD8_naive	-0.00950682	0.867596	0.932896	5037
CESC	PEBP1	Central_memory	0.044338	0.43664	0.616735	5037
CESC	PEBP1	Cytotoxic	-0.115367	0.0423741	0.118272	5037
CESC	PEBP1	DC	0.0496986	0.383187	0.534459	5037
CESC	PEBP1	Effector_memory	-0.0133756	0.81455	0.907565	5037
CESC	PEBP1	Exhausted	-0.0547044	0.337056	0.575583	5037
CESC	PEBP1	Gamma_delta	-0.129275	0.0228166	0.219695	5037
CESC	PEBP1	InfiltrationScore	-0.0408493	0.473608	0.634218	5037
CESC	PEBP1	MAIT	0.0511904	0.369053	0.660863	5037
CESC	PEBP1	Macrophage	-0.0285143	0.616991	0.740966	5037
CESC	PEBP1	Monocyte	0.0323935	0.569904	0.769431	5037
CESC	PEBP1	NK	-0.0703415	0.216824	0.422364	5037
CESC	PEBP1	NKT	0.0638044	0.262716	0.531509	5037
CESC	PEBP1	Neutrophil	0.10135	0.0747759	0.19448	5037
CESC	PEBP1	Tfh	-0.0358532	0.529407	0.703595	5037
CESC	PEBP1	Th1	-0.0590858	0.299728	0.531974	5037
CESC	PEBP1	Th17	0.0147614	0.795739	0.88662	5037
CESC	PEBP1	Th2	-0.0352399	0.536478	0.795053	5037
CESC	PEBP1	Tr1	0.00665048	0.90716	0.940129	5037
CESC	PEBP1	iTreg	-0.0868891	0.126873	0.303373	5037
CESC	PEBP1	nTreg	-0.0267252	0.639263	0.848476	5037
CESC	YY1	Bcell	-0.0317894	0.577124	0.769796	7528
CESC	YY1	CD4_T	-0.0178113	0.754768	0.851887	7528
CESC	YY1	CD4_naive	-0.0266044	0.64078	0.881663	7528
CESC	YY1	CD8_T	-0.0650345	0.253606	0.488662	7528
CESC	YY1	CD8_naive	-0.010224	0.857711	0.927777	7528
CESC	YY1	Central_memory	-0.0142249	0.803008	0.890409	7528
CESC	YY1	Cytotoxic	-0.0514578	0.366554	0.57182	7528
CESC	YY1	DC	0.0138801	0.807689	0.878785	7528
CESC	YY1	Effector_memory	-0.0473934	0.405667	0.62784	7528
CESC	YY1	Exhausted	-0.0359443	0.52836	0.739285	7528
CESC	YY1	Gamma_delta	0.0296833	0.602623	0.846888	7528
CESC	YY1	InfiltrationScore	-0.0485807	0.393993	0.561732	7528
CESC	YY1	MAIT	0.0403984	0.478508	0.74198	7528
CESC	YY1	Macrophage	-0.00897097	0.874996	0.921205	7528
CESC	YY1	Monocyte	-0.0123977	0.827889	0.920942	7528
CESC	YY1	NK	-0.024167	0.671677	0.828982	7528
CESC	YY1	NKT	0.0380419	0.50456	0.74272	7528
CESC	YY1	Neutrophil	0.0177499	0.755587	0.876353	7528
CESC	YY1	Tfh	-0.00379498	0.946942	0.972665	7528
CESC	YY1	Th1	-0.0673842	0.23682	0.459751	7528
CESC	YY1	Th17	-0.0135449	0.812246	0.895243	7528
CESC	YY1	Th2	0.0833946	0.142939	0.442145	7528
CESC	YY1	Tr1	-0.109343	0.0544582	0.121786	7528
CESC	YY1	iTreg	-0.0626684	0.271326	0.49605	7528
CESC	YY1	nTreg	-0.0287885	0.613607	0.837976	7528
CHOL	PEBP1	Bcell	0.30488	0.0706006	0.294073	5037
CHOL	PEBP1	CD4_T	0.139334	0.417672	0.789737	5037
CHOL	PEBP1	CD4_naive	-0.0986767	0.566939	0.837593	5037
CHOL	PEBP1	CD8_T	-0.236226	0.165425	0.598154	5037
CHOL	PEBP1	CD8_naive	-0.0243636	0.887836	0.999727	5037
CHOL	PEBP1	Central_memory	0.062552	0.717037	0.941056	5037
CHOL	PEBP1	Cytotoxic	-0.0338503	0.844618	0.958827	5037
CHOL	PEBP1	DC	0.133213	0.438616	0.999686	5037
CHOL	PEBP1	Effector_memory	0.00432836	0.980012	0.994691	5037
CHOL	PEBP1	Exhausted	-0.0705332	0.682706	0.998541	5037
CHOL	PEBP1	Gamma_delta	-0.33422	0.0463432	0.904997	5037
CHOL	PEBP1	InfiltrationScore	0.181491	0.289444	0.589741	5037
CHOL	PEBP1	MAIT	0.061168	0.723048	0.999553	5037
CHOL	PEBP1	Macrophage	0.223452	0.190184	0.999537	5037
CHOL	PEBP1	Monocyte	0.030898	0.858026	0.994567	5037
CHOL	PEBP1	NK	0.028062	0.870942	0.968073	5037
CHOL	PEBP1	NKT	0.0028472	0.986851	0.995513	5037
CHOL	PEBP1	Neutrophil	0.0812569	0.637558	0.882362	5037
CHOL	PEBP1	Tfh	-0.0252855	0.88362	0.954435	5037
CHOL	PEBP1	Th1	-0.106442	0.53666	0.839593	5037
CHOL	PEBP1	Th17	0.0911373	0.597064	0.925495	5037
CHOL	PEBP1	Th2	0.0381075	0.825361	0.999758	5037
CHOL	PEBP1	Tr1	0.258177	0.128436	0.342452	5037
CHOL	PEBP1	iTreg	0.00232938	0.989242	0.999144	5037
CHOL	PEBP1	nTreg	0.120623	0.483452	0.999274	5037
CHOL	YY1	Bcell	0.25647	0.13107	0.371377	7528
CHOL	YY1	CD4_T	0.345631	0.0389498	0.313237	7528
CHOL	YY1	CD4_naive	-0.146624	0.393482	0.742153	7528
CHOL	YY1	CD8_T	0.0159629	0.926378	0.98666	7528
CHOL	YY1	CD8_naive	-0.0813407	0.63721	0.999727	7528
CHOL	YY1	Central_memory	0.23775	0.162633	0.548964	7528
CHOL	YY1	Cytotoxic	0.121887	0.478847	0.803686	7528
CHOL	YY1	DC	-0.0377116	0.827147	0.999686	7528
CHOL	YY1	Effector_memory	-0.21209	0.214305	0.582845	7528
CHOL	YY1	Exhausted	-0.157477	0.359008	0.998541	7528
CHOL	YY1	Gamma_delta	-0.215701	0.20642	0.958767	7528
CHOL	YY1	InfiltrationScore	0.0038615	0.982168	0.99173	7528
CHOL	YY1	MAIT	0.0673492	0.696331	0.999553	7528
CHOL	YY1	Macrophage	-0.0827648	0.631307	0.999537	7528
CHOL	YY1	Monocyte	-0.0970711	0.573295	0.937818	7528
CHOL	YY1	NK	0.0231705	0.893296	0.972957	7528
CHOL	YY1	NKT	-0.00724743	0.966538	0.989177	7528
CHOL	YY1	Neutrophil	-0.163286	0.341326	0.704848	7528
CHOL	YY1	Tfh	0.188351	0.271286	0.603966	7528
CHOL	YY1	Th1	-0.00656413	0.969692	0.990017	7528
CHOL	YY1	Th17	0.0307653	0.858629	0.975906	7528
CHOL	YY1	Th2	-0.00321854	0.985136	0.999758	7528
CHOL	YY1	Tr1	0.467036	0.0040834	0.0588597	7528
CHOL	YY1	iTreg	0.271243	0.109557	0.573373	7528
CHOL	YY1	nTreg	0.140834	0.412627	0.999274	7528
COAD	PEBP1	Bcell	0.0369566	0.543168	0.808521	5037
COAD	PEBP1	CD4_T	0.114793	0.0581917	0.128311	5037
COAD	PEBP1	CD4_naive	-0.0891505	0.141785	0.409614	5037
COAD	PEBP1	CD8_T	0.0869821	0.151771	0.269692	5037
COAD	PEBP1	CD8_naive	-0.0242529	0.689934	0.819923	5037
COAD	PEBP1	Central_memory	0.0509012	0.402194	0.624789	5037
COAD	PEBP1	Cytotoxic	0.194268	0.00125577	0.00351686	5037
COAD	PEBP1	DC	0.00783209	0.897504	0.946591	5037
COAD	PEBP1	Effector_memory	-0.10919	0.0716671	0.22296	5037
COAD	PEBP1	Exhausted	0.105561	0.0816804	0.157017	5037
COAD	PEBP1	Gamma_delta	-0.00914323	0.880464	0.976148	5037
COAD	PEBP1	InfiltrationScore	0.113789	0.0604391	0.109942	5037
COAD	PEBP1	MAIT	0.123731	0.0410683	0.204117	5037
COAD	PEBP1	Macrophage	0.0433938	0.475209	0.605486	5037
COAD	PEBP1	Monocyte	-0.123947	0.0407123	0.26072	5037
COAD	PEBP1	NK	0.163686	0.00671972	0.0164629	5037
COAD	PEBP1	NKT	0.0368574	0.544252	0.749293	5037
COAD	PEBP1	Neutrophil	-0.219354	0.000259936	0.000744821	5037
COAD	PEBP1	Tfh	0.118315	0.0508449	0.12494	5037
COAD	PEBP1	Th1	0.10569	0.0813049	0.186296	5037
COAD	PEBP1	Th17	-0.111879	0.0649112	0.233781	5037
COAD	PEBP1	Th2	0.162716	0.00705682	0.0201702	5037
COAD	PEBP1	Tr1	0.0968592	0.110313	0.218677	5037
COAD	PEBP1	iTreg	0.182776	0.00243198	0.00831496	5037
COAD	PEBP1	nTreg	-0.0282359	0.6423	0.798858	5037
COAD	YY1	Bcell	-0.0095166	0.875621	0.958176	7528
COAD	YY1	CD4_T	-0.025219	0.678259	0.800572	7528
COAD	YY1	CD4_naive	0.102268	0.0917143	0.331912	7528
COAD	YY1	CD8_T	-0.0953401	0.116036	0.219261	7528
COAD	YY1	CD8_naive	0.0187744	0.757467	0.864349	7528
COAD	YY1	Central_memory	0.0319923	0.598673	0.783505	7528
COAD	YY1	Cytotoxic	-0.0912972	0.132401	0.207757	7528
COAD	YY1	DC	0.0025872	0.966059	0.982567	7528
COAD	YY1	Effector_memory	-0.0321505	0.596865	0.79667	7528
COAD	YY1	Exhausted	-0.0661041	0.276419	0.397616	7528
COAD	YY1	Gamma_delta	0.0136804	0.821971	0.962844	7528
COAD	YY1	InfiltrationScore	-0.0580553	0.339256	0.446689	7528
COAD	YY1	MAIT	-0.0391775	0.519189	0.76928	7528
COAD	YY1	Macrophage	-0.00265558	0.965163	0.976459	7528
COAD	YY1	Monocyte	0.0495059	0.415234	0.74242	7528
COAD	YY1	NK	-0.0914774	0.131636	0.21114	7528
COAD	YY1	NKT	-0.061037	0.31499	0.548644	7528
COAD	YY1	Neutrophil	0.0256444	0.673142	0.750414	7528
COAD	YY1	Tfh	-0.000212933	0.997206	0.998541	7528
COAD	YY1	Th1	-0.0333304	0.583462	0.73091	7528
COAD	YY1	Th17	0.0560948	0.355844	0.632975	7528
COAD	YY1	Th2	-0.108268	0.0741112	0.14957	7528
COAD	YY1	Tr1	-0.0398585	0.511947	0.644844	7528
COAD	YY1	iTreg	-0.0702163	0.247571	0.356776	7528
COAD	YY1	nTreg	-0.0787544	0.194534	0.386618	7528
DLBC	PEBP1	Bcell	0.213121	0.145838	0.362377	5037
DLBC	PEBP1	CD4_T	-0.250461	0.0859805	0.275038	5037
DLBC	PEBP1	CD4_naive	-0.160154	0.276874	0.740011	5037
DLBC	PEBP1	CD8_T	0.1906	0.19441	0.343261	5037
DLBC	PEBP1	CD8_naive	-0.109841	0.457363	0.911472	5037
DLBC	PEBP1	Central_memory	-0.408914	0.00390545	0.0261886	5037
DLBC	PEBP1	Cytotoxic	0.103399	0.484326	0.792667	5037
DLBC	PEBP1	DC	0.104169	0.481059	0.843278	5037
DLBC	PEBP1	Effector_memory	0.289215	0.0461785	0.17732	5037
DLBC	PEBP1	Exhausted	0.124306	0.399907	0.926153	5037
DLBC	PEBP1	Gamma_delta	0.278036	0.0556933	0.482861	5037
DLBC	PEBP1	InfiltrationScore	0.3328	0.0208196	0.142931	5037
DLBC	PEBP1	MAIT	0.15646	0.288248	0.482475	5037
DLBC	PEBP1	Macrophage	0.0933098	0.528167	0.999089	5037
DLBC	PEBP1	Monocyte	0.0842654	0.569062	0.957113	5037
DLBC	PEBP1	NK	0.312704	0.0304676	0.169565	5037
DLBC	PEBP1	NKT	0.0717083	0.628146	0.999823	5037
DLBC	PEBP1	Neutrophil	-0.147123	0.318342	0.601197	5037
DLBC	PEBP1	Tfh	0.09469	0.522056	0.747015	5037
DLBC	PEBP1	Th1	0.368765	0.00990467	0.108383	5037
DLBC	PEBP1	Th17	-0.445669	0.00150106	0.044155	5037
DLBC	PEBP1	Th2	0.296764	0.0405365	0.149968	5037
DLBC	PEBP1	Tr1	-0.143408	0.330847	0.890146	5037
DLBC	PEBP1	iTreg	-0.240886	0.099086	0.248526	5037
DLBC	PEBP1	nTreg	-0.128899	0.382581	0.831662	5037
DLBC	YY1	Bcell	0.117146	0.427806	0.67245	7528
DLBC	YY1	CD4_T	-0.171805	0.242955	0.479673	7528
DLBC	YY1	CD4_naive	-0.0474581	0.748731	0.944107	7528
DLBC	YY1	CD8_T	0.416388	0.00324263	0.0263088	7528
DLBC	YY1	CD8_naive	-0.185693	0.206363	0.902321	7528
DLBC	YY1	Central_memory	-0.363691	0.0110543	0.0479563	7528
DLBC	YY1	Cytotoxic	0.190514	0.194615	0.601525	7528
DLBC	YY1	DC	0.216046	0.140257	0.618859	7528
DLBC	YY1	Effector_memory	0.214342	0.143488	0.352391	7528
DLBC	YY1	Exhausted	0.272474	0.0609832	0.823016	7528
DLBC	YY1	Gamma_delta	0.271086	0.062364	0.493159	7528
DLBC	YY1	InfiltrationScore	0.38149	0.00746441	0.0846912	7528
DLBC	YY1	MAIT	0.293648	0.0427926	0.151083	7528
DLBC	YY1	Macrophage	0.0788709	0.59413	0.999089	7528
DLBC	YY1	Monocyte	0.0745466	0.614569	0.964365	7528
DLBC	YY1	NK	0.441477	0.00168312	0.040516	7528
DLBC	YY1	NKT	0.0615963	0.677485	0.999823	7528
DLBC	YY1	Neutrophil	-0.317752	0.0277495	0.383375	7528
DLBC	YY1	Tfh	0.165002	0.262401	0.529635	7528
DLBC	YY1	Th1	0.179631	0.221827	0.490012	7528
DLBC	YY1	Th17	-0.30978	0.03214	0.156974	7528
DLBC	YY1	Th2	0.255427	0.0797395	0.224672	7528
DLBC	YY1	Tr1	-0.241078	0.0988089	0.795243	7528
DLBC	YY1	iTreg	-0.471642	0.00071447	0.0197925	7528
DLBC	YY1	nTreg	-0.136664	0.354326	0.825903	7528
ESCA	PEBP1	Bcell	-0.035524	0.629324	0.78391	5037
ESCA	PEBP1	CD4_T	0.00579486	0.937261	0.964386	5037
ESCA	PEBP1	CD4_naive	0.0801403	0.275577	0.597957	5037
ESCA	PEBP1	CD8_T	-0.0535155	0.466964	0.836111	5037
ESCA	PEBP1	CD8_naive	-0.0210697	0.774707	0.89038	5037
ESCA	PEBP1	Central_memory	-0.0278909	0.704748	0.815104	5037
ESCA	PEBP1	Cytotoxic	0.074233	0.312635	0.542582	5037
ESCA	PEBP1	DC	0.135641	0.0641705	0.137537	5037
ESCA	PEBP1	Effector_memory	-0.00150587	0.983681	0.996954	5037
ESCA	PEBP1	Exhausted	0.0765702	0.297602	0.601892	5037
ESCA	PEBP1	Gamma_delta	0.0696008	0.343871	0.550923	5037
ESCA	PEBP1	InfiltrationScore	0.0993461	0.176127	0.340025	5037
ESCA	PEBP1	MAIT	-0.110332	0.132775	0.288388	5037
ESCA	PEBP1	Macrophage	0.17038	0.0197343	0.0657178	5037
ESCA	PEBP1	Monocyte	0.155646	0.0334091	0.196958	5037
ESCA	PEBP1	NK	-0.0483158	0.511398	0.702237	5037
ESCA	PEBP1	NKT	-0.0117916	0.872746	0.962733	5037
ESCA	PEBP1	Neutrophil	-0.0990545	0.177405	0.338069	5037
ESCA	PEBP1	Tfh	-0.0358441	0.626237	0.778031	5037
ESCA	PEBP1	Th1	0.0859291	0.242263	0.572957	5037
ESCA	PEBP1	Th17	-0.0474852	0.518694	0.698218	5037
ESCA	PEBP1	Th2	0.0595986	0.417794	0.626023	5037
ESCA	PEBP1	Tr1	0.0496713	0.499607	0.695905	5037
ESCA	PEBP1	iTreg	0.0913528	0.2137	0.520895	5037
ESCA	PEBP1	nTreg	-0.0698839	0.341908	0.482402	5037
ESCA	YY1	Bcell	0.0497485	0.498941	0.68589	7528
ESCA	YY1	CD4_T	0.0282723	0.700903	0.804809	7528
ESCA	YY1	CD4_naive	-0.0543324	0.460181	0.704504	7528
ESCA	YY1	CD8_T	0.0271532	0.712207	0.931888	7528
ESCA	YY1	CD8_naive	-0.0866831	0.23814	0.489652	7528
ESCA	YY1	Central_memory	0.0487085	0.507968	0.660094	7528
ESCA	YY1	Cytotoxic	0.0132788	0.856858	0.93351	7528
ESCA	YY1	DC	0.0918523	0.211196	0.341719	7528
ESCA	YY1	Effector_memory	-0.0302838	0.680748	0.916531	7528
ESCA	YY1	Exhausted	0.0705737	0.337152	0.637312	7528
ESCA	YY1	Gamma_delta	0.139313	0.0572258	0.175042	7528
ESCA	YY1	InfiltrationScore	0.123417	0.0924099	0.210973	7528
ESCA	YY1	MAIT	-0.150386	0.0399358	0.127042	7528
ESCA	YY1	Macrophage	0.156875	0.0320216	0.0947918	7528
ESCA	YY1	Monocyte	0.0516516	0.482643	0.743814	7528
ESCA	YY1	NK	0.0251342	0.732761	0.853718	7528
ESCA	YY1	NKT	0.00948961	0.897436	0.970207	7528
ESCA	YY1	Neutrophil	-0.130374	0.075325	0.177157	7528
ESCA	YY1	Tfh	-0.0311454	0.672183	0.80955	7528
ESCA	YY1	Th1	0.00977944	0.894321	0.964195	7528
ESCA	YY1	Th17	-0.107084	0.144639	0.302602	7528
ESCA	YY1	Th2	0.0642314	0.382465	0.593964	7528
ESCA	YY1	Tr1	0.0476176	0.517527	0.708174	7528
ESCA	YY1	iTreg	0.0873447	0.234564	0.544991	7528
ESCA	YY1	nTreg	-0.0805882	0.272894	0.40894	7528
GBM	PEBP1	Bcell	-0.178832	0.103607	0.286581	5037
GBM	PEBP1	CD4_T	0.0307898	0.780989	0.912126	5037
GBM	PEBP1	CD4_naive	-0.0973372	0.378406	0.677212	5037
GBM	PEBP1	CD8_T	0.0408467	0.712194	0.893395	5037
GBM	PEBP1	CD8_naive	-0.0879066	0.426529	0.622301	5037
GBM	PEBP1	Central_memory	0.017187	0.876685	0.947403	5037
GBM	PEBP1	Cytotoxic	0.0267964	0.808814	0.889857	5037
GBM	PEBP1	DC	0.220511	0.0438403	0.197798	5037
GBM	PEBP1	Effector_memory	-0.0203304	0.85436	0.967277	5037
GBM	PEBP1	Exhausted	-0.0463666	0.675352	0.897712	5037
GBM	PEBP1	Gamma_delta	-0.196738	0.0728623	0.237636	5037
GBM	PEBP1	InfiltrationScore	0.203439	0.0634432	0.17463	5037
GBM	PEBP1	MAIT	-0.127459	0.247927	0.568708	5037
GBM	PEBP1	Macrophage	0.256813	0.0183658	0.0695184	5037
GBM	PEBP1	Monocyte	0.155176	0.158701	0.518784	5037
GBM	PEBP1	NK	0.137012	0.213947	0.487415	5037
GBM	PEBP1	NKT	0.159565	0.147105	0.46431	5037
GBM	PEBP1	Neutrophil	-0.0126757	0.90889	0.959043	5037
GBM	PEBP1	Tfh	0.179625	0.10206	0.338828	5037
GBM	PEBP1	Th1	0.103274	0.34987	0.786991	5037
GBM	PEBP1	Th17	0.0806126	0.466036	0.726665	5037
GBM	PEBP1	Th2	-0.022239	0.840859	0.95988	5037
GBM	PEBP1	Tr1	0.0168321	0.879212	0.957069	5037
GBM	PEBP1	iTreg	0.0246042	0.824193	0.94426	5037
GBM	PEBP1	nTreg	0.0879639	0.426226	0.645456	5037
GBM	YY1	Bcell	-0.0538501	0.626611	0.806319	7528
GBM	YY1	CD4_T	-0.249408	0.0221439	0.27464	7528
GBM	YY1	CD4_naive	-0.0973372	0.378406	0.677212	7528
GBM	YY1	CD8_T	0.223902	0.0406166	0.288035	7528
GBM	YY1	CD8_naive	-0.0211674	0.848434	0.918095	7528
GBM	YY1	Central_memory	0.0875551	0.428387	0.68759	7528
GBM	YY1	Cytotoxic	0.167159	0.128563	0.28434	7528
GBM	YY1	DC	0.134719	0.221785	0.491346	7528
GBM	YY1	Effector_memory	0.00813217	0.941474	0.988397	7528
GBM	YY1	Exhausted	-0.0613619	0.579245	0.859986	7528
GBM	YY1	Gamma_delta	-0.226001	0.0387224	0.166424	7528
GBM	YY1	InfiltrationScore	0.106798	0.333582	0.526495	7528
GBM	YY1	MAIT	0.0276389	0.802922	0.931169	7528
GBM	YY1	Macrophage	0.0704643	0.524169	0.698824	7528
GBM	YY1	Monocyte	0.0299677	0.786695	0.922839	7528
GBM	YY1	NK	0.0575532	0.603056	0.803623	7528
GBM	YY1	NKT	0.131966	0.231461	0.554445	7528
GBM	YY1	Neutrophil	-0.0613327	0.579426	0.780615	7528
GBM	YY1	Tfh	-0.0030517	0.978021	0.991756	7528
GBM	YY1	Th1	0.0318389	0.773722	0.957183	7528
GBM	YY1	Th17	0.140087	0.203744	0.507041	7528
GBM	YY1	Th2	0.106992	0.332699	0.741503	7528
GBM	YY1	Tr1	-0.144653	0.189245	0.489145	7528
GBM	YY1	iTreg	-0.0225479	0.838678	0.947614	7528
GBM	YY1	nTreg	-0.0417967	0.705804	0.841267	7528
HNSC	PEBP1	Bcell	-0.0421093	0.335099	0.47954	5037
HNSC	PEBP1	CD4_T	-0.033996	0.436536	0.568367	5037
HNSC	PEBP1	CD4_naive	-0.00626655	0.885989	0.919694	5037
HNSC	PEBP1	CD8_T	-0.125457	0.00395332	0.010885	5037
HNSC	PEBP1	CD8_naive	0.0723895	0.0972251	0.170407	5037
HNSC	PEBP1	Central_memory	0.0388865	0.373431	0.463333	5037
HNSC	PEBP1	Cytotoxic	-0.0795712	0.0682291	0.10638	5037
HNSC	PEBP1	DC	0.0492221	0.259789	0.407436	5037
HNSC	PEBP1	Effector_memory	-0.0680572	0.119004	0.197301	5037
HNSC	PEBP1	Exhausted	-0.0598008	0.170851	0.249663	5037
HNSC	PEBP1	Gamma_delta	-0.094786	0.0297343	0.0702736	5037
HNSC	PEBP1	InfiltrationScore	-0.0215367	0.62214	0.717387	5037
HNSC	PEBP1	MAIT	-0.0399812	0.360117	0.560219	5037
HNSC	PEBP1	Macrophage	0.0320059	0.463871	0.561356	5037
HNSC	PEBP1	Monocyte	0.112054	0.0101136	0.0360573	5037
HNSC	PEBP1	NK	-0.0991296	0.022984	0.0465346	5037
HNSC	PEBP1	NKT	0.0754699	0.0837684	0.164957	5037
HNSC	PEBP1	Neutrophil	0.0488767	0.263152	0.37909	5037
HNSC	PEBP1	Tfh	-0.0946622	0.0299493	0.0570004	5037
HNSC	PEBP1	Th1	-0.0745151	0.0877681	0.126899	5037
HNSC	PEBP1	Th17	0.0524011	0.230229	0.316652	5037
HNSC	PEBP1	Th2	-0.0775072	0.0757252	0.238785	5037
HNSC	PEBP1	Tr1	0.092562	0.0338052	0.0659175	5037
HNSC	PEBP1	iTreg	0.0579117	0.184794	0.235712	5037
HNSC	PEBP1	nTreg	-0.0109878	0.801497	0.87031	5037
HNSC	YY1	Bcell	-0.00708522	0.871217	0.918043	7528
HNSC	YY1	CD4_T	0.0279005	0.523154	0.648404	7528
HNSC	YY1	CD4_naive	-0.0508133	0.244681	0.347166	7528
HNSC	YY1	CD8_T	-0.044493	0.308436	0.431624	7528
HNSC	YY1	CD8_naive	0.00194569	0.964492	0.976781	7528
HNSC	YY1	Central_memory	0.0261589	0.549425	0.632173	7528
HNSC	YY1	Cytotoxic	-0.00373181	0.931956	0.948933	7528
HNSC	YY1	DC	-0.00757491	0.862402	0.916907	7528
HNSC	YY1	Effector_memory	-0.0782199	0.0730646	0.132717	7528
HNSC	YY1	Exhausted	-0.0232063	0.595394	0.679605	7528
HNSC	YY1	Gamma_delta	-0.0824869	0.0586867	0.121272	7528
HNSC	YY1	InfiltrationScore	-0.0132022	0.762591	0.830771	7528
HNSC	YY1	MAIT	0.0670459	0.124601	0.277144	7528
HNSC	YY1	Macrophage	0.0557607	0.201671	0.291008	7528
HNSC	YY1	Monocyte	0.0342584	0.433001	0.591409	7528
HNSC	YY1	NK	-0.0249001	0.56881	0.659601	7528
HNSC	YY1	NKT	0.0830463	0.0569886	0.121307	7528
HNSC	YY1	Neutrophil	-0.00999198	0.819161	0.876039	7528
HNSC	YY1	Tfh	-0.0336709	0.440937	0.551712	7528
HNSC	YY1	Th1	-0.0134334	0.758561	0.803987	7528
HNSC	YY1	Th17	-0.0641882	0.141521	0.212012	7528
HNSC	YY1	Th2	-0.0467653	0.284358	0.534273	7528
HNSC	YY1	Tr1	0.140444	0.00124047	0.00386993	7528
HNSC	YY1	iTreg	0.113026	0.00947682	0.0168744	7528
HNSC	YY1	nTreg	0.080338	0.0656038	0.14549	7528
KICH	PEBP1	Bcell	0.0438246	0.726791	0.877606	5037
KICH	PEBP1	CD4_T	-0.0428184	0.732826	0.991109	5037
KICH	PEBP1	CD4_naive	-0.102518	0.412726	0.811157	5037
KICH	PEBP1	CD8_T	-0.159521	0.200753	0.545951	5037
KICH	PEBP1	CD8_naive	-0.0546462	0.662988	0.865208	5037
KICH	PEBP1	Central_memory	0.00752958	0.952153	0.99955	5037
KICH	PEBP1	Cytotoxic	0.0615651	0.623379	0.820198	5037
KICH	PEBP1	DC	0.134964	0.279938	0.683191	5037
KICH	PEBP1	Effector_memory	-0.106326	0.395488	0.870075	5037
KICH	PEBP1	Exhausted	0.0108867	0.930865	0.968047	5037
KICH	PEBP1	Gamma_delta	-0.061167	0.625631	0.862497	5037
KICH	PEBP1	InfiltrationScore	0.0744653	0.552361	0.717288	5037
KICH	PEBP1	MAIT	0.00597096	0.962049	0.996292	5037
KICH	PEBP1	Macrophage	0.205693	0.09754	0.257518	5037
KICH	PEBP1	Monocyte	0.226428	0.0675215	0.642477	5037
KICH	PEBP1	NK	-0.0692261	0.580734	0.799222	5037
KICH	PEBP1	NKT	0.187331	0.132023	0.538529	5037
KICH	PEBP1	Neutrophil	-0.131399	0.292955	0.689448	5037
KICH	PEBP1	Tfh	-0.0892456	0.47609	0.738791	5037
KICH	PEBP1	Th1	0.0405458	0.746518	0.879477	5037
KICH	PEBP1	Th17	-0.0502438	0.688688	0.931208	5037
KICH	PEBP1	Th2	-0.0561263	0.654432	0.884446	5037
KICH	PEBP1	Tr1	0.18521	0.136534	0.705889	5037
KICH	PEBP1	iTreg	0.123551	0.32298	0.571625	5037
KICH	PEBP1	nTreg	0.128138	0.3052	0.654673	5037
KICH	YY1	Bcell	0.0579595	0.643897	0.832673	7528
KICH	YY1	CD4_T	-0.136263	0.275294	0.978338	7528
KICH	YY1	CD4_naive	0.190717	0.125053	0.571524	7528
KICH	YY1	CD8_T	-0.101003	0.4197	0.737378	7528
KICH	YY1	CD8_naive	0.097711	0.43509	0.738071	7528
KICH	YY1	Central_memory	0.00547986	0.965169	0.99955	7528
KICH	YY1	Cytotoxic	-0.118871	0.341787	0.61732	7528
KICH	YY1	DC	0.0118159	0.92498	0.981671	7528
KICH	YY1	Effector_memory	-0.103506	0.40821	0.874946	7528
KICH	YY1	Exhausted	-0.0277116	0.825193	0.910575	7528
KICH	YY1	Gamma_delta	0.0582005	0.642517	0.86926	7528
KICH	YY1	InfiltrationScore	-0.0630252	0.61515	0.766592	7528
KICH	YY1	MAIT	-0.0518597	0.679212	0.954754	7528
KICH	YY1	Macrophage	0.045009	0.719707	0.849767	7528
KICH	YY1	Monocyte	0.169158	0.174528	0.774626	7528
KICH	YY1	NK	-0.251289	0.0418246	0.187516	7528
KICH	YY1	NKT	0.0900377	0.472168	0.796969	7528
KICH	YY1	Neutrophil	0.103549	0.408016	0.780784	7528
KICH	YY1	Tfh	-0.098619	0.430814	0.706815	7528
KICH	YY1	Th1	-0.0589605	0.638173	0.814723	7528
KICH	YY1	Th17	0.162321	0.19286	0.708241	7528
KICH	YY1	Th2	-0.234716	0.057828	0.324824	7528
KICH	YY1	Tr1	-0.0759007	0.544705	0.9127	7528
KICH	YY1	iTreg	-0.074064	0.55451	0.761783	7528
KICH	YY1	nTreg	-0.112654	0.367806	0.705578	7528
KIRC	PEBP1	Bcell	0.0313184	0.576118	0.822917	5037
KIRC	PEBP1	CD4_T	0.0365676	0.513869	0.639346	5037
KIRC	PEBP1	CD4_naive	-0.01718	0.759127	0.879076	5037
KIRC	PEBP1	CD8_T	-0.0182611	0.744481	0.808232	5037
KIRC	PEBP1	CD8_naive	0.0352882	0.528715	0.779092	5037
KIRC	PEBP1	Central_memory	0.0608439	0.277097	0.457134	5037
KIRC	PEBP1	Cytotoxic	-0.11477	0.0398753	0.145271	5037
KIRC	PEBP1	DC	0.0925536	0.0978596	0.271801	5037
KIRC	PEBP1	Effector_memory	-0.0217733	0.697553	0.898723	5037
KIRC	PEBP1	Exhausted	-0.0258072	0.645052	0.784179	5037
KIRC	PEBP1	Gamma_delta	-0.138528	0.0129829	0.0600052	5037
KIRC	PEBP1	InfiltrationScore	0.0976186	0.0807533	0.207695	5037
KIRC	PEBP1	MAIT	0.145406	0.00908391	0.0512675	5037
KIRC	PEBP1	Macrophage	0.159842	0.00409037	0.0175177	5037
KIRC	PEBP1	Monocyte	0.0324923	0.561895	0.812601	5037
KIRC	PEBP1	NK	-0.134245	0.0160966	0.0888161	5037
KIRC	PEBP1	NKT	0.168876	0.00239983	0.0185191	5037
KIRC	PEBP1	Neutrophil	-0.0660259	0.23815	0.327173	5037
KIRC	PEBP1	Tfh	-0.03933	0.482568	0.60173	5037
KIRC	PEBP1	Th1	0.0216457	0.699239	0.795721	5037
KIRC	PEBP1	Th17	-0.0672418	0.229598	0.414261	5037
KIRC	PEBP1	Th2	-0.0922013	0.0991493	0.189195	5037
KIRC	PEBP1	Tr1	0.0941888	0.0920473	0.218476	5037
KIRC	PEBP1	iTreg	0.114913	0.039626	0.0923612	5037
KIRC	PEBP1	nTreg	0.0977791	0.0802536	0.196768	5037
KIRC	YY1	Bcell	-0.0922526	0.0989605	0.409891	7528
KIRC	YY1	CD4_T	-0.137074	0.013975	0.0397594	7528
KIRC	YY1	CD4_naive	0.0228105	0.683903	0.831509	7528
KIRC	YY1	CD8_T	-0.121485	0.0295428	0.0652524	7528
KIRC	YY1	CD8_naive	-0.0420302	0.452997	0.727067	7528
KIRC	YY1	Central_memory	0.0416603	0.456987	0.631095	7528
KIRC	YY1	Cytotoxic	-0.0855952	0.12592	0.296954	7528
KIRC	YY1	DC	0.200852	0.000292915	0.0101986	7528
KIRC	YY1	Effector_memory	-0.0982721	0.0787342	0.458388	7528
KIRC	YY1	Exhausted	-0.0818607	0.143361	0.278588	7528
KIRC	YY1	Gamma_delta	-0.0519083	0.353921	0.544914	7528
KIRC	YY1	InfiltrationScore	0.0809824	0.147719	0.322491	7528
KIRC	YY1	MAIT	0.0126553	0.821308	0.927175	7528
KIRC	YY1	Macrophage	0.0802182	0.151592	0.304272	7528
KIRC	YY1	Monocyte	0.110359	0.0482046	0.244811	7528
KIRC	YY1	NK	-0.0742044	0.184799	0.390432	7528
KIRC	YY1	NKT	0.128277	0.0215161	0.101723	7528
KIRC	YY1	Neutrophil	0.0845006	0.130852	0.199274	7528
KIRC	YY1	Tfh	-0.105753	0.0584059	0.12242	7528
KIRC	YY1	Th1	-0.112149	0.0446636	0.10388	7528
KIRC	YY1	Th17	0.0261403	0.64079	0.793525	7528
KIRC	YY1	Th2	0.0484581	0.386863	0.534426	7528
KIRC	YY1	Tr1	-0.0395566	0.480047	0.670638	7528
KIRC	YY1	iTreg	-0.0410735	0.463357	0.612344	7528
KIRC	YY1	nTreg	0.0147597	0.792223	0.891901	7528
KIRP	PEBP1	Bcell	-0.052513	0.383951	0.71379	5037
KIRP	PEBP1	CD4_T	0.00502836	0.933604	0.959539	5037
KIRP	PEBP1	CD4_naive	-0.0524829	0.384224	0.630953	5037
KIRP	PEBP1	CD8_T	0.0120247	0.842081	0.911824	5037
KIRP	PEBP1	CD8_naive	0.0303933	0.614491	0.782305	5037
KIRP	PEBP1	Central_memory	-0.0753897	0.210992	0.290012	5037
KIRP	PEBP1	Cytotoxic	0.0672744	0.264478	0.379671	5037
KIRP	PEBP1	DC	-0.0325964	0.589058	0.760603	5037
KIRP	PEBP1	Effector_memory	0.0284048	0.63785	0.854429	5037
KIRP	PEBP1	Exhausted	0.0510574	0.397288	0.528814	5037
KIRP	PEBP1	Gamma_delta	-0.129749	0.0308641	0.105207	5037
KIRP	PEBP1	InfiltrationScore	0.0241625	0.688873	0.789258	5037
KIRP	PEBP1	MAIT	-0.00973866	0.871814	0.920712	5037
KIRP	PEBP1	Macrophage	0.0322657	0.592844	0.769219	5037
KIRP	PEBP1	Monocyte	0.0446739	0.458979	0.590339	5037
KIRP	PEBP1	NK	1.6374e-05	0.999784	0.999841	5037
KIRP	PEBP1	NKT	-0.0226576	0.707332	0.837947	5037
KIRP	PEBP1	Neutrophil	0.072301	0.23035	0.357783	5037
KIRP	PEBP1	Tfh	-0.0510865	0.397019	0.571411	5037
KIRP	PEBP1	Th1	0.0100611	0.867608	0.911049	5037
KIRP	PEBP1	Th17	-0.00110104	0.985446	0.992955	5037
KIRP	PEBP1	Th2	-0.111701	0.0633847	0.317698	5037
KIRP	PEBP1	Tr1	0.119291	0.0473116	0.111054	5037
KIRP	PEBP1	iTreg	0.0333396	0.580588	0.691477	5037
KIRP	PEBP1	nTreg	0.0391709	0.516186	0.658262	5037
KIRP	YY1	Bcell	-0.0493635	0.413153	0.735109	7528
KIRP	YY1	CD4_T	-0.069294	0.250371	0.397577	7528
KIRP	YY1	CD4_naive	0.0261202	0.665135	0.826966	7528
KIRP	YY1	CD8_T	0.0760353	0.207098	0.355022	7528
KIRP	YY1	CD8_naive	-0.0766082	0.203687	0.403464	7528
KIRP	YY1	Central_memory	0.0996646	0.0978489	0.151573	7528
KIRP	YY1	Cytotoxic	0.110022	0.0674899	0.125773	7528
KIRP	YY1	DC	0.0210122	0.727712	0.852459	7528
KIRP	YY1	Effector_memory	-0.0131266	0.827826	0.94106	7528
KIRP	YY1	Exhausted	0.0569485	0.34502	0.477761	7528
KIRP	YY1	Gamma_delta	-0.0552736	0.359417	0.546732	7528
KIRP	YY1	InfiltrationScore	0.0202006	0.737837	0.825362	7528
KIRP	YY1	MAIT	0.0589701	0.328138	0.476754	7528
KIRP	YY1	Macrophage	0.0395516	0.512114	0.708292	7528
KIRP	YY1	Monocyte	-0.0238281	0.692961	0.785715	7528
KIRP	YY1	NK	0.0483575	0.42275	0.523824	7528
KIRP	YY1	NKT	-0.146999	0.0143329	0.0472461	7528
KIRP	YY1	Neutrophil	-0.0356107	0.555065	0.695558	7528
KIRP	YY1	Tfh	0.0818037	0.174589	0.3138	7528
KIRP	YY1	Th1	0.0673659	0.263827	0.376309	7528
KIRP	YY1	Th17	-0.0205641	0.733297	0.846522	7528
KIRP	YY1	Th2	0.0990641	0.099898	0.389191	7528
KIRP	YY1	Tr1	-0.0119601	0.842918	0.904252	7528
KIRP	YY1	iTreg	0.0113293	0.851103	0.901919	7528
KIRP	YY1	nTreg	0.0320314	0.595533	0.723097	7528
LAML	PEBP1	Bcell	-0.0828954	0.282509	0.508176	5037
LAML	PEBP1	CD4_T	0.0728766	0.344945	0.59386	5037
LAML	PEBP1	CD4_naive	-0.146233	0.0570638	0.651977	5037
LAML	PEBP1	CD8_T	0.0852797	0.268846	0.494445	5037
LAML	PEBP1	CD8_naive	0.0435965	0.572411	0.941708	5037
LAML	PEBP1	Central_memory	-0.0714857	0.354254	0.558508	5037
LAML	PEBP1	Cytotoxic	0.0929084	0.228185	0.512013	5037
LAML	PEBP1	DC	-0.0482445	0.532132	0.850859	5037
LAML	PEBP1	Effector_memory	-0.0513473	0.506059	0.756675	5037
LAML	PEBP1	Exhausted	-0.0933833	0.225805	0.405382	5037
LAML	PEBP1	Gamma_delta	0.0962963	0.211595	0.587341	5037
LAML	PEBP1	InfiltrationScore	0.0302401	0.695455	0.900521	5037
LAML	PEBP1	MAIT	0.00973215	0.899765	0.951085	5037
LAML	PEBP1	Macrophage	0.0307714	0.690376	0.863713	5037
LAML	PEBP1	Monocyte	-0.00319255	0.967042	0.989489	5037
LAML	PEBP1	NK	0.00587111	0.93943	0.979062	5037
LAML	PEBP1	NKT	0.101101	0.189576	0.383372	5037
LAML	PEBP1	Neutrophil	-0.011828	0.878331	0.951768	5037
LAML	PEBP1	Tfh	-0.00489849	0.94945	0.97599	5037
LAML	PEBP1	Th1	-0.0726944	0.346155	0.571559	5037
LAML	PEBP1	Th17	-0.0346085	0.654121	0.941212	5037
LAML	PEBP1	Th2	0.0658542	0.393534	0.649846	5037
LAML	PEBP1	Tr1	0.0711286	0.35667	0.647431	5037
LAML	PEBP1	iTreg	-0.147879	0.0542958	0.285382	5037
LAML	PEBP1	nTreg	-0.216884	0.00449928	0.365466	5037
LAML	YY1	Bcell	0.146075	0.0573362	0.179716	7528
LAML	YY1	CD4_T	-0.0265388	0.731199	0.871336	7528
LAML	YY1	CD4_naive	0.0494422	0.521989	0.877742	7528
LAML	YY1	CD8_T	0.0208189	0.787567	0.892091	7528
LAML	YY1	CD8_naive	0.077815	0.313153	0.883643	7528
LAML	YY1	Central_memory	0.0957261	0.214325	0.41192	7528
LAML	YY1	Cytotoxic	-0.0462808	0.548975	0.787072	7528
LAML	YY1	DC	0.0696113	0.367047	0.755535	7528
LAML	YY1	Effector_memory	-0.00100854	0.989586	0.995779	7528
LAML	YY1	Exhausted	-0.0621503	0.420738	0.599991	7528
LAML	YY1	Gamma_delta	-0.0835513	0.278705	0.649933	7528
LAML	YY1	InfiltrationScore	0.0524549	0.496916	0.799259	7528
LAML	YY1	MAIT	-0.0896059	0.245221	0.469249	7528
LAML	YY1	Macrophage	0.0150822	0.84523	0.939574	7528
LAML	YY1	Monocyte	0.0128472	0.867939	0.948989	7528
LAML	YY1	NK	-0.189356	0.0133947	0.108177	7528
LAML	YY1	NKT	-0.0258808	0.737617	0.861251	7528
LAML	YY1	Neutrophil	0.0393632	0.610301	0.813481	7528
LAML	YY1	Tfh	-0.0412683	0.593113	0.783188	7528
LAML	YY1	Th1	-0.0837017	0.277837	0.503547	7528
LAML	YY1	Th17	0.084197	0.274994	0.796754	7528
LAML	YY1	Th2	-0.00473807	0.951103	0.979496	7528
LAML	YY1	Tr1	-0.0972177	0.207236	0.498512	7528
LAML	YY1	iTreg	-0.167769	0.0287551	0.201819	7528
LAML	YY1	nTreg	-0.0542155	0.482563	0.960172	7528
LGG	PEBP1	Bcell	0.100739	0.0165089	0.032262	5037
LGG	PEBP1	CD4_T	-0.122372	0.00354714	0.00806918	5037
LGG	PEBP1	CD4_naive	0.0299076	0.477636	0.799031	5037
LGG	PEBP1	CD8_T	-0.143351	0.0006249	0.0017219	5037
LGG	PEBP1	CD8_naive	0.00207028	0.960804	0.979165	5037
LGG	PEBP1	Central_memory	0.0721331	0.0864293	0.157495	5037
LGG	PEBP1	Cytotoxic	-0.211805	3.66331e-07	9.60261e-07	5037
LGG	PEBP1	DC	-0.0228313	0.587788	0.71622	5037
LGG	PEBP1	Effector_memory	-0.139569	0.000870299	0.00232276	5037
LGG	PEBP1	Exhausted	-0.100604	0.0166554	0.0294652	5037
LGG	PEBP1	Gamma_delta	-0.00803612	0.848709	0.909245	5037
LGG	PEBP1	InfiltrationScore	-0.093594	0.0259714	0.0635696	5037
LGG	PEBP1	MAIT	-0.188447	6.36499e-06	1.5197e-05	5037
LGG	PEBP1	Macrophage	-0.0909344	0.0305335	0.0675009	5037
LGG	PEBP1	Monocyte	0.0301549	0.474002	0.61286	5037
LGG	PEBP1	NK	-0.10804	0.0101054	0.0220782	5037
LGG	PEBP1	NKT	0.0470443	0.263839	0.5615	5037
LGG	PEBP1	Neutrophil	0.164843	8.1461e-05	0.000228534	5037
LGG	PEBP1	Tfh	-0.02703	0.52103	0.624991	5037
LGG	PEBP1	Th1	-0.204344	9.45838e-07	2.76726e-06	5037
LGG	PEBP1	Th17	0.109315	0.00924849	0.171965	5037
LGG	PEBP1	Th2	-0.180461	1.5651e-05	5.4079e-05	5037
LGG	PEBP1	Tr1	-0.115769	0.00582595	0.0215253	5037
LGG	PEBP1	iTreg	0.0503945	0.231294	0.635912	5037
LGG	PEBP1	nTreg	-0.0222143	0.597922	0.964156	5037
LGG	YY1	Bcell	0.00244502	0.953717	0.968008	7528
LGG	YY1	CD4_T	-0.0271961	0.518471	0.602732	7528
LGG	YY1	CD4_naive	0.0883526	0.0356023	0.33631	7528
LGG	YY1	CD8_T	0.0131289	0.755291	0.82774	7528
LGG	YY1	CD8_naive	0.0158775	0.706228	0.821775	7528
LGG	YY1	Central_memory	0.147385	0.000434994	0.00197883	7528
LGG	YY1	Cytotoxic	-0.00889586	0.83275	0.86806	7528
LGG	YY1	DC	-0.0293688	0.485608	0.628711	7528
LGG	YY1	Effector_memory	-0.123339	0.00329205	0.00738707	7528
LGG	YY1	Exhausted	0.0899573	0.0323741	0.0534897	7528
LGG	YY1	Gamma_delta	-0.0888628	0.0345476	0.102936	7528
LGG	YY1	InfiltrationScore	-0.0625112	0.13745	0.249167	7528
LGG	YY1	MAIT	0.0531615	0.206644	0.272069	7528
LGG	YY1	Macrophage	-0.0343303	0.414971	0.550921	7528
LGG	YY1	Monocyte	-0.0430039	0.307109	0.447682	7528
LGG	YY1	NK	-0.0625291	0.137337	0.213482	7528
LGG	YY1	NKT	-0.00904907	0.829913	0.933018	7528
LGG	YY1	Neutrophil	0.0667384	0.112736	0.175022	7528
LGG	YY1	Tfh	-0.109074	0.00940478	0.0282698	7528
LGG	YY1	Th1	-0.0903392	0.0316439	0.0504834	7528
LGG	YY1	Th17	0.143489	0.000617304	0.0646699	7528
LGG	YY1	Th2	-0.00786664	0.851863	0.885214	7528
LGG	YY1	Tr1	-0.109145	0.00935885	0.0310981	7528
LGG	YY1	iTreg	-0.0323484	0.442432	0.787253	7528
LGG	YY1	nTreg	-0.0310026	0.461657	0.94848	7528
LIHC	PEBP1	Bcell	0.205778	5.4345e-05	0.000493183	5037
LIHC	PEBP1	CD4_T	0.282012	2.32588e-08	1.35979e-07	5037
LIHC	PEBP1	CD4_naive	0.109479	0.0331139	0.0767713	5037
LIHC	PEBP1	CD8_T	0.198962	9.6337e-05	0.000635424	5037
LIHC	PEBP1	CD8_naive	-0.0356987	0.488369	0.776914	5037
LIHC	PEBP1	Central_memory	0.127479	0.0130027	0.0446508	5037
LIHC	PEBP1	Cytotoxic	0.0233321	0.650701	0.810554	5037
LIHC	PEBP1	DC	0.0713274	0.165816	0.310589	5037
LIHC	PEBP1	Effector_memory	-0.0439291	0.393773	0.741778	5037
LIHC	PEBP1	Exhausted	0.132186	0.00998946	0.0312977	5037
LIHC	PEBP1	Gamma_delta	0.00318316	0.95075	0.975788	5037
LIHC	PEBP1	InfiltrationScore	0.122247	0.017267	0.0389831	5037
LIHC	PEBP1	MAIT	-0.0807423	0.116588	0.23357	5037
LIHC	PEBP1	Macrophage	-0.0418079	0.417033	0.571119	5037
LIHC	PEBP1	Monocyte	-0.195471	0.000128218	0.00431609	5037
LIHC	PEBP1	NK	0.0443876	0.38885	0.539172	5037
LIHC	PEBP1	NKT	0.155869	0.00234206	0.00933954	5037
LIHC	PEBP1	Neutrophil	-0.237852	2.83315e-06	1.3176e-05	5037
LIHC	PEBP1	Tfh	0.184159	0.000313093	0.0012667	5037
LIHC	PEBP1	Th1	0.12124	0.0182156	0.0614013	5037
LIHC	PEBP1	Th17	-0.259559	2.98358e-07	1.33252e-06	5037
LIHC	PEBP1	Th2	-0.00444173	0.931319	0.961788	5037
LIHC	PEBP1	Tr1	-0.0689977	0.180115	0.335779	5037
LIHC	PEBP1	iTreg	0.0908882	0.0771916	0.181502	5037
LIHC	PEBP1	nTreg	0.0387806	0.45159	0.681	5037
LIHC	YY1	Bcell	-0.101507	0.0483014	0.125278	7528
LIHC	YY1	CD4_T	0.0560401	0.276491	0.373545	7528
LIHC	YY1	CD4_naive	0.0174911	0.734296	0.816911	7528
LIHC	YY1	CD8_T	-0.0135373	0.792794	0.884503	7528
LIHC	YY1	CD8_naive	-0.0429073	0.404878	0.714963	7528
LIHC	YY1	Central_memory	0.0385986	0.453718	0.606084	7528
LIHC	YY1	Cytotoxic	0.0437131	0.396105	0.61468	7528
LIHC	YY1	DC	0.198725	9.8238e-05	0.000753506	7528
LIHC	YY1	Effector_memory	0.00737405	0.886223	0.968551	7528
LIHC	YY1	Exhausted	-0.0927769	0.0712156	0.157278	7528
LIHC	YY1	Gamma_delta	-0.0232886	0.651309	0.810645	7528
LIHC	YY1	InfiltrationScore	0.124447	0.0153443	0.0352331	7528
LIHC	YY1	MAIT	0.0236511	0.646248	0.774985	7528
LIHC	YY1	Macrophage	0.153205	0.00278602	0.0110971	7528
LIHC	YY1	Monocyte	-0.0194805	0.70541	0.869321	7528
LIHC	YY1	NK	0.0637124	0.215898	0.352535	7528
LIHC	YY1	NKT	0.0126095	0.806705	0.892828	7528
LIHC	YY1	Neutrophil	-0.0571406	0.267154	0.39207	7528
LIHC	YY1	Tfh	0.0503502	0.328274	0.474688	7528
LIHC	YY1	Th1	0.0311498	0.545468	0.725173	7528
LIHC	YY1	Th17	-0.0124064	0.809759	0.858367	7528
LIHC	YY1	Th2	0.0931674	0.0700285	0.191694	7528
LIHC	YY1	Tr1	0.0695076	0.17691	0.331829	7528
LIHC	YY1	iTreg	0.0834661	0.104723	0.227374	7528
LIHC	YY1	nTreg	0.0202992	0.693641	0.847679	7528
LUAD	PEBP1	Bcell	0.0524633	0.26147	0.469661	5037
LUAD	PEBP1	CD4_T	-0.0780394	0.0945727	0.15853	5037
LUAD	PEBP1	CD4_naive	-0.0400785	0.391117	0.673534	5037
LUAD	PEBP1	CD8_T	-0.053272	0.254179	0.41476	5037
LUAD	PEBP1	CD8_naive	0.0264439	0.571588	0.731058	5037
LUAD	PEBP1	Central_memory	0.0200443	0.668087	0.786019	5037
LUAD	PEBP1	Cytotoxic	-0.0140949	0.763038	0.839882	5037
LUAD	PEBP1	DC	0.0352428	0.450818	0.573832	5037
LUAD	PEBP1	Effector_memory	-0.0159764	0.732543	0.82181	5037
LUAD	PEBP1	Exhausted	0.0176519	0.705735	0.806307	5037
LUAD	PEBP1	Gamma_delta	0.0227934	0.625835	0.761899	5037
LUAD	PEBP1	InfiltrationScore	0.0136343	0.77056	0.835382	5037
LUAD	PEBP1	MAIT	-0.0509578	0.275423	0.471339	5037
LUAD	PEBP1	Macrophage	0.0553001	0.236518	0.375476	5037
LUAD	PEBP1	Monocyte	0.087657	0.0603079	0.184231	5037
LUAD	PEBP1	NK	-0.072352	0.121241	0.210931	5037
LUAD	PEBP1	NKT	0.00295345	0.949629	0.972781	5037
LUAD	PEBP1	Neutrophil	0.0269335	0.564486	0.663226	5037
LUAD	PEBP1	Tfh	-0.0674242	0.148796	0.242297	5037
LUAD	PEBP1	Th1	0.012927	0.782156	0.861364	5037
LUAD	PEBP1	Th17	-0.0848104	0.0691702	0.122375	5037
LUAD	PEBP1	Th2	-0.0510767	0.274304	0.467754	5037
LUAD	PEBP1	Tr1	0.00457127	0.92211	0.968046	5037
LUAD	PEBP1	iTreg	0.0102	0.827292	0.892516	5037
LUAD	PEBP1	nTreg	0.0140259	0.764163	0.839088	5037
LUAD	YY1	Bcell	0.00224365	0.961724	0.980697	7528
LUAD	YY1	CD4_T	0.0189153	0.685756	0.766345	7528
LUAD	YY1	CD4_naive	0.000749102	0.987216	0.994124	7528
LUAD	YY1	CD8_T	-0.0575304	0.218116	0.370114	7528
LUAD	YY1	CD8_naive	-0.0665533	0.154126	0.296789	7528
LUAD	YY1	Central_memory	0.0187949	0.687652	0.800044	7528
LUAD	YY1	Cytotoxic	0.107128	0.0215615	0.0436667	7528
LUAD	YY1	DC	0.163666	0.000424293	0.00212257	7528
LUAD	YY1	Effector_memory	-0.0586059	0.209618	0.336203	7528
LUAD	YY1	Exhausted	0.0523684	0.262335	0.396938	7528
LUAD	YY1	Gamma_delta	0.0321508	0.491541	0.656009	7528
LUAD	YY1	InfiltrationScore	0.11435	0.0141309	0.0300561	7528
LUAD	YY1	MAIT	0.0622423	0.18266	0.360607	7528
LUAD	YY1	Macrophage	0.0921584	0.0482221	0.109861	7528
LUAD	YY1	Monocyte	0.0296053	0.52649	0.718391	7528
LUAD	YY1	NK	0.0409849	0.380483	0.513767	7528
LUAD	YY1	NKT	0.0479658	0.304636	0.482638	7528
LUAD	YY1	Neutrophil	-0.0593519	0.203867	0.292528	7528
LUAD	YY1	Tfh	0.0341725	0.464695	0.587039	7528
LUAD	YY1	Th1	0.0172453	0.712209	0.812777	7528
LUAD	YY1	Th17	-0.0191508	0.682056	0.77315	7528
LUAD	YY1	Th2	-0.00215052	0.963312	0.980816	7528
LUAD	YY1	Tr1	-0.00365081	0.937758	0.974494	7528
LUAD	YY1	iTreg	0.00180053	0.96928	0.982306	7528
LUAD	YY1	nTreg	-0.0860254	0.0652653	0.127872	7528
LUSC	PEBP1	Bcell	-0.0403248	0.438692	0.645663	5037
LUSC	PEBP1	CD4_T	0.0026837	0.958913	0.970567	5037
LUSC	PEBP1	CD4_naive	0.0105475	0.839541	0.961518	5037
LUSC	PEBP1	CD8_T	-0.0867382	0.0952754	0.198187	5037
LUSC	PEBP1	CD8_naive	0.0902474	0.08257	0.151089	5037
LUSC	PEBP1	Central_memory	-0.00126658	0.980602	0.985035	5037
LUSC	PEBP1	Cytotoxic	-0.130647	0.0117773	0.0267109	5037
LUSC	PEBP1	DC	-0.0654909	0.208197	0.345361	5037
LUSC	PEBP1	Effector_memory	0.0417882	0.422245	0.543348	5037
LUSC	PEBP1	Exhausted	-0.0675585	0.194163	0.317082	5037
LUSC	PEBP1	Gamma_delta	-0.0610862	0.240503	0.482651	5037
LUSC	PEBP1	InfiltrationScore	-0.107875	0.0378135	0.0671427	5037
LUSC	PEBP1	MAIT	0.0544031	0.295969	0.492269	5037
LUSC	PEBP1	Macrophage	-0.0720188	0.166267	0.236804	5037
LUSC	PEBP1	Monocyte	-0.0302184	0.56177	0.711366	5037
LUSC	PEBP1	NK	-0.0559911	0.282076	0.388086	5037
LUSC	PEBP1	NKT	-0.00215009	0.967078	0.98396	5037
LUSC	PEBP1	Neutrophil	0.0684991	0.188013	0.268792	5037
LUSC	PEBP1	Tfh	-0.103603	0.0461336	0.0850636	5037
LUSC	PEBP1	Th1	-0.0437504	0.400767	0.553672	5037
LUSC	PEBP1	Th17	0.0386921	0.457467	0.658527	5037
LUSC	PEBP1	Th2	0.0627763	0.227715	0.399181	5037
LUSC	PEBP1	Tr1	-0.0495797	0.340927	0.465066	5037
LUSC	PEBP1	iTreg	-0.0386127	0.458391	0.59817	5037
LUSC	PEBP1	nTreg	0.052058	0.31731	0.531036	5037
LUSC	YY1	Bcell	0.00784233	0.880333	0.941296	7528
LUSC	YY1	CD4_T	-0.0416847	0.423397	0.506772	7528
LUSC	YY1	CD4_naive	0.0498279	0.338513	0.727911	7528
LUSC	YY1	CD8_T	0.0339333	0.514669	0.657975	7528
LUSC	YY1	CD8_naive	0.0671589	0.19682	0.303694	7528
LUSC	YY1	Central_memory	0.024826	0.633617	0.700591	7528
LUSC	YY1	Cytotoxic	-0.0187837	0.718391	0.797426	7528
LUSC	YY1	DC	0.00471931	0.927815	0.95613	7528
LUSC	YY1	Effector_memory	-0.0682143	0.18986	0.293577	7528
LUSC	YY1	Exhausted	-0.0508255	0.328918	0.46719	7528
LUSC	YY1	Gamma_delta	0.00205191	0.96858	0.986403	7528
LUSC	YY1	InfiltrationScore	0.0285717	0.583291	0.671698	7528
LUSC	YY1	MAIT	0.0951498	0.0671474	0.182176	7528
LUSC	YY1	Macrophage	0.0630837	0.225441	0.304984	7528
LUSC	YY1	Monocyte	-0.0380755	0.464672	0.633421	7528
LUSC	YY1	NK	0.0334767	0.520347	0.6242	7528
LUSC	YY1	NKT	-0.0265509	0.610213	0.763475	7528
LUSC	YY1	Neutrophil	-0.0715131	0.169271	0.245839	7528
LUSC	YY1	Tfh	0.0114404	0.826166	0.877985	7528
LUSC	YY1	Th1	0.0157097	0.762966	0.850316	7528
LUSC	YY1	Th17	0.0651975	0.210247	0.392976	7528
LUSC	YY1	Th2	-0.00580135	0.911326	0.953228	7528
LUSC	YY1	Tr1	-0.0204139	0.695122	0.782696	7528
LUSC	YY1	iTreg	-0.0399617	0.442828	0.583887	7528
LUSC	YY1	nTreg	-0.00973899	0.851694	0.924166	7528
MESO	PEBP1	Bcell	0.188813	0.0798692	0.285226	5037
MESO	PEBP1	CD4_T	0.0871812	0.422009	0.823457	5037
MESO	PEBP1	CD4_naive	0.148354	0.170269	0.818851	5037
MESO	PEBP1	CD8_T	0.0398786	0.713821	0.940742	5037
MESO	PEBP1	CD8_naive	-0.107363	0.322272	0.546705	5037
MESO	PEBP1	Central_memory	0.235751	0.0279333	0.116336	5037
MESO	PEBP1	Cytotoxic	0.0109921	0.919513	0.962228	5037
MESO	PEBP1	DC	-0.0635123	0.558934	0.966215	5037
MESO	PEBP1	Effector_memory	-0.0496005	0.648223	0.893764	5037
MESO	PEBP1	Exhausted	-0.0614881	0.571555	0.815531	5037
MESO	PEBP1	Gamma_delta	0.138433	0.201	0.500331	5037
MESO	PEBP1	InfiltrationScore	-0.12299	0.256419	0.599228	5037
MESO	PEBP1	MAIT	-0.00884972	0.935162	0.981771	5037
MESO	PEBP1	Macrophage	-0.146402	0.176025	0.621096	5037
MESO	PEBP1	Monocyte	-0.264299	0.0133714	0.104114	5037
MESO	PEBP1	NK	0.0443104	0.683625	0.886535	5037
MESO	PEBP1	NKT	0.162009	0.133824	0.618741	5037
MESO	PEBP1	Neutrophil	-0.122941	0.25661	0.51695	5037
MESO	PEBP1	Tfh	0.0947837	0.382519	0.624737	5037
MESO	PEBP1	Th1	0.125103	0.248277	0.496035	5037
MESO	PEBP1	Th17	-0.102248	0.345996	0.597266	5037
MESO	PEBP1	Th2	0.0717118	0.509216	0.854734	5037
MESO	PEBP1	Tr1	0.147906	0.171577	0.627593	5037
MESO	PEBP1	iTreg	0.255597	0.0168759	0.110711	5037
MESO	PEBP1	nTreg	0.131883	0.223353	0.681012	5037
MESO	YY1	Bcell	-0.268851	0.0118041	0.0854627	7528
MESO	YY1	CD4_T	-0.0115561	0.915398	0.981158	7528
MESO	YY1	CD4_naive	0.0181334	0.867603	0.98915	7528
MESO	YY1	CD8_T	-0.118897	0.272704	0.787994	7528
MESO	YY1	CD8_naive	0.167239	0.121558	0.30691	7528
MESO	YY1	Central_memory	-0.0954763	0.379035	0.642935	7528
MESO	YY1	Cytotoxic	-0.179273	0.0966233	0.275188	7528
MESO	YY1	DC	-0.135292	0.211512	0.885321	7528
MESO	YY1	Effector_memory	0.0436942	0.687795	0.91026	7528
MESO	YY1	Exhausted	-0.243996	0.0227586	0.216238	7528
MESO	YY1	Gamma_delta	-0.146877	0.174609	0.470921	7528
MESO	YY1	InfiltrationScore	-0.203112	0.0591845	0.325236	7528
MESO	YY1	MAIT	0.0339406	0.754974	0.912744	7528
MESO	YY1	Macrophage	-0.0826244	0.446762	0.82926	7528
MESO	YY1	Monocyte	0.0629258	0.562577	0.830316	7528
MESO	YY1	NK	-0.0999581	0.356961	0.697606	7528
MESO	YY1	NKT	-0.0589026	0.587866	0.882902	7528
MESO	YY1	Neutrophil	0.1462	0.176627	0.416272	7528
MESO	YY1	Tfh	-0.121266	0.263196	0.50489	7528
MESO	YY1	Th1	-0.232999	0.029869	0.124791	7528
MESO	YY1	Th17	0.285354	0.00738312	0.0609125	7528
MESO	YY1	Th2	-0.0691142	0.524717	0.862551	7528
MESO	YY1	Tr1	0.0297963	0.784113	0.946766	7528
MESO	YY1	iTreg	-0.00133109	0.990237	0.995929	7528
MESO	YY1	nTreg	0.145816	0.177778	0.646521	7528
OV	PEBP1	Bcell	-0.811723	0.0078893	0.835324	5037
OV	PEBP1	CD4_T	-0.209207	0.589047	0.992844	5037
OV	PEBP1	CD4_naive	0.136931	0.725369	0.80325	5037
OV	PEBP1	CD8_T	0	1	1	5037
OV	PEBP1	CD8_naive	0.1	0.809981	0.993504	5037
OV	PEBP1	Central_memory	0.683202	0.0424979	0.979831	5037
OV	PEBP1	Cytotoxic	0.316667	0.41008	0.929857	5037
OV	PEBP1	DC	0.716667	0.0368662	0.578799	5037
OV	PEBP1	Effector_memory	-0.0365148	0.925695	0.974558	5037
OV	PEBP1	Exhausted	0.217597	0.573835	0.892757	5037
OV	PEBP1	Gamma_delta	0.276153	0.471962	0.872443	5037
OV	PEBP1	InfiltrationScore	0.633333	0.0760362	0.754569	5037
OV	PEBP1	MAIT	0.0669462	0.864127	0.979582	5037
OV	PEBP1	Macrophage	0.716667	0.0368662	0.616753	5037
OV	PEBP1	Monocyte	0.766667	0.02139	1	5037
OV	PEBP1	NK	0.55	0.132777	0.976276	5037
OV	PEBP1	NKT	0.216667	0.580941	1	5037
OV	PEBP1	Neutrophil	-0.416667	0.269582	0.913982	5037
OV	PEBP1	Tfh	0.483333	0.1938	0.609991	5037
OV	PEBP1	Th1	0.133333	0.743541	0.923843	5037
OV	PEBP1	Th17	-0.416667	0.269582	1	5037
OV	PEBP1	Th2	0.216667	0.580941	0.890984	5037
OV	PEBP1	Tr1	-0.339032	0.372112	0.921078	5037
OV	PEBP1	iTreg	0.510465	0.160267	0.810556	5037
OV	PEBP1	nTreg	0.167365	0.666905	0.906965	5037
OV	YY1	Bcell	-0.393309	0.29499	0.990667	7528
OV	YY1	CD4_T	-0.711303	0.0316566	0.992844	7528
OV	YY1	CD4_naive	0.547723	0.12687	0.444409	7528
OV	YY1	CD8_T	0.316667	0.41008	0.994755	7528
OV	YY1	CD8_naive	0.416667	0.269582	0.984679	7528
OV	YY1	Central_memory	0.237635	0.5381	0.979831	7528
OV	YY1	Cytotoxic	0.183333	0.64364	0.973408	7528
OV	YY1	DC	-0.15	0.708069	0.950352	7528
OV	YY1	Effector_memory	-0.0547723	0.888697	0.966518	7528
OV	YY1	Exhausted	0.191485	0.621633	0.908631	7528
OV	YY1	Gamma_delta	0.594147	0.0915834	0.658948	7528
OV	YY1	InfiltrationScore	-0.333333	0.385323	0.910939	7528
OV	YY1	MAIT	-0.00836827	0.982953	0.989905	7528
OV	YY1	Macrophage	-0.133333	0.743541	0.96062	7528
OV	YY1	Monocyte	0.2	0.613404	1	7528
OV	YY1	NK	-0.0666667	0.880093	0.998917	7528
OV	YY1	NKT	0.216667	0.580941	1	7528
OV	YY1	Neutrophil	-0.0166667	0.98157	0.997756	7528
OV	YY1	Tfh	-0.183333	0.64364	0.888748	7528
OV	YY1	Th1	-0.266667	0.493331	0.827353	7528
OV	YY1	Th17	0.166667	0.677745	1	7528
OV	YY1	Th2	-0.0166667	0.98157	0.997204	7528
OV	YY1	Tr1	-0.711967	0.0314253	0.626765	7528
OV	YY1	iTreg	-0.0753145	0.847294	0.976469	7528
OV	YY1	nTreg	-0.167365	0.666905	0.906965	7528
PAAD	PEBP1	Bcell	0.0738934	0.32286	0.50883	5037
PAAD	PEBP1	CD4_T	-0.0893042	0.231879	0.346629	5037
PAAD	PEBP1	CD4_naive	-0.160161	0.0312609	0.202805	5037
PAAD	PEBP1	CD8_T	-0.00492007	0.947589	0.969886	5037
PAAD	PEBP1	CD8_naive	-0.0856027	0.251881	0.476172	5037
PAAD	PEBP1	Central_memory	0.187481	0.0114951	0.0374828	5037
PAAD	PEBP1	Cytotoxic	0.166821	0.0247972	0.0491857	5037
PAAD	PEBP1	DC	0.174227	0.0189907	0.120539	5037
PAAD	PEBP1	Effector_memory	-0.0364851	0.62582	0.808409	5037
PAAD	PEBP1	Exhausted	-0.00580275	0.938204	0.980714	5037
PAAD	PEBP1	Gamma_delta	-0.0269169	0.719081	0.823517	5037
PAAD	PEBP1	InfiltrationScore	0.238353	0.00123276	0.00410967	5037
PAAD	PEBP1	MAIT	0.0525795	0.482074	0.645239	5037
PAAD	PEBP1	Macrophage	0.236054	0.00137849	0.0182468	5037
PAAD	PEBP1	Monocyte	0.0730664	0.32832	0.492035	5037
PAAD	PEBP1	NK	0.097392	0.192131	0.277063	5037
PAAD	PEBP1	NKT	-0.104184	0.16279	0.483494	5037
PAAD	PEBP1	Neutrophil	-0.126588	0.0894884	0.157363	5037
PAAD	PEBP1	Tfh	0.0430902	0.564635	0.662901	5037
PAAD	PEBP1	Th1	0.106537	0.153451	0.479537	5037
PAAD	PEBP1	Th17	-0.108856	0.144649	0.224048	5037
PAAD	PEBP1	Th2	-0.0400429	0.592509	0.797656	5037
PAAD	PEBP1	Tr1	0.138721	0.0625485	0.128758	5037
PAAD	PEBP1	iTreg	0.331237	5.24582e-06	6.0049e-05	5037
PAAD	PEBP1	nTreg	0.212086	0.00415378	0.0216668	5037
PAAD	YY1	Bcell	-0.026478	0.723474	0.837933	7528
PAAD	YY1	CD4_T	-0.151729	0.0414516	0.0851023	7528
PAAD	YY1	CD4_naive	-0.0977773	0.19037	0.43917	7528
PAAD	YY1	CD8_T	-0.0869351	0.244548	0.394664	7528
PAAD	YY1	CD8_naive	-0.0138083	0.853627	0.926884	7528
PAAD	YY1	Central_memory	0.0412589	0.581311	0.7086	7528
PAAD	YY1	Cytotoxic	0.0850053	0.255218	0.342083	7528
PAAD	YY1	DC	0.0710668	0.341765	0.602338	7528
PAAD	YY1	Effector_memory	0.0309083	0.679573	0.84118	7528
PAAD	YY1	Exhausted	-0.0380958	0.61064	0.841853	7528
PAAD	YY1	Gamma_delta	-0.170988	0.0213668	0.0557939	7528
PAAD	YY1	InfiltrationScore	0.0391068	0.601194	0.685996	7528
PAAD	YY1	MAIT	-0.0416183	0.57802	0.722504	7528
PAAD	YY1	Macrophage	0.0765908	0.305462	0.558464	7528
PAAD	YY1	Monocyte	-0.00696925	0.925814	0.956947	7528
PAAD	YY1	NK	0.0731937	0.327475	0.424622	7528
PAAD	YY1	NKT	-0.118339	0.112596	0.407055	7528
PAAD	YY1	Neutrophil	0.0373233	0.6179	0.711843	7528
PAAD	YY1	Tfh	-0.0764539	0.30633	0.417164	7528
PAAD	YY1	Th1	0.00998495	0.893872	0.963926	7528
PAAD	YY1	Th17	0.0802288	0.282992	0.386667	7528
PAAD	YY1	Th2	0.0607738	0.416382	0.677099	7528
PAAD	YY1	Tr1	-0.0100975	0.892683	0.927894	7528
PAAD	YY1	iTreg	0.0546855	0.464676	0.572734	7528
PAAD	YY1	nTreg	0.138361	0.0632401	0.170286	7528
PCPG	PEBP1	Bcell	-0.18384	0.00989938	0.0313668	5037
PCPG	PEBP1	CD4_T	-0.17411	0.014662	0.0558393	5037
PCPG	PEBP1	CD4_naive	-0.0849981	0.236212	0.739566	5037
PCPG	PEBP1	CD8_T	-0.0791047	0.270414	0.694756	5037
PCPG	PEBP1	CD8_naive	0.164324	0.0213639	0.0666393	5037
PCPG	PEBP1	Central_memory	-0.106026	0.139128	0.507654	5037
PCPG	PEBP1	Cytotoxic	-0.0147223	0.837725	0.92486	5037
PCPG	PEBP1	DC	-0.044076	0.539602	0.867183	5037
PCPG	PEBP1	Effector_memory	-0.23293	0.00101813	0.0133093	5037
PCPG	PEBP1	Exhausted	-0.162687	0.0227115	0.275301	5037
PCPG	PEBP1	Gamma_delta	-0.0982247	0.170792	0.498044	5037
PCPG	PEBP1	InfiltrationScore	-0.0478566	0.505355	0.761566	5037
PCPG	PEBP1	MAIT	0.17559	0.0138281	0.0379305	5037
PCPG	PEBP1	Macrophage	-0.0542051	0.450506	0.738574	5037
PCPG	PEBP1	Monocyte	0.222713	0.00170375	0.0188495	5037
PCPG	PEBP1	NK	-0.0284522	0.692206	0.866032	5037
PCPG	PEBP1	NKT	0.0504421	0.482604	0.67924	5037
PCPG	PEBP1	Neutrophil	0.246635	0.000492522	0.00426399	5037
PCPG	PEBP1	Tfh	-0.084087	0.241291	0.555599	5037
PCPG	PEBP1	Th1	-0.209062	0.00327464	0.0274005	5037
PCPG	PEBP1	Th17	0.157028	0.0279503	0.188801	5037
PCPG	PEBP1	Th2	-0.0528509	0.461917	0.809201	5037
PCPG	PEBP1	Tr1	-0.0317938	0.658216	0.839227	5037
PCPG	PEBP1	iTreg	-0.151982	0.0334613	0.10681	5037
PCPG	PEBP1	nTreg	-0.198829	0.00521005	0.0158304	5037
PCPG	YY1	Bcell	0.164869	0.0209312	0.0577265	7528
PCPG	YY1	CD4_T	0.0476594	0.507113	0.674543	7528
PCPG	YY1	CD4_naive	-0.0752939	0.294242	0.760282	7528
PCPG	YY1	CD8_T	0.0243828	0.73444	0.930454	7528
PCPG	YY1	CD8_naive	0.0880464	0.219767	0.368981	7528
PCPG	YY1	Central_memory	-0.109374	0.127004	0.487675	7528
PCPG	YY1	Cytotoxic	0.10873	0.129271	0.326112	7528
PCPG	YY1	DC	0.0191212	0.790233	0.953134	7528
PCPG	YY1	Effector_memory	-0.067109	0.35001	0.585495	7528
PCPG	YY1	Exhausted	-0.0759017	0.290351	0.703708	7528
PCPG	YY1	Gamma_delta	-0.000194528	0.997841	0.999424	7528
PCPG	YY1	InfiltrationScore	0.0594081	0.408166	0.68905	7528
PCPG	YY1	MAIT	0.0489049	0.496063	0.647001	7528
PCPG	YY1	Macrophage	0.0127603	0.859108	0.948712	7528
PCPG	YY1	Monocyte	0.0137315	0.84851	0.924617	7528
PCPG	YY1	NK	0.0078767	0.91275	0.968547	7528
PCPG	YY1	NKT	0.0242255	0.736089	0.856196	7528
PCPG	YY1	Neutrophil	-0.096506	0.178437	0.338176	7528
PCPG	YY1	Tfh	-0.0143871	0.84137	0.943608	7528
PCPG	YY1	Th1	0.00899975	0.900371	0.951738	7528
PCPG	YY1	Th17	-0.106974	0.135609	0.428582	7528
PCPG	YY1	Th2	-0.0321641	0.65449	0.899421	7528
PCPG	YY1	Tr1	0.125619	0.0793657	0.309368	7528
PCPG	YY1	iTreg	0.0851137	0.235573	0.411896	7528
PCPG	YY1	nTreg	0.0702199	0.328075	0.455904	7528
PRAD	PEBP1	Bcell	-0.0634125	0.156828	0.430857	5037
PRAD	PEBP1	CD4_T	-0.105451	0.0183427	0.0306248	5037
PRAD	PEBP1	CD4_naive	0.190836	1.7385e-05	0.00015255	5037
PRAD	PEBP1	CD8_T	-0.0993242	0.0263583	0.0759085	5037
PRAD	PEBP1	CD8_naive	0.0416307	0.352908	0.604324	5037
PRAD	PEBP1	Central_memory	0.0971142	0.0299131	0.0572944	5037
PRAD	PEBP1	Cytotoxic	-0.14924	0.000815406	0.00192296	5037
PRAD	PEBP1	DC	0.032457	0.468983	0.587121	5037
PRAD	PEBP1	Effector_memory	-0.0837489	0.0613059	0.179185	5037
PRAD	PEBP1	Exhausted	-0.0575958	0.198539	0.29358	5037
PRAD	PEBP1	Gamma_delta	-0.0645336	0.149611	0.247483	5037
PRAD	PEBP1	InfiltrationScore	-0.109336	0.0144433	0.0333946	5037
PRAD	PEBP1	MAIT	0.0318899	0.47679	0.655081	5037
PRAD	PEBP1	Macrophage	-0.0246368	0.582594	0.710767	5037
PRAD	PEBP1	Monocyte	0.022294	0.618961	0.712043	5037
PRAD	PEBP1	NK	-0.105245	0.0185723	0.030975	5037
PRAD	PEBP1	NKT	-0.041744	0.351598	0.452151	5037
PRAD	PEBP1	Neutrophil	0.0830513	0.0635047	0.0968671	5037
PRAD	PEBP1	Tfh	-0.120114	0.00716996	0.0144038	5037
PRAD	PEBP1	Th1	-0.141875	0.00146979	0.00589579	5037
PRAD	PEBP1	Th17	0.166312	0.000187283	0.000480016	5037
PRAD	PEBP1	Th2	0.0067194	0.880863	0.940663	5037
PRAD	PEBP1	Tr1	-0.0444748	0.320959	0.498441	5037
PRAD	PEBP1	iTreg	0.0225626	0.614742	0.743094	5037
PRAD	PEBP1	nTreg	0.0687987	0.124451	0.227033	5037
PRAD	YY1	Bcell	-0.0928589	0.0379238	0.196434	7528
PRAD	YY1	CD4_T	-0.114051	0.0107042	0.0187386	7528
PRAD	YY1	CD4_naive	0.0735452	0.10046	0.179267	7528
PRAD	YY1	CD8_T	-0.055959	0.211618	0.344241	7528
PRAD	YY1	CD8_naive	0.0492144	0.272039	0.519862	7528
PRAD	YY1	Central_memory	-0.047138	0.292806	0.384814	7528
PRAD	YY1	Cytotoxic	-0.130212	0.0035367	0.00753949	7528
PRAD	YY1	DC	-0.0722147	0.10678	0.190565	7528
PRAD	YY1	Effector_memory	0.0308688	0.491023	0.666772	7528
PRAD	YY1	Exhausted	-0.0298276	0.505767	0.609049	7528
PRAD	YY1	Gamma_delta	-0.0198168	0.658452	0.747626	7528
PRAD	YY1	InfiltrationScore	-0.177928	6.3181e-05	0.000297511	7528
PRAD	YY1	MAIT	0.0217047	0.628263	0.776471	7528
PRAD	YY1	Macrophage	-0.15542	0.00048698	0.00250892	7528
PRAD	YY1	Monocyte	-0.000135082	0.997596	0.998056	7528
PRAD	YY1	NK	-0.0440017	0.326139	0.397668	7528
PRAD	YY1	NKT	0.0560477	0.210894	0.297863	7528
PRAD	YY1	Neutrophil	0.108333	0.0153724	0.026946	7528
PRAD	YY1	Tfh	-0.104535	0.0193859	0.0353447	7528
PRAD	YY1	Th1	-0.163681	0.000237228	0.00128393	7528
PRAD	YY1	Th17	0.193739	1.2848e-05	4.0346e-05	7528
PRAD	YY1	Th2	0.070866	0.113505	0.285632	7528
PRAD	YY1	Tr1	-0.0685116	0.126034	0.258616	7528
PRAD	YY1	iTreg	-0.0700011	0.117988	0.23755	7528
PRAD	YY1	nTreg	-0.0350012	0.434843	0.5717	7528
READ	PEBP1	Bcell	-0.112208	0.278981	0.770213	5037
READ	PEBP1	CD4_T	0.141617	0.171016	0.421354	5037
READ	PEBP1	CD4_naive	-0.0865083	0.404517	0.581272	5037
READ	PEBP1	CD8_T	0.0629187	0.544689	0.806699	5037
READ	PEBP1	CD8_naive	0.0197934	0.849006	0.957736	5037
READ	PEBP1	Central_memory	-0.0240473	0.81707	0.946331	5037
READ	PEBP1	Cytotoxic	0.196178	0.0567349	0.280783	5037
READ	PEBP1	DC	0.0448655	0.665943	0.924023	5037
READ	PEBP1	Effector_memory	-0.0491702	0.636075	0.927856	5037
READ	PEBP1	Exhausted	0.0886394	0.392997	0.874292	5037
READ	PEBP1	Gamma_delta	-0.0708669	0.494961	0.832987	5037
READ	PEBP1	InfiltrationScore	0.196872	0.055847	0.202192	5037
READ	PEBP1	MAIT	-0.0037098	0.971537	0.999667	5037
READ	PEBP1	Macrophage	0.191112	0.0635662	0.269336	5037
READ	PEBP1	Monocyte	0.178761	0.0830475	0.427852	5037
READ	PEBP1	NK	0.111638	0.281447	0.631093	5037
READ	PEBP1	NKT	-0.165896	0.10812	0.557551	5037
READ	PEBP1	Neutrophil	-0.091681	0.376896	0.687291	5037
READ	PEBP1	Tfh	-0.00282081	0.978356	0.992818	5037
READ	PEBP1	Th1	-0.0325584	0.754112	0.92744	5037
READ	PEBP1	Th17	0.0239128	0.818076	0.93558	5037
READ	PEBP1	Th2	0.190477	0.0644687	0.28113	5037
READ	PEBP1	Tr1	-0.0119146	0.908766	0.985596	5037
READ	PEBP1	iTreg	-0.0201864	0.846045	0.941361	5037
READ	PEBP1	nTreg	-0.0649506	0.531748	0.76901	5037
READ	YY1	Bcell	-0.0136856	0.895276	0.982965	7528
READ	YY1	CD4_T	0.0232329	0.823163	0.931058	7528
READ	YY1	CD4_naive	-0.150449	0.145591	0.402269	7528
READ	YY1	CD8_T	-0.114022	0.271232	0.615714	7528
READ	YY1	CD8_naive	0.176712	0.0866969	0.423622	7528
READ	YY1	Central_memory	-0.0679297	0.513055	0.815588	7528
READ	YY1	Cytotoxic	-0.129492	0.211044	0.563619	7528
READ	YY1	DC	-0.109182	0.292231	0.728193	7528
READ	YY1	Effector_memory	-0.12776	0.217266	0.721941	7528
READ	YY1	Exhausted	-0.134863	0.19256	0.786067	7528
READ	YY1	Gamma_delta	0.0464581	0.654829	0.905403	7528
READ	YY1	InfiltrationScore	-0.147148	0.154737	0.401621	7528
READ	YY1	MAIT	-0.0660414	0.524864	0.937074	7528
READ	YY1	Macrophage	-0.0909994	0.380469	0.716813	7528
READ	YY1	Monocyte	0.0124466	0.90471	0.972626	7528
READ	YY1	NK	-0.164181	0.111866	0.429331	7528
READ	YY1	NKT	0.0470843	0.650479	0.920795	7528
READ	YY1	Neutrophil	0.0746846	0.471953	0.762237	7528
READ	YY1	Tfh	-0.108066	0.297222	0.633901	7528
READ	YY1	Th1	-0.190638	0.0642386	0.419155	7528
READ	YY1	Th17	0.240717	0.0187824	0.233843	7528
READ	YY1	Th2	-0.109682	0.290015	0.640161	7528
READ	YY1	Tr1	-0.133188	0.198194	0.742405	7528
READ	YY1	iTreg	-0.232424	0.023419	0.175588	7528
READ	YY1	nTreg	-0.235546	0.02157	0.169061	7528
SARC	PEBP1	Bcell	0.0308539	0.613073	0.780358	5037
SARC	PEBP1	CD4_T	-0.0974155	0.109586	0.204829	5037
SARC	PEBP1	CD4_naive	-0.0837933	0.16899	0.271582	5037
SARC	PEBP1	CD8_T	-0.0406816	0.504846	0.664401	5037
SARC	PEBP1	CD8_naive	-0.0596025	0.328314	0.47236	5037
SARC	PEBP1	Central_memory	0.0438471	0.47225	0.628781	5037
SARC	PEBP1	Cytotoxic	0.00306368	0.959962	0.975464	5037
SARC	PEBP1	DC	0.163468	0.00700194	0.0211207	5037
SARC	PEBP1	Effector_memory	0.100412	0.0990414	0.355902	5037
SARC	PEBP1	Exhausted	0.0541286	0.374755	0.527435	5037
SARC	PEBP1	Gamma_delta	-0.0717259	0.239269	0.568906	5037
SARC	PEBP1	InfiltrationScore	0.0527627	0.386945	0.531795	5037
SARC	PEBP1	MAIT	0.00879117	0.885457	0.967972	5037
SARC	PEBP1	Macrophage	0.101837	0.0943155	0.153974	5037
SARC	PEBP1	Monocyte	0.0497924	0.414269	0.590552	5037
SARC	PEBP1	NK	-0.0115477	0.849915	0.912204	5037
SARC	PEBP1	NKT	0.18128	0.00274174	0.0217439	5037
SARC	PEBP1	Neutrophil	-0.115834	0.0568497	0.130105	5037
SARC	PEBP1	Tfh	0.000762376	0.990033	0.994753	5037
SARC	PEBP1	Th1	0.0661515	0.277857	0.429985	5037
SARC	PEBP1	Th17	0.0177475	0.771179	0.884892	5037
SARC	PEBP1	Th2	0.00705681	0.907942	0.956337	5037
SARC	PEBP1	Tr1	0.0383942	0.529114	0.706826	5037
SARC	PEBP1	iTreg	0.0969748	0.111209	0.190711	5037
SARC	PEBP1	nTreg	0.0308838	0.612729	0.742484	5037
SARC	YY1	Bcell	0.0601024	0.324267	0.542044	7528
SARC	YY1	CD4_T	0.113337	0.0624421	0.132108	7528
SARC	YY1	CD4_naive	-0.0220267	0.718119	0.803224	7528
SARC	YY1	CD8_T	0.0531921	0.383087	0.551539	7528
SARC	YY1	CD8_naive	-0.0786869	0.196577	0.319332	7528
SARC	YY1	Central_memory	0.0744346	0.221943	0.371554	7528
SARC	YY1	Cytotoxic	0.0828614	0.173796	0.303739	7528
SARC	YY1	DC	0.0683303	0.2623	0.39014	7528
SARC	YY1	Effector_memory	0.0313296	0.607607	0.818799	7528
SARC	YY1	Exhausted	0.0295383	0.628301	0.750306	7528
SARC	YY1	Gamma_delta	-0.0454805	0.455892	0.748885	7528
SARC	YY1	InfiltrationScore	0.0932583	0.125653	0.221744	7528
SARC	YY1	MAIT	-0.00443372	0.942084	0.985321	7528
SARC	YY1	Macrophage	0.0109536	0.857552	0.898762	7528
SARC	YY1	Monocyte	0.0552339	0.365066	0.544793	7528
SARC	YY1	NK	0.0482381	0.429009	0.594289	7528
SARC	YY1	NKT	0.0327219	0.591734	0.765974	7528
SARC	YY1	Neutrophil	-0.0600767	0.324473	0.490039	7528
SARC	YY1	Tfh	0.0736751	0.226708	0.374975	7528
SARC	YY1	Th1	0.043988	0.470826	0.620661	7528
SARC	YY1	Th17	-0.00385039	0.949693	0.977129	7528
SARC	YY1	Th2	0.0432387	0.478424	0.683615	7528
SARC	YY1	Tr1	-0.0662554	0.277101	0.481507	7528
SARC	YY1	iTreg	-0.136447	0.024683	0.0540618	7528
SARC	YY1	nTreg	-0.109284	0.0724783	0.16574	7528
SKCM	PEBP1	Bcell	0.00566051	0.901661	0.939929	5037
SKCM	PEBP1	CD4_T	0.0715658	0.117769	0.188892	5037
SKCM	PEBP1	CD4_naive	0.0236875	0.605056	0.792582	5037
SKCM	PEBP1	CD8_T	-0.018431	0.687418	0.777335	5037
SKCM	PEBP1	CD8_naive	0.0512284	0.263143	0.382906	5037
SKCM	PEBP1	Central_memory	0.0557489	0.223268	0.303808	5037
SKCM	PEBP1	Cytotoxic	-0.0320248	0.484399	0.589035	5037
SKCM	PEBP1	DC	-0.0517182	0.2586	0.494852	5037
SKCM	PEBP1	Effector_memory	-0.14429	0.00154407	0.0113437	5037
SKCM	PEBP1	Exhausted	-0.0405065	0.376386	0.523506	5037
SKCM	PEBP1	Gamma_delta	-0.0915203	0.045286	0.103303	5037
SKCM	PEBP1	InfiltrationScore	0.0337471	0.4612	0.569422	5037
SKCM	PEBP1	MAIT	0.130317	0.00427833	0.0145633	5037
SKCM	PEBP1	Macrophage	0.00871552	0.84911	0.917688	5037
SKCM	PEBP1	Monocyte	0.0423087	0.355505	0.489419	5037
SKCM	PEBP1	NK	-0.000450028	0.992162	0.995727	5037
SKCM	PEBP1	NKT	0.03494	0.445502	0.611761	5037
SKCM	PEBP1	Neutrophil	0.0118768	0.79543	0.848028	5037
SKCM	PEBP1	Tfh	0.0517005	0.258763	0.350387	5037
SKCM	PEBP1	Th1	-0.0168379	0.713187	0.807484	5037
SKCM	PEBP1	Th17	0.0294627	0.520044	0.686755	5037
SKCM	PEBP1	Th2	-0.0872004	0.0565049	0.129065	5037
SKCM	PEBP1	Tr1	0.0424288	0.354139	0.613442	5037
SKCM	PEBP1	iTreg	0.0215739	0.637649	0.725986	5037
SKCM	PEBP1	nTreg	-0.105588	0.0208149	0.0655001	5037
SKCM	YY1	Bcell	-0.0735127	0.108082	0.204362	7528
SKCM	YY1	CD4_T	0.030256	0.508865	0.617874	7528
SKCM	YY1	CD4_naive	0.0207082	0.651207	0.82093	7528
SKCM	YY1	CD8_T	0.00409741	0.92873	0.951704	7528
SKCM	YY1	CD8_naive	0.0892324	0.0509692	0.0976956	7528
SKCM	YY1	Central_memory	0.0206775	0.651691	0.72645	7528
SKCM	YY1	Cytotoxic	-0.0387664	0.397249	0.504752	7528
SKCM	YY1	DC	-0.025898	0.571788	0.766338	7528
SKCM	YY1	Effector_memory	0.010728	0.814839	0.892859	7528
SKCM	YY1	Exhausted	0.00344921	0.939982	0.964381	7528
SKCM	YY1	Gamma_delta	-0.0270972	0.554111	0.688059	7528
SKCM	YY1	InfiltrationScore	-0.0696173	0.128131	0.201995	7528
SKCM	YY1	MAIT	0.00130535	0.977268	0.986382	7528
SKCM	YY1	Macrophage	-0.0371536	0.417193	0.591897	7528
SKCM	YY1	Monocyte	0.0377147	0.410188	0.544361	7528
SKCM	YY1	NK	-0.122994	0.00703761	0.0164499	7528
SKCM	YY1	NKT	0.0226032	0.621683	0.758414	7528
SKCM	YY1	Neutrophil	0.023537	0.607352	0.690584	7528
SKCM	YY1	Tfh	-0.0388932	0.395706	0.494304	7528
SKCM	YY1	Th1	-0.0439965	0.336623	0.473361	7528
SKCM	YY1	Th17	0.0855453	0.0613743	0.146648	7528
SKCM	YY1	Th2	-0.0599854	0.189995	0.330748	7528
SKCM	YY1	Tr1	-0.0855181	0.0614573	0.268604	7528
SKCM	YY1	iTreg	-0.020002	0.662354	0.746752	7528
SKCM	YY1	nTreg	0.0604203	0.186797	0.346946	7528
STAD	PEBP1	Bcell	0.0389855	0.453447	0.606018	5037
STAD	PEBP1	CD4_T	-0.0728409	0.160903	0.232604	5037
STAD	PEBP1	CD4_naive	-0.00549661	0.915853	0.975782	5037
STAD	PEBP1	CD8_T	-0.0114515	0.825768	0.881952	5037
STAD	PEBP1	CD8_naive	-0.037981	0.465176	0.560645	5037
STAD	PEBP1	Central_memory	-0.141215	0.00636864	0.0231187	5037
STAD	PEBP1	Cytotoxic	0.0574354	0.269177	0.345595	5037
STAD	PEBP1	DC	0.0935814	0.0714171	0.161164	5037
STAD	PEBP1	Effector_memory	-0.104576	0.0438281	0.0908216	5037
STAD	PEBP1	Exhausted	0.00982871	0.850143	0.900769	5037
STAD	PEBP1	Gamma_delta	0.0652634	0.209167	0.324339	5037
STAD	PEBP1	InfiltrationScore	0.138925	0.00728589	0.0151487	5037
STAD	PEBP1	MAIT	-0.0824542	0.112361	0.257363	5037
STAD	PEBP1	Macrophage	0.126187	0.0148773	0.0348882	5037
STAD	PEBP1	Monocyte	0.0587572	0.258295	0.412026	5037
STAD	PEBP1	NK	0.0196998	0.7049	0.781919	5037
STAD	PEBP1	NKT	0.0607209	0.242694	0.428647	5037
STAD	PEBP1	Neutrophil	0.0318221	0.540635	0.629482	5037
STAD	PEBP1	Tfh	-0.0108073	0.835426	0.886151	5037
STAD	PEBP1	Th1	-0.0448347	0.388542	0.508107	5037
STAD	PEBP1	Th17	0.00292734	0.955126	0.970775	5037
STAD	PEBP1	Th2	-0.0654071	0.208164	0.312905	5037
STAD	PEBP1	Tr1	-0.059968	0.248596	0.364099	5037
STAD	PEBP1	iTreg	0.0120678	0.816553	0.886035	5037
STAD	PEBP1	nTreg	-0.0529504	0.308417	0.443667	5037
STAD	YY1	Bcell	0.0317756	0.541228	0.682847	7528
STAD	YY1	CD4_T	-0.0665994	0.199975	0.279256	7528
STAD	YY1	CD4_naive	0.0451484	0.385228	0.733627	7528
STAD	YY1	CD8_T	0.116505	0.0246293	0.0509804	7528
STAD	YY1	CD8_naive	-0.092132	0.0759354	0.128474	7528
STAD	YY1	Central_memory	-0.0361538	0.486936	0.659685	7528
STAD	YY1	Cytotoxic	0.173122	0.000798909	0.00196915	7528
STAD	YY1	DC	0.204764	6.9417e-05	0.000544418	7528
STAD	YY1	Effector_memory	-0.0773548	0.136441	0.231249	7528
STAD	YY1	Exhausted	0.0975489	0.0601614	0.111651	7528
STAD	YY1	Gamma_delta	0.213591	3.2705e-05	0.000223497	7528
STAD	YY1	InfiltrationScore	0.238394	3.32392e-06	1.6037e-05	7528
STAD	YY1	MAIT	-0.0823899	0.112642	0.25777	7528
STAD	YY1	Macrophage	0.265053	2.12528e-07	1.1582e-05	7528
STAD	YY1	Monocyte	0.0401886	0.439621	0.600419	7528
STAD	YY1	NK	0.0786607	0.129926	0.206173	7528
STAD	YY1	NKT	-0.0497501	0.338614	0.53415	7528
STAD	YY1	Neutrophil	-0.106201	0.0406352	0.0682504	7528
STAD	YY1	Tfh	0.0661914	0.202751	0.295567	7528
STAD	YY1	Th1	0.107947	0.037426	0.0732377	7528
STAD	YY1	Th17	-0.169217	0.00105133	0.00318636	7528
STAD	YY1	Th2	0.0483937	0.351964	0.46905	7528
STAD	YY1	Tr1	0.110201	0.033603	0.0704246	7528
STAD	YY1	iTreg	0.0514563	0.322287	0.47615	7528
STAD	YY1	nTreg	-0.0732026	0.158829	0.259155	7528
TGCT	PEBP1	Bcell	-0.0108506	0.88898	0.90368	5037
TGCT	PEBP1	CD4_T	0.151107	0.0505603	0.215023	5037
TGCT	PEBP1	CD4_naive	0.00259658	0.973352	0.998701	5037
TGCT	PEBP1	CD8_T	-0.00598354	0.938642	0.952386	5037
TGCT	PEBP1	CD8_naive	-0.133986	0.0833613	0.10574	5037
TGCT	PEBP1	Central_memory	0.0832689	0.283229	0.319685	5037
TGCT	PEBP1	Cytotoxic	0.0560934	0.470175	0.511652	5037
TGCT	PEBP1	DC	-0.0267551	0.730652	0.880111	5037
TGCT	PEBP1	Effector_memory	0.00239864	0.975383	0.981839	5037
TGCT	PEBP1	Exhausted	0.0347003	0.655204	0.72271	5037
TGCT	PEBP1	Gamma_delta	0.0712776	0.358549	0.930538	5037
TGCT	PEBP1	InfiltrationScore	-0.0460969	0.552955	0.660877	5037
TGCT	PEBP1	MAIT	0.0907652	0.241967	0.361489	5037
TGCT	PEBP1	Macrophage	-0.0636645	0.412297	0.48386	5037
TGCT	PEBP1	Monocyte	-0.0233893	0.763462	0.787727	5037
TGCT	PEBP1	NK	0.00683887	0.929892	0.951967	5037
TGCT	PEBP1	NKT	0.11689	0.131317	0.178452	5037
TGCT	PEBP1	Neutrophil	0.00181106	0.981412	0.986648	5037
TGCT	PEBP1	Tfh	0.0325403	0.675411	0.723175	5037
TGCT	PEBP1	Th1	-0.0260578	0.737411	0.790843	5037
TGCT	PEBP1	Th17	0.0242672	0.754861	0.798869	5037
TGCT	PEBP1	Th2	0.0691261	0.373276	0.434566	5037
TGCT	PEBP1	Tr1	0.011521	0.882169	0.967316	5037
TGCT	PEBP1	iTreg	-0.0334408	0.666958	0.826061	5037
TGCT	PEBP1	nTreg	-0.104746	0.176614	0.467306	5037
TGCT	YY1	Bcell	-0.603491	4.80482e-18	4.82792e-17	7528
TGCT	YY1	CD4_T	-0.135364	0.0802072	0.274122	7528
TGCT	YY1	CD4_naive	-0.0354784	0.647985	0.995237	7528
TGCT	YY1	CD8_T	-0.340524	6.28796e-06	2.2896e-05	7528
TGCT	YY1	CD8_naive	0.350995	3.09026e-06	8.41148e-06	7528
TGCT	YY1	Central_memory	-0.549416	1.23841e-14	7.75337e-14	7528
TGCT	YY1	Cytotoxic	-0.550387	1.08886e-14	4.40936e-14	7528
TGCT	YY1	DC	0.0765559	0.323977	0.629608	7528
TGCT	YY1	Effector_memory	-0.256821	0.000778087	0.00191332	7528
TGCT	YY1	Exhausted	-0.184726	0.0165248	0.033447	7528
TGCT	YY1	Gamma_delta	-0.0225418	0.771793	0.967377	7528
TGCT	YY1	InfiltrationScore	0.178728	0.0204503	0.0628286	7528
TGCT	YY1	MAIT	0.327212	1.4961e-05	0.000117516	7528
TGCT	YY1	Macrophage	0.268743	0.000427772	0.00239918	7528
TGCT	YY1	Monocyte	0.675411	1.00335e-23	8.03425e-23	7528
TGCT	YY1	NK	-0.200644	0.00911244	0.0220942	7528
TGCT	YY1	NKT	0.513132	1.14537e-12	6.78377e-12	7528
TGCT	YY1	Neutrophil	0.197282	0.0103709	0.0242043	7528
TGCT	YY1	Tfh	-0.385441	2.47813e-07	9.6753e-07	7528
TGCT	YY1	Th1	-0.393175	1.34974e-07	5.97375e-07	7528
TGCT	YY1	Th17	0.432478	4.79236e-09	2.04934e-08	7528
TGCT	YY1	Th2	0.390401	1.68131e-07	7.70276e-07	7528
TGCT	YY1	Tr1	-0.0925498	0.232795	0.701882	7528
TGCT	YY1	iTreg	-0.0696478	0.369672	0.610055	7528
TGCT	YY1	nTreg	0.0199848	0.797083	0.921267	7528
THCA	PEBP1	Bcell	0.0214699	0.622226	0.743415	5037
THCA	PEBP1	CD4_T	-0.0796775	0.0670767	0.129796	5037
THCA	PEBP1	CD4_naive	-0.0331909	0.446182	0.608053	5037
THCA	PEBP1	CD8_T	-0.0078045	0.857874	0.907316	5037
THCA	PEBP1	CD8_naive	-0.0498132	0.252746	0.373859	5037
THCA	PEBP1	Central_memory	0.0973081	0.0252142	0.0475307	5037
THCA	PEBP1	Cytotoxic	0.0425672	0.328484	0.445522	5037
THCA	PEBP1	DC	0.0251786	0.56338	0.679459	5037
THCA	PEBP1	Effector_memory	-0.0153999	0.723802	0.825253	5037
THCA	PEBP1	Exhausted	-0.0511601	0.240127	0.354345	5037
THCA	PEBP1	Gamma_delta	0.0501755	0.249308	0.440686	5037
THCA	PEBP1	InfiltrationScore	-0.0153913	0.723951	0.779831	5037
THCA	PEBP1	MAIT	-0.00439236	0.919721	0.947593	5037
THCA	PEBP1	Macrophage	0.00896195	0.837071	0.894112	5037
THCA	PEBP1	Monocyte	-0.067273	0.122257	0.243458	5037
THCA	PEBP1	NK	0.00639171	0.883398	0.923766	5037
THCA	PEBP1	NKT	0.0589426	0.175848	0.346628	5037
THCA	PEBP1	Neutrophil	-0.0121458	0.780473	0.828442	5037
THCA	PEBP1	Tfh	-0.00073666	0.986514	0.989764	5037
THCA	PEBP1	Th1	0.00195587	0.964204	0.975913	5037
THCA	PEBP1	Th17	0.0019575	0.964174	0.975448	5037
THCA	PEBP1	Th2	0.0100406	0.817787	0.902021	5037
THCA	PEBP1	Tr1	0.00889269	0.838313	0.891203	5037
THCA	PEBP1	iTreg	0.0200218	0.645906	0.733391	5037
THCA	PEBP1	nTreg	-0.00114069	0.979119	0.986817	5037
THCA	YY1	Bcell	-0.00244706	0.955223	0.976208	7528
THCA	YY1	CD4_T	0.066257	0.128014	0.217207	7528
THCA	YY1	CD4_naive	-0.0233858	0.591493	0.732671	7528
THCA	YY1	CD8_T	-0.0045684	0.916515	0.946826	7528
THCA	YY1	CD8_naive	-0.0483148	0.267319	0.390474	7528
THCA	YY1	Central_memory	0.0450985	0.300511	0.391503	7528
THCA	YY1	Cytotoxic	-0.0124545	0.775041	0.844218	7528
THCA	YY1	DC	0.0952114	0.028549	0.0600146	7528
THCA	YY1	Effector_memory	0.0613776	0.158636	0.29395	7528
THCA	YY1	Exhausted	-0.00321733	0.941151	0.965018	7528
THCA	YY1	Gamma_delta	-0.088885	0.0409965	0.113023	7528
THCA	YY1	InfiltrationScore	0.0780945	0.0727068	0.110494	7528
THCA	YY1	MAIT	-0.086319	0.0472174	0.0957237	7528
THCA	YY1	Macrophage	0.0692127	0.111827	0.190639	7528
THCA	YY1	Monocyte	0.097747	0.0245603	0.0724419	7528
THCA	YY1	NK	-0.0244596	0.574577	0.688434	7528
THCA	YY1	NKT	-0.0209991	0.629884	0.781998	7528
THCA	YY1	Neutrophil	-0.0437254	0.315482	0.399227	7528
THCA	YY1	Tfh	0.010145	0.815926	0.861109	7528
THCA	YY1	Th1	0.0765471	0.0785775	0.134247	7528
THCA	YY1	Th17	0.0227973	0.600859	0.705023	7528
THCA	YY1	Th2	-0.00742632	0.864693	0.929168	7528
THCA	YY1	Tr1	0.0477146	0.273314	0.386508	7528
THCA	YY1	iTreg	0.0658062	0.130635	0.203368	7528
THCA	YY1	nTreg	0.0910296	0.0363424	0.0839172	7528
THYM	PEBP1	Bcell	0.225175	0.0134098	0.0304636	5037
THYM	PEBP1	CD4_T	0.430399	9.27187e-07	3.14393e-06	5037
THYM	PEBP1	CD4_naive	0.334205	0.000191042	0.000861741	5037
THYM	PEBP1	CD8_T	0.467207	7.47102e-08	2.46723e-07	5037
THYM	PEBP1	CD8_naive	0.436577	6.20093e-07	2.01457e-06	5037
THYM	PEBP1	Central_memory	0.458226	1.4198e-07	7.87245e-07	5037
THYM	PEBP1	Cytotoxic	-0.104835	0.25448	0.45791	5037
THYM	PEBP1	DC	0.55746	3.75818e-11	2.49897e-10	5037
THYM	PEBP1	Effector_memory	-0.443512	3.90992e-07	1.4613e-06	5037
THYM	PEBP1	Exhausted	0.123045	0.18061	0.31024	5037
THYM	PEBP1	Gamma_delta	-0.200908	0.0277864	0.0712427	5037
THYM	PEBP1	InfiltrationScore	-0.159646	0.0815584	0.179204	5037
THYM	PEBP1	MAIT	-0.28005	0.00194881	0.010904	5037
THYM	PEBP1	Macrophage	-0.40828	3.6736e-06	1.1472e-05	5037
THYM	PEBP1	Monocyte	-0.441672	4.42326e-07	1.33457e-06	5037
THYM	PEBP1	NK	-0.208622	0.0222168	0.0463836	5037
THYM	PEBP1	NKT	-0.196041	0.0318799	0.0603204	5037
THYM	PEBP1	Neutrophil	-0.280188	0.00193843	0.00546826	5037
THYM	PEBP1	Tfh	0.402337	5.23148e-06	1.6939e-05	5037
THYM	PEBP1	Th1	-0.302205	0.000794706	0.0063042	5037
THYM	PEBP1	Th17	0.178516	0.0510839	0.239565	5037
THYM	PEBP1	Th2	-0.243974	0.00724584	0.0179577	5037
THYM	PEBP1	Tr1	0.0887878	0.334872	0.515339	5037
THYM	PEBP1	iTreg	-0.139627	0.128262	0.365897	5037
THYM	PEBP1	nTreg	-0.426688	1.17619e-06	4.1088e-05	5037
THYM	YY1	Bcell	-0.0403051	0.662056	0.772174	7528
THYM	YY1	CD4_T	-0.189145	0.0385452	0.061711	7528
THYM	YY1	CD4_naive	-0.125054	0.173542	0.261848	7528
THYM	YY1	CD8_T	-0.0494721	0.591546	0.677909	7528
THYM	YY1	CD8_naive	-0.180108	0.0490152	0.0774226	7528
THYM	YY1	Central_memory	-0.160867	0.0792218	0.120197	7528
THYM	YY1	Cytotoxic	0.0554911	0.54719	0.717122	7528
THYM	YY1	DC	-0.00199688	0.98273	0.987432	7528
THYM	YY1	Effector_memory	0.102039	0.267439	0.345784	7528
THYM	YY1	Exhausted	0.0147129	0.87328	0.927374	7528
THYM	YY1	Gamma_delta	0.0476813	0.605052	0.707894	7528
THYM	YY1	InfiltrationScore	0.144866	0.114414	0.232555	7528
THYM	YY1	MAIT	0.040352	0.661687	0.768819	7528
THYM	YY1	Macrophage	0.118595	0.197016	0.274538	7528
THYM	YY1	Monocyte	0.174825	0.0561583	0.088196	7528
THYM	YY1	NK	0.217724	0.0169029	0.0364652	7528
THYM	YY1	NKT	0.209352	0.0217434	0.0424563	7528
THYM	YY1	Neutrophil	-0.0400546	0.664029	0.775894	7528
THYM	YY1	Tfh	-0.15667	0.0874816	0.144283	7528
THYM	YY1	Th1	0.0928383	0.313201	0.451112	7528
THYM	YY1	Th17	-0.140996	0.124527	0.364665	7528
THYM	YY1	Th2	0.0924409	0.315286	0.439593	7528
THYM	YY1	Tr1	-0.0304562	0.741237	0.843783	7528
THYM	YY1	iTreg	0.0701957	0.446151	0.671351	7528
THYM	YY1	nTreg	0.0635088	0.490749	0.608297	7528
UCEC	PEBP1	Bcell	0.202476	0.00737535	0.0910293	5037
UCEC	PEBP1	CD4_T	-0.1743	0.0214347	0.102858	5037
UCEC	PEBP1	CD4_naive	0.103762	0.17303	0.853561	5037
UCEC	PEBP1	CD8_T	-0.139737	0.0659151	0.215532	5037
UCEC	PEBP1	CD8_naive	0.00642764	0.932916	0.965621	5037
UCEC	PEBP1	Central_memory	0.0194661	0.798763	0.897545	5037
UCEC	PEBP1	Cytotoxic	-0.136982	0.0714836	0.19339	5037
UCEC	PEBP1	DC	0.0646852	0.396441	0.718944	5037
UCEC	PEBP1	Effector_memory	-0.0991948	0.19283	0.715514	5037
UCEC	PEBP1	Exhausted	-0.0253676	0.73969	0.82899	5037
UCEC	PEBP1	Gamma_delta	-0.0245835	0.74746	0.953363	5037
UCEC	PEBP1	InfiltrationScore	0.00579076	0.93955	0.969806	5037
UCEC	PEBP1	MAIT	0.0164311	0.829617	0.971284	5037
UCEC	PEBP1	Macrophage	0.0258122	0.735296	0.873418	5037
UCEC	PEBP1	Monocyte	0.108806	0.15296	0.61468	5037
UCEC	PEBP1	NK	-0.0787681	0.301539	0.538864	5037
UCEC	PEBP1	NKT	0.0226243	0.766984	0.9203	5037
UCEC	PEBP1	Neutrophil	0.0785127	0.303114	0.518852	5037
UCEC	PEBP1	Tfh	-0.11411	0.133805	0.276163	5037
UCEC	PEBP1	Th1	-0.121564	0.110062	0.248113	5037
UCEC	PEBP1	Th17	0.061037	0.423667	0.668959	5037
UCEC	PEBP1	Th2	-0.0600571	0.43116	0.629019	5037
UCEC	PEBP1	Tr1	-0.0657018	0.389045	0.808168	5037
UCEC	PEBP1	iTreg	-0.000461342	0.995179	0.998266	5037
UCEC	PEBP1	nTreg	-0.0132181	0.862565	0.94665	5037
UCEC	YY1	Bcell	0.0363905	0.63356	0.835795	7528
UCEC	YY1	CD4_T	-0.132568	0.0811948	0.242241	7528
UCEC	YY1	CD4_naive	-0.0110363	0.885079	0.999929	7528
UCEC	YY1	CD8_T	-0.102221	0.179535	0.40396	7528
UCEC	YY1	CD8_naive	0.102571	0.178042	0.373163	7528
UCEC	YY1	Central_memory	-0.0239872	0.753387	0.873032	7528
UCEC	YY1	Cytotoxic	-0.0898133	0.238572	0.446911	7528
UCEC	YY1	DC	-0.0206641	0.786666	0.929179	7528
UCEC	YY1	Effector_memory	0.140264	0.0648908	0.553299	7528
UCEC	YY1	Exhausted	-0.018612	0.807417	0.878216	7528
UCEC	YY1	Gamma_delta	-0.159291	0.0357753	0.468935	7528
UCEC	YY1	InfiltrationScore	-0.177459	0.0191503	0.077298	7528
UCEC	YY1	MAIT	-0.116174	0.126869	0.728115	7528
UCEC	YY1	Macrophage	-0.112698	0.138714	0.347166	7528
UCEC	YY1	Monocyte	-0.0350997	0.645659	0.903216	7528
UCEC	YY1	NK	-0.173201	0.0222827	0.103146	7528
UCEC	YY1	NKT	-0.0457827	0.548588	0.816557	7528
UCEC	YY1	Neutrophil	0.108307	0.154863	0.333095	7528
UCEC	YY1	Tfh	-0.0853503	0.262809	0.443153	7528
UCEC	YY1	Th1	0.04243	0.578275	0.7477	7528
UCEC	YY1	Th17	0.0744755	0.32873	0.583838	7528
UCEC	YY1	Th2	-0.165924	0.0286617	0.0998516	7528
UCEC	YY1	Tr1	-0.05731	0.452569	0.838664	7528
UCEC	YY1	iTreg	0.111101	0.144431	0.366511	7528
UCEC	YY1	nTreg	0.109429	0.150609	0.421983	7528
UCS	PEBP1	Bcell	0.0467831	0.729667	0.999065	5037
UCS	PEBP1	CD4_T	-0.0531877	0.694364	0.940995	5037
UCS	PEBP1	CD4_naive	0.0893473	0.508653	0.76083	5037
UCS	PEBP1	CD8_T	0.0784091	0.56208	0.980342	5037
UCS	PEBP1	CD8_naive	0.13375	0.321252	0.601306	5037
UCS	PEBP1	Central_memory	-0.110429	0.413497	0.854782	5037
UCS	PEBP1	Cytotoxic	-0.0145569	0.914414	0.993897	5037
UCS	PEBP1	DC	-0.196415	0.143097	0.585478	5037
UCS	PEBP1	Effector_memory	-0.107806	0.424746	0.778466	5037
UCS	PEBP1	Exhausted	-0.0596928	0.659155	0.895996	5037
UCS	PEBP1	Gamma_delta	0.119622	0.375454	0.969345	5037
UCS	PEBP1	InfiltrationScore	-0.259439	0.0513145	0.441484	5037
UCS	PEBP1	MAIT	-0.347806	0.00802464	0.863396	5037
UCS	PEBP1	Macrophage	-0.132817	0.324672	0.779026	5037
UCS	PEBP1	Monocyte	-0.208622	0.119385	0.999971	5037
UCS	PEBP1	NK	-0.140968	0.295589	0.841182	5037
UCS	PEBP1	NKT	-0.0112976	0.933527	0.990178	5037
UCS	PEBP1	Neutrophil	-0.0381623	0.778068	0.992648	5037
UCS	PEBP1	Tfh	0.0191868	0.887348	0.976894	5037
UCS	PEBP1	Th1	-0.0728552	0.59018	0.889207	5037
UCS	PEBP1	Th17	-0.024212	0.858116	0.966493	5037
UCS	PEBP1	Th2	0.160309	0.23357	0.914729	5037
UCS	PEBP1	Tr1	-0.000432295	0.997454	0.999698	5037
UCS	PEBP1	iTreg	0.0351679	0.795088	0.979321	5037
UCS	PEBP1	nTreg	-0.0367374	0.786154	0.973508	5037
UCS	YY1	Bcell	-0.112759	0.40365	0.999065	7528
UCS	YY1	CD4_T	-0.0132888	0.921845	0.987252	7528
UCS	YY1	CD4_naive	0.105592	0.434373	0.718125	7528
UCS	YY1	CD8_T	0.0671939	0.619453	0.983094	7528
UCS	YY1	CD8_naive	0.225911	0.0910812	0.303439	7528
UCS	YY1	Central_memory	-0.170312	0.205292	0.739793	7528
UCS	YY1	Cytotoxic	-0.143786	0.285942	0.908045	7528
UCS	YY1	DC	-0.211876	0.113602	0.545722	7528
UCS	YY1	Effector_memory	-0.0750186	0.57916	0.860694	7528
UCS	YY1	Exhausted	0.0285157	0.833229	0.955156	7528
UCS	YY1	Gamma_delta	0.0418757	0.757104	0.984238	7528
UCS	YY1	InfiltrationScore	-0.054902	0.685019	0.933667	7528
UCS	YY1	MAIT	-0.205961	0.12428	0.917802	7528
UCS	YY1	Macrophage	-0.123191	0.361268	0.801967	7528
UCS	YY1	Monocyte	0.0953647	0.480408	0.999971	7528
UCS	YY1	NK	0.0405822	0.764388	0.973637	7528
UCS	YY1	NKT	-0.0369888	0.784726	0.966581	7528
UCS	YY1	Neutrophil	0.230368	0.0847119	0.700488	7528
UCS	YY1	Tfh	-0.110227	0.414357	0.825623	7528
UCS	YY1	Th1	-0.110953	0.411272	0.808878	7528
UCS	YY1	Th17	-0.0808362	0.550001	0.857188	7528
UCS	YY1	Th2	0.0513726	0.704307	0.97806	7528
UCS	YY1	Tr1	0.0413341	0.760151	0.996492	7528
UCS	YY1	iTreg	-0.0450538	0.739299	0.968075	7528
UCS	YY1	nTreg	-0.033657	0.803712	0.974574	7528
UVM	PEBP1	Bcell	-0.110178	0.330595	0.519189	5037
UVM	PEBP1	CD4_T	0.0541463	0.633343	0.883823	5037
UVM	PEBP1	CD4_naive	0.0045891	0.967774	0.987228	5037
UVM	PEBP1	CD8_T	-0.0584533	0.606529	0.739689	5037
UVM	PEBP1	CD8_naive	0.256779	0.0214907	0.21443	5037
UVM	PEBP1	Central_memory	-0.0376116	0.74047	0.937687	5037
UVM	PEBP1	Cytotoxic	0.00806447	0.9434	0.971507	5037
UVM	PEBP1	DC	0.0327167	0.773271	0.903786	5037
UVM	PEBP1	Effector_memory	0.020673	0.855572	0.911513	5037
UVM	PEBP1	Exhausted	-0.00466426	0.967246	0.981756	5037
UVM	PEBP1	Gamma_delta	-0.0592855	0.601406	0.81806	5037
UVM	PEBP1	InfiltrationScore	-0.059038	0.602928	0.817556	5037
UVM	PEBP1	MAIT	0.172768	0.125396	0.240871	5037
UVM	PEBP1	Macrophage	-0.106505	0.347066	0.67961	5037
UVM	PEBP1	Monocyte	0.0967129	0.393429	0.809933	5037
UVM	PEBP1	NK	0.0441069	0.697658	0.88013	5037
UVM	PEBP1	NKT	-0.0798632	0.481307	0.680633	5037
UVM	PEBP1	Neutrophil	-0.156484	0.165696	0.280991	5037
UVM	PEBP1	Tfh	-0.0380272	0.737705	0.88197	5037
UVM	PEBP1	Th1	0.113795	0.314867	0.457752	5037
UVM	PEBP1	Th17	-0.149056	0.186967	0.359921	5037
UVM	PEBP1	Th2	0.0359016	0.75188	0.874782	5037
UVM	PEBP1	Tr1	0.0776629	0.493508	0.835929	5037
UVM	PEBP1	iTreg	0.12398	0.273213	0.475231	5037
UVM	PEBP1	nTreg	0.0597153	0.598767	0.78117	5037
UVM	YY1	Bcell	-0.162359	0.15018	0.301361	7528
UVM	YY1	CD4_T	0.279183	0.0121461	0.107833	7528
UVM	YY1	CD4_naive	-0.136234	0.228216	0.484011	7528
UVM	YY1	CD8_T	0.47337	9.22679e-06	0.000110172	7528
UVM	YY1	CD8_naive	0.0440514	0.69802	0.904077	7528
UVM	YY1	Central_memory	0.252396	0.0239037	0.3725	7528
UVM	YY1	Cytotoxic	0.410725	0.000154174	0.00148007	7528
UVM	YY1	DC	0.246331	0.0276204	0.146983	7528
UVM	YY1	Effector_memory	0.304466	0.00603484	0.0303145	7528
UVM	YY1	Exhausted	0.461067	1.6769e-05	0.000159439	7528
UVM	YY1	Gamma_delta	0.294573	0.00799209	0.0911332	7528
UVM	YY1	InfiltrationScore	0.302832	0.00632557	0.0483325	7528
UVM	YY1	MAIT	0.324483	0.00331952	0.0135845	7528
UVM	YY1	Macrophage	0.196775	0.0802115	0.338613	7528
UVM	YY1	Monocyte	-0.179921	0.110266	0.542412	7528
UVM	YY1	NK	0.186367	0.0978801	0.315856	7528
UVM	YY1	NKT	-0.439915	4.445e-05	0.00515701	7528
UVM	YY1	Neutrophil	-0.472243	9.75497e-06	7.0416e-05	7528
UVM	YY1	Tfh	0.276603	0.013001	0.0842399	7528
UVM	YY1	Th1	0.399512	0.000241381	0.00137392	7528
UVM	YY1	Th17	-0.375607	0.00059633	0.00518106	7528
UVM	YY1	Th2	0.371007	0.000704216	0.00825653	7528
UVM	YY1	Tr1	-0.00520724	0.963436	0.991144	7528
UVM	YY1	iTreg	0.520146	7.61306e-07	5.3222e-05	7528
UVM	YY1	nTreg	0.246704	0.0273783	0.165329	7528
