# Supplementary material for: Cross-Talks between RKIP and YY1 through a Multilevel Bioinformatics Pan-Cancer Analysis
Source: Preprints.org preprint supplement (doi:10.20944/preprints202309.0467.v1), 2023-09-07
Supplement: Supplementary file 5 [file Table S2.xlsx]

## Sheet: Table S2
cancertype	symbol	stagetype	stage1	stage2	stage3	stage4	pval	fdr	entrez
ACC	PEBP1	pathologic_stage	48000/9	55000/37	55000/16	45000/15	0.49311	0.730279	5037
ACC	YY1	pathologic_stage	1200/9	1200/37	1400/16	1400/15	0.0448362	0.311844	7528
BLCA	PEBP1	pathologic_stage		9200/130	9200/140	9400/134	0.646537	0.784206	5037
BLCA	YY1	pathologic_stage		1300/130	1300/140	1300/134	0.841116	0.907728	7528
BRCA	PEBP1	pathologic_stage	7400/182	7200/626	7300/252	7600/20	0.276772	0.49178	5037
BRCA	YY1	pathologic_stage	1400/182	1400/626	1400/252	1300/20	0.185998	0.399451	7528
CESC	PEBP1	clinical_stage	5200/162	4800/69	4400/46	4400/22	0.115355	0.602888	5037
CESC	YY1	clinical_stage	1500/162	1500/69	1500/46	1500/22	0.978586	0.995285	7528
CHOL	PEBP1	pathologic_stage	9600/19	11000/9		9000/7	0.859253	0.99976	5037
CHOL	YY1	pathologic_stage	880/19	880/9		980/7	0.847746	0.99976	7528
COAD	PEBP1	pathologic_stage	6200/45	6100/111	5900/81	5800/39	0.592032	0.779585	5037
COAD	YY1	pathologic_stage	1300/45	1300/111	1300/81	1300/39	0.975734	0.987325	7528
DLBC	PEBP1	clinical_stage	6500/8	5000/17	5200/5	7200/12	0.304141	0.994036	5037
DLBC	YY1	clinical_stage	1300/8	1500/17	1400/5	1500/12	0.630735	0.994036	7528
ESCA	PEBP1	pathologic_stage	2300/19	2500/78	2900/56	2500/9	0.207135	0.501692	5037
ESCA	PEBP1	clinical_stage		2600/30	2200/21	2300/11	0.573271	0.888865	5037
ESCA	YY1	pathologic_stage	1800/19	2100/78	1900/56	1900/9	0.0560578	0.297797	7528
ESCA	YY1	clinical_stage		2200/30	2100/21	2000/11	0.294619	0.780784	7528
HNSC	PEBP1	pathologic_stage	3700/27	3800/74	3900/81	4000/268	0.840305	0.92568	5037
HNSC	PEBP1	clinical_stage	4600/20	3700/98	3900/105	3900/285	0.486589	0.743103	5037
HNSC	YY1	pathologic_stage	1400/27	1500/74	1500/81	1600/268	0.284718	0.580486	7528
HNSC	YY1	clinical_stage	1400/20	1500/98	1600/105	1500/285	0.560101	0.783996	7528
KICH	PEBP1	pathologic_stage	15000/21	14000/25	15000/14	9900/6	0.273558	0.603188	5037
KICH	YY1	pathologic_stage	1200/21	1100/25	1100/14	1000/6	0.33906	0.651253	7528
KIRC	PEBP1	pathologic_stage	11000/268	11000/57	11000/123	11000/84	0.34945	0.4702	5037
KIRC	YY1	pathologic_stage	1200/268	1100/57	1200/123	1200/84	0.429634	0.546238	7528
KIRP	PEBP1	pathologic_stage	15000/172	14000/22	14000/52	11000/15	0.0827599	0.2284	5037
KIRP	PEBP1	clinical_stage	16000/140	12000/21	15000/29	12000/11	0.0389478	0.173579	5037
KIRP	YY1	pathologic_stage	800/172	850/22	1000/52	1100/15	0.00012723	0.00322553	7528
KIRP	YY1	clinical_stage	800/140	850/21	1100/29	1200/11	2.2537e-05	0.00319079	7528
LIHC	PEBP1	pathologic_stage	40000/173	33000/87	32000/85	32000/5	0.00381273	0.105369	5037
LIHC	YY1	pathologic_stage	1000/173	1000/87	1100/85	1100/5	0.152097	0.465802	7528
LUAD	PEBP1	pathologic_stage	5100/277	4800/122	4500/84	4800/26	0.160835	0.454718	5037
LUAD	YY1	pathologic_stage	1400/277	1400/122	1400/84	1500/26	0.755515	0.890848	7528
LUSC	PEBP1	pathologic_stage	4100/245	4300/162	4400/84	4600/7	0.46349	0.734614	5037
LUSC	YY1	pathologic_stage	1700/245	1800/162	1800/84	1900/7	0.0190638	0.226842	7528
MESO	PEBP1	pathologic_stage	5600/10	6300/16	6400/45	6100/16	0.661902	0.891227	5037
MESO	YY1	pathologic_stage	1200/10	1000/16	1000/45	1100/16	0.198228	0.666257	7528
OV	PEBP1	clinical_stage		4600/22	4900/246	4600/38	0.510611	0.778841	5037
OV	YY1	clinical_stage		2100/22	2000/246	2000/38	0.62333	0.833608	7528
PAAD	PEBP1	pathologic_stage	7300/21	5000/147		5700/5	0.0130639	0.272331	5037
PAAD	YY1	pathologic_stage	960/21	1100/147		1300/5	0.0149912	0.272331	7528
READ	PEBP1	pathologic_stage	5200/12	5200/26	6000/33	5800/13	0.593731	0.872552	5037
READ	YY1	pathologic_stage	1300/12	1300/26	1400/33	1400/13	0.775625	0.929447	7528
SKCM	PEBP1	pathologic_stage	6900/78	7900/140	6900/171	7600/24	0.030285	0.162596	5037
SKCM	YY1	pathologic_stage	1000/78	870/140	930/171	950/24	0.0013175	0.0241087	7528
STAD	PEBP1	pathologic_stage	4100/57	3900/123	3700/171	3500/41	0.304424	0.574407	5037
STAD	YY1	pathologic_stage	1700/57	1700/123	1700/171	1700/41	0.943777	0.970752	7528
TGCT	PEBP1	pathologic_stage	7300/56	9200/12	8300/14		0.0636008	0.17945	5037
TGCT	PEBP1	clinical_stage	7500/52	8500/17	8300/15		0.289964	0.527227	5037
TGCT	PEBP1	igcccg_stage	7900/32 (stage good)	7800/9 (stage intermediate)			0.745179	0.960178	5037
TGCT	YY1	pathologic_stage	1900/56	1700/12	1800/14		0.457955	0.60717	7528
TGCT	YY1	clinical_stage	1800/52	1700/17	1800/15		0.470686	0.676067	7528
TGCT	YY1	igcccg_stage	1800/32 (stage good)	1700/9 (stage intermediate)			0.81648	0.975095	7528
THCA	PEBP1	pathologic_stage	22000/288	25000/51	22000/111	20000/57	0.00307616	0.0147236	5037
THCA	YY1	pathologic_stage	1500/288	1600/51	1500/111	1500/57	0.956593	0.969901	7528
THYM	PEBP1	masaoka_stage		6700/61	6300/15	7200/6	0.511271	0.900013	5037
THYM	YY1	masaoka_stage		1400/61	1300/15	1400/6	0.646069	0.940012	7528
UCEC	PEBP1	clinical_stage	10000/98	11000/24	9500/45	9300/10	0.6483	0.918978	5037
UCEC	YY1	clinical_stage	1400/98	1500/24	1500/45	1600/10	0.311965	0.804866	7528
UCS	PEBP1	clinical_stage	6800/22	5400/5	5200/20	5700/10	0.584382	0.811189	5037
UCS	YY1	clinical_stage	1400/22	1500/5	1400/20	1200/10	0.169737	0.51816	7528
UVM	PEBP1	pathologic_stage		17000/39	15000/36		0.180829	0.982061	5037
UVM	PEBP1	clinical_stage		17000/36	15000/40		0.0121328	0.368333	5037
UVM	YY1	pathologic_stage		690/39	680/36		0.845381	0.99929	7528
UVM	YY1	clinical_stage		690/36	690/40		0.987624	0.996978	7528
