# Supplementary material for: Cross-Talks between RKIP and YY1 through a Multilevel Bioinformatics Pan-Cancer Analysis
Source: Preprints.org preprint supplement (doi:10.20944/preprints202309.0467.v1), 2023-09-07
Supplement: Supplementary file 7 [file Table S3.xlsx]

## Sheet: Table S3
cancertype	symbol	pval	Subtype1	Subtype2	Subtype3	Subtype4	Subtype5	Subtype6	entrez
BLCA	PEBP1	0.069447	Non-Papillary (8600/148)	Papillary (10000/66)					0
BLCA	YY1	0.0495644	Non-Papillary (1400/148)	Papillary (1300/66)					0
BRCA	PEBP1	0.747221	Basal (6900/140)	Her2 (6800/67)	LumA (7100/420)	LumB (7200/193)	Normal_like (6700/23)		0
BRCA	YY1	9.7011e-09	Basal (1700/140)	Her2 (1600/67)	LumA (1500/420)	LumB (1600/193)	Normal_like (1300/23)		0
COAD	PEBP1	0.147443	MSI-H (5200/6)	MSI-L (7700/6)	MSS (6200/15)				0
COAD	YY1	0.615625	MSI-H (1300/6)	MSI-L (1400/6)	MSS (1300/15)				0
GBM	PEBP1	0.0138126	Classical (8600/43)	G-CIMP (7500/8)	Mesenchymal (8400/55)	Neural (11000/28)	Proneural (8400/31)		0
GBM	YY1	0.0469524	Classical (970/43)	G-CIMP (1100/8)	Mesenchymal (980/55)	Neural (890/28)	Proneural (900/31)		0
HNSC	PEBP1	0.279044	Negative (3700/66)	Positive (4000/23)					0
HNSC	YY1	0.854991	Negative (1400/66)	Positive (1400/23)					0
KIRC	PEBP1	2.76312e-30	1 (11000/147)	2 (12000/90)	3 (7100/94)	4 (14000/86)			0
KIRC	YY1	3.4919e-05	1 (1300/147)	2 (1100/90)	3 (1200/94)	4 (1200/86)			0
LUAD	PEBP1	5.6118e-05	1 (6800/22)	2 (5500/32)	3 (4500/51)	4 (5000/32)	5 (5300/52)	6 (4100/41)	0
LUAD	YY1	0.00167903	1 (1400/22)	2 (1700/32)	3 (1500/51)	4 (1300/32)	5 (1400/52)	6 (1400/41)	0
LUSC	PEBP1	0.00074134	basal (3700/43)	classical (4300/65)	primitive (5400/27)	secretory (4100/44)			0
LUSC	YY1	0.00955627	basal (1900/43)	classical (1800/65)	primitive (1600/27)	secretory (1600/44)			0
STAD	PEBP1	0.851198	CIN (4000/138)	EBV (4100/25)	GS (3800/54)	MSI (3800/60)			0
STAD	YY1	0.00128214	CIN (1700/138)	EBV (1600/25)	GS (1500/54)	MSI (1600/60)			0
