# Supplementary material for: Cross-Talks between RKIP and YY1 through a Multilevel Bioinformatics Pan-Cancer Analysis
Source: Preprints.org preprint supplement (doi:10.20944/preprints202309.0467.v1), 2023-09-07
Supplement: Supplementary file 9 [file Table S4.xlsx]

## Sheet: Table S4
cancertype	symbol	sur_type	hr_categorical(H/L)	coxp_categorical	logrankp	higher_risk_of_death	entrez
ACC	PEBP1	OS	0.81425	0.591671	0.59268	Lower expr.	0
ACC	PEBP1	PFS	0.798928	0.465293	0.465924	Lower expr.	0
ACC	PEBP1	DSS	0.819231	0.616719	0.61795	Lower expr.	0
ACC	PEBP1	DFI	0.641976	0.479988	0.476416	Lower expr.	0
ACC	YY1	OS	1.10488	0.79328	0.793093	Higher expr.	0
ACC	YY1	PFS	1.35413	0.324357	0.324848	Higher expr.	0
ACC	YY1	DSS	0.998583	0.997127	0.997056	Lower expr.	0
ACC	YY1	DFI	1.94767	0.288596	0.279835	Higher expr.	0
BLCA	PEBP1	OS	0.889949	0.439953	0.439876	Lower expr.	0
BLCA	PEBP1	PFS	0.929575	0.583385	0.582724	Lower expr.	0
BLCA	PEBP1	DSS	0.765746	0.148665	0.147697	Lower expr.	0
BLCA	PEBP1	DFI	0.726709	0.383344	0.381389	Lower expr.	0
BLCA	YY1	OS	1.01462	0.923004	0.923381	Higher expr.	0
BLCA	YY1	PFS	1.08462	0.540588	0.540992	Higher expr.	0
BLCA	YY1	DSS	1.0612	0.744835	0.745098	Higher expr.	0
BLCA	YY1	DFI	1.38899	0.373511	0.371379	Higher expr.	0
BRCA	PEBP1	OS	1.04606	0.781038	0.781284	Higher expr.	0
BRCA	PEBP1	PFS	1.057	0.69203	0.692595	Higher expr.	0
BRCA	PEBP1	DSS	1.17105	0.469883	0.470427	Higher expr.	0
BRCA	PEBP1	DFI	1.02553	0.908135	0.908133	Higher expr.	0
BRCA	YY1	OS	0.872179	0.403455	0.404164	Lower expr.	0
BRCA	YY1	PFS	1.00359	0.979757	0.977977	Higher expr.	0
BRCA	YY1	DSS	0.912837	0.678115	0.679589	Lower expr.	0
BRCA	YY1	DFI	1.20676	0.395322	0.394636	Higher expr.	0
CESC	PEBP1	OS	0.812999	0.382134	0.381365	Lower expr.	0
CESC	PEBP1	PFS	0.854561	0.465506	0.465461	Lower expr.	0
CESC	PEBP1	DSS	0.799381	0.410425	0.409027	Lower expr.	0
CESC	PEBP1	DFI	0.966141	0.930085	0.930089	Lower expr.	0
CESC	YY1	OS	0.805725	0.3573	0.356843	Lower expr.	0
CESC	YY1	PFS	0.840123	0.415268	0.414609	Lower expr.	0
CESC	YY1	DSS	0.892803	0.674356	0.675093	Lower expr.	0
CESC	YY1	DFI	1.33964	0.468763	0.467772	Higher expr.	0
CHOL	PEBP1	OS	1.25033	0.650249	0.649621	Higher expr.	0
CHOL	PEBP1	PFS	1.05175	0.906284	0.906274	Higher expr.	0
CHOL	PEBP1	DSS	1.23399	0.688961	0.688461	Higher expr.	0
CHOL	PEBP1	DFI	0.650569	0.506439	0.503212	Lower expr.	0
CHOL	YY1	OS	1.52222	0.376776	0.373439	Higher expr.	0
CHOL	YY1	PFS	1.09699	0.82935	0.829291	Higher expr.	0
CHOL	YY1	DSS	1.59235	0.35559	0.351437	Higher expr.	0
CHOL	YY1	DFI	0.876545	0.848829	0.848722	Lower expr.	0
COAD	PEBP1	OS	0.742426	0.219841	0.218206	Lower expr.	0
COAD	PEBP1	PFS	0.828152	0.332184	0.329855	Lower expr.	0
COAD	PEBP1	DSS	0.566525	0.0985646	0.094242	Lower expr.	0
COAD	PEBP1	DFI	1.2828	0.63543	0.634607	Higher expr.	0
COAD	YY1	OS	0.981298	0.937816	0.937815	Lower expr.	0
COAD	YY1	PFS	0.824779	0.321941	0.321159	Lower expr.	0
COAD	YY1	DSS	0.889752	0.727209	0.727062	Lower expr.	0
COAD	YY1	DFI	0.375608	0.0717163	0.0614779	Lower expr.	0
DLBC	PEBP1	OS	0.665094	0.577664	0.57507	Lower expr.	0
DLBC	PEBP1	PFS	0.555539	0.284382	0.277579	Lower expr.	0
DLBC	PEBP1	DSS	1.05659	0.956331	0.956326	Higher expr.	0
DLBC	PEBP1	DFI	0.517657	0.590942	0.58423	Lower expr.	0
DLBC	YY1	OS	0.443465	0.324019	0.311347	Lower expr.	0
DLBC	YY1	PFS	1.17466	0.760379	0.760151	Higher expr.	0
DLBC	YY1	DSS	0.360476	0.377018	0.356446	Lower expr.	0
DLBC	YY1	DFI	0.91612	0.944022	0.944006	Lower expr.	0
ESCA	PEBP1	OS	1.1218	0.616716	0.616525	Higher expr.	0
ESCA	PEBP1	PFS	1.20832	0.318071	0.316654	Higher expr.	0
ESCA	PEBP1	DSS	1.02899	0.918527	0.917759	Higher expr.	0
ESCA	PEBP1	DFI	1.12899	0.776987	0.776866	Higher expr.	0
ESCA	YY1	OS	1.024	0.918001	0.918427	Higher expr.	0
ESCA	YY1	PFS	1.43851	0.0550247	0.0535292	Higher expr.	0
ESCA	YY1	DSS	1.07021	0.808262	0.808928	Higher expr.	0
ESCA	YY1	DFI	2.47583	0.0583761	0.0505948	Higher expr.	0
GBM	PEBP1	OS	0.968004	0.85154	0.865541	Lower expr.	0
GBM	PEBP1	PFS	1.01813	0.913977	0.909016	Higher expr.	0
GBM	PEBP1	DSS	0.943445	0.752559	0.768146	Lower expr.	0
GBM	YY1	OS	0.911167	0.593193	0.588486	Lower expr.	0
GBM	YY1	PFS	0.876309	0.42831	0.420212	Lower expr.	0
GBM	YY1	DSS	0.910974	0.613787	0.610368	Lower expr.	0
HNSC	PEBP1	OS	0.99849	0.991112	0.990753	Lower expr.	0
HNSC	PEBP1	PFS	1.10628	0.406965	0.406586	Higher expr.	0
HNSC	PEBP1	DSS	0.896654	0.538403	0.538002	Lower expr.	0
HNSC	PEBP1	DFI	1.23089	0.58972	0.58911	Higher expr.	0
HNSC	YY1	OS	1.36223	0.0234953	0.0229664	Higher expr.	0
HNSC	YY1	PFS	1.23887	0.0798688	0.0793321	Higher expr.	0
HNSC	YY1	DSS	1.56156	0.0125746	0.011886	Higher expr.	0
HNSC	YY1	DFI	0.766323	0.500372	0.499118	Lower expr.	0
KICH	PEBP1	OS	0.3342	0.122802	0.105388	Lower expr.	0
KICH	PEBP1	PFS	0.232273	0.0299193	0.0184048	Lower expr.	0
KICH	PEBP1	DSS	0.252783	0.101509	0.0773507	Lower expr.	0
KICH	PEBP1	DFI	2.95361e-10	0.999305	0.0211234	Lower expr.	0
KICH	YY1	OS	0.73888	0.652208	0.650974	Lower expr.	0
KICH	YY1	PFS	0.726602	0.585526	0.583933	Lower expr.	0
KICH	YY1	DSS	1.20621	0.806238	0.805961	Higher expr.	0
KICH	YY1	DFI	0.329037	0.364362	0.339914	Lower expr.	0
KIRC	PEBP1	OS	0.808962	0.162069	0.161342	Lower expr.	0
KIRC	PEBP1	PFS	0.800964	0.0985285	0.0978206	Lower expr.	0
KIRC	PEBP1	DSS	0.752688	0.140909	0.139623	Lower expr.	0
KIRC	PEBP1	DFI	0.867768	0.78453	0.784356	Lower expr.	0
KIRC	YY1	OS	0.683054	0.0123425	0.0118211	Lower expr.	0
KIRC	YY1	PFS	0.83558	0.181838	0.180868	Lower expr.	0
KIRC	YY1	DSS	0.619999	0.0138357	0.0129424	Lower expr.	0
KIRC	YY1	DFI	1.0404	0.939413	0.939409	Higher expr.	0
KIRP	PEBP1	OS	0.522432	0.0386926	0.035424	Lower expr.	0
KIRP	PEBP1	PFS	0.794658	0.3293	0.328007	Lower expr.	0
KIRP	PEBP1	DSS	0.361868	0.0151812	0.0112967	Lower expr.	0
KIRP	PEBP1	DFI	0.943775	0.877314	0.876428	Lower expr.	0
KIRP	YY1	OS	3.1518	0.00103485	0.000543607	Higher expr.	0
KIRP	YY1	PFS	2.05867	0.00329514	0.00269258	Higher expr.	0
KIRP	YY1	DSS	4.01513	0.00257179	0.00110885	Higher expr.	0
KIRP	YY1	DFI	2.29663	0.0282241	0.0241263	Higher expr.	0
LAML	PEBP1	OS	0.912502	0.640381	0.643432	Lower expr.	0
LAML	YY1	OS	0.765346	0.173156	0.17274	Lower expr.	0
LGG	PEBP1	OS	0.775534	0.141811	0.145896	Lower expr.	0
LGG	PEBP1	PFS	0.926873	0.575059	0.565764	Lower expr.	0
LGG	PEBP1	DSS	0.763899	0.13904	0.1431	Lower expr.	0
LGG	PEBP1	DFI	1.09128	0.831295	0.82288	Higher expr.	0
LGG	YY1	OS	1.08039	0.660151	0.647194	Higher expr.	0
LGG	YY1	PFS	1.12811	0.376325	0.36848	Higher expr.	0
LGG	YY1	DSS	1.07095	0.709876	0.696222	Higher expr.	0
LGG	YY1	DFI	1.02009	0.961746	0.962995	Higher expr.	0
LIHC	PEBP1	OS	0.674993	0.0270763	0.0261977	Lower expr.	0
LIHC	PEBP1	PFS	0.733157	0.019984	0.0193561	Lower expr.	0
LIHC	PEBP1	DSS	0.634095	0.0467451	0.0449649	Lower expr.	0
LIHC	PEBP1	DFI	0.829146	0.258856	0.256468	Lower expr.	0
LIHC	YY1	OS	1.16852	0.377136	0.377214	Higher expr.	0
LIHC	YY1	PFS	1.10819	0.44013	0.44017	Higher expr.	0
LIHC	YY1	DSS	1.01371	0.951905	0.952563	Higher expr.	0
LIHC	YY1	DFI	0.87988	0.440217	0.440692	Lower expr.	0
LUAD	PEBP1	OS	0.561555	0.000125651	0.000101266	Lower expr.	0
LUAD	PEBP1	PFS	0.657313	0.000773749	0.000711102	Lower expr.	0
LUAD	PEBP1	DSS	0.532888	0.00103353	0.000855615	Lower expr.	0
LUAD	PEBP1	DFI	0.620001	0.0246687	0.0233761	Lower expr.	0
LUAD	YY1	OS	1.25711	0.125418	0.124388	Higher expr.	0
LUAD	YY1	PFS	1.19931	0.143355	0.143143	Higher expr.	0
LUAD	YY1	DSS	1.62193	0.0137625	0.0128513	Higher expr.	0
LUAD	YY1	DFI	1.17774	0.439904	0.439735	Higher expr.	0
LUSC	PEBP1	OS	1.14935	0.315435	0.314343	Higher expr.	0
LUSC	PEBP1	PFS	1.13786	0.308921	0.30774	Higher expr.	0
LUSC	PEBP1	DSS	1.09631	0.668553	0.667918	Higher expr.	0
LUSC	PEBP1	DFI	1.4543	0.151162	0.148771	Higher expr.	0
LUSC	YY1	OS	0.939488	0.651441	0.65086	Lower expr.	0
LUSC	YY1	PFS	0.954181	0.71066	0.710279	Lower expr.	0
LUSC	YY1	DSS	1.15325	0.510249	0.509862	Higher expr.	0
LUSC	YY1	DFI	0.936757	0.799629	0.799477	Lower expr.	0
MESO	PEBP1	OS	0.544773	0.0140726	0.0128135	Lower expr.	0
MESO	PEBP1	PFS	0.62067	0.0438898	0.0421479	Lower expr.	0
MESO	PEBP1	DSS	0.615533	0.123282	0.120392	Lower expr.	0
MESO	PEBP1	DFI	1.83282e-10	0.999344	0.0100633	Lower expr.	0
MESO	YY1	OS	0.918218	0.720555	0.719016	Lower expr.	0
MESO	YY1	PFS	0.911226	0.684803	0.684471	Lower expr.	0
MESO	YY1	DSS	1.13227	0.684805	0.686779	Higher expr.	0
MESO	YY1	DFI	1.08123	0.929171	0.929155	Higher expr.	0
OV	PEBP1	OS	0.798294	0.129766	0.128802	Lower expr.	0
OV	PEBP1	PFS	0.850624	0.21426	0.21347	Lower expr.	0
OV	PEBP1	DSS	0.807907	0.186833	0.18598	Lower expr.	0
OV	PEBP1	DFI	0.745389	0.136559	0.134197	Lower expr.	0
OV	YY1	OS	0.930139	0.626087	0.631229	Lower expr.	0
OV	YY1	PFS	0.77985	0.0602983	0.0600354	Lower expr.	0
OV	YY1	DSS	0.917741	0.596086	0.602448	Lower expr.	0
OV	YY1	DFI	0.688163	0.0638988	0.0635482	Lower expr.	0
PAAD	PEBP1	OS	0.53471	0.00316062	0.00271866	Lower expr.	0
PAAD	PEBP1	PFS	0.630206	0.0117866	0.0111017	Lower expr.	0
PAAD	PEBP1	DSS	0.518899	0.00629773	0.00544122	Lower expr.	0
PAAD	PEBP1	DFI	0.512521	0.11745	0.111208	Lower expr.	0
PAAD	YY1	OS	2.02331	0.00107076	0.000856167	Higher expr.	0
PAAD	YY1	PFS	1.8755	0.000723749	0.000600797	Higher expr.	0
PAAD	YY1	DSS	2.17176	0.00161465	0.00124352	Higher expr.	0
PAAD	YY1	DFI	2.47073	0.0347868	0.0294105	Higher expr.	0
PCPG	PEBP1	OS	0.355528	0.206007	0.186075	Lower expr.	0
PCPG	PEBP1	PFS	0.539744	0.1476	0.141549	Lower expr.	0
PCPG	PEBP1	DSS	0.216405	0.162873	0.124314	Lower expr.	0
PCPG	PEBP1	DFI	0.877763	0.8965	0.896428	Lower expr.	0
PCPG	YY1	OS	7.57043	0.0585766	0.0256942	Higher expr.	0
PCPG	YY1	PFS	3.22476	0.0133874	0.00894685	Higher expr.	0
PCPG	YY1	DSS	5.53116	0.119044	0.0790465	Higher expr.	0
PCPG	YY1	DFI	6.5194e+08	0.998674	0.0366614	Higher expr.	0
PRAD	PEBP1	OS	0.421277	0.210638	0.196713	Lower expr.	0
PRAD	PEBP1	PFS	0.908699	0.63605	0.636055	Lower expr.	0
PRAD	PEBP1	DSS	0.263392	0.233344	0.20007	Lower expr.	0
PRAD	PEBP1	DFI	0.675966	0.288251	0.285365	Lower expr.	0
PRAD	YY1	OS	1.03085	0.962857	0.962856	Higher expr.	0
PRAD	YY1	PFS	0.830741	0.361469	0.360907	Lower expr.	0
PRAD	YY1	DSS	3.67389	0.246485	0.215008	Higher expr.	0
PRAD	YY1	DFI	0.898367	0.766505	0.766364	Lower expr.	0
READ	PEBP1	OS	1.27831	0.617055	0.622081	Higher expr.	0
READ	PEBP1	PFS	0.963915	0.920815	0.910803	Lower expr.	0
READ	PEBP1	DSS	0.89219	0.900805	0.900752	Lower expr.	0
READ	PEBP1	DFI	0.400116	0.414126	0.398159	Lower expr.	0
READ	YY1	OS	1.28877	0.595421	0.585449	Higher expr.	0
READ	YY1	PFS	1.36881	0.401182	0.391721	Higher expr.	0
READ	YY1	DSS	4.09138	0.209355	0.174205	Higher expr.	0
READ	YY1	DFI	0.136617	0.0820975	0.0467239	Lower expr.	0
SARC	PEBP1	OS	0.895234	0.584403	0.58472	Lower expr.	0
SARC	PEBP1	PFS	0.889891	0.470442	0.469906	Lower expr.	0
SARC	PEBP1	DSS	0.926114	0.729809	0.730428	Lower expr.	0
SARC	PEBP1	DFI	1.02404	0.922792	0.920926	Higher expr.	0
SARC	YY1	OS	1.24876	0.272408	0.271421	Higher expr.	0
SARC	YY1	PFS	1.20579	0.242639	0.244159	Higher expr.	0
SARC	YY1	DSS	1.35654	0.17399	0.172263	Higher expr.	0
SARC	YY1	DFI	1.74133	0.0263192	0.0249851	Higher expr.	0
SKCM	PEBP1	OS	1.27926	0.0671222	0.0664558	Higher expr.	0
SKCM	PEBP1	PFS	1.11163	0.34388	0.3444	Higher expr.	0
SKCM	PEBP1	DSS	1.19472	0.222457	0.221947	Higher expr.	0
SKCM	YY1	OS	0.931042	0.59847	0.59824	Lower expr.	0
SKCM	YY1	PFS	0.900065	0.347611	0.34719	Lower expr.	0
SKCM	YY1	DSS	0.951744	0.736439	0.736042	Lower expr.	0
STAD	PEBP1	OS	1.13736	0.420029	0.419184	Higher expr.	0
STAD	PEBP1	PFS	1.13034	0.392052	0.391771	Higher expr.	0
STAD	PEBP1	DSS	0.936147	0.749626	0.750393	Lower expr.	0
STAD	PEBP1	DFI	1.1953	0.558104	0.556909	Higher expr.	0
STAD	YY1	OS	1.06023	0.713855	0.713789	Higher expr.	0
STAD	YY1	PFS	1.03831	0.792834	0.791803	Higher expr.	0
STAD	YY1	DSS	1.52097	0.0469629	0.0454492	Higher expr.	0
STAD	YY1	DFI	1.70971	0.0812651	0.0777981	Higher expr.	0
TGCT	PEBP1	OS	1.91839	0.59483	0.588303	Higher expr.	0
TGCT	PEBP1	PFS	1.23571	0.506675	0.495383	Higher expr.	0
TGCT	PEBP1	DSS	1.95016	0.585571	0.578588	Higher expr.	0
TGCT	PEBP1	DFI	1.77165	0.109384	0.0985411	Higher expr.	0
TGCT	YY1	OS	1.38016	0.752958	0.752044	Higher expr.	0
TGCT	YY1	PFS	1.48834	0.21346	0.214267	Higher expr.	0
TGCT	YY1	DSS	2.12009	0.539548	0.529988	Higher expr.	0
TGCT	YY1	DFI	1.76189	0.125976	0.127952	Higher expr.	0
THCA	PEBP1	OS	0.55369	0.274226	0.267368	Lower expr.	0
THCA	PEBP1	PFS	0.64257	0.0885196	0.0859096	Lower expr.	0
THCA	PEBP1	DSS	0.842582	0.822812	0.822601	Lower expr.	0
THCA	PEBP1	DFI	0.469163	0.0638052	0.057745	Lower expr.	0
THCA	YY1	OS	1.19051	0.729715	0.729388	Higher expr.	0
THCA	YY1	PFS	1.7829	0.0271769	0.0251513	Higher expr.	0
THCA	YY1	DSS	0.71514	0.660811	0.659324	Lower expr.	0
THCA	YY1	DFI	2.89597	0.01551	0.0112366	Higher expr.	0
THYM	PEBP1	OS	1.87339	0.376662	0.369032	Higher expr.	0
THYM	PEBP1	PFS	0.931578	0.862445	0.862417	Lower expr.	0
THYM	PEBP1	DSS	3.12568	0.325051	0.299644	Higher expr.	0
THYM	YY1	OS	0.352405	0.153579	0.138704	Lower expr.	0
THYM	YY1	PFS	0.499149	0.110542	0.104192	Lower expr.	0
THYM	YY1	DSS	3.52433e-10	0.999169	0.0153605	Lower expr.	0
UCEC	PEBP1	OS	0.849955	0.64964	0.649312	Lower expr.	0
UCEC	PEBP1	PFS	0.897546	0.709315	0.710368	Lower expr.	0
UCEC	PEBP1	DSS	0.689888	0.391696	0.389221	Lower expr.	0
UCEC	PEBP1	DFI	1.0563	0.913094	0.913083	Higher expr.	0
UCEC	YY1	OS	1.08052	0.830556	0.830515	Higher expr.	0
UCEC	YY1	PFS	1.24352	0.451145	0.450124	Higher expr.	0
UCEC	YY1	DSS	1.39529	0.443145	0.441058	Higher expr.	0
UCEC	YY1	DFI	0.95169	0.921762	0.921754	Lower expr.	0
UCS	PEBP1	OS	1.05292	0.879122	0.879039	Higher expr.	0
UCS	PEBP1	PFS	1.05711	0.859672	0.859451	Higher expr.	0
UCS	PEBP1	DSS	1.05076	0.89103	0.891219	Higher expr.	0
UCS	PEBP1	DFI	2.55087	0.175151	0.159833	Higher expr.	0
UCS	YY1	OS	0.933954	0.840769	0.840539	Lower expr.	0
UCS	YY1	PFS	1.08277	0.800174	0.800709	Higher expr.	0
UCS	YY1	DSS	0.954193	0.896391	0.896307	Lower expr.	0
UCS	YY1	DFI	0.836719	0.783365	0.783092	Lower expr.	0
UVM	PEBP1	OS	0.328658	0.0210123	0.0155497	Lower expr.	0
UVM	PEBP1	PFS	0.452911	0.0413248	0.0364186	Lower expr.	0
UVM	PEBP1	DSS	0.329299	0.0306061	0.023025	Lower expr.	0
UVM	YY1	OS	0.874275	0.753516	0.75335	Lower expr.	0
UVM	YY1	PFS	1.30842	0.464079	0.462157	Higher expr.	0
UVM	YY1	DSS	0.95844	0.924106	0.924101	Lower expr.	0
