# Supplementary material for: Cross-Talks between RKIP and YY1 through a Multilevel Bioinformatics Pan-Cancer Analysis
Source: Preprints.org preprint supplement (doi:10.20944/preprints202309.0467.v1), 2023-09-07
Supplement: Supplementary file 11 [file Table S5.xlsx]

## Sheet: PEBP1
DATASET	CANCER TYPE	SUBTYPE	ENDPOINT	COHORT	CONTRIBUTOR	ARRAY TYPE	PROBE ID	N	CUTPOINT	MINIMUM P-VALUE	CORRECTED P-VALUE	ln(HRhigh / HRlow)	COX P-VALUE	ln(HR)	HR [95% CIlow - CIupp]
GSE5287	Bladder cancer		Overall Survival	Aarhus (1995-2004)	Als	HG-U133A	205353_s_at	30	0.43	0.002144	0.047942	-1.29	0.234037	-0.4	0.67 [0.35 - 1.30]
GSE5287	Bladder cancer		Overall Survival	Aarhus (1995-2004)	Als	HG-U133A	211941_s_at	30	0.27	0.071135	-	-0.78	0.964243	-0.02	0.98 [0.48 - 2.00]
GSE13507	Bladder cancer		Overall Survival	CNUH	Kim	Human-6 v2	ILMN_1688089	165	0.21	0.046016	0.467134	-0.54	0.763462	-0.07	0.93 [0.60 - 1.45]
GSE13507	Bladder cancer	Transitional cell carcinoma	Disease Specific Survival	CNUH	Kim	Human-6 v2	ILMN_1688089	165	0.25	0.133283	-	-0.55	0.341313	-0.32	0.73 [0.38 - 1.40]
GSE12417-GPL96	Blood cancer	AML	Overall Survival	AMLCG (1999-2003)	Metzeler	HG-U133A	205353_s_at	163	0.74	0.00031	0.009405	0.74	0.017165	0.36	1.43 [1.07 - 1.91]
GSE12417-GPL96	Blood cancer	AML	Overall Survival	AMLCG (1999-2003)	Metzeler	HG-U133A	211941_s_at	163	0.46	0.028204	0.339846	0.44	0.19012	0.19	1.21 [0.91 - 1.62]
GSE12417-GPL570	Blood cancer	AML	Overall Survival	AMLCG (2004)	Metzeler	HG-U133_Plus_2	205353_s_at	79	0.22	0.139933	-	0.57	0.367037	0.2	1.23 [0.79 - 1.92]
GSE12417-GPL570	Blood cancer	AML	Overall Survival	AMLCG (2004)	Metzeler	HG-U133_Plus_2	211941_s_at	79	0.67	0.11815	-	0.46	0.72492	0.07	1.08 [0.72 - 1.62]
GSE5122	Blood cancer	AML	Overall Survival	San Diego	Raponi	HG-U133A	205353_s_at	58	0.17	0.0018	0.041545	-1.14	0.11635	-0.61	0.54 [0.26 - 1.16]
GSE5122	Blood cancer	AML	Overall Survival	San Diego	Raponi	HG-U133A	211941_s_at	58	0.81	0.022297	0.289183	0.77	0.714003	0.11	1.12 [0.61 - 2.04]
GSE8970	Blood cancer	AML	Overall Survival	San Diego	Raponi	HG-U133A	205353_s_at	34	0.44	0.054727	-	0.79	0.660249	0.19	1.20 [0.53 - 2.75]
GSE8970	Blood cancer	AML	Overall Survival	San Diego	Raponi	HG-U133A	211941_s_at	34	0.85	0.074898	-	0.87	0.96074	-0.02	0.98 [0.41 - 2.33]
GSE4475	Blood cancer	B-cell lymphoma	Overall Survival	Berlin (2003-2005)	Hummel	HG-U133A	205353_s_at	158	0.28	0.017207	0.240731	0.68	0.188834	0.29	1.34 [0.87 - 2.08]
GSE4475	Blood cancer	B-cell lymphoma	Overall Survival	Berlin (2003-2005)	Hummel	HG-U133A	211941_s_at	158	0.85	0.13582	-	0.47	0.186964	0.32	1.37 [0.86 - 2.19]
E-TABM-346	Blood cancer	DLBCL	Event Free Survival	GELA (1998-2000)	Jais	HG-U133A	205353_s_at	53	0.62	0.107328	-	0.55	0.536761	0.28	1.32 [0.54 - 3.23]
E-TABM-346	Blood cancer	DLBCL	Overall Survival	GELA (1998-2000)	Jais	HG-U133A	205353_s_at	53	0.13	0.183593	-	0.94	0.545736	0.3	1.35 [0.51 - 3.57]
E-TABM-346	Blood cancer	DLBCL	Event Free Survival	GELA (1998-2000)	Jais	HG-U133A	211941_s_at	53	0.15	0.313607	-	0.53	0.666477	0.23	1.26 [0.44 - 3.65]
E-TABM-346	Blood cancer	DLBCL	Overall Survival	GELA (1998-2000)	Jais	HG-U133A	211941_s_at	53	0.11	0.274243	-	0.78	0.633202	0.28	1.33 [0.41 - 4.28]
GSE16131-GPL96	Blood cancer	Follicular lymphoma	Overall Survival	NCI (1974-2001)	Dave	HG-U133A	205353_s_at	180	0.88	0.217312	-	0.37	0.567652	0.18	1.20 [0.64 - 2.26]
GSE16131-GPL96	Blood cancer	Follicular lymphoma	Overall Survival	NCI (1974-2001)	Dave	HG-U133A	211941_s_at	180	0.15	0.345784	-	0.33	0.841663	0.08	1.09 [0.49 - 2.43]
GSE2658	Blood cancer	Multiple myeloma	Disease Specific Survival	Arkansas	Zhan	HG-U133_Plus_2	205353_s_at	559	0.1	0.239345	-	-0.33	0.757516	-0.07	0.94 [0.61 - 1.43]
GSE2658	Blood cancer	Multiple myeloma	Disease Specific Survival	Arkansas	Zhan	HG-U133_Plus_2	211941_s_at	559	0.73	0.130367	-	0.32	0.873425	0.04	1.04 [0.61 - 1.79]
GSE4271-GPL96	Brain cancer	Astrocytoma	Overall Survival	MDA	Phillips	HG-U133A	205353_s_at	77	0.26	0.012143	0.18667	-0.7	0.340203	-0.38	0.69 [0.32 - 1.49]
GSE4271-GPL96	Brain cancer	Astrocytoma	Overall Survival	MDA	Phillips	HG-U133A	211941_s_at	77	0.6	0.004344	0.084698	-0.78	0.003003	-1	0.37 [0.19 - 0.71]
GSE7696	Brain cancer	Glioblastoma	Overall Survival	Lausanne	Murat	HG-U133_Plus_2	205353_s_at	70	0.89	0.288049	-	0.44	0.821709	0.06	1.06 [0.62 - 1.83]
GSE7696	Brain cancer	Glioblastoma	Overall Survival	Lausanne	Murat	HG-U133_Plus_2	211941_s_at	70	0.76	0.056097	-	0.58	0.659103	0.12	1.13 [0.66 - 1.95]
MGH-glioma	Brain cancer	Glioma	Overall Survival	CBTTB, MGH, BWH, CH	Nutt	HG-U95A	32611_at	50	0.18	0.013205	0.198592	-0.99	0.638974	-0.17	0.84 [0.41 - 1.72]
GSE4412-GPL96	Brain cancer	Glioma	Overall Survival	UCLA (1996-2003)	Freije	HG-U133A	205353_s_at	74	0.36	0.119059	-	-0.46	0.834155	0.09	1.09 [0.49 - 2.45]
GSE4412-GPL96	Brain cancer	Glioma	Overall Survival	UCLA (1996-2003)	Freije	HG-U133A	211941_s_at	74	0.85	0.033034	0.377702	0.72	0.736638	0.15	1.17 [0.48 - 2.84]
GSE16581	Brain cancer	Meningioma	Overall Survival	UCLA	Lee	HG-U133_Plus_2	205353_s_at	67	0.79	0.000925	0.023876	1.93	0.071207	2.39	10.92 [0.81 - 146.47]
GSE16581	Brain cancer	Meningioma	Overall Survival	UCLA	Lee	HG-U133_Plus_2	211941_s_at	67	0.61	0.116742	-	1.05	0.864452	0.37	1.45 [0.02 - 106.14]
GSE19615	Breast cancer		Distant Metastasis Free Survival	DF/HCC	Li	HG-U133_Plus_2	205353_s_at	115	0.14	0.000515	0.014535	-1.68	0.152359	-1.19	0.30 [0.06 - 1.55]
GSE19615	Breast cancer		Distant Metastasis Free Survival	DF/HCC	Li	HG-U133_Plus_2	211941_s_at	115	0.11	0.018886	0.257284	-1.29	0.716782	-0.31	0.74 [0.14 - 3.84]
GSE3143	Breast cancer		Overall Survival	Duke	Bild	HG-U95A	32611_at	158	0.65	0.022624	0.292132	-0.77	0.066589	-0.9	0.40 [0.15 - 1.06]
GSE7849	Breast cancer		Disease Free Survival	Duke (1990-2001)	Anders	HG-U95A	32611_at	76	0.29	0.178187	-	0.98	0.544515	0.5	1.65 [0.33 - 8.41]
GSE12276	Breast cancer		Relapse Free Survival	EMC	Bos	HG-U133_Plus_2	205353_s_at	204	0.74	0.064889	-	-0.29	0.308651	-0.19	0.83 [0.58 - 1.19]
GSE12276	Breast cancer		Relapse Free Survival	EMC	Bos	HG-U133_Plus_2	211941_s_at	204	0.76	0.084562	-	0.29	0.989969	0	1.00 [0.62 - 1.61]
GSE6532-GPL570	Breast cancer		Relapse Free Survival	GUYT	Loi	HG-U133_Plus_2	205353_s_at	87	0.82	0.031435	0.365483	-1.9	0.789342	-0.13	0.88 [0.34 - 2.25]
GSE6532-GPL570	Breast cancer		Distant Metastasis Free Survival	GUYT	Loi	HG-U133_Plus_2	205353_s_at	87	0.82	0.031435	0.365483	-1.9	0.789342	-0.13	0.88 [0.34 - 2.25]
GSE6532-GPL570	Breast cancer		Relapse Free Survival	GUYT	Loi	HG-U133_Plus_2	211941_s_at	87	0.89	0.130351	-	-1.42	0.522876	-0.3	0.74 [0.29 - 1.86]
GSE6532-GPL570	Breast cancer		Distant Metastasis Free Survival	GUYT	Loi	HG-U133_Plus_2	211941_s_at	87	0.89	0.130351	-	-1.42	0.522876	-0.3	0.74 [0.29 - 1.86]
GSE9195	Breast cancer		Relapse Free Survival	GUYT2	Loi	HG-U133_Plus_2	205353_s_at	77	0.55	0.058002	-	-1.18	0.8474	-0.13	0.88 [0.23 - 3.31]
GSE9195	Breast cancer		Distant Metastasis Free Survival	GUYT2	Loi	HG-U133_Plus_2	205353_s_at	77	0.19	0.119535	-	15.35	0.888981	0.11	1.11 [0.25 - 4.96]
GSE9195	Breast cancer		Relapse Free Survival	GUYT2	Loi	HG-U133_Plus_2	211941_s_at	77	0.49	0.020043	0.268352	-1.41	0.784701	-0.19	0.83 [0.21 - 3.28]
GSE9195	Breast cancer		Distant Metastasis Free Survival	GUYT2	Loi	HG-U133_Plus_2	211941_s_at	77	0.49	0.026262	0.323765	-1.59	0.847564	-0.15	0.86 [0.18 - 4.09]
GSE12093	Breast cancer		Distant Metastasis Free Survival	IO, NCI, TUM, CCF (1992-2000)	Zhang	HG-U133A	205353_s_at	136	0.85	0.086866	-	0.87	0.757601	0.18	1.19 [0.39 - 3.67]
GSE12093	Breast cancer		Distant Metastasis Free Survival	IO, NCI, TUM, CCF (1992-2000)	Zhang	HG-U133A	211941_s_at	136	0.46	0.129634	-	-0.7	0.129349	-0.58	0.56 [0.27 - 1.18]
GSE11121	Breast cancer		Distant Metastasis Free Survival	Mainz (1988-1998)	Schmidt	HG-U133A	205353_s_at	200	0.23	0.016591	0.234511	-0.73	0.22417	-0.59	0.55 [0.21 - 1.43]
GSE11121	Breast cancer		Distant Metastasis Free Survival	Mainz (1988-1998)	Schmidt	HG-U133A	211941_s_at	200	0.73	0.202683	-	0.4	0.94953	0.03	1.04 [0.35 - 3.04]
GSE1378	Breast cancer		Relapse Free Survival	MGH (1987-2000)	Ma	Arcturus 22k	18279	60	0.73	0.254919	-	-0.52	0.868922	-0.05	0.95 [0.52 - 1.73]
GSE1379	Breast cancer		Relapse Free Survival	MGH (1987-2000)	Ma	Arcturus 22k	18279	60	0.47	3.8e-05	0.001494	-1.63	0.012497	-2.36	0.09 [0.01 - 0.60]
GSE2034	Breast cancer		Distant Metastasis Free Survival	Rotterdam (1980-1995)	Wang	HG-U133A	205353_s_at	286	0.3	0.001181	0.029295	-0.63	0.057442	-0.53	0.59 [0.34 - 1.02]
GSE2034	Breast cancer		Distant Metastasis Free Survival	Rotterdam (1980-1995)	Wang	HG-U133A	211941_s_at	286	0.63	1.7e-05	0.000708	-0.99	0.00179	-0.76	0.47 [0.29 - 0.75]
GSE1456-GPL96	Breast cancer		Overall Survival	Stockholm (1994-1996)	Pawitan	HG-U133A	205353_s_at	159	0.11	0.027839	0.336862	-0.84	0.188112	-0.51	0.60 [0.28 - 1.29]
GSE1456-GPL96	Breast cancer		Relapse Free Survival	Stockholm (1994-1996)	Pawitan	HG-U133A	205353_s_at	159	0.41	0.095862	-	0.57	0.81996	0.09	1.09 [0.51 - 2.33]
GSE1456-GPL96	Breast cancer		Disease Specific Survival	Stockholm (1994-1996)	Pawitan	HG-U133A	205353_s_at	159	0.1	0.039944	0.427294	-0.91	0.422524	-0.37	0.69 [0.28 - 1.70]
GSE1456-GPL96	Breast cancer		Overall Survival	Stockholm (1994-1996)	Pawitan	HG-U133A	211941_s_at	159	0.45	0.074642	-	0.59	0.763454	0.13	1.14 [0.50 - 2.60]
GSE1456-GPL96	Breast cancer		Relapse Free Survival	Stockholm (1994-1996)	Pawitan	HG-U133A	211941_s_at	159	0.81	0.008368	0.141067	0.86	0.250035	0.47	1.60 [0.72 - 3.59]
GSE1456-GPL96	Breast cancer		Disease Specific Survival	Stockholm (1994-1996)	Pawitan	HG-U133A	211941_s_at	159	0.48	0.048626	0.483318	0.77	0.643768	0.23	1.26 [0.48 - 3.29]
GSE7378	Breast cancer		Disease Free Survival	UCSF	Zhou	U133AAofAv2	205353_s_at	54	0.48	0.113291	-	1.2	0.532257	0.5	1.65 [0.34 - 7.90]
GSE7378	Breast cancer		Disease Free Survival	UCSF	Zhou	U133AAofAv2	211941_s_at	54	0.15	0.171438	-	15.35	0.590295	0.3	1.35 [0.45 - 4.04]
E-TABM-158	Breast cancer		Distant Metastasis Free Survival	UCSF, CPMC (1989-1997)	Chin	HG-U133A	205353_s_at	117	0.53	0.179233	-	-0.55	0.718127	-0.17	0.84 [0.33 - 2.13]
E-TABM-158	Breast cancer		Relapse Free Survival	UCSF, CPMC (1989-1997)	Chin	HG-U133A	205353_s_at	117	0.44	0.083462	-	-0.55	0.685864	-0.15	0.86 [0.41 - 1.81]
E-TABM-158	Breast cancer		Overall Survival	UCSF, CPMC (1989-1997)	Chin	HG-U133A	205353_s_at	117	0.44	0.083462	-	-0.55	0.685864	-0.15	0.86 [0.41 - 1.81]
E-TABM-158	Breast cancer		Disease Specific Survival	UCSF, CPMC (1989-1997)	Chin	HG-U133A	205353_s_at	117	0.44	0.326955	-	-0.37	0.897265	-0.06	0.94 [0.38 - 2.32]
E-TABM-158	Breast cancer		Distant Metastasis Free Survival	UCSF, CPMC (1989-1997)	Chin	HG-U133A	211941_s_at	117	0.46	0.233467	-	-0.47	0.931235	-0.04	0.96 [0.42 - 2.23]
E-TABM-158	Breast cancer		Relapse Free Survival	UCSF, CPMC (1989-1997)	Chin	HG-U133A	211941_s_at	117	0.75	0.294216	-	0.36	0.409445	0.29	1.33 [0.67 - 2.65]
E-TABM-158	Breast cancer		Overall Survival	UCSF, CPMC (1989-1997)	Chin	HG-U133A	211941_s_at	117	0.75	0.294216	-	0.36	0.409445	0.29	1.33 [0.67 - 2.65]
E-TABM-158	Breast cancer		Disease Specific Survival	UCSF, CPMC (1989-1997)	Chin	HG-U133A	211941_s_at	117	0.75	0.259021	-	0.45	0.465995	0.3	1.36 [0.60 - 3.07]
GSE3494-GPL96	Breast cancer		Disease Specific Survival	Uppsala (1987-1989)	Miller	HG-U133A	205353_s_at	236	0.86	9.5e-05	0.003355	1.1	0.177284	0.53	1.71 [0.79 - 3.71]
GSE3494-GPL96	Breast cancer		Disease Specific Survival	Uppsala (1987-1989)	Miller	HG-U133A	211941_s_at	236	0.74	0.022827	0.293953	0.62	0.470816	0.34	1.41 [0.56 - 3.56]
GSE4922-GPL96	Breast cancer		Disease Free Survival	Uppsala (1987-1989)	Ivshina	HG-U133A	205353_s_at	249	0.79	0.001581	0.03733	0.72	0.221189	0.38	1.47 [0.79 - 2.70]
GSE4922-GPL96	Breast cancer		Disease Free Survival	Uppsala (1987-1989)	Ivshina	HG-U133A	211941_s_at	249	0.75	0.004437	0.08613	0.62	0.070922	0.67	1.96 [0.94 - 4.07]
GSE2990	Breast cancer		Distant Metastasis Free Survival	Uppsala, Oxford	Sotiriou	HG-U133A	205353_s_at	125	0.62	0.003551	0.07213	1.09	0.143009	0.7	2.02 [0.79 - 5.15]
GSE2990	Breast cancer		Distant Metastasis Free Survival	Uppsala, Oxford	Sotiriou	HG-U133A	205353_s_at	54	0.89	0.137368	-	0.97	0.897108	0.05	1.05 [0.52 - 2.09]
GSE2990	Breast cancer		Relapse Free Survival	Uppsala, Oxford	Sotiriou	HG-U133A	205353_s_at	125	0.62	0.017097	0.239629	0.68	0.614101	0.19	1.21 [0.58 - 2.50]
GSE2990	Breast cancer		Relapse Free Survival	Uppsala, Oxford	Sotiriou	HG-U133A	205353_s_at	62	0.89	0.022506	0.291072	1.16	0.972028	0.01	1.01 [0.58 - 1.77]
GSE2990	Breast cancer		Distant Metastasis Free Survival	Uppsala, Oxford	Sotiriou	HG-U133A	211941_s_at	125	0.1	0.088185	-	15.17	0.676257	0.16	1.18 [0.54 - 2.56]
GSE2990	Breast cancer		Distant Metastasis Free Survival	Uppsala, Oxford	Sotiriou	HG-U133A	211941_s_at	54	0.11	0.008647	0.144633	-1.65	0.915786	0.06	1.06 [0.34 - 3.30]
GSE2990	Breast cancer		Relapse Free Survival	Uppsala, Oxford	Sotiriou	HG-U133A	211941_s_at	125	0.82	0.245907	-	-0.45	0.738131	-0.1	0.90 [0.49 - 1.65]
GSE2990	Breast cancer		Relapse Free Survival	Uppsala, Oxford	Sotiriou	HG-U133A	211941_s_at	62	0.11	0.000689	0.018605	-1.68	0.855645	0.08	1.09 [0.44 - 2.68]
GSE7390	Breast cancer		Relapse Free Survival	Uppsala, Oxford, Stockholm, IGR, GUYT, CRH (1980-1998)	Desmedt	HG-U133A	205353_s_at	198	0.21	0.001859	0.042649	-0.72	0.005239	-0.58	0.56 [0.37 - 0.84]
GSE7390	Breast cancer		Distant Metastasis Free Survival	Uppsala, Oxford, Stockholm, IGR, GUYT, CRH (1980-1998)	Desmedt	HG-U133A	205353_s_at	198	0.68	0.004855	0.092474	-0.91	0.052258	-0.49	0.61 [0.38 - 1.00]
GSE7390	Breast cancer		Overall Survival	Uppsala, Oxford, Stockholm, IGR, GUYT, CRH (1980-1998)	Desmedt	HG-U133A	205353_s_at	198	0.19	0.004659	0.08952	-0.82	0.042071	-0.53	0.59 [0.35 - 0.98]
GSE7390	Breast cancer		Relapse Free Survival	Uppsala, Oxford, Stockholm, IGR, GUYT, CRH (1980-1998)	Desmedt	HG-U133A	211941_s_at	198	0.1	0.155227	-	-0.45	0.482131	-0.17	0.84 [0.52 - 1.36]
GSE7390	Breast cancer		Distant Metastasis Free Survival	Uppsala, Oxford, Stockholm, IGR, GUYT, CRH (1980-1998)	Desmedt	HG-U133A	211941_s_at	198	0.12	0.04131	0.43654	-0.67	0.474345	-0.21	0.81 [0.46 - 1.44]
GSE7390	Breast cancer		Overall Survival	Uppsala, Oxford, Stockholm, IGR, GUYT, CRH (1980-1998)	Desmedt	HG-U133A	211941_s_at	198	0.1	0.022383	0.289968	-0.81	0.270806	-0.33	0.72 [0.40 - 1.30]
GSE12945	Colorectal cancer		Disease Free Survival	Berlin	Staub	HG-U133A	205353_s_at	51	0.51	0.189546	-	-1.36	0.813593	-0.23	0.80 [0.12 - 5.30]
GSE12945	Colorectal cancer		Overall Survival	Berlin	Staub	HG-U133A	205353_s_at	62	0.81	0.183293	-	0.79	0.740326	0.21	1.23 [0.36 - 4.14]
GSE12945	Colorectal cancer		Disease Free Survival	Berlin	Staub	HG-U133A	211941_s_at	51	0.39	0.059098	-	-1.84	0.379975	-0.97	0.38 [0.04 - 3.30]
GSE12945	Colorectal cancer		Overall Survival	Berlin	Staub	HG-U133A	211941_s_at	62	0.85	0.004931	0.093608	1.51	0.675064	0.26	1.30 [0.38 - 4.46]
GSE17536	Colorectal cancer		Disease Free Survival	MCC	Smith	HG-U133_Plus_2	205353_s_at	145	0.56	0.063758	-	-0.64	0.878182	0.06	1.07 [0.47 - 2.42]
GSE17536	Colorectal cancer		Overall Survival	MCC	Smith	HG-U133_Plus_2	205353_s_at	177	0.87	0.152866	-	0.43	0.298623	0.31	1.36 [0.76 - 2.44]
GSE17536	Colorectal cancer		Disease Specific Survival	MCC	Smith	HG-U133_Plus_2	205353_s_at	177	0.87	0.190804	-	0.45	0.536058	0.21	1.24 [0.63 - 2.42]
GSE17536	Colorectal cancer		Disease Free Survival	MCC	Smith	HG-U133_Plus_2	211941_s_at	145	0.69	0.029432	0.349745	-0.94	0.31251	-0.44	0.64 [0.28 - 1.51]
GSE17536	Colorectal cancer		Overall Survival	MCC	Smith	HG-U133_Plus_2	211941_s_at	177	0.66	0.118234	-	-0.4	0.55315	0.2	1.23 [0.63 - 2.40]
GSE17536	Colorectal cancer		Disease Specific Survival	MCC	Smith	HG-U133_Plus_2	211941_s_at	177	0.66	0.075742	-	-0.55	0.789409	0.1	1.11 [0.51 - 2.40]
GSE14333	Colorectal cancer		Disease Free Survival	Melbourne	Jorissen	HG-U133_Plus_2	205353_s_at	226	0.84	0.196732	-	0.44	0.964061	-0.01	0.99 [0.52 - 1.87]
GSE14333	Colorectal cancer		Disease Free Survival	Melbourne	Jorissen	HG-U133_Plus_2	211941_s_at	226	0.43	0.131754	-	-0.42	0.338182	-0.38	0.68 [0.31 - 1.49]
GSE17537	Colorectal cancer		Overall Survival	VMC	Smith	HG-U133_Plus_2	205353_s_at	55	0.71	0.150344	-	0.65	0.573402	0.27	1.31 [0.51 - 3.33]
GSE17537	Colorectal cancer		Disease Free Survival	VMC	Smith	HG-U133_Plus_2	205353_s_at	55	0.18	0.014704	0.214864	15.49	0.134078	0.76	2.13 [0.79 - 5.72]
GSE17537	Colorectal cancer		Disease Specific Survival	VMC	Smith	HG-U133_Plus_2	205353_s_at	49	0.18	0.325854	-	0.99	0.837581	0.13	1.14 [0.34 - 3.82]
GSE17537	Colorectal cancer		Overall Survival	VMC	Smith	HG-U133_Plus_2	211941_s_at	55	0.75	0.00247	0.053816	1.29	0.052816	0.86	2.37 [0.99 - 5.69]
GSE17537	Colorectal cancer		Disease Free Survival	VMC	Smith	HG-U133_Plus_2	211941_s_at	55	0.76	0.000666	0.018081	1.57	0.001801	1.63	5.10 [1.83 - 14.21]
GSE17537	Colorectal cancer		Disease Specific Survival	VMC	Smith	HG-U133_Plus_2	211941_s_at	49	0.57	0.040306	0.429764	1.2	0.138263	0.83	2.30 [0.76 - 6.92]
GSE11595	Esophagus cancer	Adenocarcinoma	Overall Survival	Sutton	Giddings	CRUKDMF_22K_v1.0.0	843134	34	0.68	0.025535	0.317609	0.95	0.127394	0.7	2.01 [0.82 - 4.92]
GSE22138	Eye cancer	Uveal melanoma	Distant Metastasis Free Survival	BRCIC	Laurent	HG-U133_Plus_2	205353_s_at	63	0.3	0.203203	-	-0.45	0.87062	0.04	1.04 [0.65 - 1.66]
GSE22138	Eye cancer	Uveal melanoma	Distant Metastasis Free Survival	BRCIC	Laurent	HG-U133_Plus_2	211941_s_at	63	0.35	0.326803	-	-0.34	0.981531	-0.01	0.99 [0.63 - 1.56]
GSE2837	Head and neck cancer	Squamous cell carcinoma	Relapse Free Survival	VUMC, VAMC, UTMDACC (1992-2005)	Chung	U133_X3P	g4505620_3p_a_at	28	0.57	0.063715	-	-1.15	0.522802	-0.4	0.67 [0.20 - 2.28]
GSE2837	Head and neck cancer	Squamous cell carcinoma	Relapse Free Survival	VUMC, VAMC, UTMDACC (1992-2005)	Chung	U133_X3P	Hs.80423.1.S1_3p_a_at	28	0.14	0.262339	-	1.11	0.964408	-0.01	0.99 [0.51 - 1.89]
jacob-00182-CANDF	Lung cancer	Adenocarcinoma	Overall Survival	CAN/DF	Shedden	HG-U133A	205353_s_at	82	0.22	0.266028	-	-0.43	0.546926	-0.25	0.78 [0.34 - 1.76]
jacob-00182-CANDF	Lung cancer	Adenocarcinoma	Overall Survival	CAN/DF	Shedden	HG-U133A	211941_s_at	82	0.82	0.195069	-	0.5	0.936382	-0.03	0.97 [0.43 - 2.19]
HARVARD-LC	Lung cancer	Adenocarcinoma	Overall Survival	Harvard	Beer	HG-U95A	32611_at	84	0.63	0.007337	0.127561	-0.9	0.011061	-1.13	0.32 [0.14 - 0.77]
jacob-00182-HLM	Lung cancer	Adenocarcinoma	Overall Survival	HLM	Shedden	HG-U133A	205353_s_at	79	0.14	7e-05	0.002564	-1.35	0.035309	-0.47	0.63 [0.41 - 0.97]
jacob-00182-HLM	Lung cancer	Adenocarcinoma	Overall Survival	HLM	Shedden	HG-U133A	211941_s_at	79	0.11	0.000165	0.005441	-1.35	0.036383	-0.63	0.53 [0.30 - 0.96]
MICHIGAN-LC	Lung cancer	Adenocarcinoma	Overall Survival	Michigan (1994-2000)	Beer	HuGeneFL	X75252_at	86	0.24	0.024476	0.308498	-0.89	0.365017	-0.54	0.58 [0.18 - 1.88]
jacob-00182-MSK	Lung cancer	Adenocarcinoma	Overall Survival	MSK	Shedden	HG-U133A	205353_s_at	104	0.59	0.025034	0.313315	-0.78	0.127113	-0.69	0.50 [0.21 - 1.22]
jacob-00182-MSK	Lung cancer	Adenocarcinoma	Overall Survival	MSK	Shedden	HG-U133A	211941_s_at	104	0.38	0.035	0.392319	-0.67	0.26964	-0.56	0.57 [0.21 - 1.55]
GSE13213	Lung cancer	Adenocarcinoma	Overall Survival	Nagoya (1995-1999, 2002-2004)	Tomida	G4112F	A_23_P13604	117	0.46	0.002896	0.061226	-0.85	0.048101	-0.46	0.63 [0.40 - 1.00]
GSE31210	Lung cancer	Adenocarcinoma	Overall Survival	NCCRI	Okayama	HG-U133_Plus_2	205353_s_at	204	0.65	0.126009	-	-0.65	0.722533	-0.19	0.82 [0.28 - 2.41]
GSE31210	Lung cancer	Adenocarcinoma	Relapse Free Survival	NCCRI	Okayama	HG-U133_Plus_2	205353_s_at	204	0.39	0.020294	0.270721	-0.62	0.269525	-0.44	0.64 [0.29 - 1.41]
GSE31210	Lung cancer	Adenocarcinoma	Overall Survival	NCCRI	Okayama	HG-U133_Plus_2	211941_s_at	204	0.54	0.16911	-	0.5	0.988045	0.01	1.01 [0.33 - 3.05]
GSE31210	Lung cancer	Adenocarcinoma	Relapse Free Survival	NCCRI	Okayama	HG-U133_Plus_2	211941_s_at	204	0.45	0.045827	0.46594	0.57	0.499342	0.29	1.33 [0.58 - 3.07]
jacob-00182-UM	Lung cancer	Adenocarcinoma	Overall Survival	UM	Shedden	HG-U133A	205353_s_at	178	0.78	0.019475	0.262953	-0.63	0.124156	-0.45	0.64 [0.36 - 1.13]
jacob-00182-UM	Lung cancer	Adenocarcinoma	Overall Survival	UM	Shedden	HG-U133A	211941_s_at	178	0.17	0.005468	0.101531	-0.64	0.094326	-0.52	0.60 [0.33 - 1.09]
GSE11117	Lung cancer	NSCLC	Overall Survival	Basel (2002-2005)	Baty	Novachip human 34.5k	H300001058	41	0.15	0.038885	0.420009	-1.02	0.38602	-0.37	0.69 [0.30 - 1.60]
GSE3141	Lung cancer	NSCLC	Overall Survival	Duke	Bild	HG-U133_Plus_2	205353_s_at	111	0.13	0.008698	0.145293	-0.89	0.067636	-0.42	0.65 [0.42 - 1.03]
GSE3141	Lung cancer	NSCLC	Overall Survival	Duke	Bild	HG-U133_Plus_2	211941_s_at	111	0.11	0.038093	0.414487	-0.78	0.107202	-0.48	0.62 [0.34 - 1.11]
GSE14814	Lung cancer	NSCLC	Overall Survival	JRB.10	Zhu	HG-U133A	205353_s_at	90	0.7	0.077065	-	0.58	0.606118	-0.17	0.84 [0.44 - 1.62]
GSE14814	Lung cancer	NSCLC	Disease Specific Survival	JRB.10	Zhu	HG-U133A	205353_s_at	90	0.8	0.012377	0.189328	0.94	0.757478	-0.12	0.89 [0.42 - 1.89]
GSE14814	Lung cancer	NSCLC	Overall Survival	JRB.10	Zhu	HG-U133A	211941_s_at	90	0.17	0.016551	0.234101	-0.86	0.610214	-0.24	0.79 [0.31 - 1.98]
GSE14814	Lung cancer	NSCLC	Disease Specific Survival	JRB.10	Zhu	HG-U133A	211941_s_at	90	0.86	0.025485	0.317182	0.94	0.93035	0.05	1.05 [0.35 - 3.12]
GSE4716-GPL3694	Lung cancer	NSCLC	Overall Survival	Nagoya (1995-1996)	Tomida	GF200	1610	50	0.86	0.009396	0.154041	1.31	0.101947	0.78	2.19 [0.86 - 5.59]
GSE8894	Lung cancer	NSCLC	Relapse Free Survival	Seoul (1995-2005)	Lee	HG-U133_Plus_2	205353_s_at	138	0.46	0.025456	0.316939	-0.54	0.030078	-0.25	0.78 [0.62 - 0.98]
GSE8894	Lung cancer	NSCLC	Relapse Free Survival	Seoul (1995-2005)	Lee	HG-U133_Plus_2	211941_s_at	138	0.1	0.049181	0.486689	-0.66	0.042343	-0.28	0.75 [0.57 - 0.99]
GSE4573	Lung cancer	Squamous cell carcinoma	Overall Survival	Michigan (1991-2002)	Raponi	HG-U133A	205353_s_at	129	0.29	0.214675	-	0.34	0.970566	-0.01	0.99 [0.65 - 1.51]
GSE4573	Lung cancer	Squamous cell carcinoma	Overall Survival	Michigan (1991-2002)	Raponi	HG-U133A	211941_s_at	129	0.62	0.073098	-	0.45	0.587951	0.17	1.18 [0.64 - 2.18]
GSE17710	Lung cancer	Squamous cell carcinoma	Relapse Free Survival	UNC	Wilkerson	Agilent-UNC-custom-4X44K	5346	56	0.86	0.007719	0.132632	1.18	0.594019	0.18	1.20 [0.62 - 2.32]
GSE17710	Lung cancer	Squamous cell carcinoma	Overall Survival	UNC	Wilkerson	Agilent-UNC-custom-4X44K	5346	56	0.84	0.022659	0.292447	0.97	0.463993	0.25	1.28 [0.66 - 2.49]
GSE17710	Lung cancer	Squamous cell carcinoma	Relapse Free Survival	UNC	Wilkerson	Agilent-UNC-custom-4X44K	24640	56	0.5	0.124768	-	0.52	0.624692	0.14	1.15 [0.65 - 2.04]
GSE17710	Lung cancer	Squamous cell carcinoma	Overall Survival	UNC	Wilkerson	Agilent-UNC-custom-4X44K	24640	56	0.61	0.065748	-	0.67	0.473338	0.21	1.23 [0.70 - 2.17]
GSE17710	Lung cancer	Squamous cell carcinoma	Relapse Free Survival	UNC	Wilkerson	Agilent-UNC-custom-4X44K	32229	56	0.89	0.013484	0.201671	1.28	0.890422	0.04	1.04 [0.59 - 1.82]
GSE17710	Lung cancer	Squamous cell carcinoma	Overall Survival	UNC	Wilkerson	Agilent-UNC-custom-4X44K	32229	56	0.89	0.080209	-	0.92	0.72017	0.1	1.10 [0.64 - 1.91]
GSE9891	Ovarian cancer		Overall Survival	AOCS, RBH, WH, NKI-AVL (1992-2006)	Tothill	HG-U133_Plus_2	205353_s_at	278	0.9	0.057922	-	0.53	0.366774	0.18	1.20 [0.81 - 1.79]
GSE9891	Ovarian cancer		Overall Survival	AOCS, RBH, WH, NKI-AVL (1992-2006)	Tothill	HG-U133_Plus_2	211941_s_at	278	0.9	0.108431	-	0.41	0.369134	0.18	1.20 [0.81 - 1.79]
DUKE-OC	Ovarian cancer		Overall Survival	Duke	Bild	HG-U133A	205353_s_at	133	0.23	0.119383	-	0.47	0.544999	0.11	1.11 [0.79 - 1.58]
DUKE-OC	Ovarian cancer		Overall Survival	Duke	Bild	HG-U133A	211941_s_at	133	0.61	0.036582	0.403781	0.49	0.761064	0.06	1.06 [0.73 - 1.54]
GSE8841	Ovarian cancer		Overall Survival	Milan (1992-2003)	Marchini	G4100A	2044	81	0.77	0.022547	0.291445	1.22	0.824665	0.1	1.10 [0.47 - 2.59]
GSE8841	Ovarian cancer		Overall Survival	Milan (1992-2003)	Marchini	G4100A	9072	81	0.88	0.000502	0.014218	1.9	0.328206	0.47	1.61 [0.62 - 4.16]
GSE26712	Ovarian cancer		Overall Survival	MSKCC (1990-2003)	Bonome	HG-U133_Plus_2	205353_s_at	185	0.79	0.126114	-	-0.33	0.424317	-0.09	0.92 [0.74 - 1.13]
GSE26712	Ovarian cancer		Disease Free Survival	MSKCC (1990-2003)	Bonome	HG-U133_Plus_2	205353_s_at	185	0.79	0.066098	-	-0.36	0.465216	-0.07	0.93 [0.77 - 1.13]
GSE26712	Ovarian cancer		Overall Survival	MSKCC (1990-2003)	Bonome	HG-U133_Plus_2	211941_s_at	185	0.51	0.059083	-	-0.34	0.392526	-0.1	0.91 [0.73 - 1.13]
GSE26712	Ovarian cancer		Disease Free Survival	MSKCC (1990-2003)	Bonome	HG-U133_Plus_2	211941_s_at	185	0.44	0.080685	-	-0.28	0.421947	-0.08	0.92 [0.75 - 1.13]
GSE17260	Ovarian cancer		Progression Free Survival	Niigata (1997-2008)	Yoshihara	G4112A	A_23_P13604	110	0.35	0.142687	-	-0.34	0.74214	-0.07	0.93 [0.62 - 1.41]
GSE17260	Ovarian cancer		Overall Survival	Niigata (1997-2008)	Yoshihara	G4112A	A_23_P13604	110	0.13	0.038176	0.415069	-0.8	0.825049	0.06	1.06 [0.63 - 1.78]
GSE14764	Ovarian cancer		Overall Survival	TOC	Denkert	HG-U133A	205353_s_at	80	0.12	0.018748	0.255949	-1.12	0.06412	-0.89	0.41 [0.16 - 1.05]
GSE14764	Ovarian cancer		Overall Survival	TOC	Denkert	HG-U133A	211941_s_at	80	0.53	0.001189	0.029457	-1.79	0.005518	-1.33	0.26 [0.10 - 0.68]
GSE16560	Prostate cancer		Overall Survival	Sweden (1977-1999)	Sboner	6K DASL	DAP4_1331	281	0.24	0.123589	-	-0.25	0.530998	-0.15	0.86 [0.54 - 1.37]
E-DKFZ-1	Renal cell carcinoma		Overall Survival	RZPD	Sueltmann	A-RZPD-20	rzpd.de:huber1:Reporter:IMAGE:307582	59	0.1	0.006525	0.116513	-1.46	0.028733	-1.04	0.35 [0.14 - 0.90]
GSE19234	Skin cancer	Melanoma	Overall Survival	NYU	Bogunovic	HG-U133_Plus_2	205353_s_at	38	0.53	0.034244	0.386747	1	0.118222	1.07	2.90 [0.76 - 11.06]
GSE19234	Skin cancer	Melanoma	Overall Survival	NYU	Bogunovic	HG-U133_Plus_2	211941_s_at	38	0.21	0.013752	0.204601	2.13	0.026811	1.43	4.18 [1.18 - 14.81]
GSE30929	Soft tissue cancer	Liposarcoma	Distant Recurrence Free Survival	MSKCC (1993-2008)	Gobble	HG-U133A	205353_s_at	140	0.21	0.0047	0.090133	-0.83	0.229704	-0.27	0.76 [0.49 - 1.19]
GSE30929	Soft tissue cancer	Liposarcoma	Distant Recurrence Free Survival	MSKCC (1993-2008)	Gobble	HG-U133A	211941_s_at	140	0.34	0.000523	0.014722	-0.97	0.038235	-0.63	0.53 [0.29 - 0.97]

## Sheet: YY1
DATASET	CANCER TYPE	SUBTYPE	ENDPOINT	COHORT	CONTRIBUTOR	ARRAY TYPE	PROBE ID	N	CUTPOINT	MINIMUM P-VALUE	CORRECTED P-VALUE	ln(HRhigh / HRlow)	COX P-VALUE	ln(HR)	HR [95% CIlow - CIupp]
GSE5287	Bladder cancer		Overall Survival	Aarhus (1995-2004)	Als	HG-U133A	200047_s_at	30	0.67	0.013312	0.199779	1.04	0.467575	0.4	1.49 [0.51 - 4.38]
GSE5287	Bladder cancer		Overall Survival	Aarhus (1995-2004)	Als	HG-U133A	201901_s_at	30	0.43	0.215615	-	0.51	0.499425	0.22	1.25 [0.66 - 2.36]
GSE5287	Bladder cancer		Overall Survival	Aarhus (1995-2004)	Als	HG-U133A	201902_s_at	30	0.63	0.059772	-	0.78	0.820097	0.22	1.25 [0.18 - 8.67]
GSE5287	Bladder cancer		Overall Survival	Aarhus (1995-2004)	Als	HG-U133A	213494_s_at	30	0.8	0.010701	0.169881	1.17	0.2229	0.65	1.92 [0.67 - 5.45]
GSE13507	Bladder cancer		Overall Survival	CNUH	Kim	Human-6 v2	ILMN_1770892	165	0.28	0.184218	-	-0.35	0.845933	-0.05	0.95 [0.60 - 1.53]
GSE13507	Bladder cancer	Transitional cell carcinoma	Disease Specific Survival	CNUH	Kim	Human-6 v2	ILMN_1770892	165	0.5	0.208758	-	-0.45	0.899267	-0.04	0.96 [0.48 - 1.90]
GSE12417-GPL96	Blood cancer	AML	Overall Survival	AMLCG (1999-2003)	Metzeler	HG-U133A	200047_s_at	163	0.82	0.299559	-	0.25	0.760052	0.06	1.06 [0.72 - 1.57]
GSE12417-GPL96	Blood cancer	AML	Overall Survival	AMLCG (1999-2003)	Metzeler	HG-U133A	201901_s_at	163	0.12	0.202892	-	0.44	0.774741	0.06	1.06 [0.72 - 1.57]
GSE12417-GPL96	Blood cancer	AML	Overall Survival	AMLCG (1999-2003)	Metzeler	HG-U133A	201902_s_at	163	0.19	0.016355	0.232095	-0.55	0.086809	-0.69	0.50 [0.23 - 1.10]
GSE12417-GPL96	Blood cancer	AML	Overall Survival	AMLCG (1999-2003)	Metzeler	HG-U133A	213494_s_at	163	0.9	0.173206	-	-0.53	0.690842	-0.18	0.83 [0.34 - 2.03]
GSE12417-GPL97	Blood cancer	AML	Overall Survival	AMLCG (1999-2003)	Metzeler	HG-U133B	224711_at	163	0.77	0.007885	0.13481	0.58	0.704944	0.06	1.06 [0.77 - 1.47]
GSE12417-GPL97	Blood cancer	AML	Overall Survival	AMLCG (1999-2003)	Metzeler	HG-U133B	224718_at	163	0.17	0.048942	0.485236	-0.47	0.912135	-0.02	0.98 [0.68 - 1.42]
GSE12417-GPL570	Blood cancer	AML	Overall Survival	AMLCG (2004)	Metzeler	HG-U133_Plus_2	200047_s_at	79	0.65	0.000172	0.005628	1.06	0.060609	1	2.72 [0.96 - 7.74]
GSE12417-GPL570	Blood cancer	AML	Overall Survival	AMLCG (2004)	Metzeler	HG-U133_Plus_2	201901_s_at	79	0.68	0.033942	0.384507	0.63	0.92001	-0.03	0.97 [0.51 - 1.84]
GSE12417-GPL570	Blood cancer	AML	Overall Survival	AMLCG (2004)	Metzeler	HG-U133_Plus_2	201902_s_at	79	0.49	0.050176	-	-0.57	0.349767	-0.41	0.66 [0.28 - 1.58]
GSE12417-GPL570	Blood cancer	AML	Overall Survival	AMLCG (2004)	Metzeler	HG-U133_Plus_2	224711_at	79	0.25	0.004607	0.088728	-0.85	0.086725	-0.63	0.53 [0.26 - 1.09]
GSE12417-GPL570	Blood cancer	AML	Overall Survival	AMLCG (2004)	Metzeler	HG-U133_Plus_2	213494_s_at	79	0.3	0.082152	-	-0.52	0.338245	-0.7	0.49 [0.12 - 2.09]
GSE12417-GPL570	Blood cancer	AML	Overall Survival	AMLCG (2004)	Metzeler	HG-U133_Plus_2	224718_at	79	0.24	0.008555	0.14346	-0.81	0.220849	-0.42	0.66 [0.34 - 1.29]
GSE5122	Blood cancer	AML	Overall Survival	San Diego	Raponi	HG-U133A	200047_s_at	58	0.79	0.104393	-	-0.57	0.875485	-0.04	0.96 [0.57 - 1.61]
GSE5122	Blood cancer	AML	Overall Survival	San Diego	Raponi	HG-U133A	201901_s_at	58	0.57	0.058111	-	-0.54	0.232769	-0.35	0.70 [0.39 - 1.25]
GSE5122	Blood cancer	AML	Overall Survival	San Diego	Raponi	HG-U133A	201902_s_at	58	0.33	0.147581	-	-0.42	0.659823	-0.08	0.93 [0.66 - 1.30]
GSE5122	Blood cancer	AML	Overall Survival	San Diego	Raponi	HG-U133A	213494_s_at	58	0.4	0.273539	-	-0.31	0.850509	-0.05	0.96 [0.59 - 1.54]
GSE8970	Blood cancer	AML	Overall Survival	San Diego	Raponi	HG-U133A	200047_s_at	34	0.15	0.003919	0.078034	2.43	0.013192	1.17	3.24 [1.28 - 8.19]
GSE8970	Blood cancer	AML	Overall Survival	San Diego	Raponi	HG-U133A	201901_s_at	34	0.76	0.287054	-	-0.5	0.84432	0.04	1.04 [0.72 - 1.50]
GSE8970	Blood cancer	AML	Overall Survival	San Diego	Raponi	HG-U133A	201902_s_at	34	0.32	0.008504	0.142809	1.16	0.076962	0.41	1.50 [0.96 - 2.35]
GSE8970	Blood cancer	AML	Overall Survival	San Diego	Raponi	HG-U133A	213494_s_at	34	0.71	0.016558	0.234174	-1.17	0.219224	-0.41	0.67 [0.35 - 1.27]
GSE4475	Blood cancer	B-cell lymphoma	Overall Survival	Berlin (2003-2005)	Hummel	HG-U133A	200047_s_at	158	0.32	0.004632	0.089106	-0.67	0.10341	-0.36	0.70 [0.45 - 1.08]
GSE4475	Blood cancer	B-cell lymphoma	Overall Survival	Berlin (2003-2005)	Hummel	HG-U133A	201901_s_at	158	0.59	0.079919	-	-0.42	0.277283	-0.25	0.78 [0.49 - 1.23]
GSE4475	Blood cancer	B-cell lymphoma	Overall Survival	Berlin (2003-2005)	Hummel	HG-U133A	201902_s_at	158	0.47	0.053243	-	0.45	0.257371	0.8	2.23 [0.56 - 8.94]
GSE4475	Blood cancer	B-cell lymphoma	Overall Survival	Berlin (2003-2005)	Hummel	HG-U133A	213494_s_at	158	0.28	0.000154	0.005122	-0.89	0.137445	-0.84	0.43 [0.14 - 1.31]
E-TABM-346	Blood cancer	DLBCL	Event Free Survival	GELA (1998-2000)	Jais	HG-U133A	200047_s_at	53	0.21	0.120634	-	0.74	0.795339	0.15	1.16 [0.38 - 3.59]
E-TABM-346	Blood cancer	DLBCL	Overall Survival	GELA (1998-2000)	Jais	HG-U133A	200047_s_at	53	0.34	0.099867	-	0.7	0.467797	0.46	1.58 [0.46 - 5.48]
E-TABM-346	Blood cancer	DLBCL	Event Free Survival	GELA (1998-2000)	Jais	HG-U133A	201901_s_at	53	0.43	0.203057	-	0.45	0.487889	0.55	1.73 [0.37 - 8.21]
E-TABM-346	Blood cancer	DLBCL	Overall Survival	GELA (1998-2000)	Jais	HG-U133A	201901_s_at	53	0.85	0.183919	-	0.6	0.320006	0.87	2.38 [0.43 - 13.19]
E-TABM-346	Blood cancer	DLBCL	Event Free Survival	GELA (1998-2000)	Jais	HG-U133A	201902_s_at	53	0.15	0.150061	-	0.85	0.380973	0.19	1.21 [0.79 - 1.86]
E-TABM-346	Blood cancer	DLBCL	Overall Survival	GELA (1998-2000)	Jais	HG-U133A	201902_s_at	53	0.28	0.177194	-	0.61	0.601966	0.12	1.13 [0.71 - 1.80]
E-TABM-346	Blood cancer	DLBCL	Event Free Survival	GELA (1998-2000)	Jais	HG-U133A	213494_s_at	53	0.64	0.005636	0.10396	0.93	0.041633	1.28	3.59 [1.05 - 12.27]
E-TABM-346	Blood cancer	DLBCL	Overall Survival	GELA (1998-2000)	Jais	HG-U133A	213494_s_at	53	0.74	0.001509	0.035912	1.12	0.014292	1.63	5.08 [1.38 - 18.66]
GSE16131-GPL96	Blood cancer	Follicular lymphoma	Overall Survival	NCI (1974-2001)	Dave	HG-U133A	200047_s_at	180	0.2	0.034527	0.388841	-0.51	0.303023	-0.5	0.61 [0.24 - 1.57]
GSE16131-GPL96	Blood cancer	Follicular lymphoma	Overall Survival	NCI (1974-2001)	Dave	HG-U133A	201901_s_at	180	0.34	0.110702	-	-0.34	0.15687	-0.34	0.71 [0.44 - 1.14]
GSE16131-GPL96	Blood cancer	Follicular lymphoma	Overall Survival	NCI (1974-2001)	Dave	HG-U133A	201902_s_at	180	0.19	0.030282	0.356485	-0.52	0.139441	-0.17	0.84 [0.67 - 1.06]
GSE16131-GPL96	Blood cancer	Follicular lymphoma	Overall Survival	NCI (1974-2001)	Dave	HG-U133A	213494_s_at	180	0.69	0.03159	0.366681	-0.51	0.14883	-0.39	0.68 [0.40 - 1.15]
GSE16131-GPL97	Blood cancer	Follicular lymphoma	Overall Survival	NCI (1974-2001)	Dave	HG-U133B	200047_s_at	180	0.19	0.009624	0.156866	-0.61	0.280405	-0.56	0.57 [0.21 - 1.58]
GSE16131-GPL97	Blood cancer	Follicular lymphoma	Overall Survival	NCI (1974-2001)	Dave	HG-U133B	224711_at	180	0.88	0.249479	-	-0.45	0.556524	-0.22	0.80 [0.38 - 1.68]
GSE16131-GPL97	Blood cancer	Follicular lymphoma	Overall Survival	NCI (1974-2001)	Dave	HG-U133B	224718_at	180	0.83	0.023202	0.297301	-0.78	0.284708	-0.29	0.75 [0.44 - 1.28]
GSE2658	Blood cancer	Multiple myeloma	Disease Specific Survival	Arkansas	Zhan	HG-U133_Plus_2	200047_s_at	559	0.66	0.148478	-	0.29	0.416481	0.35	1.42 [0.61 - 3.28]
GSE2658	Blood cancer	Multiple myeloma	Disease Specific Survival	Arkansas	Zhan	HG-U133_Plus_2	201901_s_at	559	0.9	0.003978	0.078976	0.84	0.35168	0.34	1.41 [0.69 - 2.88]
GSE2658	Blood cancer	Multiple myeloma	Disease Specific Survival	Arkansas	Zhan	HG-U133_Plus_2	201902_s_at	559	0.86	0.116236	-	-0.78	0.956737	0.01	1.01 [0.76 - 1.34]
GSE2658	Blood cancer	Multiple myeloma	Disease Specific Survival	Arkansas	Zhan	HG-U133_Plus_2	224711_at	559	0.79	0.020126	0.269137	0.51	0.335811	0.36	1.44 [0.69 - 3.00]
GSE2658	Blood cancer	Multiple myeloma	Disease Specific Survival	Arkansas	Zhan	HG-U133_Plus_2	213494_s_at	559	0.9	0.080568	-	-0.78	0.890591	0.04	1.04 [0.62 - 1.74]
GSE2658	Blood cancer	Multiple myeloma	Disease Specific Survival	Arkansas	Zhan	HG-U133_Plus_2	224718_at	559	0.25	0.050843	-	0.44	0.792448	0.07	1.07 [0.64 - 1.80]
GSE4271-GPL96	Brain cancer	Astrocytoma	Overall Survival	MDA	Phillips	HG-U133A	200047_s_at	77	0.79	0.005373	0.100148	0.84	0.185667	0.55	1.74 [0.77 - 3.95]
GSE4271-GPL96	Brain cancer	Astrocytoma	Overall Survival	MDA	Phillips	HG-U133A	201901_s_at	77	0.75	0.040515	0.431183	0.6	0.793548	0.1	1.11 [0.52 - 2.37]
GSE4271-GPL96	Brain cancer	Astrocytoma	Overall Survival	MDA	Phillips	HG-U133A	201902_s_at	77	0.23	0.001992	0.045145	-0.88	0.169764	-0.29	0.75 [0.50 - 1.13]
GSE4271-GPL96	Brain cancer	Astrocytoma	Overall Survival	MDA	Phillips	HG-U133A	213494_s_at	77	0.23	0.195255	-	-0.37	0.685417	-0.2	0.82 [0.32 - 2.12]
GSE4271-GPL97	Brain cancer	Astrocytoma	Overall Survival	MDA	Phillips	HG-U133B	200047_s_at	77	0.35	0.016593	0.234525	0.68	0.138132	0.59	1.80 [0.83 - 3.94]
GSE4271-GPL97	Brain cancer	Astrocytoma	Overall Survival	MDA	Phillips	HG-U133B	224711_at	77	0.39	0.004352	0.084823	-0.74	0.121213	-0.71	0.49 [0.20 - 1.21]
GSE4271-GPL97	Brain cancer	Astrocytoma	Overall Survival	MDA	Phillips	HG-U133B	224718_at	77	0.25	0.013273	0.199342	-0.71	0.331844	-0.44	0.64 [0.26 - 1.57]
GSE7696	Brain cancer	Glioblastoma	Overall Survival	Lausanne	Murat	HG-U133_Plus_2	200047_s_at	70	0.37	0.179082	-	0.37	0.991711	0	1.00 [0.45 - 2.26]
GSE7696	Brain cancer	Glioblastoma	Overall Survival	Lausanne	Murat	HG-U133_Plus_2	201901_s_at	70	0.56	0.04481	0.45947	0.52	0.341563	0.34	1.41 [0.70 - 2.83]
GSE7696	Brain cancer	Glioblastoma	Overall Survival	Lausanne	Murat	HG-U133_Plus_2	201902_s_at	70	0.21	0.11401	-	-0.5	0.717976	0.31	1.37 [0.25 - 7.49]
GSE7696	Brain cancer	Glioblastoma	Overall Survival	Lausanne	Murat	HG-U133_Plus_2	213494_s_at	70	0.66	0.039206	0.422231	0.55	0.10811	0.8	2.22 [0.84 - 5.89]
GSE7696	Brain cancer	Glioblastoma	Overall Survival	Lausanne	Murat	HG-U133_Plus_2	224711_at	70	0.53	0.054622	-	0.5	0.114926	0.69	1.99 [0.85 - 4.70]
GSE7696	Brain cancer	Glioblastoma	Overall Survival	Lausanne	Murat	HG-U133_Plus_2	224718_at	70	0.36	0.096485	-	0.46	0.38594	0.39	1.47 [0.61 - 3.54]
MGH-glioma	Brain cancer	Glioma	Overall Survival	CBTTB, MGH, BWH, CH	Nutt	HG-U95A	33209_at	50	0.26	0.163135	-	-0.53	0.752259	-0.14	0.87 [0.37 - 2.05]
MGH-glioma	Brain cancer	Glioma	Overall Survival	CBTTB, MGH, BWH, CH	Nutt	HG-U95A	33210_at	50	0.74	0.035922	0.399033	-0.88	0.261193	-1.28	0.28 [0.03 - 2.60]
MGH-glioma	Brain cancer	Glioma	Overall Survival	CBTTB, MGH, BWH, CH	Nutt	HG-U95A	891_at	50	0.66	0.058277	-	0.69	0.10271	0.77	2.16 [0.86 - 5.43]
GSE4412-GPL96	Brain cancer	Glioma	Overall Survival	UCLA (1996-2003)	Freije	HG-U133A	200047_s_at	74	0.12	0.006819	0.120557	-1.02	0.573177	0.35	1.42 [0.42 - 4.80]
GSE4412-GPL96	Brain cancer	Glioma	Overall Survival	UCLA (1996-2003)	Freije	HG-U133A	201901_s_at	74	0.15	0.010231	0.164253	-0.93	0.150281	-0.97	0.38 [0.10 - 1.42]
GSE4412-GPL96	Brain cancer	Glioma	Overall Survival	UCLA (1996-2003)	Freije	HG-U133A	201902_s_at	74	0.39	0.000908	0.023496	-0.97	0.005055	-0.63	0.53 [0.34 - 0.83]
GSE4412-GPL96	Brain cancer	Glioma	Overall Survival	UCLA (1996-2003)	Freije	HG-U133A	213494_s_at	74	0.84	0.001536	0.036437	1.11	0.64475	0.32	1.38 [0.35 - 5.41]
GSE4412-GPL97	Brain cancer	Glioma	Overall Survival	UCLA (1996-2003)	Freije	HG-U133B	200047_s_at	74	0.88	0.259851	-	0.46	0.956101	-0.03	0.97 [0.29 - 3.23]
GSE4412-GPL97	Brain cancer	Glioma	Overall Survival	UCLA (1996-2003)	Freije	HG-U133B	224711_at	74	0.85	0.037412	0.40969	-0.98	0.292138	-0.72	0.49 [0.13 - 1.86]
GSE4412-GPL97	Brain cancer	Glioma	Overall Survival	UCLA (1996-2003)	Freije	HG-U133B	224718_at	74	0.46	0.000683	0.018482	-1.01	0.034375	-1.03	0.36 [0.14 - 0.93]
GSE16581	Brain cancer	Meningioma	Overall Survival	UCLA	Lee	HG-U133_Plus_2	200047_s_at	67	0.19	0.001107	0.027748	-1.91	0.083547	-2.69	0.07 [0.00 - 1.43]
GSE16581	Brain cancer	Meningioma	Overall Survival	UCLA	Lee	HG-U133_Plus_2	201901_s_at	67	0.52	0.023789	0.302494	-2.04	0.102119	-2.67	0.07 [0.00 - 1.70]
GSE16581	Brain cancer	Meningioma	Overall Survival	UCLA	Lee	HG-U133_Plus_2	213494_s_at	67	0.18	0.078803	-	-1.13	0.239928	-2.23	0.11 [0.00 - 4.43]
GSE16581	Brain cancer	Meningioma	Overall Survival	UCLA	Lee	HG-U133_Plus_2	201902_s_at	67	0.79	0.125214	-	-15.38	0.505995	-0.79	0.45 [0.04 - 4.64]
GSE16581	Brain cancer	Meningioma	Overall Survival	UCLA	Lee	HG-U133_Plus_2	224718_at	67	0.69	0.044853	0.459746	-15.62	0.10164	-1.93	0.15 [0.01 - 1.46]
GSE16581	Brain cancer	Meningioma	Overall Survival	UCLA	Lee	HG-U133_Plus_2	224711_at	67	0.45	0.023029	0.295763	-1.64	0.118205	-2.34	0.10 [0.01 - 1.82]
GSE19615	Breast cancer		Distant Metastasis Free Survival	DF/HCC	Li	HG-U133_Plus_2	224718_at	115	0.41	0.012212	0.187451	-1.37	0.022129	-1.86	0.16 [0.03 - 0.77]
GSE19615	Breast cancer		Distant Metastasis Free Survival	DF/HCC	Li	HG-U133_Plus_2	201902_s_at	115	0.6	0.127027	-	-0.96	0.708402	-0.26	0.77 [0.20 - 2.96]
GSE19615	Breast cancer		Distant Metastasis Free Survival	DF/HCC	Li	HG-U133_Plus_2	213494_s_at	115	0.85	0.000764	0.020327	1.63	0.175724	0.9	2.46 [0.67 - 9.06]
GSE19615	Breast cancer		Distant Metastasis Free Survival	DF/HCC	Li	HG-U133_Plus_2	224711_at	115	0.67	0.030797	0.360527	-1.93	0.161643	-1.38	0.25 [0.04 - 1.74]
GSE19615	Breast cancer		Distant Metastasis Free Survival	DF/HCC	Li	HG-U133_Plus_2	200047_s_at	115	0.13	0.006185	0.111771	-1.41	0.609497	-0.66	0.52 [0.04 - 6.52]
GSE19615	Breast cancer		Distant Metastasis Free Survival	DF/HCC	Li	HG-U133_Plus_2	201901_s_at	115	0.1	0.017586	0.244521	-1.31	0.550118	-0.76	0.47 [0.04 - 5.66]
GSE3143	Breast cancer		Overall Survival	Duke	Bild	HG-U95A	33209_at	158	0.13	0.027208	0.331663	-0.74	0.595288	-0.13	0.88 [0.54 - 1.43]
GSE3143	Breast cancer		Overall Survival	Duke	Bild	HG-U95A	33210_at	158	0.68	0.095388	-	0.48	0.973594	-0.01	0.99 [0.59 - 1.65]
GSE3143	Breast cancer		Overall Survival	Duke	Bild	HG-U95A	891_at	158	0.11	0.070293	-	-0.66	0.64797	-0.17	0.85 [0.41 - 1.74]
GSE7849	Breast cancer		Disease Free Survival	Duke (1990-2001)	Anders	HG-U95A	33209_at	76	0.62	0.308454	-	-0.59	0.661619	-0.18	0.83 [0.36 - 1.90]
GSE7849	Breast cancer		Disease Free Survival	Duke (1990-2001)	Anders	HG-U95A	33210_at	76	0.61	0.292338	-	-0.61	0.705848	-0.15	0.86 [0.40 - 1.86]
GSE7849	Breast cancer		Disease Free Survival	Duke (1990-2001)	Anders	HG-U95A	891_at	76	0.24	0.088746	-	1.59	0.875129	0.11	1.12 [0.27 - 4.64]
GSE12276	Breast cancer		Relapse Free Survival	EMC	Bos	HG-U133_Plus_2	200047_s_at	204	0.38	0.000513	0.014475	0.5	0.01315	0.7	2.01 [1.16 - 3.48]
GSE12276	Breast cancer		Relapse Free Survival	EMC	Bos	HG-U133_Plus_2	201901_s_at	204	0.62	0.165093	-	-0.2	0.587565	-0.16	0.86 [0.49 - 1.50]
GSE12276	Breast cancer		Relapse Free Survival	EMC	Bos	HG-U133_Plus_2	201902_s_at	204	0.38	0.001004	0.025581	0.49	0.071136	0.16	1.18 [0.99 - 1.41]
GSE12276	Breast cancer		Relapse Free Survival	EMC	Bos	HG-U133_Plus_2	213494_s_at	204	0.76	0.064926	-	0.3	0.83887	0.05	1.05 [0.65 - 1.70]
GSE12276	Breast cancer		Relapse Free Survival	EMC	Bos	HG-U133_Plus_2	224711_at	204	0.1	0.088848	-	-0.39	0.419455	-0.18	0.83 [0.54 - 1.30]
GSE12276	Breast cancer		Relapse Free Survival	EMC	Bos	HG-U133_Plus_2	224718_at	204	0.11	0.052745	-	0.43	0.364834	0.15	1.17 [0.84 - 1.63]
GSE6532-GPL570	Breast cancer		Distant Metastasis Free Survival	GUYT	Loi	HG-U133_Plus_2	213494_s_at	87	0.69	0.018877	0.257194	0.87	0.190509	0.52	1.69 [0.77 - 3.68]
GSE6532-GPL570	Breast cancer		Relapse Free Survival	GUYT	Loi	HG-U133_Plus_2	224718_at	87	0.77	0.000253	0.007879	1.32	0.243931	0.61	1.84 [0.66 - 5.14]
GSE6532-GPL570	Breast cancer		Distant Metastasis Free Survival	GUYT	Loi	HG-U133_Plus_2	224711_at	87	0.86	0.000751	0.02003	1.33	0.410986	0.5	1.65 [0.50 - 5.40]
GSE6532-GPL570	Breast cancer		Relapse Free Survival	GUYT	Loi	HG-U133_Plus_2	224711_at	87	0.86	0.000751	0.02003	1.33	0.410986	0.5	1.65 [0.50 - 5.40]
GSE6532-GPL570	Breast cancer		Distant Metastasis Free Survival	GUYT	Loi	HG-U133_Plus_2	201902_s_at	87	0.87	0.001762	0.040822	1.39	0.123045	1.09	2.98 [0.74 - 11.98]
GSE6532-GPL570	Breast cancer		Relapse Free Survival	GUYT	Loi	HG-U133_Plus_2	213494_s_at	87	0.69	0.018877	0.257194	0.87	0.190509	0.52	1.69 [0.77 - 3.68]
GSE6532-GPL570	Breast cancer		Distant Metastasis Free Survival	GUYT	Loi	HG-U133_Plus_2	224718_at	87	0.77	0.000253	0.007879	1.32	0.243931	0.61	1.84 [0.66 - 5.14]
GSE6532-GPL570	Breast cancer		Relapse Free Survival	GUYT	Loi	HG-U133_Plus_2	200047_s_at	87	0.84	0.013679	0.203805	0.99	0.17738	1.04	2.84 [0.62 - 12.89]
GSE6532-GPL570	Breast cancer		Distant Metastasis Free Survival	GUYT	Loi	HG-U133_Plus_2	200047_s_at	87	0.84	0.013679	0.203805	0.99	0.17738	1.04	2.84 [0.62 - 12.89]
GSE6532-GPL570	Breast cancer		Relapse Free Survival	GUYT	Loi	HG-U133_Plus_2	201901_s_at	87	0.18	0.047182	0.474429	1.35	0.143402	0.7	2.00 [0.79 - 5.08]
GSE6532-GPL570	Breast cancer		Distant Metastasis Free Survival	GUYT	Loi	HG-U133_Plus_2	201901_s_at	87	0.18	0.047182	0.474429	1.35	0.143402	0.7	2.00 [0.79 - 5.08]
GSE6532-GPL570	Breast cancer		Relapse Free Survival	GUYT	Loi	HG-U133_Plus_2	201902_s_at	87	0.87	0.001762	0.040822	1.39	0.123045	1.09	2.98 [0.74 - 11.98]
GSE9195	Breast cancer		Relapse Free Survival	GUYT2	Loi	HG-U133_Plus_2	200047_s_at	77	0.23	0.034067	0.385434	15.48	0.997115	0	1.00 [0.14 - 6.93]
GSE9195	Breast cancer		Distant Metastasis Free Survival	GUYT2	Loi	HG-U133_Plus_2	200047_s_at	77	0.23	0.066608	-	15.47	0.617183	0.57	1.78 [0.19 - 16.87]
GSE9195	Breast cancer		Relapse Free Survival	GUYT2	Loi	HG-U133_Plus_2	201901_s_at	77	0.25	0.026977	0.329744	15.52	0.24371	0.75	2.11 [0.60 - 7.43]
GSE9195	Breast cancer		Distant Metastasis Free Survival	GUYT2	Loi	HG-U133_Plus_2	201901_s_at	77	0.42	0.032576	0.37423	1.94	0.103285	1.31	3.71 [0.77 - 18.00]
GSE9195	Breast cancer		Relapse Free Survival	GUYT2	Loi	HG-U133_Plus_2	201902_s_at	77	0.73	0.01832	0.251776	-15.59	0.55057	-0.65	0.52 [0.06 - 4.42]
GSE9195	Breast cancer		Distant Metastasis Free Survival	GUYT2	Loi	HG-U133_Plus_2	224711_at	77	0.81	0.093984	-	-15.4	0.968543	0.03	1.03 [0.19 - 5.49]
GSE9195	Breast cancer		Distant Metastasis Free Survival	GUYT2	Loi	HG-U133_Plus_2	224718_at	77	0.36	0.081309	-	1.65	0.661395	0.36	1.43 [0.29 - 7.04]
GSE9195	Breast cancer		Distant Metastasis Free Survival	GUYT2	Loi	HG-U133_Plus_2	213494_s_at	77	0.25	0.049598	0.489205	15.54	0.157476	1.41	4.08 [0.58 - 28.64]
GSE9195	Breast cancer		Relapse Free Survival	GUYT2	Loi	HG-U133_Plus_2	213494_s_at	77	0.14	0.112897	-	15.29	0.324373	0.78	2.19 [0.46 - 10.37]
GSE9195	Breast cancer		Distant Metastasis Free Survival	GUYT2	Loi	HG-U133_Plus_2	201902_s_at	77	0.71	0.034589	0.389299	-15.61	0.52451	-0.8	0.45 [0.04 - 5.23]
GSE9195	Breast cancer		Relapse Free Survival	GUYT2	Loi	HG-U133_Plus_2	224711_at	77	0.81	0.055575	-	-15.41	0.479336	-0.53	0.59 [0.14 - 2.55]
GSE9195	Breast cancer		Relapse Free Survival	GUYT2	Loi	HG-U133_Plus_2	224718_at	77	0.81	0.058765	-	-15.39	0.987124	0.01	1.01 [0.26 - 3.99]
GSE12093	Breast cancer		Distant Metastasis Free Survival	IO, NCI, TUM, CCF (1992-2000)	Zhang	HG-U133A	200047_s_at	136	0.84	0.003431	0.070173	1.26	0.001146	2.01	7.44 [2.22 - 24.96]
GSE12093	Breast cancer		Distant Metastasis Free Survival	IO, NCI, TUM, CCF (1992-2000)	Zhang	HG-U133A	201901_s_at	136	0.39	0.042651	0.445454	1.2	0.068339	1.35	3.86 [0.90 - 16.48]
GSE12093	Breast cancer		Distant Metastasis Free Survival	IO, NCI, TUM, CCF (1992-2000)	Zhang	HG-U133A	201902_s_at	136	0.89	0.030788	0.360454	1.07	0.285066	0.28	1.33 [0.79 - 2.23]
GSE12093	Breast cancer		Distant Metastasis Free Survival	IO, NCI, TUM, CCF (1992-2000)	Zhang	HG-U133A	213494_s_at	136	0.11	0.023025	0.295726	-1.13	0.981167	-0.01	0.99 [0.38 - 2.58]
GSE11121	Breast cancer		Distant Metastasis Free Survival	Mainz (1988-1998)	Schmidt	HG-U133A	200047_s_at	200	0.62	0.035007	0.392374	0.61	0.87906	-0.14	0.87 [0.15 - 5.17]
GSE11121	Breast cancer		Distant Metastasis Free Survival	Mainz (1988-1998)	Schmidt	HG-U133A	201901_s_at	200	0.72	0.000174	0.005698	1.09	0.006612	1.75	5.76 [1.63 - 20.40]
GSE11121	Breast cancer		Distant Metastasis Free Survival	Mainz (1988-1998)	Schmidt	HG-U133A	201902_s_at	200	0.9	0.149032	-	-1	0.602423	-0.09	0.91 [0.64 - 1.30]
GSE11121	Breast cancer		Distant Metastasis Free Survival	Mainz (1988-1998)	Schmidt	HG-U133A	213494_s_at	200	0.86	0.000132	0.004475	1.19	0.107085	0.9	2.45 [0.82 - 7.29]
GSE1378	Breast cancer		Relapse Free Survival	MGH (1987-2000)	Ma	Arcturus 22k	17948	60	0.88	0.000198	0.006384	1.63	0.03709	0.88	2.41 [1.05 - 5.51]
GSE1378	Breast cancer		Relapse Free Survival	MGH (1987-2000)	Ma	Arcturus 22k	21577	60	0.87	0.077208	-	0.86	0.851273	0.06	1.06 [0.59 - 1.90]
GSE1379	Breast cancer		Relapse Free Survival	MGH (1987-2000)	Ma	Arcturus 22k	17948	60	0.32	0.084816	-	0.83	0.513894	0.2	1.22 [0.68 - 2.19]
GSE1379	Breast cancer		Relapse Free Survival	MGH (1987-2000)	Ma	Arcturus 22k	21577	60	0.48	0.270103	-	0.42	0.991257	0	1.00 [0.48 - 2.06]
GSE9893	Breast cancer		Overall Survival	Montpellier, Bordeaux, Turin (1989-2001)	Chanrion	MLRG Human 21K V12.0	12640	155	0.86	3.7e-05	0.001438	1.17	0.000692	0.21	1.23 [1.09 - 1.38]
GSE2034	Breast cancer		Distant Metastasis Free Survival	Rotterdam (1980-1995)	Wang	HG-U133A	200047_s_at	286	0.21	0.008539	0.143261	0.74	0.009571	0.87	2.39 [1.24 - 4.62]
GSE2034	Breast cancer		Distant Metastasis Free Survival	Rotterdam (1980-1995)	Wang	HG-U133A	201901_s_at	286	0.38	0.015933	0.227757	-0.46	0.095563	-0.49	0.61 [0.35 - 1.09]
GSE2034	Breast cancer		Distant Metastasis Free Survival	Rotterdam (1980-1995)	Wang	HG-U133A	201902_s_at	286	0.75	0.012279	0.188209	0.51	0.271985	0.16	1.17 [0.88 - 1.55]
GSE2034	Breast cancer		Distant Metastasis Free Survival	Rotterdam (1980-1995)	Wang	HG-U133A	213494_s_at	286	0.14	0.000244	0.00764	-0.82	0.001729	-0.89	0.41 [0.24 - 0.72]
GSE1456-GPL96	Breast cancer		Overall Survival	Stockholm (1994-1996)	Pawitan	HG-U133A	200047_s_at	159	0.89	0.047688	0.477561	0.8	0.738908	0.21	1.24 [0.35 - 4.34]
GSE1456-GPL96	Breast cancer		Relapse Free Survival	Stockholm (1994-1996)	Pawitan	HG-U133A	200047_s_at	159	0.73	0.025631	0.318425	0.71	0.682392	0.26	1.30 [0.37 - 4.52]
GSE1456-GPL96	Breast cancer		Disease Specific Survival	Stockholm (1994-1996)	Pawitan	HG-U133A	200047_s_at	159	0.89	0.098631	-	0.79	0.820864	0.17	1.19 [0.27 - 5.20]
GSE1456-GPL96	Breast cancer		Overall Survival	Stockholm (1994-1996)	Pawitan	HG-U133A	201901_s_at	159	0.17	0.032349	0.372502	-0.74	0.173255	-0.58	0.56 [0.24 - 1.29]
GSE1456-GPL96	Breast cancer		Relapse Free Survival	Stockholm (1994-1996)	Pawitan	HG-U133A	201901_s_at	159	0.14	0.003109	0.064822	-1.01	0.042794	-0.91	0.40 [0.17 - 0.97]
GSE1456-GPL96	Breast cancer		Disease Specific Survival	Stockholm (1994-1996)	Pawitan	HG-U133A	201901_s_at	159	0.14	0.017428	0.242953	-0.95	0.077597	-0.87	0.42 [0.16 - 1.10]
GSE1456-GPL96	Breast cancer		Overall Survival	Stockholm (1994-1996)	Pawitan	HG-U133A	201902_s_at	159	0.87	0.094596	-	0.65	0.981311	0.01	1.01 [0.65 - 1.54]
GSE1456-GPL96	Breast cancer		Relapse Free Survival	Stockholm (1994-1996)	Pawitan	HG-U133A	201902_s_at	159	0.88	0.015594	0.224237	0.89	0.681574	0.09	1.09 [0.71 - 1.68]
GSE1456-GPL96	Breast cancer		Disease Specific Survival	Stockholm (1994-1996)	Pawitan	HG-U133A	201902_s_at	159	0.88	0.020179	0.269637	0.97	0.915253	0.03	1.03 [0.62 - 1.70]
GSE1456-GPL96	Breast cancer		Overall Survival	Stockholm (1994-1996)	Pawitan	HG-U133A	213494_s_at	159	0.31	0.016963	0.238283	-0.74	0.439211	-0.5	0.61 [0.17 - 2.14]
GSE1456-GPL96	Breast cancer		Relapse Free Survival	Stockholm (1994-1996)	Pawitan	HG-U133A	213494_s_at	159	0.28	0.025683	0.318866	-0.71	0.806297	-0.16	0.85 [0.24 - 3.02]
GSE1456-GPL96	Breast cancer		Disease Specific Survival	Stockholm (1994-1996)	Pawitan	HG-U133A	213494_s_at	159	0.28	0.041362	0.436891	-0.75	0.606651	-0.39	0.68 [0.15 - 2.97]
GSE1456-GPL97	Breast cancer		Overall Survival	Stockholm (1994-1996)	Pawitan	HG-U133B	200047_s_at	159	0.9	0.003025	0.063409	1.12	0.169739	0.84	2.31 [0.70 - 7.61]
GSE1456-GPL97	Breast cancer		Relapse Free Survival	Stockholm (1994-1996)	Pawitan	HG-U133B	200047_s_at	159	0.87	3e-06	0.000158	1.48	0.044884	1.23	3.41 [1.03 - 11.32]
GSE1456-GPL97	Breast cancer		Disease Specific Survival	Stockholm (1994-1996)	Pawitan	HG-U133B	200047_s_at	159	0.88	0.00582	0.1066	1.14	0.155998	1.03	2.79 [0.68 - 11.50]
GSE1456-GPL97	Breast cancer		Overall Survival	Stockholm (1994-1996)	Pawitan	HG-U133B	224711_at	159	0.18	0.002656	0.057076	-0.98	0.136283	-0.95	0.39 [0.11 - 1.35]
GSE1456-GPL97	Breast cancer		Relapse Free Survival	Stockholm (1994-1996)	Pawitan	HG-U133B	224711_at	159	0.11	0.021803	0.2847	-0.84	0.518805	-0.42	0.66 [0.18 - 2.37]
GSE1456-GPL97	Breast cancer		Disease Specific Survival	Stockholm (1994-1996)	Pawitan	HG-U133B	224711_at	159	0.18	0.000759	0.020195	-1.22	0.206307	-0.95	0.39 [0.09 - 1.68]
GSE1456-GPL97	Breast cancer		Overall Survival	Stockholm (1994-1996)	Pawitan	HG-U133B	224718_at	159	0.47	0.010771	0.170718	-0.82	0.183517	-0.51	0.60 [0.28 - 1.28]
GSE1456-GPL97	Breast cancer		Relapse Free Survival	Stockholm (1994-1996)	Pawitan	HG-U133B	224718_at	159	0.35	0.024271	0.306715	-0.7	0.308709	-0.4	0.67 [0.31 - 1.45]
GSE1456-GPL97	Breast cancer		Disease Specific Survival	Stockholm (1994-1996)	Pawitan	HG-U133B	224718_at	159	0.35	0.025164	0.314437	-0.81	0.347722	-0.43	0.65 [0.27 - 1.59]
GSE7378	Breast cancer		Disease Free Survival	UCSF	Zhou	U133AAofAv2	200047_s_at	54	0.78	0.01769	0.245557	1.47	0.044207	2.41	11.08 [1.06 - 115.38]
GSE7378	Breast cancer		Disease Free Survival	UCSF	Zhou	U133AAofAv2	201901_s_at	54	0.81	0.002525	0.05479	1.81	0.018844	2.34	10.42 [1.47 - 73.70]
GSE7378	Breast cancer		Disease Free Survival	UCSF	Zhou	U133AAofAv2	201902_s_at	54	0.59	0.049136	0.486417	1.32	0.833766	0.22	1.24 [0.17 - 9.25]
GSE7378	Breast cancer		Disease Free Survival	UCSF	Zhou	U133AAofAv2	213494_s_at	54	0.85	4e-06	0.000182	2.6	0.020856	2.46	11.71 [1.45 - 94.40]
E-TABM-158	Breast cancer		Distant Metastasis Free Survival	UCSF, CPMC (1989-1997)	Chin	HG-U133A	200047_s_at	117	0.73	0.085086	-	-0.9	0.838733	-0.08	0.92 [0.43 - 1.99]
E-TABM-158	Breast cancer		Relapse Free Survival	UCSF, CPMC (1989-1997)	Chin	HG-U133A	200047_s_at	117	0.73	0.034781	0.390718	-0.88	0.724702	-0.1	0.91 [0.52 - 1.57]
E-TABM-158	Breast cancer		Overall Survival	UCSF, CPMC (1989-1997)	Chin	HG-U133A	200047_s_at	117	0.73	0.034781	0.390718	-0.88	0.724702	-0.1	0.91 [0.52 - 1.57]
E-TABM-158	Breast cancer		Disease Specific Survival	UCSF, CPMC (1989-1997)	Chin	HG-U133A	200047_s_at	117	0.73	0.065901	-	-0.96	0.809631	-0.08	0.92 [0.46 - 1.82]
E-TABM-158	Breast cancer		Distant Metastasis Free Survival	UCSF, CPMC (1989-1997)	Chin	HG-U133A	201901_s_at	117	0.14	0.340097	-	-0.47	0.974719	0.02	1.02 [0.40 - 2.60]
E-TABM-158	Breast cancer		Relapse Free Survival	UCSF, CPMC (1989-1997)	Chin	HG-U133A	201901_s_at	117	0.2	0.181054	-	-0.47	0.967701	0.01	1.01 [0.49 - 2.08]
E-TABM-158	Breast cancer		Overall Survival	UCSF, CPMC (1989-1997)	Chin	HG-U133A	201901_s_at	117	0.2	0.181054	-	-0.47	0.967701	0.01	1.01 [0.49 - 2.08]
E-TABM-158	Breast cancer		Disease Specific Survival	UCSF, CPMC (1989-1997)	Chin	HG-U133A	201901_s_at	117	0.18	0.330923	-	-0.42	0.918067	0.05	1.05 [0.44 - 2.49]
E-TABM-158	Breast cancer		Distant Metastasis Free Survival	UCSF, CPMC (1989-1997)	Chin	HG-U133A	201902_s_at	117	0.47	0.001102	0.027638	-1.4	0.042371	-1.87	0.15 [0.03 - 0.94]
E-TABM-158	Breast cancer		Relapse Free Survival	UCSF, CPMC (1989-1997)	Chin	HG-U133A	201902_s_at	117	0.44	0.050493	-	-0.62	0.138143	-1.01	0.36 [0.10 - 1.38]
E-TABM-158	Breast cancer		Overall Survival	UCSF, CPMC (1989-1997)	Chin	HG-U133A	201902_s_at	117	0.44	0.050493	-	-0.62	0.138143	-1.01	0.36 [0.10 - 1.38]
E-TABM-158	Breast cancer		Disease Specific Survival	UCSF, CPMC (1989-1997)	Chin	HG-U133A	201902_s_at	117	0.46	0.026836	0.328578	-0.87	0.155589	-1.17	0.31 [0.06 - 1.56]
E-TABM-158	Breast cancer		Distant Metastasis Free Survival	UCSF, CPMC (1989-1997)	Chin	HG-U133A	213494_s_at	117	0.9	0.05071	-	-15.23	0.192555	-0.91	0.40 [0.10 - 1.58]
E-TABM-158	Breast cancer		Relapse Free Survival	UCSF, CPMC (1989-1997)	Chin	HG-U133A	213494_s_at	117	0.89	0.006961	0.122496	-15.29	0.234264	-0.66	0.52 [0.17 - 1.53]
E-TABM-158	Breast cancer		Overall Survival	UCSF, CPMC (1989-1997)	Chin	HG-U133A	213494_s_at	117	0.89	0.006961	0.122496	-15.29	0.234264	-0.66	0.52 [0.17 - 1.53]
E-TABM-158	Breast cancer		Disease Specific Survival	UCSF, CPMC (1989-1997)	Chin	HG-U133A	213494_s_at	117	0.89	0.031604	0.366794	-15.25	0.329657	-0.65	0.52 [0.14 - 1.93]
GSE3494-GPL96	Breast cancer		Disease Specific Survival	Uppsala (1987-1989)	Miller	HG-U133A	200047_s_at	236	0.84	3e-06	0.000127	1.27	0.047761	1.32	3.73 [1.01 - 13.74]
GSE3494-GPL96	Breast cancer		Disease Specific Survival	Uppsala (1987-1989)	Miller	HG-U133A	201901_s_at	236	0.24	0.020668	0.274224	0.96	0.075049	0.88	2.41 [0.92 - 6.32]
GSE3494-GPL96	Breast cancer		Disease Specific Survival	Uppsala (1987-1989)	Miller	HG-U133A	201902_s_at	236	0.61	0.003431	0.070174	-0.9	0.280591	-0.23	0.79 [0.52 - 1.21]
GSE3494-GPL96	Breast cancer		Disease Specific Survival	Uppsala (1987-1989)	Miller	HG-U133A	213494_s_at	236	0.38	0.014509	0.212778	0.76	0.121798	0.98	2.65 [0.77 - 9.13]
GSE3494-GPL97	Breast cancer		Disease Specific Survival	Uppsala (1987-1989)	Miller	HG-U133B	200047_s_at	236	0.75	0.022441	0.290491	0.63	0.083074	0.91	2.48 [0.89 - 6.90]
GSE3494-GPL97	Breast cancer		Disease Specific Survival	Uppsala (1987-1989)	Miller	HG-U133B	224711_at	236	0.16	0.032211	0.371452	-0.67	0.839438	0.12	1.13 [0.35 - 3.65]
GSE3494-GPL97	Breast cancer		Disease Specific Survival	Uppsala (1987-1989)	Miller	HG-U133B	224718_at	236	0.64	0.228697	-	0.33	0.833911	0.09	1.09 [0.48 - 2.46]
GSE4922-GPL96	Breast cancer		Disease Free Survival	Uppsala (1987-1989)	Ivshina	HG-U133A	200047_s_at	249	0.83	1e-06	7.1e-05	1.09	0.003569	1.62	5.03 [1.70 - 14.93]
GSE4922-GPL96	Breast cancer		Disease Free Survival	Uppsala (1987-1989)	Ivshina	HG-U133A	201901_s_at	249	0.88	0.017117	0.239827	0.65	0.08227	0.69	1.99 [0.92 - 4.33]
GSE4922-GPL96	Breast cancer		Disease Free Survival	Uppsala (1987-1989)	Ivshina	HG-U133A	201902_s_at	249	0.34	0.190664	-	0.31	0.915095	0.02	1.02 [0.73 - 1.42]
GSE4922-GPL96	Breast cancer		Disease Free Survival	Uppsala (1987-1989)	Ivshina	HG-U133A	213494_s_at	249	0.19	0.154219	-	0.42	0.749739	0.16	1.18 [0.44 - 3.18]
GSE4922-GPL97	Breast cancer		Disease Free Survival	Uppsala (1987-1989)	Ivshina	HG-U133B	200047_s_at	249	0.76	0.000551	0.015401	0.75	0.001831	1.36	3.90 [1.66 - 9.18]
GSE4922-GPL97	Breast cancer		Disease Free Survival	Uppsala (1987-1989)	Ivshina	HG-U133B	224711_at	249	0.81	0.003445	0.070397	0.68	0.819625	0.11	1.12 [0.42 - 2.95]
GSE4922-GPL97	Breast cancer		Disease Free Survival	Uppsala (1987-1989)	Ivshina	HG-U133B	224718_at	249	0.69	0.074821	-	0.39	0.766446	0.1	1.11 [0.57 - 2.16]
GSE2990	Breast cancer		Distant Metastasis Free Survival	Uppsala, Oxford	Sotiriou	HG-U133A	200047_s_at	125	0.34	0.046373	0.469383	1.04	0.248027	0.32	1.38 [0.80 - 2.39]
GSE2990	Breast cancer		Distant Metastasis Free Survival	Uppsala, Oxford	Sotiriou	HG-U133A	200047_s_at	54	0.48	0.282034	-	-0.65	0.908731	0.09	1.09 [0.24 - 4.94]
GSE2990	Breast cancer		Relapse Free Survival	Uppsala, Oxford	Sotiriou	HG-U133A	200047_s_at	125	0.42	0.082829	-	0.59	0.236172	0.26	1.29 [0.85 - 1.97]
GSE2990	Breast cancer		Relapse Free Survival	Uppsala, Oxford	Sotiriou	HG-U133A	200047_s_at	62	0.5	0.367367	-	-0.44	0.71945	0.22	1.25 [0.37 - 4.23]
GSE2990	Breast cancer		Distant Metastasis Free Survival	Uppsala, Oxford	Sotiriou	HG-U133A	201901_s_at	125	0.87	0.022322	0.289413	1.01	0.951447	-0.03	0.97 [0.39 - 2.42]
GSE2990	Breast cancer		Distant Metastasis Free Survival	Uppsala, Oxford	Sotiriou	HG-U133A	201901_s_at	54	0.26	0.248955	-	1.15	0.891366	-0.05	0.95 [0.48 - 1.88]
GSE2990	Breast cancer		Relapse Free Survival	Uppsala, Oxford	Sotiriou	HG-U133A	201901_s_at	125	0.87	0.001612	0.037934	1.08	0.385621	0.31	1.36 [0.68 - 2.72]
GSE2990	Breast cancer		Relapse Free Survival	Uppsala, Oxford	Sotiriou	HG-U133A	201901_s_at	62	0.16	0.232149	-	1.16	0.93915	-0.02	0.98 [0.56 - 1.71]
GSE2990	Breast cancer		Distant Metastasis Free Survival	Uppsala, Oxford	Sotiriou	HG-U133A	201902_s_at	125	0.86	0.05058	-	-1.76	0.467841	-0.73	0.48 [0.07 - 3.44]
GSE2990	Breast cancer		Distant Metastasis Free Survival	Uppsala, Oxford	Sotiriou	HG-U133A	201902_s_at	54	0.22	0.058733	-	15.44	0.784768	-0.08	0.92 [0.52 - 1.65]
GSE2990	Breast cancer		Relapse Free Survival	Uppsala, Oxford	Sotiriou	HG-U133A	201902_s_at	125	0.81	0.008776	0.146274	-1.18	0.18311	-1.02	0.36 [0.08 - 1.62]
GSE2990	Breast cancer		Relapse Free Survival	Uppsala, Oxford	Sotiriou	HG-U133A	201902_s_at	62	0.24	0.077143	-	1.63	0.7413	-0.08	0.92 [0.57 - 1.49]
GSE2990	Breast cancer		Distant Metastasis Free Survival	Uppsala, Oxford	Sotiriou	HG-U133A	213494_s_at	125	0.12	0.000813	0.021405	-1.27	0.549386	-0.39	0.68 [0.19 - 2.44]
GSE2990	Breast cancer		Distant Metastasis Free Survival	Uppsala, Oxford	Sotiriou	HG-U133A	213494_s_at	54	0.46	0.017631	0.24497	2.1	0.983911	-0.01	0.99 [0.61 - 1.63]
GSE2990	Breast cancer		Relapse Free Survival	Uppsala, Oxford	Sotiriou	HG-U133A	213494_s_at	125	0.82	0.003242	0.067057	0.97	0.86333	0.09	1.09 [0.41 - 2.93]
GSE2990	Breast cancer		Relapse Free Survival	Uppsala, Oxford	Sotiriou	HG-U133A	213494_s_at	62	0.52	0.094624	-	0.87	0.915004	0.02	1.02 [0.69 - 1.52]
GSE7390	Breast cancer		Relapse Free Survival	Uppsala, Oxford, Stockholm, IGR, GUYT, CRH (1980-1998)	Desmedt	HG-U133A	200047_s_at	198	0.81	0.060854	-	0.46	0.453074	0.25	1.28 [0.67 - 2.47]
GSE7390	Breast cancer		Distant Metastasis Free Survival	Uppsala, Oxford, Stockholm, IGR, GUYT, CRH (1980-1998)	Desmedt	HG-U133A	200047_s_at	198	0.81	0.002147	0.047995	0.84	0.289702	0.44	1.55 [0.69 - 3.46]
GSE7390	Breast cancer		Overall Survival	Uppsala, Oxford, Stockholm, IGR, GUYT, CRH (1980-1998)	Desmedt	HG-U133A	200047_s_at	198	0.81	0.00074	0.019768	0.93	0.182812	0.57	1.77 [0.76 - 4.11]
GSE7390	Breast cancer		Relapse Free Survival	Uppsala, Oxford, Stockholm, IGR, GUYT, CRH (1980-1998)	Desmedt	HG-U133A	201901_s_at	198	0.85	0.020871	0.276115	-0.88	0.254766	-0.27	0.77 [0.48 - 1.21]
GSE7390	Breast cancer		Distant Metastasis Free Survival	Uppsala, Oxford, Stockholm, IGR, GUYT, CRH (1980-1998)	Desmedt	HG-U133A	201901_s_at	198	0.85	0.077151	-	-0.8	0.993303	0	1.00 [0.57 - 1.77]
GSE7390	Breast cancer		Overall Survival	Uppsala, Oxford, Stockholm, IGR, GUYT, CRH (1980-1998)	Desmedt	HG-U133A	201901_s_at	198	0.85	0.112037	-	-0.73	0.891213	0.04	1.04 [0.57 - 1.92]
GSE7390	Breast cancer		Relapse Free Survival	Uppsala, Oxford, Stockholm, IGR, GUYT, CRH (1980-1998)	Desmedt	HG-U133A	201902_s_at	198	0.85	0.041409	0.437205	0.55	0.912997	0.01	1.01 [0.83 - 1.23]
GSE7390	Breast cancer		Distant Metastasis Free Survival	Uppsala, Oxford, Stockholm, IGR, GUYT, CRH (1980-1998)	Desmedt	HG-U133A	201902_s_at	198	0.87	0.010145	0.163218	0.79	0.841669	0.02	1.02 [0.81 - 1.30]
GSE7390	Breast cancer		Overall Survival	Uppsala, Oxford, Stockholm, IGR, GUYT, CRH (1980-1998)	Desmedt	HG-U133A	201902_s_at	198	0.9	0.002879	0.060928	0.97	0.467542	0.09	1.10 [0.85 - 1.41]
GSE7390	Breast cancer		Relapse Free Survival	Uppsala, Oxford, Stockholm, IGR, GUYT, CRH (1980-1998)	Desmedt	HG-U133A	213494_s_at	198	0.86	0.090166	-	-0.59	0.679947	-0.1	0.91 [0.57 - 1.44]
GSE7390	Breast cancer		Distant Metastasis Free Survival	Uppsala, Oxford, Stockholm, IGR, GUYT, CRH (1980-1998)	Desmedt	HG-U133A	213494_s_at	198	0.86	0.099868	-	-0.75	0.709318	-0.11	0.90 [0.51 - 1.58]
GSE7390	Breast cancer		Overall Survival	Uppsala, Oxford, Stockholm, IGR, GUYT, CRH (1980-1998)	Desmedt	HG-U133A	213494_s_at	198	0.86	0.034619	0.389521	-1.18	0.443124	-0.23	0.79 [0.44 - 1.44]
GSE12945	Colorectal cancer		Disease Free Survival	Berlin	Staub	HG-U133A	200047_s_at	51	0.8	0.190211	-	1.13	0.854043	0.19	1.21 [0.16 - 8.99]
GSE12945	Colorectal cancer		Overall Survival	Berlin	Staub	HG-U133A	200047_s_at	62	0.76	0.098727	-	0.93	0.222704	0.86	2.37 [0.59 - 9.45]
GSE12945	Colorectal cancer		Disease Free Survival	Berlin	Staub	HG-U133A	201901_s_at	51	0.41	0.047045	0.473575	15.99	0.173492	1.17	3.24 [0.60 - 17.56]
GSE12945	Colorectal cancer		Overall Survival	Berlin	Staub	HG-U133A	201901_s_at	62	0.89	0.002624	0.05652	1.66	0.043777	0.97	2.64 [1.03 - 6.77]
GSE12945	Colorectal cancer		Disease Free Survival	Berlin	Staub	HG-U133A	201902_s_at	51	0.69	0.126295	-	1.3	0.615209	1.18	3.26 [0.03 - 326.23]
GSE12945	Colorectal cancer		Overall Survival	Berlin	Staub	HG-U133A	201902_s_at	62	0.89	0.001785	0.041259	1.72	0.712005	0.51	1.67 [0.11 - 25.35]
GSE12945	Colorectal cancer		Disease Free Survival	Berlin	Staub	HG-U133A	213494_s_at	51	0.84	0.001746	0.040519	2.32	0.032292	5.37	214.85 [1.57 - 29331.98]
GSE12945	Colorectal cancer		Overall Survival	Berlin	Staub	HG-U133A	213494_s_at	62	0.48	0.017202	0.240685	1.66	0.031523	2.43	11.37 [1.24 - 104.22]
GSE17536	Colorectal cancer		Disease Free Survival	MCC	Smith	HG-U133_Plus_2	200047_s_at	145	0.32	0.125463	-	0.61	0.537137	0.4	1.50 [0.42 - 5.38]
GSE17536	Colorectal cancer		Overall Survival	MCC	Smith	HG-U133_Plus_2	200047_s_at	177	0.11	0.068763	-	0.91	0.292159	0.49	1.63 [0.66 - 4.07]
GSE17536	Colorectal cancer		Disease Specific Survival	MCC	Smith	HG-U133_Plus_2	200047_s_at	177	0.58	0.245152	-	-0.33	0.782482	0.15	1.16 [0.41 - 3.27]
GSE17536	Colorectal cancer		Disease Free Survival	MCC	Smith	HG-U133_Plus_2	201901_s_at	145	0.39	0.013674	0.203747	1	0.227088	0.73	2.08 [0.63 - 6.86]
GSE17536	Colorectal cancer		Overall Survival	MCC	Smith	HG-U133_Plus_2	201901_s_at	177	0.1	0.0443	0.456195	1.13	0.185181	0.57	1.76 [0.76 - 4.07]
GSE17536	Colorectal cancer		Disease Specific Survival	MCC	Smith	HG-U133_Plus_2	201901_s_at	177	0.1	0.024057	0.304847	1.95	0.250361	0.57	1.76 [0.67 - 4.62]
GSE17536	Colorectal cancer		Disease Free Survival	MCC	Smith	HG-U133_Plus_2	201902_s_at	145	0.1	0.020254	0.270338	15.23	0.66961	0.31	1.36 [0.33 - 5.64]
GSE17536	Colorectal cancer		Overall Survival	MCC	Smith	HG-U133_Plus_2	201902_s_at	177	0.59	0.035068	0.392822	-0.54	0.950156	-0.03	0.97 [0.36 - 2.62]
GSE17536	Colorectal cancer		Disease Specific Survival	MCC	Smith	HG-U133_Plus_2	224711_at	177	0.27	0.022453	0.290592	0.85	0.038751	0.87	2.39 [1.05 - 5.45]
GSE17536	Colorectal cancer		Disease Specific Survival	MCC	Smith	HG-U133_Plus_2	224718_at	177	0.9	0.020141	0.269277	0.81	0.032338	0.86	2.36 [1.07 - 5.17]
GSE17536	Colorectal cancer		Disease Free Survival	MCC	Smith	HG-U133_Plus_2	224711_at	145	0.78	0.063712	-	0.65	0.170761	0.69	1.98 [0.74 - 5.29]
GSE17536	Colorectal cancer		Disease Free Survival	MCC	Smith	HG-U133_Plus_2	224718_at	145	0.36	0.040517	0.431198	0.8	0.143975	0.71	2.03 [0.78 - 5.27]
GSE17536	Colorectal cancer		Overall Survival	MCC	Smith	HG-U133_Plus_2	224711_at	177	0.82	0.096134	-	0.46	0.107284	0.57	1.77 [0.88 - 3.56]
GSE17536	Colorectal cancer		Overall Survival	MCC	Smith	HG-U133_Plus_2	224718_at	177	0.9	0.02387	0.303205	0.71	0.153312	0.49	1.63 [0.83 - 3.21]
GSE17536	Colorectal cancer		Overall Survival	MCC	Smith	HG-U133_Plus_2	213494_s_at	177	0.11	0.108079	-	0.73	0.582833	0.25	1.29 [0.53 - 3.14]
GSE17536	Colorectal cancer		Disease Specific Survival	MCC	Smith	HG-U133_Plus_2	201902_s_at	177	0.59	0.043369	0.450162	-0.61	0.88774	0.08	1.09 [0.35 - 3.41]
GSE17536	Colorectal cancer		Disease Specific Survival	MCC	Smith	HG-U133_Plus_2	213494_s_at	177	0.6	0.19636	-	0.35	0.714273	0.19	1.21 [0.43 - 3.41]
GSE17536	Colorectal cancer		Disease Free Survival	MCC	Smith	HG-U133_Plus_2	213494_s_at	145	0.26	0.082595	-	-0.59	0.85055	-0.12	0.89 [0.25 - 3.15]
GSE14333	Colorectal cancer		Disease Free Survival	Melbourne	Jorissen	HG-U133_Plus_2	213494_s_at	226	0.12	0.09485	-	1.14	0.298094	0.3	1.35 [0.77 - 2.39]
GSE14333	Colorectal cancer		Disease Free Survival	Melbourne	Jorissen	HG-U133_Plus_2	224711_at	226	0.31	0.007677	0.132068	0.99	0.022824	0.98	2.66 [1.15 - 6.17]
GSE14333	Colorectal cancer		Disease Free Survival	Melbourne	Jorissen	HG-U133_Plus_2	224718_at	226	0.29	0.020716	0.274672	0.87	0.075356	0.54	1.71 [0.95 - 3.10]
GSE14333	Colorectal cancer		Disease Free Survival	Melbourne	Jorissen	HG-U133_Plus_2	200047_s_at	226	0.81	0.069927	-	-0.83	0.477053	-0.4	0.67 [0.23 - 2.00]
GSE14333	Colorectal cancer		Disease Free Survival	Melbourne	Jorissen	HG-U133_Plus_2	201901_s_at	226	0.79	0.02253	0.291287	0.7	0.561874	0.31	1.36 [0.48 - 3.85]
GSE14333	Colorectal cancer		Disease Free Survival	Melbourne	Jorissen	HG-U133_Plus_2	201902_s_at	226	0.12	0.01774	0.246058	-0.79	0.135374	-0.18	0.83 [0.65 - 1.06]
GSE17537	Colorectal cancer		Overall Survival	VMC	Smith	HG-U133_Plus_2	200047_s_at	55	0.78	0.067654	-	0.84	0.145704	1.07	2.90 [0.69 - 12.22]
GSE17537	Colorectal cancer		Disease Free Survival	VMC	Smith	HG-U133_Plus_2	200047_s_at	55	0.78	0.002349	0.051658	1.36	0.100226	1.44	4.23 [0.76 - 23.65]
GSE17537	Colorectal cancer		Disease Specific Survival	VMC	Smith	HG-U133_Plus_2	200047_s_at	49	0.78	0.010954	0.172886	1.37	0.073738	1.86	6.42 [0.84 - 49.22]
GSE17537	Colorectal cancer		Overall Survival	VMC	Smith	HG-U133_Plus_2	201901_s_at	55	0.13	0.237152	-	1.15	0.755847	0.24	1.27 [0.28 - 5.78]
GSE17537	Colorectal cancer		Disease Free Survival	VMC	Smith	HG-U133_Plus_2	201901_s_at	55	0.73	0.13692	-	0.71	0.317244	0.82	2.27 [0.46 - 11.33]
GSE17537	Colorectal cancer		Disease Specific Survival	VMC	Smith	HG-U133_Plus_2	201901_s_at	49	0.37	0.175935	-	1.01	0.618993	0.5	1.64 [0.23 - 11.70]
GSE17537	Colorectal cancer		Overall Survival	VMC	Smith	HG-U133_Plus_2	201902_s_at	55	0.25	0.196068	-	0.79	0.544348	-0.52	0.59 [0.11 - 3.20]
GSE17537	Colorectal cancer		Disease Free Survival	VMC	Smith	HG-U133_Plus_2	213494_s_at	55	0.8	0.00071	0.019088	1.57	0.005706	1.61	5.02 [1.60 - 15.74]
GSE17537	Colorectal cancer		Disease Specific Survival	VMC	Smith	HG-U133_Plus_2	224711_at	49	0.14	0.01897	0.258102	-1.35	0.182571	-1.09	0.34 [0.07 - 1.67]
GSE17537	Colorectal cancer		Overall Survival	VMC	Smith	HG-U133_Plus_2	213494_s_at	55	0.85	0.076754	-	0.89	0.476671	0.37	1.45 [0.52 - 4.07]
GSE17537	Colorectal cancer		Disease Free Survival	VMC	Smith	HG-U133_Plus_2	224711_at	55	0.16	0.077978	-	-0.94	0.54724	-0.42	0.66 [0.17 - 2.57]
GSE17537	Colorectal cancer		Overall Survival	VMC	Smith	HG-U133_Plus_2	224718_at	55	0.25	0.036013	0.399687	1.44	0.297882	0.41	1.50 [0.70 - 3.23]
GSE17537	Colorectal cancer		Disease Specific Survival	VMC	Smith	HG-U133_Plus_2	224718_at	49	0.29	0.046129	0.467845	1.82	0.250534	0.58	1.79 [0.66 - 4.86]
GSE17537	Colorectal cancer		Disease Specific Survival	VMC	Smith	HG-U133_Plus_2	201902_s_at	49	0.1	0.068479	-	-1.15	0.209497	-1.32	0.27 [0.03 - 2.10]
GSE17537	Colorectal cancer		Disease Specific Survival	VMC	Smith	HG-U133_Plus_2	213494_s_at	49	0.86	0.064095	-	1.08	0.221875	0.83	2.28 [0.61 - 8.60]
GSE17537	Colorectal cancer		Overall Survival	VMC	Smith	HG-U133_Plus_2	224711_at	55	0.24	0.075544	-	-0.81	0.094375	-1.11	0.33 [0.09 - 1.21]
GSE17537	Colorectal cancer		Disease Free Survival	VMC	Smith	HG-U133_Plus_2	201902_s_at	55	0.65	0.23795	-	0.57	0.707542	-0.37	0.69 [0.10 - 4.76]
GSE17537	Colorectal cancer		Disease Free Survival	VMC	Smith	HG-U133_Plus_2	224718_at	55	0.89	0.002636	0.056731	1.49	0.023278	1.15	3.16 [1.17 - 8.53]
GSE22138	Eye cancer	Uveal melanoma	Distant Metastasis Free Survival	BRCIC	Laurent	HG-U133_Plus_2	213494_s_at	63	0.75	0.018651	0.255009	0.85	0.178895	0.59	1.80 [0.76 - 4.21]
GSE22138	Eye cancer	Uveal melanoma	Distant Metastasis Free Survival	BRCIC	Laurent	HG-U133_Plus_2	224718_at	63	0.84	7.7e-05	0.002781	1.45	0.031094	0.7	2.02 [1.07 - 3.81]
GSE22138	Eye cancer	Uveal melanoma	Distant Metastasis Free Survival	BRCIC	Laurent	HG-U133_Plus_2	224711_at	63	0.86	0.000104	0.003626	1.44	0.047794	0.94	2.56 [1.01 - 6.52]
GSE22138	Eye cancer	Uveal melanoma	Distant Metastasis Free Survival	BRCIC	Laurent	HG-U133_Plus_2	200047_s_at	63	0.87	0.047946	0.47915	-1.34	0.129332	-0.36	0.70 [0.44 - 1.11]
GSE22138	Eye cancer	Uveal melanoma	Distant Metastasis Free Survival	BRCIC	Laurent	HG-U133_Plus_2	201901_s_at	63	0.51	0.004999	0.094629	0.97	0.407607	0.3	1.35 [0.66 - 2.75]
GSE22138	Eye cancer	Uveal melanoma	Distant Metastasis Free Survival	BRCIC	Laurent	HG-U133_Plus_2	201902_s_at	63	0.63	0.005012	0.094815	-1.13	0.483441	-1.12	0.33 [0.01 - 7.46]
GSE2837	Head and neck cancer	Squamous cell carcinoma	Relapse Free Survival	VUMC, VAMC, UTMDACC (1992-2005)	Chung	U133_X3P	200047_s_at	28	0.39	0.06298	-	1.11	0.796103	0.05	1.05 [0.74 - 1.49]
GSE2837	Head and neck cancer	Squamous cell carcinoma	Relapse Free Survival	VUMC, VAMC, UTMDACC (1992-2005)	Chung	U133_X3P	201902_3p_s_at	28	0.75	0.027921	0.337539	-2.02	0.115431	-9.9	0.00 [0.00 - 11.31]
GSE2837	Head and neck cancer	Squamous cell carcinoma	Relapse Free Survival	VUMC, VAMC, UTMDACC (1992-2005)	Chung	U133_X3P	g6042207_3p_a_at	28	0.43	0.049651	0.489523	1.16	0.706388	0.06	1.07 [0.76 - 1.49]
GSE2837	Head and neck cancer	Squamous cell carcinoma	Relapse Free Survival	VUMC, VAMC, UTMDACC (1992-2005)	Chung	U133_X3P	Hs.296322.0.S2_3p_at	28	0.14	0.133138	-	-0.96	0.868648	-0.1	0.91 [0.28 - 2.91]
GSE2837	Head and neck cancer	Squamous cell carcinoma	Relapse Free Survival	VUMC, VAMC, UTMDACC (1992-2005)	Chung	U133_X3P	Hs.296322.0.S3_3p_at	28	0.64	0.083587	-	0.92	0.473007	0.16	1.17 [0.76 - 1.82]
GSE2837	Head and neck cancer	Squamous cell carcinoma	Relapse Free Survival	VUMC, VAMC, UTMDACC (1992-2005)	Chung	U133_X3P	Hs.97496.0.S1_3p_a_at	28	0.68	0.005443	0.101161	1.56	0.130827	0.58	1.78 [0.84 - 3.75]
GSE2837	Head and neck cancer	Squamous cell carcinoma	Relapse Free Survival	VUMC, VAMC, UTMDACC (1992-2005)	Chung	U133_X3P	Hs.97496.0.S3_3p_at	28	0.64	0.116773	-	-1.01	0.257896	-7.11	0.00 [0.00 - 182.42]
GSE2837	Head and neck cancer	Squamous cell carcinoma	Relapse Free Survival	VUMC, VAMC, UTMDACC (1992-2005)	Chung	U133_X3P	Hs.97496.0.S3_3p_s_at	28	0.54	0.04343	0.45056	-1.18	0.35115	-1.18	0.31 [0.03 - 3.68]
GSE2837	Head and neck cancer	Squamous cell carcinoma	Relapse Free Survival	VUMC, VAMC, UTMDACC (1992-2005)	Chung	U133_X3P	Hs.97496.1.S1_3p_a_at	28	0.11	0.12219	-	-1.16	0.481479	0.34	1.40 [0.55 - 3.61]
jacob-00182-CANDF	Lung cancer	Adenocarcinoma	Overall Survival	CAN/DF	Shedden	HG-U133A	200047_s_at	82	0.15	0.052899	-	-0.77	0.855788	-0.11	0.90 [0.28 - 2.84]
jacob-00182-CANDF	Lung cancer	Adenocarcinoma	Overall Survival	CAN/DF	Shedden	HG-U133A	201901_s_at	82	0.89	0.085917	-	-1.57	0.222267	-0.55	0.58 [0.24 - 1.39]
jacob-00182-CANDF	Lung cancer	Adenocarcinoma	Overall Survival	CAN/DF	Shedden	HG-U133A	201902_s_at	82	0.8	0.098416	-	0.61	0.645052	0.35	1.42 [0.32 - 6.27]
jacob-00182-CANDF	Lung cancer	Adenocarcinoma	Overall Survival	CAN/DF	Shedden	HG-U133A	213494_s_at	82	0.76	0.084087	-	0.63	0.685496	0.22	1.25 [0.43 - 3.66]
HARVARD-LC	Lung cancer	Adenocarcinoma	Overall Survival	Harvard	Beer	HG-U95A	891_at	84	0.19	0.004573	0.088207	1.38	0.082753	0.67	1.95 [0.92 - 4.14]
jacob-00182-HLM	Lung cancer	Adenocarcinoma	Overall Survival	HLM	Shedden	HG-U133A	200047_s_at	79	0.33	0.110512	-	0.45	0.856147	0.11	1.11 [0.35 - 3.57]
jacob-00182-HLM	Lung cancer	Adenocarcinoma	Overall Survival	HLM	Shedden	HG-U133A	201901_s_at	79	0.84	0.03717	0.407974	-0.87	0.523482	-0.36	0.70 [0.23 - 2.09]
jacob-00182-HLM	Lung cancer	Adenocarcinoma	Overall Survival	HLM	Shedden	HG-U133A	201902_s_at	79	0.68	0.046734	0.471637	0.53	0.389912	0.37	1.44 [0.62 - 3.34]
jacob-00182-HLM	Lung cancer	Adenocarcinoma	Overall Survival	HLM	Shedden	HG-U133A	213494_s_at	79	0.61	0.096736	-	-0.46	0.764635	-0.12	0.88 [0.39 - 1.99]
MICHIGAN-LC	Lung cancer	Adenocarcinoma	Overall Survival	Michigan (1994-2000)	Beer	HuGeneFL	M77698_at	86	0.86	0.069239	-	0.9	0.263038	0.55	1.74 [0.66 - 4.57]
jacob-00182-MSK	Lung cancer	Adenocarcinoma	Overall Survival	MSK	Shedden	HG-U133A	200047_s_at	104	0.81	0.185234	-	-0.69	0.712181	-0.25	0.78 [0.20 - 2.98]
jacob-00182-MSK	Lung cancer	Adenocarcinoma	Overall Survival	MSK	Shedden	HG-U133A	201901_s_at	104	0.84	0.151301	-	-0.84	0.515103	-0.43	0.65 [0.18 - 2.37]
jacob-00182-MSK	Lung cancer	Adenocarcinoma	Overall Survival	MSK	Shedden	HG-U133A	201902_s_at	104	0.51	0.123269	-	0.5	0.660753	-0.29	0.75 [0.21 - 2.69]
jacob-00182-MSK	Lung cancer	Adenocarcinoma	Overall Survival	MSK	Shedden	HG-U133A	213494_s_at	104	0.42	0.110618	-	-0.51	0.41964	-0.39	0.67 [0.26 - 1.76]
GSE13213	Lung cancer	Adenocarcinoma	Overall Survival	Nagoya (1995-1999, 2002-2004)	Tomida	G4112F	A_24_P219140	117	0.32	0.033191	0.378886	0.72	0.115156	0.51	1.66 [0.88 - 3.11]
GSE13213	Lung cancer	Adenocarcinoma	Overall Survival	Nagoya (1995-1999, 2002-2004)	Tomida	G4112F	A_24_P916288	117	0.33	0.109998	-	0.53	0.967972	-0.01	0.99 [0.54 - 1.81]
GSE31210	Lung cancer	Adenocarcinoma	Overall Survival	NCCRI	Okayama	HG-U133_Plus_2	200047_s_at	204	0.83	0.00033	0.00992	1.26	0.00583	3.38	29.41 [2.66 - 325.45]
GSE31210	Lung cancer	Adenocarcinoma	Relapse Free Survival	NCCRI	Okayama	HG-U133_Plus_2	200047_s_at	204	0.51	0.000897	0.023262	0.94	0.000802	3.02	20.43 [3.50 - 119.22]
GSE31210	Lung cancer	Adenocarcinoma	Overall Survival	NCCRI	Okayama	HG-U133_Plus_2	201901_s_at	204	0.78	0.004928	0.093563	1.01	0.097662	1.5	4.47 [0.76 - 26.31]
GSE31210	Lung cancer	Adenocarcinoma	Relapse Free Survival	NCCRI	Okayama	HG-U133_Plus_2	201901_s_at	204	0.72	0.012346	0.188972	0.68	0.131952	1.03	2.80 [0.73 - 10.71]
GSE31210	Lung cancer	Adenocarcinoma	Overall Survival	NCCRI	Okayama	HG-U133_Plus_2	213494_s_at	204	0.86	0.021263	0.279742	0.92	0.058869	1.58	4.84 [0.94 - 24.82]
GSE31210	Lung cancer	Adenocarcinoma	Relapse Free Survival	NCCRI	Okayama	HG-U133_Plus_2	224718_at	204	0.11	0.057203	-	-0.69	0.083307	-0.82	0.44 [0.18 - 1.11]
GSE31210	Lung cancer	Adenocarcinoma	Overall Survival	NCCRI	Okayama	HG-U133_Plus_2	224718_at	204	0.14	0.047485	0.476305	-0.83	0.468386	-0.46	0.63 [0.19 - 2.17]
GSE31210	Lung cancer	Adenocarcinoma	Relapse Free Survival	NCCRI	Okayama	HG-U133_Plus_2	213494_s_at	204	0.63	0.007874	0.134665	0.71	0.030028	1.33	3.79 [1.14 - 12.60]
GSE31210	Lung cancer	Adenocarcinoma	Overall Survival	NCCRI	Okayama	HG-U133_Plus_2	201902_s_at	204	0.68	0.002496	0.054281	1.06	0.026699	1.08	2.94 [1.13 - 7.64]
GSE31210	Lung cancer	Adenocarcinoma	Relapse Free Survival	NCCRI	Okayama	HG-U133_Plus_2	201902_s_at	204	0.62	0.000728	0.019493	0.9	0.000432	1.34	3.84 [1.81 - 8.11]
GSE31210	Lung cancer	Adenocarcinoma	Overall Survival	NCCRI	Okayama	HG-U133_Plus_2	224711_at	204	0.86	0.161029	-	-0.99	0.441522	-0.62	0.54 [0.11 - 2.60]
GSE31210	Lung cancer	Adenocarcinoma	Relapse Free Survival	NCCRI	Okayama	HG-U133_Plus_2	224711_at	204	0.11	0.020388	0.271607	-0.79	0.061544	-1.12	0.33 [0.10 - 1.06]
jacob-00182-UM	Lung cancer	Adenocarcinoma	Overall Survival	UM	Shedden	HG-U133A	200047_s_at	178	0.69	0.051636	-	0.39	0.084907	0.9	2.46 [0.88 - 6.86]
jacob-00182-UM	Lung cancer	Adenocarcinoma	Overall Survival	UM	Shedden	HG-U133A	201901_s_at	178	0.83	0.211731	-	0.3	0.8207	0.11	1.11 [0.44 - 2.81]
jacob-00182-UM	Lung cancer	Adenocarcinoma	Overall Survival	UM	Shedden	HG-U133A	201902_s_at	178	0.31	0.086885	-	0.38	0.238826	0.48	1.62 [0.73 - 3.59]
jacob-00182-UM	Lung cancer	Adenocarcinoma	Overall Survival	UM	Shedden	HG-U133A	213494_s_at	178	0.89	0.026426	0.325143	0.61	0.990507	0	1.00 [0.56 - 1.80]
GSE11117	Lung cancer	NSCLC	Overall Survival	Basel (2002-2005)	Baty	Novachip human 34.5k	H200010807	41	0.68	0.144483	-	0.62	0.375072	0.45	1.56 [0.58 - 4.18]
GSE3141	Lung cancer	NSCLC	Overall Survival	Duke	Bild	HG-U133_Plus_2	200047_s_at	111	0.83	0.064231	-	-0.93	0.785972	0.09	1.10 [0.56 - 2.16]
GSE3141	Lung cancer	NSCLC	Overall Survival	Duke	Bild	HG-U133_Plus_2	201901_s_at	111	0.21	0.067574	-	-0.53	0.394241	-0.35	0.71 [0.32 - 1.57]
GSE3141	Lung cancer	NSCLC	Overall Survival	Duke	Bild	HG-U133_Plus_2	213494_s_at	111	0.73	0.064498	-	0.52	0.740927	0.09	1.09 [0.64 - 1.86]
GSE3141	Lung cancer	NSCLC	Overall Survival	Duke	Bild	HG-U133_Plus_2	224711_at	111	0.14	0.009041	0.14962	-0.84	0.009185	-1.1	0.33 [0.15 - 0.76]
GSE3141	Lung cancer	NSCLC	Overall Survival	Duke	Bild	HG-U133_Plus_2	201902_s_at	111	0.52	0.13637	-	-0.4	0.274629	-0.2	0.82 [0.58 - 1.17]
GSE3141	Lung cancer	NSCLC	Overall Survival	Duke	Bild	HG-U133_Plus_2	224718_at	111	0.11	0.026871	0.328869	-0.8	0.177566	-0.49	0.61 [0.30 - 1.25]
GSE14814	Lung cancer	NSCLC	Overall Survival	JRB.10	Zhu	HG-U133A	200047_s_at	90	0.11	0.320285	-	-0.48	0.739117	-0.08	0.92 [0.57 - 1.49]
GSE14814	Lung cancer	NSCLC	Disease Specific Survival	JRB.10	Zhu	HG-U133A	200047_s_at	90	0.11	0.115961	-	-0.76	0.227886	-0.31	0.73 [0.44 - 1.21]
GSE14814	Lung cancer	NSCLC	Overall Survival	JRB.10	Zhu	HG-U133A	201901_s_at	90	0.11	0.128244	-	-0.67	0.423953	-0.27	0.77 [0.40 - 1.47]
GSE14814	Lung cancer	NSCLC	Disease Specific Survival	JRB.10	Zhu	HG-U133A	201901_s_at	90	0.11	0.1145	-	-0.76	0.294551	-0.38	0.68 [0.33 - 1.40]
GSE14814	Lung cancer	NSCLC	Overall Survival	JRB.10	Zhu	HG-U133A	201902_s_at	90	0.56	0.327829	-	0.32	0.94259	0.05	1.05 [0.25 - 4.48]
GSE14814	Lung cancer	NSCLC	Disease Specific Survival	JRB.10	Zhu	HG-U133A	201902_s_at	90	0.81	0.174769	-	0.56	0.701819	0.32	1.37 [0.27 - 6.99]
GSE14814	Lung cancer	NSCLC	Overall Survival	JRB.10	Zhu	HG-U133A	213494_s_at	90	0.21	0.115897	-	-0.56	0.650481	-0.29	0.75 [0.22 - 2.59]
GSE14814	Lung cancer	NSCLC	Disease Specific Survival	JRB.10	Zhu	HG-U133A	213494_s_at	90	0.21	0.08822	-	-0.67	0.659502	-0.32	0.72 [0.17 - 3.05]
GSE4716-GPL3694	Lung cancer	NSCLC	Overall Survival	Nagoya (1995-1996)	Tomida	GF200	198	50	0.22	0.062238	-	1.71	0.29561	0.46	1.58 [0.67 - 3.73]
GSE8894	Lung cancer	NSCLC	Relapse Free Survival	Seoul (1995-2005)	Lee	HG-U133_Plus_2	200047_s_at	138	0.22	0.016728	0.235901	0.81	0.293412	0.32	1.37 [0.76 - 2.47]
GSE8894	Lung cancer	NSCLC	Relapse Free Survival	Seoul (1995-2005)	Lee	HG-U133_Plus_2	201901_s_at	138	0.12	0.023803	0.30262	1.25	0.205762	0.25	1.28 [0.87 - 1.88]
GSE8894	Lung cancer	NSCLC	Relapse Free Survival	Seoul (1995-2005)	Lee	HG-U133_Plus_2	201902_s_at	138	0.67	0.028205	0.339854	0.53	0.295729	0.44	1.56 [0.68 - 3.59]
GSE8894	Lung cancer	NSCLC	Relapse Free Survival	Seoul (1995-2005)	Lee	HG-U133_Plus_2	213494_s_at	138	0.26	0.017729	0.245947	0.74	0.078891	0.31	1.36 [0.97 - 1.91]
GSE8894	Lung cancer	NSCLC	Relapse Free Survival	Seoul (1995-2005)	Lee	HG-U133_Plus_2	224711_at	138	0.81	0.205055	-	-0.42	0.95939	-0.01	0.99 [0.69 - 1.41]
GSE8894	Lung cancer	NSCLC	Relapse Free Survival	Seoul (1995-2005)	Lee	HG-U133_Plus_2	224718_at	138	0.24	0.045648	0.46481	-0.53	0.200893	-0.24	0.78 [0.54 - 1.14]
GSE4573	Lung cancer	Squamous cell carcinoma	Overall Survival	Michigan (1991-2002)	Raponi	HG-U133A	200047_s_at	129	0.67	0.019858	0.266599	0.57	0.595736	0.25	1.28 [0.51 - 3.20]
GSE4573	Lung cancer	Squamous cell carcinoma	Overall Survival	Michigan (1991-2002)	Raponi	HG-U133A	201901_s_at	129	0.16	0.044378	0.456698	-0.63	0.581148	-0.27	0.76 [0.29 - 2.02]
GSE4573	Lung cancer	Squamous cell carcinoma	Overall Survival	Michigan (1991-2002)	Raponi	HG-U133A	201902_s_at	129	0.54	0.006152	0.111309	-0.69	0.022996	-0.39	0.68 [0.49 - 0.95]
GSE4573	Lung cancer	Squamous cell carcinoma	Overall Survival	Michigan (1991-2002)	Raponi	HG-U133A	213494_s_at	129	0.65	0.071754	-	-0.49	0.52731	-0.37	0.69 [0.22 - 2.17]
GSE17710	Lung cancer	Squamous cell carcinoma	Overall Survival	UNC	Wilkerson	Agilent-UNC-custom-4X44K	16133	56	0.84	0.038246	0.415562	0.85	0.53566	0.23	1.26 [0.60 - 2.66]
GSE17710	Lung cancer	Squamous cell carcinoma	Overall Survival	UNC	Wilkerson	Agilent-UNC-custom-4X44K	7178	56	0.89	0.000702	0.01891	1.53	0.494182	0.25	1.28 [0.63 - 2.58]
GSE17710	Lung cancer	Squamous cell carcinoma	Relapse Free Survival	UNC	Wilkerson	Agilent-UNC-custom-4X44K	7178	56	0.89	0.015679	0.225121	1.08	0.753609	0.1	1.11 [0.58 - 2.13]
GSE17710	Lung cancer	Squamous cell carcinoma	Relapse Free Survival	UNC	Wilkerson	Agilent-UNC-custom-4X44K	16133	56	0.89	0.174568	-	0.66	0.845201	0.07	1.07 [0.54 - 2.14]
GSE9891	Ovarian cancer		Overall Survival	AOCS, RBH, WH, NKI-AVL (1992-2006)	Tothill	HG-U133_Plus_2	224711_at	278	0.15	0.016614	0.234736	0.72	0.114646	0.29	1.34 [0.93 - 1.93]
GSE9891	Ovarian cancer		Overall Survival	AOCS, RBH, WH, NKI-AVL (1992-2006)	Tothill	HG-U133_Plus_2	213494_s_at	278	0.1	0.090594	-	0.61	0.559121	0.14	1.14 [0.73 - 1.80]
GSE9891	Ovarian cancer		Overall Survival	AOCS, RBH, WH, NKI-AVL (1992-2006)	Tothill	HG-U133_Plus_2	224718_at	278	0.83	0.037004	0.406792	0.47	0.04916	0.33	1.39 [1.00 - 1.92]
GSE9891	Ovarian cancer		Overall Survival	AOCS, RBH, WH, NKI-AVL (1992-2006)	Tothill	HG-U133_Plus_2	201902_s_at	278	0.16	0.223765	-	-0.29	0.561348	-0.16	0.86 [0.51 - 1.45]
GSE9891	Ovarian cancer		Overall Survival	AOCS, RBH, WH, NKI-AVL (1992-2006)	Tothill	HG-U133_Plus_2	200047_s_at	278	0.18	0.031631	0.367003	0.62	0.239004	0.3	1.35 [0.82 - 2.24]
GSE9891	Ovarian cancer		Overall Survival	AOCS, RBH, WH, NKI-AVL (1992-2006)	Tothill	HG-U133_Plus_2	201901_s_at	278	0.12	0.183539	-	0.42	0.817624	0.05	1.05 [0.68 - 1.64]
DUKE-OC	Ovarian cancer		Overall Survival	Duke	Bild	HG-U133A	200047_s_at	133	0.51	0.000136	0.004601	-0.91	0.003598	-0.72	0.48 [0.30 - 0.79]
DUKE-OC	Ovarian cancer		Overall Survival	Duke	Bild	HG-U133A	201901_s_at	133	0.77	0.039032	0.421026	-0.67	0.032343	-0.36	0.70 [0.50 - 0.97]
DUKE-OC	Ovarian cancer		Overall Survival	Duke	Bild	HG-U133A	201902_s_at	133	0.73	0.004428	0.085988	0.69	0.051315	0.52	1.69 [1.00 - 2.85]
DUKE-OC	Ovarian cancer		Overall Survival	Duke	Bild	HG-U133A	213494_s_at	133	0.71	0.012211	0.187439	0.6	0.186881	0.14	1.15 [0.94 - 1.40]
GSE8841	Ovarian cancer		Overall Survival	Milan (1992-2003)	Marchini	G4100A	11555	81	0.89	1e-06	7.6e-05	2.41	0.000403	0.73	2.08 [1.39 - 3.12]
GSE26712	Ovarian cancer		Overall Survival	MSKCC (1990-2003)	Bonome	HG-U133_Plus_2	200047_s_at	185	0.76	0.025532	0.317585	0.42	0.705115	0.04	1.04 [0.86 - 1.26]
GSE26712	Ovarian cancer		Disease Free Survival	MSKCC (1990-2003)	Bonome	HG-U133_Plus_2	200047_s_at	185	0.9	0.113553	-	0.41	0.741853	0.03	1.03 [0.87 - 1.22]
GSE26712	Ovarian cancer		Overall Survival	MSKCC (1990-2003)	Bonome	HG-U133_Plus_2	201901_s_at	185	0.52	0.125472	-	0.27	0.995147	0	1.00 [0.79 - 1.27]
GSE26712	Ovarian cancer		Disease Free Survival	MSKCC (1990-2003)	Bonome	HG-U133_Plus_2	201901_s_at	185	0.3	0.039577	0.424783	0.37	0.470781	0.08	1.09 [0.87 - 1.36]
GSE26712	Ovarian cancer		Overall Survival	MSKCC (1990-2003)	Bonome	HG-U133_Plus_2	201902_s_at	185	0.1	0.05677	-	0.62	0.516834	0.25	1.28 [0.60 - 2.73]
GSE26712	Ovarian cancer		Disease Free Survival	MSKCC (1990-2003)	Bonome	HG-U133_Plus_2	213494_s_at	185	0.72	0.11001	-	-0.3	0.963164	-0.01	0.99 [0.61 - 1.60]
GSE26712	Ovarian cancer		Overall Survival	MSKCC (1990-2003)	Bonome	HG-U133_Plus_2	213494_s_at	185	0.67	0.198367	-	-0.25	0.778602	0.08	1.08 [0.64 - 1.83]
GSE26712	Ovarian cancer		Disease Free Survival	MSKCC (1990-2003)	Bonome	HG-U133_Plus_2	201902_s_at	185	0.1	0.208739	-	0.33	0.76734	0.1	1.11 [0.56 - 2.20]
GSE17260	Ovarian cancer		Progression Free Survival	Niigata (1997-2008)	Yoshihara	G4112A	A_24_P219140	110	0.65	0.078688	-	0.42	0.325674	0.22	1.24 [0.81 - 1.91]
GSE17260	Ovarian cancer		Overall Survival	Niigata (1997-2008)	Yoshihara	G4112A	A_24_P219140	110	0.61	0.007891	0.134882	0.79	0.096707	0.49	1.63 [0.92 - 2.91]
GSE14764	Ovarian cancer		Overall Survival	TOC	Denkert	HG-U133A	200047_s_at	80	0.23	0.101806	-	1.16	0.601819	0.25	1.28 [0.50 - 3.29]
GSE14764	Ovarian cancer		Overall Survival	TOC	Denkert	HG-U133A	201901_s_at	80	0.16	0.073042	-	1.65	0.348751	0.49	1.63 [0.59 - 4.51]
GSE14764	Ovarian cancer		Overall Survival	TOC	Denkert	HG-U133A	201902_s_at	80	0.64	0.2119	-	-0.64	0.776864	-0.06	0.94 [0.62 - 1.43]
GSE14764	Ovarian cancer		Overall Survival	TOC	Denkert	HG-U133A	213494_s_at	80	0.78	0.005543	0.102617	1.19	0.274217	0.47	1.61 [0.69 - 3.76]
GSE16560	Prostate cancer		Overall Survival	Sweden (1977-1999)	Sboner	6K DASL	DAP2_0587	281	0.7	0.035593	0.396646	0.32	0.300633	0.12	1.13 [0.90 - 1.41]
E-DKFZ-1	Renal cell carcinoma		Overall Survival	RZPD	Sueltmann	A-RZPD-20	rzpd.de:huber1:Reporter:IMAGE:725706	59	0.14	0.000575	0.015961	-1.6	0.051361	-2.15	0.12 [0.01 - 1.01]
GSE19234	Skin cancer	Melanoma	Overall Survival	NYU	Bogunovic	HG-U133_Plus_2	200047_s_at	38	0.55	0.091951	-	-0.85	0.965604	0.05	1.05 [0.13 - 8.37]
GSE19234	Skin cancer	Melanoma	Overall Survival	NYU	Bogunovic	HG-U133_Plus_2	201901_s_at	38	0.16	0.020742	0.274909	-1.18	0.352747	-0.51	0.60 [0.20 - 1.77]
GSE19234	Skin cancer	Melanoma	Overall Survival	NYU	Bogunovic	HG-U133_Plus_2	224718_at	38	0.61	0.294341	-	-0.54	0.860225	0.1	1.10 [0.38 - 3.19]
GSE19234	Skin cancer	Melanoma	Overall Survival	NYU	Bogunovic	HG-U133_Plus_2	224711_at	38	0.74	0.159635	-	-1.01	0.923387	-0.07	0.94 [0.25 - 3.56]
GSE19234	Skin cancer	Melanoma	Overall Survival	NYU	Bogunovic	HG-U133_Plus_2	213494_s_at	38	0.21	0.154381	-	0.89	0.761126	0.12	1.13 [0.52 - 2.43]
GSE19234	Skin cancer	Melanoma	Overall Survival	NYU	Bogunovic	HG-U133_Plus_2	201902_s_at	38	0.37	0.002048	0.046177	1.85	0.061524	1.15	3.15 [0.95 - 10.46]
GSE30929	Soft tissue cancer	Liposarcoma	Distant Recurrence Free Survival	MSKCC (1993-2008)	Gobble	HG-U133A	200047_s_at	140	0.89	0.000591	0.016348	1.17	0.089119	0.74	2.10 [0.89 - 4.93]
GSE30929	Soft tissue cancer	Liposarcoma	Distant Recurrence Free Survival	MSKCC (1993-2008)	Gobble	HG-U133A	201901_s_at	140	0.89	0.025008	0.313095	0.85	0.403067	0.4	1.49 [0.59 - 3.77]
GSE30929	Soft tissue cancer	Liposarcoma	Distant Recurrence Free Survival	MSKCC (1993-2008)	Gobble	HG-U133A	201902_s_at	140	0.66	0.002681	0.057509	-1.06	0.016315	-2.16	0.11 [0.02 - 0.67]
GSE30929	Soft tissue cancer	Liposarcoma	Distant Recurrence Free Survival	MSKCC (1993-2008)	Gobble	HG-U133A	213494_s_at	140	0.82	0.029592	0.351021	0.68	0.614696	0.22	1.24 [0.53 - 2.88]
