# Supplementary material for: Cross-Talks between RKIP and YY1 through a Multilevel Bioinformatics Pan-Cancer Analysis
Source: Preprints.org preprint supplement (doi:10.20944/preprints202309.0467.v1), 2023-09-07
Supplement: Supplementary file 13 [file Table S6.xlsx]

## Sheet: Table S6
cancertype	symbol	pathway	fdr	class	diff	entrez
ACC	PEBP1	Apoptosis	0.973787	None	-0.015661272	5037
ACC	PEBP1	CellCycle	0.877165	None	-0.295219727	5037
ACC	PEBP1	DNADamage	0.877165	None	-0.497700964	5037
ACC	PEBP1	EMT	0.877165	None	-0.154978203	5037
ACC	PEBP1	Hormone AR	0.877165	None	-0.398980581	5037
ACC	PEBP1	Hormone ER	0.877165	None	-0.072548025	5037
ACC	PEBP1	PI3KAKT	0.877165	None	0.563603189	5037
ACC	PEBP1	RASMAPK	0.877165	None	-0.26191821	5037
ACC	PEBP1	RTK	0.877165	None	-0.554413076	5037
ACC	PEBP1	TSCmTOR	0.877165	None	-0.108504238	5037
ACC	YY1	Apoptosis	0.252569	None	0.924890577	7528
ACC	YY1	CellCycle	0.852336	None	0.128376333	7528
ACC	YY1	DNADamage	0.515564	None	0.543415436	7528
ACC	YY1	EMT	0.372073	None	0.710938668	7528
ACC	YY1	Hormone AR	0.624733	None	-0.316619853	7528
ACC	YY1	Hormone ER	0.252569	None	-0.553326903	7528
ACC	YY1	PI3KAKT	0.624733	None	0.46369036	7528
ACC	YY1	RASMAPK	0.348615	None	-0.604628954	7528
ACC	YY1	RTK	0.515564	None	-0.437471723	7528
ACC	YY1	TSCmTOR	0.852336	None	0.06505651	7528
BLCA	PEBP1	Apoptosis	3.03176e-06	Inhibition	-0.801683869	5037
BLCA	PEBP1	CellCycle	0.629708	None	-0.097627724	5037
BLCA	PEBP1	DNADamage	3.42446e-07	Activation	0.788190321	5037
BLCA	PEBP1	EMT	1.2469e-07	Inhibition	-1.826442148	5037
BLCA	PEBP1	Hormone AR	3.95602e-20	Activation	1.634065931	5037
BLCA	PEBP1	Hormone ER	0.629708	None	-0.040365397	5037
BLCA	PEBP1	PI3KAKT	0.445763	None	-0.269621778	5037
BLCA	PEBP1	RASMAPK	0.693556	None	-0.075892711	5037
BLCA	PEBP1	RTK	0.00874442	Activation	0.644756824	5037
BLCA	PEBP1	TSCmTOR	0.629708	None	0.105484177	5037
BLCA	YY1	Apoptosis	0.186734	None	0.267364435	7528
BLCA	YY1	CellCycle	0.000712178	Activation	0.660546668	7528
BLCA	YY1	DNADamage	0.0268599	Activation	0.373796819	7528
BLCA	YY1	EMT	0.0266732	Inhibition	-0.85994649	7528
BLCA	YY1	Hormone AR	0.418884	None	0.163491369	7528
BLCA	YY1	Hormone ER	0.0266732	Inhibition	-0.179724574	7528
BLCA	YY1	PI3KAKT	0.30491	None	-0.303896336	7528
BLCA	YY1	RASMAPK	0.0101213	Inhibition	-0.591927489	7528
BLCA	YY1	RTK	0.800466	None	-0.057602498	7528
BLCA	YY1	TSCmTOR	0.418884	None	-0.1441585	7528
BRCA	PEBP1	Apoptosis	1.0587e-05	Inhibition	-0.501194923	5037
BRCA	PEBP1	CellCycle	0.738917	None	-0.056901794	5037
BRCA	PEBP1	DNADamage	0.300695	None	0.154890272	5037
BRCA	PEBP1	EMT	9.6203e-05	Inhibition	-0.801204099	5037
BRCA	PEBP1	Hormone AR	0.000277275	Activation	0.818344017	5037
BRCA	PEBP1	Hormone ER	9.6203e-05	Activation	1.165771935	5037
BRCA	PEBP1	PI3KAKT	0.0490401	Inhibition	-0.346919918	5037
BRCA	PEBP1	RASMAPK	0.00430099	Inhibition	-0.422056412	5037
BRCA	PEBP1	RTK	1.24586e-08	Inhibition	-0.732119026	5037
BRCA	PEBP1	TSCmTOR	0.983046	None	-0.002392718	5037
BRCA	YY1	Apoptosis	8.35097e-06	Activation	0.505750378	7528
BRCA	YY1	CellCycle	1.31883e-07	Activation	0.739176774	7528
BRCA	YY1	DNADamage	0.282945	None	0.227123437	7528
BRCA	YY1	EMT	0.340565	None	-0.248130011	7528
BRCA	YY1	Hormone AR	0.810139	None	0.106704056	7528
BRCA	YY1	Hormone ER	0.298758	None	-0.407185001	7528
BRCA	YY1	PI3KAKT	0.810139	None	0.048650371	7528
BRCA	YY1	RASMAPK	0.810139	None	-0.038818641	7528
BRCA	YY1	RTK	0.810139	None	-0.029273854	7528
BRCA	YY1	TSCmTOR	0.298758	None	-0.164090049	7528
CESC	PEBP1	Apoptosis	0.793669	None	-0.124791808	5037
CESC	PEBP1	CellCycle	0.960514	None	0.029999069	5037
CESC	PEBP1	DNADamage	0.189279	None	0.523784131	5037
CESC	PEBP1	EMT	0.63637	None	0.387607233	5037
CESC	PEBP1	Hormone AR	0.63637	None	0.266941992	5037
CESC	PEBP1	Hormone ER	0.384692	None	0.296729336	5037
CESC	PEBP1	PI3KAKT	0.793669	None	0.1874722	5037
CESC	PEBP1	RASMAPK	0.989699	None	0.003690275	5037
CESC	PEBP1	RTK	0.189279	None	-0.682513311	5037
CESC	PEBP1	TSCmTOR	0.799028	None	0.097758606	5037
CESC	YY1	Apoptosis	0.157642	None	-0.367475399	7528
CESC	YY1	CellCycle	0.725706	None	-0.06135411	7528
CESC	YY1	DNADamage	0.106168	None	-0.612593878	7528
CESC	YY1	EMT	0.725706	None	-0.141552739	7528
CESC	YY1	Hormone AR	0.0267411	Inhibition	-0.764327085	7528
CESC	YY1	Hormone ER	0.157642	None	-0.33304655	7528
CESC	YY1	PI3KAKT	0.157642	None	0.610889666	7528
CESC	YY1	RASMAPK	0.429432	None	0.269511435	7528
CESC	YY1	RTK	0.157642	None	0.484376732	7528
CESC	YY1	TSCmTOR	0.208506	None	0.306873715	7528
CHOL	PEBP1	Apoptosis	0.990987	None	-0.004147132	5037
CHOL	PEBP1	CellCycle	0.815683	None	0.313401109	5037
CHOL	PEBP1	DNADamage	0.990987	None	0.014919297	5037
CHOL	PEBP1	EMT	0.990987	None	-0.11128299	5037
CHOL	PEBP1	Hormone AR	0.726089	None	0.595693494	5037
CHOL	PEBP1	Hormone ER	0.726089	None	0.432712024	5037
CHOL	PEBP1	PI3KAKT	0.990987	None	-0.21194757	5037
CHOL	PEBP1	RASMAPK	0.990987	None	-0.016939591	5037
CHOL	PEBP1	RTK	0.815683	None	0.364966894	5037
CHOL	PEBP1	TSCmTOR	0.990987	None	0.017325047	5037
CHOL	YY1	Apoptosis	0.953409	None	0.099339831	7528
CHOL	YY1	CellCycle	0.953409	None	-0.057778528	7528
CHOL	YY1	DNADamage	0.953409	None	-0.535563869	7528
CHOL	YY1	EMT	0.953409	None	-0.592169619	7528
CHOL	YY1	Hormone AR	0.988209	None	-0.005983232	7528
CHOL	YY1	Hormone ER	0.953409	None	-0.159119828	7528
CHOL	YY1	PI3KAKT	0.953409	None	-0.121247598	7528
CHOL	YY1	RASMAPK	0.953409	None	0.426729765	7528
CHOL	YY1	RTK	0.953409	None	0.31321196	7528
CHOL	YY1	TSCmTOR	0.953409	None	-0.261752523	7528
COAD	PEBP1	Apoptosis	0.706177	None	-0.24190969	5037
COAD	PEBP1	CellCycle	0.365963	None	0.453774702	5037
COAD	PEBP1	DNADamage	0.829731	None	0.108822439	5037
COAD	PEBP1	EMT	0.657582	None	-0.583711535	5037
COAD	PEBP1	Hormone AR	0.706177	None	-0.135979702	5037
COAD	PEBP1	Hormone ER	0.842403	None	0.026755618	5037
COAD	PEBP1	PI3KAKT	0.842403	None	0.149959725	5037
COAD	PEBP1	RASMAPK	0.842403	None	-0.089297411	5037
COAD	PEBP1	RTK	0.706177	None	-0.197389949	5037
COAD	PEBP1	TSCmTOR	0.842403	None	-0.038390606	5037
COAD	YY1	Apoptosis	0.603218	None	0.236914442	7528
COAD	YY1	CellCycle	0.512344	None	0.247987417	7528
COAD	YY1	DNADamage	0.72324	None	0.056598611	7528
COAD	YY1	EMT	0.72324	None	-0.171203999	7528
COAD	YY1	Hormone AR	0.621529	None	0.108913917	7528
COAD	YY1	Hormone ER	0.72324	None	-0.038412752	7528
COAD	YY1	PI3KAKT	0.172248	None	-0.58434037	7528
COAD	YY1	RASMAPK	0.0378438	Inhibition	-0.856314416	7528
COAD	YY1	RTK	0.0226963	Inhibition	-0.56430554	7528
COAD	YY1	TSCmTOR	0.440212	None	-0.259774589	7528
DLBC	PEBP1	Apoptosis	0.834628	None	0.388034087	5037
DLBC	PEBP1	CellCycle	0.910584	None	-0.049788916	5037
DLBC	PEBP1	DNADamage	0.910584	None	-0.134554374	5037
DLBC	PEBP1	EMT	0.377746	None	0.738488407	5037
DLBC	PEBP1	Hormone AR	0.910584	None	0.109677456	5037
DLBC	PEBP1	Hormone ER	0.910584	None	0.058188037	5037
DLBC	PEBP1	PI3KAKT	0.848729	None	-0.511789785	5037
DLBC	PEBP1	RASMAPK	0.834628	None	-0.435793007	5037
DLBC	PEBP1	RTK	0.808406	None	-0.601738373	5037
DLBC	PEBP1	TSCmTOR	0.377746	None	-0.723240071	5037
DLBC	YY1	Apoptosis	0.7711	None	-0.137081924	7528
DLBC	YY1	CellCycle	0.7711	None	0.408716876	7528
DLBC	YY1	DNADamage	0.7711	None	0.353365823	7528
DLBC	YY1	EMT	0.630671	None	-0.561243045	7528
DLBC	YY1	Hormone AR	0.630671	None	0.594203882	7528
DLBC	YY1	Hormone ER	0.630671	None	-0.332164896	7528
DLBC	YY1	PI3KAKT	0.7711	None	0.534401564	7528
DLBC	YY1	RASMAPK	0.7711	None	0.160722184	7528
DLBC	YY1	RTK	0.7711	None	0.414188705	7528
DLBC	YY1	TSCmTOR	0.7711	None	0.142171227	7528
ESCA	PEBP1	Apoptosis	0.587084	None	0.42370738	5037
ESCA	PEBP1	CellCycle	0.587084	None	0.339990536	5037
ESCA	PEBP1	DNADamage	0.669825	None	0.17035488	5037
ESCA	PEBP1	EMT	0.669825	None	-0.300089467	5037
ESCA	PEBP1	Hormone AR	0.669825	None	0.201458983	5037
ESCA	PEBP1	Hormone ER	0.669825	None	0.121398803	5037
ESCA	PEBP1	PI3KAKT	0.587084	None	-0.378729323	5037
ESCA	PEBP1	RASMAPK	0.669825	None	-0.196046591	5037
ESCA	PEBP1	RTK	0.669825	None	0.194487381	5037
ESCA	PEBP1	TSCmTOR	0.910262	None	-0.026575704	5037
ESCA	YY1	Apoptosis	0.644208	None	0.1280769	7528
ESCA	YY1	CellCycle	0.388013	None	0.268460619	7528
ESCA	YY1	DNADamage	0.450939	None	0.319758381	7528
ESCA	YY1	EMT	0.450939	None	0.449643965	7528
ESCA	YY1	Hormone AR	0.13405	None	-0.517354657	7528
ESCA	YY1	Hormone ER	0.297431	None	-0.175792964	7528
ESCA	YY1	PI3KAKT	0.909804	None	-0.031574326	7528
ESCA	YY1	RASMAPK	0.0288249	Inhibition	-0.649918256	7528
ESCA	YY1	RTK	0.0288249	Inhibition	-1.028883304	7528
ESCA	YY1	TSCmTOR	0.0288249	Inhibition	-0.616844405	7528
GBM	PEBP1	Apoptosis	0.467226	None	-0.286622802	5037
GBM	PEBP1	CellCycle	0.0309319	Inhibition	-1.068759646	5037
GBM	PEBP1	DNADamage	0.26089	None	-0.349700584	5037
GBM	PEBP1	EMT	0.543031	None	0.155196474	5037
GBM	PEBP1	Hormone AR	0.910792	None	-0.019389129	5037
GBM	PEBP1	Hormone ER	0.0602866	None	0.450813934	5037
GBM	PEBP1	PI3KAKT	0.0602866	None	-1.234305724	5037
GBM	PEBP1	RASMAPK	0.835206	None	0.166133178	5037
GBM	PEBP1	RTK	0.0602866	None	-1.113100688	5037
GBM	PEBP1	TSCmTOR	0.115726	None	-0.877415991	5037
GBM	YY1	Apoptosis	0.496483	None	0.437929037	7528
GBM	YY1	CellCycle	0.688271	None	0.199104239	7528
GBM	YY1	DNADamage	0.776859	None	0.074119415	7528
GBM	YY1	EMT	0.688271	None	0.143452667	7528
GBM	YY1	Hormone AR	0.496483	None	0.246377535	7528
GBM	YY1	Hormone ER	0.632687	None	-0.208419159	7528
GBM	YY1	PI3KAKT	0.60049	None	-0.64300876	7528
GBM	YY1	RASMAPK	0.688271	None	-0.252834027	7528
GBM	YY1	RTK	0.648348	None	0.398491261	7528
GBM	YY1	TSCmTOR	0.496483	None	-0.742758655	7528
HNSC	PEBP1	Apoptosis	0.75443	None	-0.06644809	5037
HNSC	PEBP1	CellCycle	0.492493	None	-0.156542901	5037
HNSC	PEBP1	DNADamage	0.492493	None	0.180404215	5037
HNSC	PEBP1	EMT	0.492493	None	-0.290760561	5037
HNSC	PEBP1	Hormone AR	0.354298	None	0.231508192	5037
HNSC	PEBP1	Hormone ER	0.354298	None	0.116374513	5037
HNSC	PEBP1	PI3KAKT	0.594608	None	0.205169091	5037
HNSC	PEBP1	RASMAPK	0.75443	None	-0.054601518	5037
HNSC	PEBP1	RTK	0.354298	None	-0.431262829	5037
HNSC	PEBP1	TSCmTOR	0.354298	None	-0.279302203	5037
HNSC	YY1	Apoptosis	0.993821	None	0.007852291	7528
HNSC	YY1	CellCycle	0.449646	None	0.240311957	7528
HNSC	YY1	DNADamage	0.829956	None	0.094933611	7528
HNSC	YY1	EMT	0.306943	None	-0.663258406	7528
HNSC	YY1	Hormone AR	0.993821	None	-0.001219569	7528
HNSC	YY1	Hormone ER	0.691967	None	-0.063537466	7528
HNSC	YY1	PI3KAKT	0.676625	None	-0.316829098	7528
HNSC	YY1	RASMAPK	0.449646	None	-0.260653007	7528
HNSC	YY1	RTK	0.901442	None	0.089130609	7528
HNSC	YY1	TSCmTOR	0.691967	None	0.15493966	7528
KICH	PEBP1	Apoptosis	0.84846	None	0.059420981	5037
KICH	PEBP1	CellCycle	0.89264	None	-0.036235	5037
KICH	PEBP1	DNADamage	0.629695	None	-0.301451216	5037
KICH	PEBP1	EMT	0.84846	None	-0.141112674	5037
KICH	PEBP1	Hormone AR	0.0942821	None	0.425976068	5037
KICH	PEBP1	Hormone ER	0.589526	None	-0.240690781	5037
KICH	PEBP1	PI3KAKT	0.278888	None	-0.531617869	5037
KICH	PEBP1	RASMAPK	0.589526	None	-0.404909401	5037
KICH	PEBP1	RTK	0.589526	None	-0.389204249	5037
KICH	PEBP1	TSCmTOR	0.629695	None	-0.22848008	5037
KICH	YY1	Apoptosis	0.633406	None	-0.251394068	7528
KICH	YY1	CellCycle	0.633406	None	0.257405547	7528
KICH	YY1	DNADamage	0.633406	None	0.448072831	7528
KICH	YY1	EMT	0.803415	None	0.150917251	7528
KICH	YY1	Hormone AR	0.633406	None	0.169058771	7528
KICH	YY1	Hormone ER	0.746227	None	-0.144063985	7528
KICH	YY1	PI3KAKT	0.803415	None	0.098873625	7528
KICH	YY1	RASMAPK	0.633406	None	0.676611628	7528
KICH	YY1	RTK	0.746227	None	0.222937485	7528
KICH	YY1	TSCmTOR	0.849987	None	0.053132683	7528
KIRC	PEBP1	Apoptosis	0.00145772	Inhibition	-0.387233593	5037
KIRC	PEBP1	CellCycle	0.0150257	Inhibition	-0.333376587	5037
KIRC	PEBP1	DNADamage	0.00739224	Inhibition	-0.308245438	5037
KIRC	PEBP1	EMT	0.204344	None	-0.180697794	5037
KIRC	PEBP1	Hormone AR	0.156589	None	0.124989845	5037
KIRC	PEBP1	Hormone ER	0.450167	None	0.091073352	5037
KIRC	PEBP1	PI3KAKT	0.0347254	Activation	0.417500186	5037
KIRC	PEBP1	RASMAPK	0.0822418	None	-0.384990512	5037
KIRC	PEBP1	RTK	0.0822418	None	-0.358309316	5037
KIRC	PEBP1	TSCmTOR	0.92919	None	0.012886297	5037
KIRC	YY1	Apoptosis	0.904717	None	-0.037533697	7528
KIRC	YY1	CellCycle	0.85386	None	-0.077689127	7528
KIRC	YY1	DNADamage	0.642455	None	-0.115621075	7528
KIRC	YY1	EMT	0.642455	None	0.179968202	7528
KIRC	YY1	Hormone AR	0.642455	None	0.089011382	7528
KIRC	YY1	Hormone ER	0.996199	None	-0.00052041	7528
KIRC	YY1	PI3KAKT	0.904717	None	-0.040287378	7528
KIRC	YY1	RASMAPK	0.746776	None	0.175033262	7528
KIRC	YY1	RTK	0.105936	None	0.44771921	7528
KIRC	YY1	TSCmTOR	0.904717	None	0.051039093	7528
KIRP	PEBP1	Apoptosis	0.891057	None	-0.068724734	5037
KIRP	PEBP1	CellCycle	0.238889	None	0.285726447	5037
KIRP	PEBP1	DNADamage	0.238889	None	-0.25931009	5037
KIRP	PEBP1	EMT	0.999788	None	-0.008908655	5037
KIRP	PEBP1	Hormone AR	0.213705	None	-0.42957794	5037
KIRP	PEBP1	Hormone ER	0.238889	None	0.246408211	5037
KIRP	PEBP1	PI3KAKT	0.213705	None	-0.786709839	5037
KIRP	PEBP1	RASMAPK	0.238889	None	0.281706633	5037
KIRP	PEBP1	RTK	0.408602	None	0.233570971	5037
KIRP	PEBP1	TSCmTOR	0.999788	None	-6.6593e-05	5037
KIRP	YY1	Apoptosis	0.351893	None	-0.232400455	7528
KIRP	YY1	CellCycle	0.0290352	Activation	0.535281953	7528
KIRP	YY1	DNADamage	0.576809	None	0.125410221	7528
KIRP	YY1	EMT	0.107397	None	-0.546072115	7528
KIRP	YY1	Hormone AR	0.00350906	Activation	0.715475648	7528
KIRP	YY1	Hormone ER	0.576809	None	-0.103552006	7528
KIRP	YY1	PI3KAKT	0.946661	None	-0.026118582	7528
KIRP	YY1	RASMAPK	0.81529	None	-0.061434933	7528
KIRP	YY1	RTK	0.0304564	Activation	0.566952992	7528
KIRP	YY1	TSCmTOR	0.351098	None	-0.338062169	7528
LGG	PEBP1	Apoptosis	0.0361898	Inhibition	-0.195473698	5037
LGG	PEBP1	CellCycle	0.179324	None	-0.184257821	5037
LGG	PEBP1	DNADamage	5.07719e-13	Inhibition	-0.996510962	5037
LGG	PEBP1	EMT	0.0996233	None	-0.194895218	5037
LGG	PEBP1	Hormone AR	0.897281	None	-0.01842785	5037
LGG	PEBP1	Hormone ER	0.209321	None	0.110742084	5037
LGG	PEBP1	PI3KAKT	0.0370207	Inhibition	-0.486634259	5037
LGG	PEBP1	RASMAPK	0.985913	None	-0.002729001	5037
LGG	PEBP1	RTK	0.229777	None	-0.256186103	5037
LGG	PEBP1	TSCmTOR	0.392078	None	0.142388324	5037
LGG	YY1	Apoptosis	0.135198	None	0.1430914	7528
LGG	YY1	CellCycle	0.700356	None	0.052347316	7528
LGG	YY1	DNADamage	1.1504e-05	Activation	0.656021371	7528
LGG	YY1	EMT	0.206997	None	0.145836392	7528
LGG	YY1	Hormone AR	0.135198	None	0.145536906	7528
LGG	YY1	Hormone ER	0.897229	None	-0.009378538	7528
LGG	YY1	PI3KAKT	0.228337	None	0.270279352	7528
LGG	YY1	RASMAPK	0.135198	None	0.332104611	7528
LGG	YY1	RTK	0.63354	None	0.121190673	7528
LGG	YY1	TSCmTOR	0.17624	None	-0.240738748	7528
LIHC	PEBP1	Apoptosis	0.000322383	Inhibition	-0.39478923	5037
LIHC	PEBP1	CellCycle	0.110152	None	-0.170993776	5037
LIHC	PEBP1	DNADamage	0.689762	None	0.079901131	5037
LIHC	PEBP1	EMT	0.000192906	Inhibition	-0.617071593	5037
LIHC	PEBP1	Hormone AR	9.32855e-09	Activation	0.584970622	5037
LIHC	PEBP1	Hormone ER	5.84877e-11	Activation	0.797485406	5037
LIHC	PEBP1	PI3KAKT	0.912034	None	0.017576801	5037
LIHC	PEBP1	RASMAPK	5.8188e-05	Activation	0.648755698	5037
LIHC	PEBP1	RTK	6.68322e-10	Activation	0.937137655	5037
LIHC	PEBP1	TSCmTOR	0.812065	None	-0.054353786	5037
LIHC	YY1	Apoptosis	0.897185	None	-0.032602318	7528
LIHC	YY1	CellCycle	0.865738	None	0.052306276	7528
LIHC	YY1	DNADamage	0.865738	None	-0.084229134	7528
LIHC	YY1	EMT	0.897185	None	-0.021626645	7528
LIHC	YY1	Hormone AR	0.865738	None	-0.080690897	7528
LIHC	YY1	Hormone ER	0.865738	None	0.078291109	7528
LIHC	YY1	PI3KAKT	0.302223	None	0.367494725	7528
LIHC	YY1	RASMAPK	0.897185	None	-0.033584102	7528
LIHC	YY1	RTK	0.865738	None	0.118967374	7528
LIHC	YY1	TSCmTOR	0.865738	None	0.09031499	7528
LUAD	PEBP1	Apoptosis	0.450488	None	-0.129608355	5037
LUAD	PEBP1	CellCycle	0.0859098	None	-0.372929487	5037
LUAD	PEBP1	DNADamage	0.168516	None	0.247965526	5037
LUAD	PEBP1	EMT	2.1679e-05	Inhibition	-1.030753111	5037
LUAD	PEBP1	Hormone AR	0.0859098	None	0.353596357	5037
LUAD	PEBP1	Hormone ER	0.0981007	None	0.161457769	5037
LUAD	PEBP1	PI3KAKT	0.258953	None	0.325895068	5037
LUAD	PEBP1	RASMAPK	0.293783	None	0.234476471	5037
LUAD	PEBP1	RTK	0.723281	None	-0.076235544	5037
LUAD	PEBP1	TSCmTOR	0.293783	None	0.199715638	5037
LUAD	YY1	Apoptosis	0.00355266	Activation	0.521948424	7528
LUAD	YY1	CellCycle	0.000118241	Activation	0.711306148	7528
LUAD	YY1	DNADamage	0.33908	None	0.169586679	7528
LUAD	YY1	EMT	0.143554	None	0.416670983	7528
LUAD	YY1	Hormone AR	0.981486	None	-0.003694469	7528
LUAD	YY1	Hormone ER	0.228737	None	-0.123870612	7528
LUAD	YY1	PI3KAKT	0.539301	None	-0.15947603	7528
LUAD	YY1	RASMAPK	0.0246562	Inhibition	-0.524754174	7528
LUAD	YY1	RTK	0.539301	None	-0.162885141	7528
LUAD	YY1	TSCmTOR	0.33908	None	-0.209642962	7528
LUSC	PEBP1	Apoptosis	0.989658	None	-0.002002515	5037
LUSC	PEBP1	CellCycle	0.313627	None	0.214187254	5037
LUSC	PEBP1	DNADamage	0.0167433	Activation	0.422090084	5037
LUSC	PEBP1	EMT	0.540173	None	-0.189235469	5037
LUSC	PEBP1	Hormone AR	0.00343781	Activation	0.487232714	5037
LUSC	PEBP1	Hormone ER	0.0605979	None	0.154809406	5037
LUSC	PEBP1	PI3KAKT	0.540173	None	0.312810716	5037
LUSC	PEBP1	RASMAPK	0.313627	None	-0.258037261	5037
LUSC	PEBP1	RTK	0.595352	None	-0.145127579	5037
LUSC	PEBP1	TSCmTOR	0.91554	None	0.043915365	5037
LUSC	YY1	Apoptosis	0.048838	Activation	0.374239029	7528
LUSC	YY1	CellCycle	0.142003	None	0.288165161	7528
LUSC	YY1	DNADamage	0.309799	None	-0.191259369	7528
LUSC	YY1	EMT	0.192102	None	-0.357983742	7528
LUSC	YY1	Hormone AR	0.0401825	Inhibition	-0.36402991	7528
LUSC	YY1	Hormone ER	0.0107579	Inhibition	-0.212757783	7528
LUSC	YY1	PI3KAKT	0.995023	None	0.0021782	7528
LUSC	YY1	RASMAPK	0.736676	None	-0.077767567	7528
LUSC	YY1	RTK	0.736676	None	-0.088107717	7528
LUSC	YY1	TSCmTOR	0.472061	None	0.191252657	7528
MESO	PEBP1	Apoptosis	0.510924	None	-0.3312582	5037
MESO	PEBP1	CellCycle	0.449895	None	-0.570305037	5037
MESO	PEBP1	DNADamage	0.510924	None	0.538068039	5037
MESO	PEBP1	EMT	0.449895	None	-0.771466163	5037
MESO	PEBP1	Hormone AR	0.881822	None	0.079778103	5037
MESO	PEBP1	Hormone ER	0.881822	None	-0.055855679	5037
MESO	PEBP1	PI3KAKT	0.881822	None	-0.252186899	5037
MESO	PEBP1	RASMAPK	0.881822	None	-0.240548364	5037
MESO	PEBP1	RTK	0.881822	None	0.162453497	5037
MESO	PEBP1	TSCmTOR	0.88428	None	-0.071271245	5037
MESO	YY1	Apoptosis	0.557199	None	0.293966184	7528
MESO	YY1	CellCycle	0.972681	None	0.011940572	7528
MESO	YY1	DNADamage	0.769492	None	0.238661762	7528
MESO	YY1	EMT	0.0644159	None	-1.098757761	7528
MESO	YY1	Hormone AR	0.769492	None	-0.101938296	7528
MESO	YY1	Hormone ER	0.434724	None	-0.349631597	7528
MESO	YY1	PI3KAKT	0.636402	None	0.450781082	7528
MESO	YY1	RASMAPK	0.557199	None	-0.56272589	7528
MESO	YY1	RTK	0.769492	None	0.243543468	7528
MESO	YY1	TSCmTOR	0.769492	None	-0.206576034	7528
OV	PEBP1	Apoptosis	0.709924	None	-0.068489965	5037
OV	PEBP1	CellCycle	0.036439	Activation	0.66810223	5037
OV	PEBP1	DNADamage	0.121965	None	0.443907422	5037
OV	PEBP1	EMT	0.00814731	Inhibition	-0.998975981	5037
OV	PEBP1	Hormone AR	0.121965	None	0.376170467	5037
OV	PEBP1	Hormone ER	0.150095	None	0.421853915	5037
OV	PEBP1	PI3KAKT	0.121965	None	-0.669060944	5037
OV	PEBP1	RASMAPK	0.150095	None	-0.559835492	5037
OV	PEBP1	RTK	0.364652	None	0.150975939	5037
OV	PEBP1	TSCmTOR	0.0640419	None	-0.488609518	5037
OV	YY1	Apoptosis	0.974431	None	0.29665989	7528
OV	YY1	CellCycle	0.974431	None	0.101396048	7528
OV	YY1	DNADamage	0.974431	None	0.110220124	7528
OV	YY1	EMT	0.974431	None	-0.077654348	7528
OV	YY1	Hormone AR	0.974431	None	0.077776243	7528
OV	YY1	Hormone ER	0.974431	None	0.010537123	7528
OV	YY1	PI3KAKT	0.974431	None	0.052936156	7528
OV	YY1	RASMAPK	0.974431	None	-0.011458044	7528
OV	YY1	RTK	0.974431	None	-0.083449676	7528
OV	YY1	TSCmTOR	0.974431	None	-0.109099867	7528
PAAD	PEBP1	Apoptosis	0.213996	None	-0.575818711	5037
PAAD	PEBP1	CellCycle	0.805417	None	-0.068509944	5037
PAAD	PEBP1	DNADamage	0.338089	None	0.449093144	5037
PAAD	PEBP1	EMT	0.243481	None	-0.735805825	5037
PAAD	PEBP1	Hormone AR	0.51501	None	0.312268092	5037
PAAD	PEBP1	Hormone ER	0.805417	None	0.041550811	5037
PAAD	PEBP1	PI3KAKT	0.131285	None	0.949937338	5037
PAAD	PEBP1	RASMAPK	0.213996	None	-0.50398285	5037
PAAD	PEBP1	RTK	0.243481	None	-0.377039528	5037
PAAD	PEBP1	TSCmTOR	0.243481	None	0.44618658	5037
PAAD	YY1	Apoptosis	0.104436	None	0.700427831	7528
PAAD	YY1	CellCycle	0.0235603	Activation	0.633446784	7528
PAAD	YY1	DNADamage	0.814105	None	0.088260386	7528
PAAD	YY1	EMT	0.727437	None	0.227258328	7528
PAAD	YY1	Hormone AR	0.727437	None	0.185273053	7528
PAAD	YY1	Hormone ER	0.727437	None	0.092167387	7528
PAAD	YY1	PI3KAKT	0.229145	None	-0.653120916	7528
PAAD	YY1	RASMAPK	0.727437	None	0.150239555	7528
PAAD	YY1	RTK	0.229145	None	0.441638649	7528
PAAD	YY1	TSCmTOR	0.614341	None	-0.293402367	7528
PCPG	PEBP1	Apoptosis	0.724771	None	0.351390306	5037
PCPG	PEBP1	CellCycle	0.943462	None	-0.015831011	5037
PCPG	PEBP1	DNADamage	0.752559	None	0.20214007	5037
PCPG	PEBP1	EMT	0.943462	None	0.019379304	5037
PCPG	PEBP1	Hormone AR	0.724771	None	0.297830589	5037
PCPG	PEBP1	Hormone ER	0.724771	None	-0.208808755	5037
PCPG	PEBP1	PI3KAKT	0.312631	None	-0.87274864	5037
PCPG	PEBP1	RASMAPK	0.752559	None	-0.248980924	5037
PCPG	PEBP1	RTK	0.724771	None	-0.25269447	5037
PCPG	PEBP1	TSCmTOR	0.943462	None	-0.134073913	5037
PCPG	YY1	Apoptosis	0.870455	None	-0.057779266	7528
PCPG	YY1	CellCycle	0.276071	None	0.455084256	7528
PCPG	YY1	DNADamage	0.439539	None	0.340369436	7528
PCPG	YY1	EMT	0.276071	None	-0.36532698	7528
PCPG	YY1	Hormone AR	0.439539	None	0.352599904	7528
PCPG	YY1	Hormone ER	0.783295	None	0.096939952	7528
PCPG	YY1	PI3KAKT	0.783295	None	0.216991097	7528
PCPG	YY1	RASMAPK	0.439539	None	0.416785868	7528
PCPG	YY1	RTK	0.391321	None	0.388820595	7528
PCPG	YY1	TSCmTOR	0.870455	None	0.124558405	7528
PRAD	PEBP1	Apoptosis	0.328208	None	0.083238369	5037
PRAD	PEBP1	CellCycle	0.0543772	None	0.17765458	5037
PRAD	PEBP1	DNADamage	0.0704145	None	0.217321747	5037
PRAD	PEBP1	EMT	0.0543772	None	-0.435377026	5037
PRAD	PEBP1	Hormone AR	2.9541e-05	Activation	0.545730642	5037
PRAD	PEBP1	Hormone ER	0.108455	None	-0.102787119	5037
PRAD	PEBP1	PI3KAKT	5.46364e-07	Inhibition	-1.268961088	5037
PRAD	PEBP1	RASMAPK	2.9541e-05	Inhibition	-0.904221293	5037
PRAD	PEBP1	RTK	2.9541e-05	Inhibition	-0.615841304	5037
PRAD	PEBP1	TSCmTOR	2.32013e-06	Inhibition	-0.927795857	5037
PRAD	YY1	Apoptosis	4.6959e-05	Activation	0.374064275	7528
PRAD	YY1	CellCycle	0.0427104	Activation	0.175060079	7528
PRAD	YY1	DNADamage	0.000276226	Activation	0.44456719	7528
PRAD	YY1	EMT	0.00781722	Inhibition	-0.586253445	7528
PRAD	YY1	Hormone AR	4.6959e-05	Activation	0.559550834	7528
PRAD	YY1	Hormone ER	0.612425	None	-0.03181523	7528
PRAD	YY1	PI3KAKT	0.00444596	Inhibition	-0.723730691	7528
PRAD	YY1	RASMAPK	0.000276226	Inhibition	-0.799040758	7528
PRAD	YY1	RTK	0.00944194	Inhibition	-0.383969516	7528
PRAD	YY1	TSCmTOR	0.0301332	Inhibition	-0.421601499	7528
READ	PEBP1	Apoptosis	0.779953	None	-0.573916522	5037
READ	PEBP1	CellCycle	0.779953	None	-0.289766831	5037
READ	PEBP1	DNADamage	0.155034	None	0.871660545	5037
READ	PEBP1	EMT	0.779953	None	-0.190181854	5037
READ	PEBP1	Hormone AR	0.779953	None	0.207262909	5037
READ	PEBP1	Hormone ER	0.779953	None	-0.143414009	5037
READ	PEBP1	PI3KAKT	0.779953	None	-0.214014116	5037
READ	PEBP1	RASMAPK	0.779953	None	-0.488536856	5037
READ	PEBP1	RTK	0.779953	None	-0.099321719	5037
READ	PEBP1	TSCmTOR	0.779953	None	-0.130314089	5037
READ	YY1	Apoptosis	0.951511	None	0.724565306	7528
READ	YY1	CellCycle	0.993534	None	0.04255604	7528
READ	YY1	DNADamage	0.993534	None	0.109331593	7528
READ	YY1	EMT	0.993534	None	-0.321062857	7528
READ	YY1	Hormone AR	0.993534	None	0.119559366	7528
READ	YY1	Hormone ER	0.993534	None	-0.050205104	7528
READ	YY1	PI3KAKT	0.993534	None	0.047287453	7528
READ	YY1	RASMAPK	0.993534	None	-0.20507733	7528
READ	YY1	RTK	0.993534	None	-0.063281173	7528
READ	YY1	TSCmTOR	0.993534	None	0.002607055	7528
SARC	PEBP1	Apoptosis	0.0116457	Inhibition	-0.482733303	5037
SARC	PEBP1	CellCycle	0.00308503	Inhibition	-0.832483471	5037
SARC	PEBP1	DNADamage	0.136601	None	0.414865803	5037
SARC	PEBP1	EMT	0.593675	None	-0.126559441	5037
SARC	PEBP1	Hormone AR	0.074902	None	0.442717346	5037
SARC	PEBP1	Hormone ER	0.0569553	None	0.333720516	5037
SARC	PEBP1	PI3KAKT	0.195474	None	-0.542261509	5037
SARC	PEBP1	RASMAPK	0.853792	None	-0.044412382	5037
SARC	PEBP1	RTK	0.0116457	Inhibition	-0.620700492	5037
SARC	PEBP1	TSCmTOR	0.0116457	Inhibition	-0.64059853	5037
SARC	YY1	Apoptosis	0.718464	None	0.076660834	7528
SARC	YY1	CellCycle	0.000582709	Activation	0.925763962	7528
SARC	YY1	DNADamage	0.384231	None	-0.356404142	7528
SARC	YY1	EMT	0.493825	None	-0.235493543	7528
SARC	YY1	Hormone AR	0.75253	None	-0.069892968	7528
SARC	YY1	Hormone ER	0.0264459	Inhibition	-0.422038216	7528
SARC	YY1	PI3KAKT	0.0779273	None	0.87064359	7528
SARC	YY1	RASMAPK	0.718464	None	-0.156337428	7528
SARC	YY1	RTK	0.718464	None	-0.122147803	7528
SARC	YY1	TSCmTOR	0.718464	None	0.139626652	7528
SKCM	PEBP1	Apoptosis	0.918927	None	0.033922286	5037
SKCM	PEBP1	CellCycle	0.918927	None	0.204542824	5037
SKCM	PEBP1	DNADamage	0.918927	None	0.116660287	5037
SKCM	PEBP1	EMT	0.918927	None	-0.037966545	5037
SKCM	PEBP1	Hormone AR	0.918927	None	0.057729713	5037
SKCM	PEBP1	Hormone ER	0.918927	None	0.060968592	5037
SKCM	PEBP1	PI3KAKT	0.320268	None	-1.020335316	5037
SKCM	PEBP1	RASMAPK	0.918927	None	0.229045754	5037
SKCM	PEBP1	RTK	0.320268	None	-0.402542989	5037
SKCM	PEBP1	TSCmTOR	0.320268	None	0.558991001	5037
SKCM	YY1	Apoptosis	0.863125	None	-0.094865998	7528
SKCM	YY1	CellCycle	0.960529	None	0.014147123	7528
SKCM	YY1	DNADamage	0.482409	None	0.340759819	7528
SKCM	YY1	EMT	0.557097	None	-0.374789329	7528
SKCM	YY1	Hormone AR	0.24197	None	0.497575921	7528
SKCM	YY1	Hormone ER	0.863125	None	0.045976968	7528
SKCM	YY1	PI3KAKT	0.863125	None	0.172576857	7528
SKCM	YY1	RASMAPK	0.24197	None	-0.670339841	7528
SKCM	YY1	RTK	0.24197	None	-0.416658613	7528
SKCM	YY1	TSCmTOR	0.685327	None	-0.277582087	7528
STAD	PEBP1	Apoptosis	0.927624	None	-0.098432545	5037
STAD	PEBP1	CellCycle	0.927624	None	0.221977136	5037
STAD	PEBP1	DNADamage	0.927624	None	0.060062647	5037
STAD	PEBP1	EMT	0.927624	None	-0.391609101	5037
STAD	PEBP1	Hormone AR	0.927624	None	-0.037999581	5037
STAD	PEBP1	Hormone ER	0.927624	None	-0.055440605	5037
STAD	PEBP1	PI3KAKT	0.927624	None	0.033825252	5037
STAD	PEBP1	RASMAPK	0.927624	None	-0.0170625	5037
STAD	PEBP1	RTK	0.927624	None	-0.1859008	5037
STAD	PEBP1	TSCmTOR	0.927624	None	0.117245198	5037
STAD	YY1	Apoptosis	0.120074	None	0.410353859	7528
STAD	YY1	CellCycle	0.00915602	Activation	0.65146774	7528
STAD	YY1	DNADamage	0.0545271	None	0.439411907	7528
STAD	YY1	EMT	0.00101054	Inhibition	-1.048710588	7528
STAD	YY1	Hormone AR	0.365787	None	0.246084147	7528
STAD	YY1	Hormone ER	0.0534331	None	-0.15514613	7528
STAD	YY1	PI3KAKT	0.680347	None	0.117824049	7528
STAD	YY1	RASMAPK	0.680347	None	-0.100252258	7528
STAD	YY1	RTK	0.981431	None	0.005259115	7528
STAD	YY1	TSCmTOR	0.375395	None	0.216896675	7528
TGCT	PEBP1	Apoptosis	0.600981	None	0.231709472	5037
TGCT	PEBP1	CellCycle	0.243861	None	0.404530642	5037
TGCT	PEBP1	DNADamage	0.745709	None	-0.207253163	5037
TGCT	PEBP1	EMT	0.044495	Inhibition	-0.784684475	5037
TGCT	PEBP1	Hormone AR	0.826141	None	0.050967058	5037
TGCT	PEBP1	Hormone ER	0.826141	None	-0.045874185	5037
TGCT	PEBP1	PI3KAKT	0.243861	None	-0.387857116	5037
TGCT	PEBP1	RASMAPK	0.243861	None	-0.461519518	5037
TGCT	PEBP1	RTK	0.606578	None	-0.161790258	5037
TGCT	PEBP1	TSCmTOR	0.826141	None	0.05696996	5037
TGCT	YY1	Apoptosis	0.00494555	Activation	0.67984029	7528
TGCT	YY1	CellCycle	5.9832e-05	Activation	1.0658646	7528
TGCT	YY1	DNADamage	0.00827304	Activation	0.914632513	7528
TGCT	YY1	EMT	0.0290655	Inhibition	-0.64557762	7528
TGCT	YY1	Hormone AR	0.101576	None	0.403091404	7528
TGCT	YY1	Hormone ER	0.00333464	Activation	0.594044367	7528
TGCT	YY1	PI3KAKT	0.457872	None	0.16240055	7528
TGCT	YY1	RASMAPK	0.00407793	Inhibition	-0.756350369	7528
TGCT	YY1	RTK	0.0262155	Inhibition	-0.42480271	7528
TGCT	YY1	TSCmTOR	0.183088	None	-0.224546911	7528
THCA	PEBP1	Apoptosis	0.020777	Inhibition	-0.284451293	5037
THCA	PEBP1	CellCycle	3.41379e-06	Activation	0.830798694	5037
THCA	PEBP1	DNADamage	0.000334772	Activation	0.424172473	5037
THCA	PEBP1	EMT	1.59439e-09	Inhibition	-1.478118134	5037
THCA	PEBP1	Hormone AR	1.62329e-15	Activation	1.722197137	5037
THCA	PEBP1	Hormone ER	0.719687	None	0.044347309	5037
THCA	PEBP1	PI3KAKT	0.020777	Activation	0.541256508	5037
THCA	PEBP1	RASMAPK	0.0261421	Activation	0.37215868	5037
THCA	PEBP1	RTK	3.14172e-07	Activation	0.800233306	5037
THCA	PEBP1	TSCmTOR	0.719687	None	0.06276473	5037
THCA	YY1	Apoptosis	0.0641015	None	-0.312290687	7528
THCA	YY1	CellCycle	0.609836	None	0.105198659	7528
THCA	YY1	DNADamage	0.37111	None	-0.182099536	7528
THCA	YY1	EMT	0.476557	None	-0.252459401	7528
THCA	YY1	Hormone AR	0.609836	None	0.140681948	7528
THCA	YY1	Hormone ER	0.414075	None	-0.14414755	7528
THCA	YY1	PI3KAKT	0.476557	None	-0.215486602	7528
THCA	YY1	RASMAPK	0.888018	None	0.022716518	7528
THCA	YY1	RTK	0.37111	None	-0.26328452	7528
THCA	YY1	TSCmTOR	0.434285	None	-0.21550691	7528
THYM	PEBP1	Apoptosis	0.942617	None	0.015489237	5037
THYM	PEBP1	CellCycle	0.315489	None	-0.658466222	5037
THYM	PEBP1	DNADamage	0.406844	None	-0.276588282	5037
THYM	PEBP1	EMT	0.523399	None	0.204557222	5037
THYM	PEBP1	Hormone AR	0.523399	None	-0.237324076	5037
THYM	PEBP1	Hormone ER	0.378499	None	0.220441031	5037
THYM	PEBP1	PI3KAKT	0.523399	None	-0.273358143	5037
THYM	PEBP1	RASMAPK	0.523399	None	-0.207295123	5037
THYM	PEBP1	RTK	0.378499	None	-0.341007713	5037
THYM	PEBP1	TSCmTOR	0.401924	None	-0.259482926	5037
THYM	YY1	Apoptosis	0.834946	None	-0.242628797	7528
THYM	YY1	CellCycle	0.480255	None	0.605514798	7528
THYM	YY1	DNADamage	0.960217	None	0.034682383	7528
THYM	YY1	EMT	0.931297	None	-0.180456797	7528
THYM	YY1	Hormone AR	0.834946	None	0.272508134	7528
THYM	YY1	Hormone ER	0.69946	None	-0.204800393	7528
THYM	YY1	PI3KAKT	0.931297	None	-0.182010871	7528
THYM	YY1	RASMAPK	0.960217	None	-0.065314373	7528
THYM	YY1	RTK	0.960217	None	-0.013532786	7528
THYM	YY1	TSCmTOR	0.960217	None	0.009239218	7528
UCEC	PEBP1	Apoptosis	0.880223	None	-0.046745846	5037
UCEC	PEBP1	CellCycle	0.880223	None	-0.19510856	5037
UCEC	PEBP1	DNADamage	0.708394	None	-0.291797964	5037
UCEC	PEBP1	EMT	0.00191651	Inhibition	-1.264482855	5037
UCEC	PEBP1	Hormone AR	0.880223	None	-0.055495036	5037
UCEC	PEBP1	Hormone ER	0.00191651	Activation	1.256010108	5037
UCEC	PEBP1	PI3KAKT	0.0405937	Activation	1.352252789	5037
UCEC	PEBP1	RASMAPK	0.880223	None	0.273510833	5037
UCEC	PEBP1	RTK	0.880223	None	-0.07411618	5037
UCEC	PEBP1	TSCmTOR	0.880223	None	0.037780442	5037
UCEC	YY1	Apoptosis	0.459987	None	-0.277308522	7528
UCEC	YY1	CellCycle	0.0302199	Activation	0.869271968	7528
UCEC	YY1	DNADamage	0.0205548	Activation	0.785129611	7528
UCEC	YY1	EMT	0.459987	None	0.390696438	7528
UCEC	YY1	Hormone AR	0.683272	None	0.10252241	7528
UCEC	YY1	Hormone ER	0.0302199	Inhibition	-0.887428458	7528
UCEC	YY1	PI3KAKT	0.0205548	Inhibition	-1.53957862	7528
UCEC	YY1	RASMAPK	0.418108	None	-0.504362117	7528
UCEC	YY1	RTK	0.47017	None	-0.255424261	7528
UCEC	YY1	TSCmTOR	0.947852	None	-0.016619956	7528
UCS	PEBP1	Apoptosis	0.707284	None	0.430128107	5037
UCS	PEBP1	CellCycle	0.977548	None	0.11154414	5037
UCS	PEBP1	DNADamage	0.977548	None	0.246789434	5037
UCS	PEBP1	EMT	0.977548	None	0.029766677	5037
UCS	PEBP1	Hormone AR	0.953128	None	0.518515405	5037
UCS	PEBP1	Hormone ER	0.27724	None	0.589546347	5037
UCS	PEBP1	PI3KAKT	0.977548	None	-0.405776473	5037
UCS	PEBP1	RASMAPK	0.977548	None	-0.011308615	5037
UCS	PEBP1	RTK	0.977548	None	0.036904038	5037
UCS	PEBP1	TSCmTOR	0.707284	None	-0.708958463	5037
UCS	YY1	Apoptosis	0.772812	None	-0.249450192	7528
UCS	YY1	CellCycle	0.99205	None	0.008412456	7528
UCS	YY1	DNADamage	0.99205	None	-0.006940108	7528
UCS	YY1	EMT	0.657422	None	-0.678880447	7528
UCS	YY1	Hormone AR	0.808161	None	-0.278256575	7528
UCS	YY1	Hormone ER	0.772812	None	-0.167736856	7528
UCS	YY1	PI3KAKT	0.657422	None	0.86858377	7528
UCS	YY1	RASMAPK	0.772812	None	0.283041801	7528
UCS	YY1	RTK	0.546535	None	0.665470952	7528
UCS	YY1	TSCmTOR	0.462559	None	1.013862329	7528
UVM	PEBP1	Apoptosis	0.451215	None	-0.91669305	5037
UVM	PEBP1	CellCycle	0.817103	None	0.350437131	5037
UVM	PEBP1	DNADamage	0.819314	None	-0.243727129	5037
UVM	PEBP1	EMT	0.817103	None	-0.48054518	5037
UVM	PEBP1	Hormone AR	0.817103	None	-0.55843426	5037
UVM	PEBP1	Hormone ER	0.451215	None	-0.634225961	5037
UVM	PEBP1	PI3KAKT	0.817103	None	0.47683433	5037
UVM	PEBP1	RASMAPK	0.817103	None	-0.331941123	5037
UVM	PEBP1	RTK	0.819314	None	-0.10774386	5037
UVM	PEBP1	TSCmTOR	0.817103	None	0.580311286	5037
UVM	YY1	Apoptosis	0.586597	None	0.514825123	7528
UVM	YY1	CellCycle	0.318479	None	0.885022816	7528
UVM	YY1	DNADamage	0.586597	None	0.880152557	7528
UVM	YY1	EMT	0.741494	None	-0.24781119	7528
UVM	YY1	Hormone AR	0.318479	None	1.071910794	7528
UVM	YY1	Hormone ER	0.586597	None	0.312036528	7528
UVM	YY1	PI3KAKT	0.586597	None	-0.810125241	7528
UVM	YY1	RASMAPK	0.318479	None	-0.823783346	7528
UVM	YY1	RTK	0.741494	None	-0.142999588	7528
UVM	YY1	TSCmTOR	0.741494	None	-0.551877903	7528
