# Supplementary material for: Cross-Talks between RKIP and YY1 through a Multilevel Bioinformatics Pan-Cancer Analysis
Source: Preprints.org preprint supplement (doi:10.20944/preprints202309.0467.v1), 2023-09-07
Supplement: Supplementary file 17 [file Table S8.xlsx]

## Sheet: Table S8
cancertype	symbol	cell_type	logfc	p_value	fdr	entrez
BLCA	YY1	CD4_naive		0.18119	0.727317	7528
BLCA	YY1	CD8_naive	-0.411828	0.391555	0.863762	7528
BLCA	YY1	Cytotoxic	0.211455	0.306793	0.765263	7528
BLCA	YY1	Exhausted	0.254686	0.502108	0.854638	7528
BLCA	YY1	Tr1	0.101428	0.616751	0.987129	7528
BLCA	YY1	nTreg	-0.117338	0.343509	0.902477	7528
BLCA	YY1	iTreg	0.0526646	0.826973	0.977837	7528
BLCA	YY1	Th1	0.3369	0.440827	0.835133	7528
BLCA	YY1	Th2	0.32913	0.0461412	0.97435	7528
BLCA	YY1	Th17	0.082619	0.738656	0.94748	7528
BLCA	YY1	Tfh	0.229533	0.468422	0.925636	7528
BLCA	YY1	Central_memory	-0.569729	0.875044	0.99811	7528
BLCA	YY1	Effector_memory	0.0773607	0.741281	0.975878	7528
BLCA	YY1	NKT	0.573567	0.108702	0.559763	7528
BLCA	YY1	MAIT	-0.413372	0.100326	0.696429	7528
BLCA	YY1	DC	0.157282	0.375697	0.858561	7528
BLCA	YY1	Bcell	-0.38769	0.200236	0.784842	7528
BLCA	YY1	Monocyte	0.0456803	0.780987	0.993675	7528
BLCA	YY1	Macrophage	0.219749	0.321543	0.883202	7528
BLCA	YY1	NK	0.290539	0.34354	0.889887	7528
BLCA	YY1	Neutrophil	-0.33031	0.131783	0.780672	7528
BLCA	YY1	Gamma_delta	0.137384	0.775049	0.96081	7528
BLCA	YY1	CD4_T	-0.129548	0.469757	0.891553	7528
BLCA	YY1	CD8_T	0.142677	0.458056	0.863884	7528
BLCA	YY1	InfiltrationScore	0.068769	0.428426	0.917096	7528
ESCA	YY1	CD4_naive		0.911225	0.958813	7528
ESCA	YY1	CD8_naive	0.153281	0.643366	1	7528
ESCA	YY1	Cytotoxic	0.236361	0.22691	0.979806	7528
ESCA	YY1	Exhausted	1.42769	0.290535	0.630633	7528
ESCA	YY1	Tr1	-0.164171	0.189431	0.832033	7528
ESCA	YY1	nTreg	0.506674	0.0400413	0.406188	7528
ESCA	YY1	iTreg	0.207653	0.271419	0.970203	7528
ESCA	YY1	Th1	0.284397	0.53013	0.907149	7528
ESCA	YY1	Th2	-0.0713219	0.698675	0.957606	7528
ESCA	YY1	Th17	0.2107	0.269356	0.852093	7528
ESCA	YY1	Tfh	-0.0214974	0.947307	0.997975	7528
ESCA	YY1	Central_memory	0.12639	0.965319	0.994802	7528
ESCA	YY1	Effector_memory	-1.84228	0.913734	0.992907	7528
ESCA	YY1	NKT	-0.950341	0.133231	0.66041	7528
ESCA	YY1	MAIT	0.132219	0.411457	0.880087	7528
ESCA	YY1	DC	-0.0423802	0.813425	0.982406	7528
ESCA	YY1	Bcell	-0.355231	0.43329	0.915023	7528
ESCA	YY1	Monocyte	-0.171545	0.299059	0.832106	7528
ESCA	YY1	Macrophage	-0.0293905	0.723336	0.985026	7528
ESCA	YY1	NK	-0.0619379	0.876219	0.983323	7528
ESCA	YY1	Neutrophil	0.0307948	0.876217	0.996561	7528
ESCA	YY1	Gamma_delta	0.210667	0.214435	0.898414	7528
ESCA	YY1	CD4_T	-0.857106	0.0121947	0.692841	7528
ESCA	YY1	CD8_T	0.360944	0.0649524	0.675743	7528
ESCA	YY1	InfiltrationScore	-0.0602122	0.333233	0.904524	7528
HNSC	YY1	CD4_naive		0.532375	0.713893	7528
HNSC	YY1	CD8_naive	-0.270141	0.6336	0.92467	7528
HNSC	YY1	Cytotoxic	0.0464042	0.914734	0.988693	7528
HNSC	YY1	Exhausted	0.129062	0.990355	0.998297	7528
HNSC	YY1	Tr1	-0.174596	0.725904	0.962698	7528
HNSC	YY1	nTreg	-0.161209	0.345703	0.841295	7528
HNSC	YY1	iTreg	-0.159013	0.429986	0.895511	7528
HNSC	YY1	Th1	0.169169	0.659672	0.929242	7528
HNSC	YY1	Th2	-0.0851423	0.603189	0.887096	7528
HNSC	YY1	Th17	-0.148023	0.987599	0.998219	7528
HNSC	YY1	Tfh	-0.071604	0.939422	0.996121	7528
HNSC	YY1	Central_memory	-0.289013	0.601902	0.943744	7528
HNSC	YY1	Effector_memory	-0.0810766	1	1	7528
HNSC	YY1	NKT	0.573869	0.257141	0.698649	7528
HNSC	YY1	MAIT	0.0437448	0.437068	0.914868	7528
HNSC	YY1	DC	-0.21383	0.144964	0.674752	7528
HNSC	YY1	Bcell	-0.291924	0.499511	0.90526	7528
HNSC	YY1	Monocyte	0.185856	0.323236	0.871193	7528
HNSC	YY1	Macrophage	0.250508	0.469324	0.899345	7528
HNSC	YY1	NK	0.268588	0.180214	0.632781	7528
HNSC	YY1	Neutrophil	0.256137	0.180772	0.828082	7528
HNSC	YY1	Gamma_delta	0.32093	0.901044	0.978777	7528
HNSC	YY1	CD4_T	-0.124613	0.590018	0.90224	7528
HNSC	YY1	CD8_T	-0.0309323	0.534141	0.876919	7528
HNSC	YY1	InfiltrationScore	0.0734193	0.528482	0.893151	7528
KIRP	PEBP1	CD4_naive	2.64836	0.00322982	0.0719489	5037
KIRP	PEBP1	CD8_naive	0.86894	0.0406233	0.529164	5037
KIRP	PEBP1	Cytotoxic	-0.0544733	0.411373	0.759891	5037
KIRP	PEBP1	Exhausted	-0.889313	0.143995	0.597346	5037
KIRP	PEBP1	Tr1	0.0293393	0.819185	0.964044	5037
KIRP	PEBP1	nTreg	0.282499	0.665513	0.883481	5037
KIRP	PEBP1	iTreg	-0.000407768	0.877902	0.9746	5037
KIRP	PEBP1	Th1	-0.0969081	0.617044	0.884026	5037
KIRP	PEBP1	Th2	0.123514	0.799811	0.96593	5037
KIRP	PEBP1	Th17	-0.285771	0.279151	0.757676	5037
KIRP	PEBP1	Tfh	0.260044	0.46843	0.836106	5037
KIRP	PEBP1	Central_memory	1.20984	0.0351004	0.531776	5037
KIRP	PEBP1	Effector_memory	0.306935	0.42199	0.811976	5037
KIRP	PEBP1	NKT	-0.402645	0.308641	0.810422	5037
KIRP	PEBP1	MAIT	0.0960641	0.761435	0.953551	5037
KIRP	PEBP1	DC	0.0586179	0.697049	0.938529	5037
KIRP	PEBP1	Bcell	-0.379676	0.492787	0.91042	5037
KIRP	PEBP1	Monocyte	-0.142018	0.383476	0.861377	5037
KIRP	PEBP1	Macrophage	-0.220282	0.370001	0.79713	5037
KIRP	PEBP1	NK	-0.0708492	0.604537	0.876042	5037
KIRP	PEBP1	Neutrophil	0.0343974	0.866683	0.988278	5037
KIRP	PEBP1	Gamma_delta	-0.0250512	0.731678	0.950255	5037
KIRP	PEBP1	CD4_T	0.0933047	0.64242	0.916805	5037
KIRP	PEBP1	CD8_T	0.142764	0.50418	0.86233	5037
KIRP	PEBP1	InfiltrationScore	-0.0442582	0.805341	0.955459	5037
LUAD	PEBP1	CD4_naive	-0.816954	0.0166435	0.620903	5037
LUAD	PEBP1	CD8_naive	0.391589	0.287516	0.738425	5037
LUAD	PEBP1	Cytotoxic	0.0211558	0.967593	0.994445	5037
LUAD	PEBP1	Exhausted	-0.625107	0.190313	0.530507	5037
LUAD	PEBP1	Tr1	0.0940474	0.777934	0.959542	5037
LUAD	PEBP1	nTreg	-0.256697	0.441565	0.819269	5037
LUAD	PEBP1	iTreg	0.0605814	0.816681	0.978647	5037
LUAD	PEBP1	Th1	-0.293253	0.617446	0.869741	5037
LUAD	PEBP1	Th2	-0.284402	0.79446	0.970703	5037
LUAD	PEBP1	Th17	0.141174	0.714629	0.927502	5037
LUAD	PEBP1	Tfh	0.0883205	0.887871	0.983615	5037
LUAD	PEBP1	Central_memory	-0.0451984	0.702175	0.943227	5037
LUAD	PEBP1	Effector_memory	0.0518735	0.63477	0.905694	5037
LUAD	PEBP1	NKT	-0.269281	0.814605	0.964903	5037
LUAD	PEBP1	MAIT	-0.0789065	0.754222	0.908102	5037
LUAD	PEBP1	DC	0.180783	0.461689	0.874347	5037
LUAD	PEBP1	Bcell	-0.343032	0.290809	0.914302	5037
LUAD	PEBP1	Monocyte	-0.391886	0.336688	0.837642	5037
LUAD	PEBP1	Macrophage	0.0309246	1	1	5037
LUAD	PEBP1	NK	0.0827592	0.837162	0.973603	5037
LUAD	PEBP1	Neutrophil	0.101121	0.649776	0.945504	5037
LUAD	PEBP1	Gamma_delta	0.223502	0.574345	0.933911	5037
LUAD	PEBP1	CD4_T	0.233001	0.356281	0.6649	5037
LUAD	PEBP1	CD8_T	-0.38116	0.0957686	0.712351	5037
LUAD	PEBP1	InfiltrationScore	-0.0134496	0.874671	0.994041	5037
LUAD	YY1	CD4_naive		0.719465	0.772346	7528
LUAD	YY1	CD8_naive	0.523941	0.135227	0.597989	7528
LUAD	YY1	Cytotoxic	-0.147315	0.592427	0.895037	7528
LUAD	YY1	Exhausted	0.160547	0.670546	0.873464	7528
LUAD	YY1	Tr1	-0.188201	0.440145	0.858257	7528
LUAD	YY1	nTreg	-0.13342	0.718191	0.930428	7528
LUAD	YY1	iTreg	0.0377293	0.961878	0.997814	7528
LUAD	YY1	Th1	0.422169	0.380451	0.73938	7528
LUAD	YY1	Th2	0.73594	0.0491755	0.611431	7528
LUAD	YY1	Th17	0.0237127	0.969498	0.992259	7528
LUAD	YY1	Tfh	-0.28464	0.20874	0.717248	7528
LUAD	YY1	Central_memory	0.0348397	0.982839	0.998514	7528
LUAD	YY1	Effector_memory	-0.131024	0.834665	0.968229	7528
LUAD	YY1	NKT	-0.269281	0.79978	0.960005	7528
LUAD	YY1	MAIT	0.0401963	0.910565	0.973191	7528
LUAD	YY1	DC	0.517934	0.0363053	0.57555	7528
LUAD	YY1	Bcell	-0.223349	0.518745	0.94366	7528
LUAD	YY1	Monocyte	0.227083	0.318969	0.82813	7528
LUAD	YY1	Macrophage	0.32663	0.216633	0.788564	7528
LUAD	YY1	NK	0.0565714	0.899209	0.987872	7528
LUAD	YY1	Neutrophil	-0.171401	0.597389	0.931971	7528
LUAD	YY1	Gamma_delta	-0.871623	0.339061	0.858479	7528
LUAD	YY1	CD4_T	-0.0988982	0.783446	0.914061	7528
LUAD	YY1	CD8_T	-0.385928	0.0952933	0.712351	7528
LUAD	YY1	InfiltrationScore	0.081982	0.303006	0.884411	7528
LUSC	PEBP1	CD4_naive		0.813569	0.823127	5037
LUSC	PEBP1	CD8_naive	0.114521	0.778113	0.958387	5037
LUSC	PEBP1	Cytotoxic	0.157944	0.620607	0.931759	5037
LUSC	PEBP1	Exhausted	-0.10078	0.888961	0.981811	5037
LUSC	PEBP1	Tr1	0.296613	0.229846	0.874702	5037
LUSC	PEBP1	nTreg	0.434362	0.0938436	0.660181	5037
LUSC	PEBP1	iTreg	0.0379781	0.915095	0.991136	5037
LUSC	PEBP1	Th1	0.0830532	0.774234	0.960296	5037
LUSC	PEBP1	Th2	-0.017889	0.965579	0.996557	5037
LUSC	PEBP1	Th17	-0.0584605	0.923155	0.989057	5037
LUSC	PEBP1	Tfh	-0.642308	0.172049	0.808431	5037
LUSC	PEBP1	Central_memory	0.459644	0.338474	0.888566	5037
LUSC	PEBP1	Effector_memory	1.47406	0.0521445	0.661742	5037
LUSC	PEBP1	NKT	-0.848444	0.24396	0.782311	5037
LUSC	PEBP1	MAIT	-1.43421	0.0303619	0.645751	5037
LUSC	PEBP1	DC	0.210504	0.25651	0.805501	5037
LUSC	PEBP1	Bcell	-0.160655	0.544044	0.903378	5037
LUSC	PEBP1	Monocyte	0.0683236	0.697728	0.962021	5037
LUSC	PEBP1	Macrophage	0.132995	0.675337	0.944811	5037
LUSC	PEBP1	NK	-0.129812	0.302731	0.834078	5037
LUSC	PEBP1	Neutrophil	0.183165	0.418077	0.902018	5037
LUSC	PEBP1	Gamma_delta	-0.129735	0.726103	0.951565	5037
LUSC	PEBP1	CD4_T	-0.0801027	0.712816	0.968393	5037
LUSC	PEBP1	CD8_T	-0.374276	0.105331	0.72627	5037
LUSC	PEBP1	InfiltrationScore	-0.00621465	0.70904	0.953623	5037
SARC	YY1	CD4_naive	1.89826	0.369707	0.633917	7528
SARC	YY1	CD8_naive	-0.185444	0.946291	0.982629	7528
SARC	YY1	Cytotoxic	-0.174815	0.644854	0.936554	7528
SARC	YY1	Exhausted		0.0789627	0.406395	7528
SARC	YY1	Tr1	0.579247	0.14698	0.903278	7528
SARC	YY1	nTreg	-0.0345083	0.946313	0.994858	7528
SARC	YY1	iTreg	0.346072	0.279079	0.838295	7528
SARC	YY1	Th1	-1.16247	0.163584	0.710556	7528
SARC	YY1	Th2	-0.453767	1	1	7528
SARC	YY1	Th17	0.456442	0.215791	0.839984	7528
SARC	YY1	Tfh	-1.02029	0.2812	0.989147	7528
SARC	YY1	Central_memory	-1.43272	0.444454	0.903224	7528
SARC	YY1	Effector_memory	-0.412959	0.814859	0.955195	7528
SARC	YY1	NKT	-2.69352	0.057898	0.586917	7528
SARC	YY1	MAIT	-0.709488	0.759939	0.960622	7528
SARC	YY1	DC	0.307886	0.217728	0.939374	7528
SARC	YY1	Bcell	0.24269	0.340605	0.821023	7528
SARC	YY1	Monocyte	0.250226	0.332815	0.913291	7528
SARC	YY1	Macrophage	0.392843	0.183204	0.994985	7528
SARC	YY1	NK	-0.343191	0.608153	0.896404	7528
SARC	YY1	Neutrophil	0.254094	0.297879	0.76048	7528
SARC	YY1	Gamma_delta	-0.80438	0.179795	0.783574	7528
SARC	YY1	CD4_T	-0.365748	0.300296	0.781201	7528
SARC	YY1	CD8_T	-1.15704	0.101725	0.684617	7528
SARC	YY1	InfiltrationScore	-0.0188743	0.913396	0.993488	7528
SKCM	PEBP1	CD4_naive	-4.58309	0.808653	0.947042	5037
SKCM	PEBP1	CD8_naive	-0.0736592	0.898206	0.999778	5037
SKCM	PEBP1	Cytotoxic	0.153265	0.256088	0.966394	5037
SKCM	PEBP1	Exhausted	0.47278	0.129657	0.817744	5037
SKCM	PEBP1	Tr1	-0.177232	0.485277	0.999387	5037
SKCM	PEBP1	nTreg	-0.0176439	0.832403	0.997758	5037
SKCM	PEBP1	iTreg	-0.0386377	0.725084	0.971874	5037
SKCM	PEBP1	Th1	0.172226	0.433924	0.938862	5037
SKCM	PEBP1	Th2	0.304345	0.035785	0.279575	5037
SKCM	PEBP1	Th17	-0.180716	0.500043	0.953715	5037
SKCM	PEBP1	Tfh	0.0269406	0.887406	0.972677	5037
SKCM	PEBP1	Central_memory	-0.228795	0.601457	0.804619	5037
SKCM	PEBP1	Effector_memory	0.17069	0.596609	0.993114	5037
SKCM	PEBP1	NKT		0.0588303	0.599672	5037
SKCM	PEBP1	MAIT	-0.0757419	0.442909	0.914535	5037
SKCM	PEBP1	DC	-0.0579954	0.652256	0.967912	5037
SKCM	PEBP1	Bcell	-0.278057	0.413619	0.736177	5037
SKCM	PEBP1	Monocyte	-0.13816	0.383856	0.996901	5037
SKCM	PEBP1	Macrophage	-0.0479177	0.618615	0.994095	5037
SKCM	PEBP1	NK	0.160654	0.381378	0.964969	5037
SKCM	PEBP1	Neutrophil	-0.0728397	0.688869	0.947748	5037
SKCM	PEBP1	Gamma_delta	0.123483	0.485631	0.902832	5037
SKCM	PEBP1	CD4_T	0.0522055	0.851461	0.961249	5037
SKCM	PEBP1	CD8_T	0.109617	0.640234	0.934457	5037
SKCM	PEBP1	InfiltrationScore	-0.00870643	0.738832	1	5037
SKCM	YY1	CD4_naive	1.38393	0.489499	0.820657	7528
SKCM	YY1	CD8_naive	0.010046	0.81234	0.998728	7528
SKCM	YY1	Cytotoxic	-0.100591	0.711025	0.99171	7528
SKCM	YY1	Exhausted	0.259292	0.472217	0.932037	7528
SKCM	YY1	Tr1	-0.432101	0.259764	0.999387	7528
SKCM	YY1	nTreg	0.215652	0.159082	0.95292	7528
SKCM	YY1	iTreg	-0.0594383	0.605273	0.949908	7528
SKCM	YY1	Th1	0.146476	0.365062	0.924725	7528
SKCM	YY1	Th2	0.0685454	0.401733	0.730032	7528
SKCM	YY1	Th17	0.127313	0.31633	0.907241	7528
SKCM	YY1	Tfh	-0.339999	0.198146	0.633953	7528
SKCM	YY1	Central_memory	0.0112618	0.827821	0.924464	7528
SKCM	YY1	Effector_memory	0.316768	0.299102	0.967117	7528
SKCM	YY1	NKT	-0.699337	0.768989	0.945067	7528
SKCM	YY1	MAIT	-0.13634	0.719878	0.969078	7528
SKCM	YY1	DC	0.208021	0.0774929	0.799349	7528
SKCM	YY1	Bcell	-0.562891	0.0189304	0.231337	7528
SKCM	YY1	Monocyte	0.02539	0.829838	1	7528
SKCM	YY1	Macrophage	0.133703	0.318893	0.986773	7528
SKCM	YY1	NK	0.0987036	0.675989	0.983939	7528
SKCM	YY1	Neutrophil	0.147705	0.339799	0.83936	7528
SKCM	YY1	Gamma_delta	-0.266962	0.280212	0.826326	7528
SKCM	YY1	CD4_T	-0.188143	0.38999	0.758902	7528
SKCM	YY1	CD8_T	-0.255077	0.200471	0.747319	7528
SKCM	YY1	InfiltrationScore	0.00125556	0.993688	1	7528
STAD	YY1	CD4_naive		0.491046	0.760481	7528
STAD	YY1	CD8_naive	0.0430998	0.907132	0.960664	7528
STAD	YY1	Cytotoxic	0.0309425	0.99284	0.997701	7528
STAD	YY1	Exhausted	-0.228835	0.307737	0.465621	7528
STAD	YY1	Tr1	0.0336413	0.918992	0.972473	7528
STAD	YY1	nTreg	0.157743	0.164258	0.316365	7528
STAD	YY1	iTreg	-0.105059	0.360826	0.798411	7528
STAD	YY1	Th1	0.167479	0.58924	0.724782	7528
STAD	YY1	Th2	0.134453	0.587208	0.958652	7528
STAD	YY1	Th17	0.107158	0.499999	0.865494	7528
STAD	YY1	Tfh	-0.0844198	0.290357	0.772271	7528
STAD	YY1	Central_memory	-0.136205	0.866726	0.982703	7528
STAD	YY1	Effector_memory	-1.62612	0.684455	0.823844	7528
STAD	YY1	NKT	-0.744565	0.0841707	0.224159	7528
STAD	YY1	MAIT	-0.173985	0.663408	0.869703	7528
STAD	YY1	DC	0.274932	0.0945206	0.23437	7528
STAD	YY1	Bcell	0.116745	0.236813	0.465726	7528
STAD	YY1	Monocyte	0.128285	0.167004	0.694575	7528
STAD	YY1	Macrophage	0.157441	0.385719	0.733742	7528
STAD	YY1	NK	-0.209694	0.222327	0.832895	7528
STAD	YY1	Neutrophil	0.0534568	0.720766	0.974373	7528
STAD	YY1	Gamma_delta	-0.172385	0.356122	0.9888	7528
STAD	YY1	CD4_T	-0.266671	0.21174	0.3278	7528
STAD	YY1	CD8_T	-0.0374387	0.723005	0.966966	7528
STAD	YY1	InfiltrationScore	0.0394613	0.467331	0.820279	7528
UCEC	YY1	CD4_naive		0.805917	0.91085	7528
UCEC	YY1	CD8_naive	-0.130315	0.779139	0.911098	7528
UCEC	YY1	Cytotoxic	0.315816	0.0715093	0.141311	7528
UCEC	YY1	Exhausted	0.308269	0.0506008	0.0778368	7528
UCEC	YY1	Tr1	0.435731	0.093015	1	7528
UCEC	YY1	nTreg	0.0726278	0.80455	0.998586	7528
UCEC	YY1	iTreg	0.4146	0.0167484	0.586585	7528
UCEC	YY1	Th1	0.660369	0.0131904	0.0267397	7528
UCEC	YY1	Th2	-0.117409	0.318268	0.611509	7528
UCEC	YY1	Th17	-0.450872	0.0748099	0.150617	7528
UCEC	YY1	Tfh	0.509165	0.128957	0.376793	7528
UCEC	YY1	Central_memory	0.669441	0.10603	0.817616	7528
UCEC	YY1	Effector_memory	0.736643	0.0638181	0.109729	7528
UCEC	YY1	NKT	-0.986058	0.142336	0.838578	7528
UCEC	YY1	MAIT	-0.408648	0.00378871	0.039637	7528
UCEC	YY1	DC	0.162936	0.390979	0.599306	7528
UCEC	YY1	Bcell	-0.116006	0.641169	1	7528
UCEC	YY1	Monocyte	-0.424526	0.0628772	0.605075	7528
UCEC	YY1	Macrophage	0.0374633	0.830196	0.919216	7528
UCEC	YY1	NK	0.119363	0.530748	0.813853	7528
UCEC	YY1	Neutrophil	-0.344825	0.168357	0.301441	7528
UCEC	YY1	Gamma_delta	0.451784	0.073451	0.239515	7528
UCEC	YY1	CD4_T	0.107154	0.653042	0.904235	7528
UCEC	YY1	CD8_T	0.168575	0.196751	0.331824	7528
UCEC	YY1	InfiltrationScore	0.0197319	0.788651	0.91652	7528
