# Supplementary material for: Cross-Talks between RKIP and YY1 through a Multilevel Bioinformatics Pan-Cancer Analysis
Source: Preprints.org preprint supplement (doi:10.20944/preprints202309.0467.v1), 2023-09-07
Supplement: Supplementary file 19 [file Table S9.xlsx]

## Sheet: Table S9
cancertype	symbol	cell_type	cor	p_value	fdr	entrez
ACC	PEBP1	Bcell	0.124197	0.28185	0.676194	5037
ACC	PEBP1	CD4_T	-0.165161	0.151156	0.921928	5037
ACC	PEBP1	CD4_naive	0.219735	0.0548366	0.19102	5037
ACC	PEBP1	CD8_T	0.0115422	0.920639	0.994007	5037
ACC	PEBP1	CD8_naive	0.332078	0.00317232	0.0179507	5037
ACC	PEBP1	Central_memory	0.132536	0.250535	0.670315	5037
ACC	PEBP1	Cytotoxic	-0.0451815	0.696403	0.949361	5037
ACC	PEBP1	DC	-0.310835	0.00593295	0.0428986	5037
ACC	PEBP1	Effector_memory	-0.0543101	0.638984	0.992918	5037
ACC	PEBP1	Exhausted	-0.176632	0.124368	0.41781	5037
ACC	PEBP1	Gamma_delta	0.409084	0.000220737	0.00230921	5037
ACC	PEBP1	InfiltrationScore	-0.411747	0.000198884	0.00360234	5037
ACC	PEBP1	MAIT	0.0762344	0.509913	0.735856	5037
ACC	PEBP1	Macrophage	-0.336317	0.00278488	0.0253745	5037
ACC	PEBP1	Monocyte	-0.103303	0.371295	0.991086	5037
ACC	PEBP1	NK	-0.167974	0.144221	0.330739	5037
ACC	PEBP1	NKT	-0.0822737	0.476869	0.901979	5037
ACC	PEBP1	Neutrophil	-0.136774	0.235567	0.477409	5037
ACC	PEBP1	Tfh	-0.0511418	0.658694	0.810318	5037
ACC	PEBP1	Th1	-0.156349	0.174499	0.414774	5037
ACC	PEBP1	Th17	0.0388494	0.737284	0.867459	5037
ACC	PEBP1	Th2	-0.0521317	0.65251	0.856348	5037
ACC	PEBP1	Tr1	0.0420656	0.71642	0.934772	5037
ACC	PEBP1	iTreg	-0.145887	0.205514	0.395787	5037
ACC	PEBP1	nTreg	0.0389902	0.736366	0.8727	5037
ACC	YY1	Bcell	0.390574	0.000445083	0.00725681	7528
ACC	YY1	CD4_T	-0.148937	0.196093	0.921928	7528
ACC	YY1	CD4_naive	0.422619	0.000128743	0.00392229	7528
ACC	YY1	CD8_T	-0.350854	0.0017572	0.0206236	7528
ACC	YY1	CD8_naive	0.250439	0.0280359	0.0902282	7528
ACC	YY1	Central_memory	0.0339999	0.7691	0.907062	7528
ACC	YY1	Cytotoxic	-0.424331	0.00012006	0.00429876	7528
ACC	YY1	DC	-0.159753	0.165188	0.318506	7528
ACC	YY1	Effector_memory	-0.364234	0.00112796	0.27579	7528
ACC	YY1	Exhausted	-0.406761	0.000241591	0.0196397	7528
ACC	YY1	Gamma_delta	-0.0142429	0.902152	0.998725	7528
ACC	YY1	InfiltrationScore	-0.327868	0.003604	0.0181967	7528
ACC	YY1	MAIT	-0.250736	0.0278438	0.129243	7528
ACC	YY1	Macrophage	-0.326882	0.00371234	0.0261485	7528
ACC	YY1	Monocyte	0.179555	0.11816	0.991086	7528
ACC	YY1	NK	-0.37591	0.000754101	0.0168436	7528
ACC	YY1	NKT	-0.124196	0.281852	0.764362	7528
ACC	YY1	Neutrophil	0.417364	0.000159154	0.00652115	7528
ACC	YY1	Tfh	-0.396808	0.000353053	0.0138479	7528
ACC	YY1	Th1	-0.437203	7.0164e-05	0.00200109	7528
ACC	YY1	Th17	0.437269	6.9965e-05	0.00362359	7528
ACC	YY1	Th2	-0.357623	0.00140752	0.0159583	7528
ACC	YY1	Tr1	-0.0422988	0.714915	0.934772	7528
ACC	YY1	iTreg	-0.448452	4.3094e-05	0.00361881	7528
ACC	YY1	nTreg	-0.394862	0.000379715	0.0691234	7528
BLCA	PEBP1	Bcell	-0.0360804	0.46956	0.766238	5037
BLCA	PEBP1	CD4_T	0.0430189	0.388474	0.677632	5037
BLCA	PEBP1	CD4_naive	0.0335872	0.500824	0.909482	5037
BLCA	PEBP1	CD8_T	-0.00942302	0.850236	0.971063	5037
BLCA	PEBP1	CD8_naive	0.103009	0.0384939	0.15096	5037
BLCA	PEBP1	Central_memory	0.0379465	0.446881	0.988202	5037
BLCA	PEBP1	Cytotoxic	-0.0274826	0.58178	0.69157	5037
BLCA	PEBP1	DC	-0.0306101	0.539551	0.750485	5037
BLCA	PEBP1	Effector_memory	-0.109431	0.0278546	0.210686	5037
BLCA	PEBP1	Exhausted	-0.0792015	0.111949	0.268858	5037
BLCA	PEBP1	Gamma_delta	-0.0154927	0.756216	0.913985	5037
BLCA	PEBP1	InfiltrationScore	-0.0712723	0.152736	0.361891	5037
BLCA	PEBP1	MAIT	-0.00456681	0.927089	0.988866	5037
BLCA	PEBP1	Macrophage	-0.0833653	0.0942597	0.269008	5037
BLCA	PEBP1	Monocyte	-0.0608274	0.222481	0.76955	5037
BLCA	PEBP1	NK	-0.0401912	0.420442	0.599631	5037
BLCA	PEBP1	NKT	0.0108359	0.828107	0.906709	5037
BLCA	PEBP1	Neutrophil	0.0213066	0.669395	0.832157	5037
BLCA	PEBP1	Tfh	-0.023288	0.640717	0.839553	5037
BLCA	PEBP1	Th1	-0.030747	0.537738	0.736877	5037
BLCA	PEBP1	Th17	0.0272681	0.584733	0.731311	5037
BLCA	PEBP1	Th2	0.107556	0.0306627	0.230418	5037
BLCA	PEBP1	Tr1	0.00842034	0.866013	0.941705	5037
BLCA	PEBP1	iTreg	-0.0214475	0.667339	0.869147	5037
BLCA	PEBP1	nTreg	0.0174476	0.726615	0.911056	5037
BLCA	YY1	Bcell	0.011791	0.813223	0.927763	7528
BLCA	YY1	CD4_T	-0.0773979	0.120378	0.343795	7528
BLCA	YY1	CD4_naive	-0.0749958	0.132364	0.52041	7528
BLCA	YY1	CD8_T	0.0497131	0.31889	0.814741	7528
BLCA	YY1	CD8_naive	-0.0593601	0.233859	0.441493	7528
BLCA	YY1	Central_memory	-0.0289075	0.56235	0.988202	7528
BLCA	YY1	Cytotoxic	0.0752076	0.131271	0.260799	7528
BLCA	YY1	DC	0.0590016	0.236701	0.462702	7528
BLCA	YY1	Effector_memory	0.0113902	0.819462	0.971618	7528
BLCA	YY1	Exhausted	0.0280518	0.573981	0.729902	7528
BLCA	YY1	Gamma_delta	-0.0764327	0.125088	0.49703	7528
BLCA	YY1	InfiltrationScore	0.041668	0.403558	0.638806	7528
BLCA	YY1	MAIT	0.0741074	0.137023	0.36551	7528
BLCA	YY1	Macrophage	0.0213128	0.669305	0.833111	7528
BLCA	YY1	Monocyte	-0.055313	0.267352	0.788004	7528
BLCA	YY1	NK	0.0958557	0.0542118	0.188358	7528
BLCA	YY1	NKT	0.0759697	0.127398	0.320329	7528
BLCA	YY1	Neutrophil	-0.0976294	0.0498868	0.233721	7528
BLCA	YY1	Tfh	-0.00915037	0.85452	0.938244	7528
BLCA	YY1	Th1	0.113046	0.0230591	0.105282	7528
BLCA	YY1	Th17	-0.010992	0.82567	0.89315	7528
BLCA	YY1	Th2	0.0714117	0.151932	0.471056	7528
BLCA	YY1	Tr1	-0.0156851	0.753286	0.895724	7528
BLCA	YY1	iTreg	0.00593404	0.905351	0.972242	7528
BLCA	YY1	nTreg	-0.0200139	0.68837	0.8955	7528
BRCA	PEBP1	Bcell	-0.0990012	0.00113503	0.00250987	5037
BRCA	PEBP1	CD4_T	-0.106354	0.000469157	0.00133246	5037
BRCA	PEBP1	CD4_naive	-0.0386244	0.205101	0.979845	5037
BRCA	PEBP1	CD8_T	-0.0274812	0.367369	0.498109	5037
BRCA	PEBP1	CD8_naive	0.192494	1.85995e-10	1.24553e-09	5037
BRCA	PEBP1	Central_memory	-0.0423844	0.164343	0.387172	5037
BRCA	PEBP1	Cytotoxic	-0.0917229	0.00257495	0.00733842	5037
BRCA	PEBP1	DC	-0.0382515	0.209512	0.296776	5037
BRCA	PEBP1	Effector_memory	0.0588501	0.0534022	0.12429	5037
BRCA	PEBP1	Exhausted	-0.0820749	0.00701396	0.0172287	5037
BRCA	PEBP1	Gamma_delta	-0.0211361	0.488163	0.576259	5037
BRCA	PEBP1	InfiltrationScore	-0.0884133	0.00367032	0.0123944	5037
BRCA	PEBP1	MAIT	0.0575326	0.0589808	0.156574	5037
BRCA	PEBP1	Macrophage	0.0808747	0.00789274	0.0334971	5037
BRCA	PEBP1	Monocyte	0.0255164	0.402626	0.63103	5037
BRCA	PEBP1	NK	-0.10731	0.000416484	0.00136102	5037
BRCA	PEBP1	NKT	-0.13014	1.818e-05	0.000126545	5037
BRCA	PEBP1	Neutrophil	0.077306	0.0111158	0.0330517	5037
BRCA	PEBP1	Tfh	-0.116689	0.000123082	0.000514341	5037
BRCA	PEBP1	Th1	-0.05485	0.071837	0.138674	5037
BRCA	PEBP1	Th17	0.0246231	0.419302	0.52311	5037
BRCA	PEBP1	Th2	-0.0388232	0.202776	0.344438	5037
BRCA	PEBP1	Tr1	0.0257386	0.39854	0.720355	5037
BRCA	PEBP1	iTreg	0.00931331	0.760035	0.837084	5037
BRCA	PEBP1	nTreg	0.0347277	0.254606	0.439755	5037
BRCA	YY1	Bcell	-0.105481	0.000522587	0.00124305	7528
BRCA	YY1	CD4_T	-0.0740161	0.0150705	0.0314151	7528
BRCA	YY1	CD4_naive	0.0258726	0.396088	0.979845	7528
BRCA	YY1	CD8_T	-0.067682	0.0262719	0.105829	7528
BRCA	YY1	CD8_naive	0.158407	1.71375e-07	6.41927e-07	7528
BRCA	YY1	Central_memory	-0.0361036	0.236255	0.484535	7528
BRCA	YY1	Cytotoxic	-0.128144	2.4445e-05	0.000162963	7528
BRCA	YY1	DC	-0.0686897	0.0241127	0.0493301	7528
BRCA	YY1	Effector_memory	0.00279187	0.927049	0.958844	7528
BRCA	YY1	Exhausted	-0.14571	1.55369e-06	9.65785e-06	7528
BRCA	YY1	Gamma_delta	0.0415851	0.172453	0.273676	7528
BRCA	YY1	InfiltrationScore	-0.17107	1.58664e-08	4.89972e-07	7528
BRCA	YY1	MAIT	0.0602174	0.0480855	0.137007	7528
BRCA	YY1	Macrophage	0.00190213	0.95026	0.972511	7528
BRCA	YY1	Monocyte	-0.01803	0.554293	0.764234	7528
BRCA	YY1	NK	-0.109387	0.000320509	0.00109149	7528
BRCA	YY1	NKT	0.101455	0.000850491	0.00308627	7528
BRCA	YY1	Neutrophil	0.0506666	0.0963786	0.212167	7528
BRCA	YY1	Tfh	-0.0808289	0.00792812	0.0194916	7528
BRCA	YY1	Th1	-0.079789	0.00877122	0.0265096	7528
BRCA	YY1	Th17	0.214321	1.14874e-12	9.74702e-12	7528
BRCA	YY1	Th2	-0.0779863	0.0104237	0.0487366	7528
BRCA	YY1	Tr1	-0.0224977	0.460574	0.757265	7528
BRCA	YY1	iTreg	-0.142319	2.71558e-06	3.949e-05	7528
BRCA	YY1	nTreg	-0.0867547	0.00436533	0.0341531	7528
CESC	PEBP1	Bcell	-0.0446701	0.446998	0.732592	5037
CESC	PEBP1	CD4_T	0.0683314	0.244424	0.636443	5037
CESC	PEBP1	CD4_naive	0.0361308	0.538584	0.928077	5037
CESC	PEBP1	CD8_T	0.0901686	0.124214	0.367646	5037
CESC	PEBP1	CD8_naive	-0.0153504	0.793939	0.908875	5037
CESC	PEBP1	Central_memory	0.000618508	0.991603	0.997133	5037
CESC	PEBP1	Cytotoxic	0.142236	0.0149956	0.105875	5037
CESC	PEBP1	DC	0.0099575	0.86546	0.928095	5037
CESC	PEBP1	Effector_memory	-0.0187442	0.74976	0.987114	5037
CESC	PEBP1	Exhausted	0.131584	0.0245348	0.338632	5037
CESC	PEBP1	Gamma_delta	0.167784	0.00403771	0.141162	5037
CESC	PEBP1	InfiltrationScore	0.0596533	0.309683	0.620519	5037
CESC	PEBP1	MAIT	-0.16627	0.00438719	0.0610196	5037
CESC	PEBP1	Macrophage	0.00596196	0.9192	0.992396	5037
CESC	PEBP1	Monocyte	-0.0317661	0.588764	0.960036	5037
CESC	PEBP1	NK	0.107877	0.0656406	0.425313	5037
CESC	PEBP1	NKT	-0.0447498	0.446187	0.687104	5037
CESC	PEBP1	Neutrophil	-0.126349	0.0308929	0.172304	5037
CESC	PEBP1	Tfh	0.0406237	0.489261	0.746297	5037
CESC	PEBP1	Th1	0.134107	0.021897	0.309483	5037
CESC	PEBP1	Th17	-0.105868	0.0708564	0.391887	5037
CESC	PEBP1	Th2	0.144703	0.0133189	0.23411	5037
CESC	PEBP1	Tr1	0.00822152	0.888748	0.964833	5037
CESC	PEBP1	iTreg	0.0771603	0.18857	0.495404	5037
CESC	PEBP1	nTreg	0.0193911	0.741427	0.893002	5037
CESC	YY1	Bcell	0.0302322	0.606895	0.854902	7528
CESC	YY1	CD4_T	-0.00426753	0.942116	0.985798	7528
CESC	YY1	CD4_naive	0.160735	0.00590924	0.440193	7528
CESC	YY1	CD8_T	-0.189465	0.00114113	0.037672	7528
CESC	YY1	CD8_naive	0.171478	0.00328799	0.0394943	7528
CESC	YY1	Central_memory	-0.0237159	0.686524	0.978051	7528
CESC	YY1	Cytotoxic	-0.211542	0.000271997	0.0138835	7528
CESC	YY1	DC	0.0393445	0.503052	0.731792	7528
CESC	YY1	Effector_memory	0.0689391	0.240245	0.952624	7528
CESC	YY1	Exhausted	-0.216813	0.000188819	0.0286346	7528
CESC	YY1	Gamma_delta	-0.110503	0.0593005	0.331439	7528
CESC	YY1	InfiltrationScore	-0.102493	0.0803786	0.339095	7528
CESC	YY1	MAIT	0.0708379	0.227508	0.471636	7528
CESC	YY1	Macrophage	-0.0195192	0.73978	0.922382	7528
CESC	YY1	Monocyte	0.0421845	0.47271	0.919532	7528
CESC	YY1	NK	-0.170114	0.00354871	0.399921	7528
CESC	YY1	NKT	0.176316	0.00249712	0.0317703	7528
CESC	YY1	Neutrophil	0.127806	0.0289962	0.167965	7528
CESC	YY1	Tfh	-0.145289	0.0129461	0.119351	7528
CESC	YY1	Th1	-0.109389	0.0619248	0.380229	7528
CESC	YY1	Th17	-0.035753	0.542842	0.776344	7528
CESC	YY1	Th2	0.0221997	0.705603	0.877406	7528
CESC	YY1	Tr1	0.047105	0.422597	0.725338	7528
CESC	YY1	iTreg	-0.11786	0.0441801	0.25303	7528
CESC	YY1	nTreg	-0.14302	0.0144435	0.150436	7528
CHOL	PEBP1	Bcell	0.057986	0.736931	0.962937	5037
CHOL	PEBP1	CD4_T	-0.146217	0.394809	0.873534	5037
CHOL	PEBP1	CD4_naive	-0.0368473	0.831051	0.890605	5037
CHOL	PEBP1	CD8_T	0.133093	0.439033	0.969898	5037
CHOL	PEBP1	CD8_naive	0.0845053	0.624123	0.986588	5037
CHOL	PEBP1	Central_memory	-0.232174	0.173013	0.716049	5037
CHOL	PEBP1	Cytotoxic	0.10505	0.542031	0.962854	5037
CHOL	PEBP1	DC	-0.0899781	0.601756	0.97698	5037
CHOL	PEBP1	Effector_memory	0.0715434	0.678403	0.994954	5037
CHOL	PEBP1	Exhausted	0.050378	0.770451	0.983684	5037
CHOL	PEBP1	Gamma_delta	0.214059	0.20998	0.827591	5037
CHOL	PEBP1	InfiltrationScore	0.057971	0.736997	0.949203	5037
CHOL	PEBP1	MAIT	-0.0425957	0.805166	0.983403	5037
CHOL	PEBP1	Macrophage	-0.0472786	0.784228	0.958507	5037
CHOL	PEBP1	Monocyte	0.0823992	0.63282	0.98997	5037
CHOL	PEBP1	NK	0.160139	0.350838	0.920577	5037
CHOL	PEBP1	NKT	0.165989	0.333286	0.951872	5037
CHOL	PEBP1	Neutrophil	0.0458822	0.790457	0.994518	5037
CHOL	PEBP1	Tfh	-0.0702389	0.683961	0.998527	5037
CHOL	PEBP1	Th1	-0.0431534	0.802665	0.981216	5037
CHOL	PEBP1	Th17	-0.179078	0.296012	0.904424	5037
CHOL	PEBP1	Th2	0.0582399	0.73582	0.994212	5037
CHOL	PEBP1	Tr1	-0.123526	0.472908	0.923069	5037
CHOL	PEBP1	iTreg	-0.139038	0.418673	0.83075	5037
CHOL	PEBP1	nTreg	0.135412	0.431027	0.950772	5037
CHOL	YY1	Bcell	-0.0345827	0.841298	0.97068	7528
CHOL	YY1	CD4_T	0.0314332	0.855592	0.978251	7528
CHOL	YY1	CD4_naive	-0.202676	0.235824	0.547851	7528
CHOL	YY1	CD8_T	0.225628	0.185793	0.969898	7528
CHOL	YY1	CD8_naive	-0.0578374	0.737581	0.986588	7528
CHOL	YY1	Central_memory	0.164377	0.338066	0.716049	7528
CHOL	YY1	Cytotoxic	0.17054	0.320009	0.962854	7528
CHOL	YY1	DC	-0.17157	0.317051	0.97698	7528
CHOL	YY1	Effector_memory	-0.0108907	0.949735	0.994954	7528
CHOL	YY1	Exhausted	0.182636	0.286358	0.880692	7528
CHOL	YY1	Gamma_delta	0.112643	0.513053	0.998432	7528
CHOL	YY1	InfiltrationScore	-0.00502189	0.97681	0.990637	7528
CHOL	YY1	MAIT	-0.165862	0.333661	0.935703	7528
CHOL	YY1	Macrophage	0.0160958	0.925767	0.979474	7528
CHOL	YY1	Monocyte	-0.0859038	0.618375	0.98997	7528
CHOL	YY1	NK	0.105853	0.538929	0.949035	7528
CHOL	YY1	NKT	-0.0570308	0.741115	0.979199	7528
CHOL	YY1	Neutrophil	-0.231691	0.173935	0.937989	7528
CHOL	YY1	Tfh	0.132413	0.441396	0.998527	7528
CHOL	YY1	Th1	0.120904	0.482427	0.912635	7528
CHOL	YY1	Th17	0.00573047	0.973539	0.995447	7528
CHOL	YY1	Th2	-0.0961427	0.576986	0.994212	7528
CHOL	YY1	Tr1	0.234832	0.168008	0.633476	7528
CHOL	YY1	iTreg	0.283906	0.0933384	0.499712	7528
CHOL	YY1	nTreg	0.029942	0.862376	0.952559	7528
COAD	PEBP1	Bcell	-0.0475236	0.42581	0.744661	5037
COAD	PEBP1	CD4_T	-0.0199639	0.738083	0.848084	5037
COAD	PEBP1	CD4_naive	-0.0186615	0.754605	0.861887	5037
COAD	PEBP1	CD8_T	0.173564	0.00339907	0.0275765	5037
COAD	PEBP1	CD8_naive	-0.142085	0.0167657	0.0561745	5037
COAD	PEBP1	Central_memory	0.0757689	0.203794	0.771821	5037
COAD	PEBP1	Cytotoxic	0.1065	0.0736508	0.190361	5037
COAD	PEBP1	DC	0.075153	0.207504	0.448978	5037
COAD	PEBP1	Effector_memory	-0.0352052	0.555322	0.766567	5037
COAD	PEBP1	Exhausted	0.11482	0.0536795	0.179035	5037
COAD	PEBP1	Gamma_delta	-0.0917101	0.123751	0.579775	5037
COAD	PEBP1	InfiltrationScore	0.0922319	0.121619	0.597793	5037
COAD	PEBP1	MAIT	0.063974	0.283475	0.457703	5037
COAD	PEBP1	Macrophage	0.0486545	0.414869	0.801955	5037
COAD	PEBP1	Monocyte	-0.0308751	0.605	0.870863	5037
COAD	PEBP1	NK	0.0949918	0.110814	0.225151	5037
COAD	PEBP1	NKT	-0.0628569	0.291984	0.562277	5037
COAD	PEBP1	Neutrophil	-0.110155	0.0642376	0.213602	5037
COAD	PEBP1	Tfh	0.133069	0.0251801	0.26048	5037
COAD	PEBP1	Th1	0.100163	0.0926126	0.254651	5037
COAD	PEBP1	Th17	-0.025162	0.673402	0.935651	5037
COAD	PEBP1	Th2	0.0957698	0.107909	0.525241	5037
COAD	PEBP1	Tr1	0.00712251	0.905045	0.999809	5037
COAD	PEBP1	iTreg	0.101972	0.0868411	0.414293	5037
COAD	PEBP1	nTreg	0.151439	0.0107398	0.049183	5037
COAD	YY1	Bcell	-0.0745095	0.211433	0.593323	7528
COAD	YY1	CD4_T	-0.103714	0.081559	0.419828	7528
COAD	YY1	CD4_naive	-0.00260587	0.965189	0.990937	7528
COAD	YY1	CD8_T	0.0640201	0.283128	0.490163	7528
COAD	YY1	CD8_naive	0.0511399	0.391412	0.604441	7528
COAD	YY1	Central_memory	-0.0391384	0.511986	0.895485	7528
COAD	YY1	Cytotoxic	0.0592293	0.320781	0.5298	7528
COAD	YY1	DC	0.130302	0.0284034	0.18212	7528
COAD	YY1	Effector_memory	-0.0554821	0.352403	0.580159	7528
COAD	YY1	Exhausted	0.0278921	0.640334	0.805169	7528
COAD	YY1	Gamma_delta	-0.0971559	0.102882	0.504322	7528
COAD	YY1	InfiltrationScore	0.0588041	0.324274	0.726731	7528
COAD	YY1	MAIT	0.103363	0.0825999	0.271137	7528
COAD	YY1	Macrophage	0.078749	0.186517	0.59977	7528
COAD	YY1	Monocyte	-0.0904121	0.12918	0.514843	7528
COAD	YY1	NK	0.110631	0.0630886	0.161317	7528
COAD	YY1	NKT	0.00110281	0.985264	0.994722	7528
COAD	YY1	Neutrophil	-0.0889472	0.135526	0.339255	7528
COAD	YY1	Tfh	-0.052533	0.378622	0.770231	7528
COAD	YY1	Th1	0.0260528	0.66254	0.784948	7528
COAD	YY1	Th17	0.0484742	0.416602	0.793535	7528
COAD	YY1	Th2	0.140667	0.017899	0.214176	7528
COAD	YY1	Tr1	0.015934	0.789561	0.999809	7528
COAD	YY1	iTreg	-0.000966854	0.98708	0.993189	7528
COAD	YY1	nTreg	0.0272278	0.648318	0.753623	7528
DLBC	PEBP1	Bcell	-0.0759854	0.607735	0.966849	5037
DLBC	PEBP1	CD4_T	-0.00805555	0.956664	0.994004	5037
DLBC	PEBP1	CD4_naive	0.0762259	0.606597	0.976999	5037
DLBC	PEBP1	CD8_T	-0.0308451	0.835137	0.960337	5037
DLBC	PEBP1	CD8_naive	0.185867	0.20593	0.998923	5037
DLBC	PEBP1	Central_memory	0.0771096	0.602418	0.987693	5037
DLBC	PEBP1	Cytotoxic	-0.0151998	0.91833	0.992096	5037
DLBC	PEBP1	DC	-0.0390531	0.792138	0.966249	5037
DLBC	PEBP1	Effector_memory	-0.0220789	0.881591	0.993685	5037
DLBC	PEBP1	Exhausted	-0.201777	0.16904	0.588309	5037
DLBC	PEBP1	Gamma_delta	-0.00906421	0.951244	0.981675	5037
DLBC	PEBP1	InfiltrationScore	-0.133403	0.366034	0.785231	5037
DLBC	PEBP1	MAIT	-0.106394	0.471689	0.931022	5037
DLBC	PEBP1	Macrophage	-0.0561968	0.704406	0.96345	5037
DLBC	PEBP1	Monocyte	-0.021722	0.883491	0.974398	5037
DLBC	PEBP1	NK	-0.202472	0.167546	0.636552	5037
DLBC	PEBP1	NKT	-0.17433	0.235994	0.81852	5037
DLBC	PEBP1	Neutrophil	0.177105	0.228503	0.926748	5037
DLBC	PEBP1	Tfh	0.0838939	0.570773	0.904579	5037
DLBC	PEBP1	Th1	-0.073805	0.618105	0.903006	5037
DLBC	PEBP1	Th17	0.0096353	0.948176	0.994724	5037
DLBC	PEBP1	Th2	-0.13584	0.357262	0.882094	5037
DLBC	PEBP1	Tr1	-0.21493	0.142367	0.50524	5037
DLBC	PEBP1	iTreg	-0.0823231	0.578031	0.993551	5037
DLBC	PEBP1	nTreg	-0.0478551	0.746699	0.999897	5037
DLBC	YY1	Bcell	0.240386	0.0998107	0.728501	7528
DLBC	YY1	CD4_T	0.133103	0.36712	0.816401	7528
DLBC	YY1	CD4_naive	0.0658199	0.656699	0.976999	7528
DLBC	YY1	CD8_T	0.309308	0.0324174	0.600092	7528
DLBC	YY1	CD8_naive	0.00852983	0.954115	0.998923	7528
DLBC	YY1	Central_memory	-0.0257768	0.861937	0.987693	7528
DLBC	YY1	Cytotoxic	0.0138518	0.925552	0.992096	7528
DLBC	YY1	DC	-0.0646099	0.662628	0.958228	7528
DLBC	YY1	Effector_memory	-0.157804	0.284077	0.993685	7528
DLBC	YY1	Exhausted	0.202401	0.167698	0.588309	7528
DLBC	YY1	Gamma_delta	0.0434346	0.769423	0.918839	7528
DLBC	YY1	InfiltrationScore	0.0403563	0.785362	0.925436	7528
DLBC	YY1	MAIT	0.128093	0.38559	0.931022	7528
DLBC	YY1	Macrophage	-0.106241	0.47233	0.89163	7528
DLBC	YY1	Monocyte	-0.25711	0.077707	0.953275	7528
DLBC	YY1	NK	0.123964	0.401213	0.833675	7528
DLBC	YY1	NKT	-0.084401	0.568439	0.881518	7528
DLBC	YY1	Neutrophil	-0.33604	0.0195358	0.926748	7528
DLBC	YY1	Tfh	0.262271	0.0717277	0.754138	7528
DLBC	YY1	Th1	0.124375	0.399643	0.864176	7528
DLBC	YY1	Th17	-0.287131	0.0478445	0.738891	7528
DLBC	YY1	Th2	0.208856	0.154266	0.635746	7528
DLBC	YY1	Tr1	0.122272	0.407722	0.70213	7528
DLBC	YY1	iTreg	0.0779295	0.598554	0.993551	7528
DLBC	YY1	nTreg	0.224519	0.124987	0.999897	7528
ESCA	PEBP1	Bcell	-0.0562203	0.449697	0.69191	5037
ESCA	PEBP1	CD4_T	-0.0799854	0.281778	0.615906	5037
ESCA	PEBP1	CD4_naive	-0.117878	0.112006	0.497959	5037
ESCA	PEBP1	CD8_T	-0.00192611	0.979355	0.991987	5037
ESCA	PEBP1	CD8_naive	-0.0212716	0.775018	0.940049	5037
ESCA	PEBP1	Central_memory	-0.157639	0.0330697	0.215013	5037
ESCA	PEBP1	Cytotoxic	0.0537391	0.469981	0.696435	5037
ESCA	PEBP1	DC	0.147925	0.0456751	0.150184	5037
ESCA	PEBP1	Effector_memory	-0.0622553	0.402471	0.920756	5037
ESCA	PEBP1	Exhausted	0.0883492	0.23432	0.593499	5037
ESCA	PEBP1	Gamma_delta	0.060972	0.412259	0.743687	5037
ESCA	PEBP1	InfiltrationScore	0.147685	0.046031	0.388669	5037
ESCA	PEBP1	MAIT	-0.0638105	0.390797	0.643905	5037
ESCA	PEBP1	Macrophage	0.135785	0.0668365	0.299758	5037
ESCA	PEBP1	Monocyte	0.000450444	0.995171	0.996839	5037
ESCA	PEBP1	NK	0.144112	0.0516156	0.26248	5037
ESCA	PEBP1	NKT	-0.05973	0.421863	0.986132	5037
ESCA	PEBP1	Neutrophil	-0.0781796	0.292819	0.536578	5037
ESCA	PEBP1	Tfh	-0.085683	0.248796	0.674164	5037
ESCA	PEBP1	Th1	0.0127523	0.863961	0.975376	5037
ESCA	PEBP1	Th17	-0.0823104	0.26798	0.661583	5037
ESCA	PEBP1	Th2	0.0463461	0.533286	0.750801	5037
ESCA	PEBP1	Tr1	-0.0806968	0.277507	0.736659	5037
ESCA	PEBP1	iTreg	0.0429424	0.563804	0.907216	5037
ESCA	PEBP1	nTreg	-0.0307686	0.679258	0.816593	5037
ESCA	YY1	Bcell	-0.149371	0.043576	0.218684	7528
ESCA	YY1	CD4_T	-0.0953552	0.199131	0.52663	7528
ESCA	YY1	CD4_naive	0.096119	0.19554	0.497959	7528
ESCA	YY1	CD8_T	-0.190972	0.00960887	0.378941	7528
ESCA	YY1	CD8_naive	0.0988429	0.183116	0.720842	7528
ESCA	YY1	Central_memory	-0.125667	0.090061	0.352423	7528
ESCA	YY1	Cytotoxic	-0.00500578	0.94638	0.976749	7528
ESCA	YY1	DC	0.283999	9.7766e-05	0.00631327	7528
ESCA	YY1	Effector_memory	-0.0568842	0.444354	0.939031	7528
ESCA	YY1	Exhausted	0.0181177	0.80767	0.942317	7528
ESCA	YY1	Gamma_delta	-0.032451	0.662767	0.885086	7528
ESCA	YY1	InfiltrationScore	0.11625	0.117081	0.551647	7528
ESCA	YY1	MAIT	-0.117245	0.113958	0.373032	7528
ESCA	YY1	Macrophage	0.219761	0.00279775	0.15146	7528
ESCA	YY1	Monocyte	0.0880984	0.235656	0.670464	7528
ESCA	YY1	NK	0.00228086	0.975554	0.994407	7528
ESCA	YY1	NKT	0.0411795	0.579932	0.986132	7528
ESCA	YY1	Neutrophil	-0.0598934	0.420592	0.636003	7528
ESCA	YY1	Tfh	-0.189955	0.0100081	0.111609	7528
ESCA	YY1	Th1	0.0339622	0.648091	0.900503	7528
ESCA	YY1	Th17	-0.0530463	0.475733	0.786394	7528
ESCA	YY1	Th2	0.0379099	0.610399	0.797604	7528
ESCA	YY1	Tr1	0.0070246	0.92481	0.972798	7528
ESCA	YY1	iTreg	-0.0406209	0.585086	0.921682	7528
ESCA	YY1	nTreg	-0.228484	0.00186487	0.01293	7528
GBM	PEBP1	Bcell	-0.103631	0.21163	0.521189	5037
GBM	PEBP1	CD4_T	0.0315948	0.704026	0.962209	5037
GBM	PEBP1	CD4_naive	0.0144538	0.862057	0.998706	5037
GBM	PEBP1	CD8_T	0.117738	0.155534	0.733286	5037
GBM	PEBP1	CD8_naive	0.0410162	0.62183	0.949306	5037
GBM	PEBP1	Central_memory	-0.0379964	0.647733	0.853732	5037
GBM	PEBP1	Cytotoxic	0.017829	0.830284	0.999483	5037
GBM	PEBP1	DC	-0.0378292	0.64918	0.861235	5037
GBM	PEBP1	Effector_memory	-0.0319852	0.700542	0.992498	5037
GBM	PEBP1	Exhausted	0.0906826	0.274686	0.759295	5037
GBM	PEBP1	Gamma_delta	-0.0503043	0.545123	0.991945	5037
GBM	PEBP1	InfiltrationScore	0.0597202	0.472431	0.822779	5037
GBM	PEBP1	MAIT	0.091557	0.270066	0.627574	5037
GBM	PEBP1	Macrophage	0.0411033	0.621091	0.856706	5037
GBM	PEBP1	Monocyte	0.0249699	0.76402	0.994578	5037
GBM	PEBP1	NK	0.0367536	0.658519	0.996709	5037
GBM	PEBP1	NKT	0.0520445	0.531286	0.788796	5037
GBM	PEBP1	Neutrophil	-0.0085436	0.918199	0.968354	5037
GBM	PEBP1	Tfh	0.0431927	0.603443	0.999733	5037
GBM	PEBP1	Th1	0.033802	0.684416	0.955445	5037
GBM	PEBP1	Th17	0.0673822	0.417415	0.96625	5037
GBM	PEBP1	Th2	0.0866958	0.296428	0.847037	5037
GBM	PEBP1	Tr1	-0.115469	0.16371	0.554653	5037
GBM	PEBP1	iTreg	-0.0956888	0.248948	0.587234	5037
GBM	PEBP1	nTreg	-0.0352522	0.671644	0.989943	5037
GBM	YY1	Bcell	0.162544	0.0491806	0.283495	7528
GBM	YY1	CD4_T	-0.0407236	0.624321	0.96074	7528
GBM	YY1	CD4_naive	-0.082048	0.323175	0.998706	7528
GBM	YY1	CD8_T	-0.162997	0.0485441	0.529246	7528
GBM	YY1	CD8_naive	0.0670917	0.41943	0.824671	7528
GBM	YY1	Central_memory	-0.0926706	0.264258	0.632365	7528
GBM	YY1	Cytotoxic	-0.115583	0.163292	0.673373	7528
GBM	YY1	DC	-0.122747	0.138573	0.520577	7528
GBM	YY1	Effector_memory	-0.03607	0.664482	0.992498	7528
GBM	YY1	Exhausted	-0.0162412	0.8452	0.952841	7528
GBM	YY1	Gamma_delta	0.0208137	0.802413	0.999458	7528
GBM	YY1	InfiltrationScore	-0.068561	0.409296	0.780779	7528
GBM	YY1	MAIT	-0.0428556	0.606275	0.784757	7528
GBM	YY1	Macrophage	-0.0635865	0.444189	0.774106	7528
GBM	YY1	Monocyte	0.0203895	0.80636	0.994578	7528
GBM	YY1	NK	-0.0503291	0.544925	0.981425	7528
GBM	YY1	NKT	0.0469145	0.572575	0.820092	7528
GBM	YY1	Neutrophil	0.223339	0.00654478	0.0751207	7528
GBM	YY1	Tfh	-0.0326626	0.694513	0.999733	7528
GBM	YY1	Th1	-0.0967961	0.243488	0.847357	7528
GBM	YY1	Th17	0.0211375	0.799404	0.96625	7528
GBM	YY1	Th2	-0.259169	0.00152562	0.17383	7528
GBM	YY1	Tr1	-0.0058889	0.943565	0.997585	7528
GBM	YY1	iTreg	-0.0837372	0.313279	0.651222	7528
GBM	YY1	nTreg	0.00572083	0.945173	0.998818	7528
HNSC	PEBP1	Bcell	-0.00185146	0.9666	0.977933	5037
HNSC	PEBP1	CD4_T	0.0652299	0.139719	0.296199	5037
HNSC	PEBP1	CD4_naive	-0.0433191	0.326997	0.677363	5037
HNSC	PEBP1	CD8_T	0.115966	0.00849811	0.019907	5037
HNSC	PEBP1	CD8_naive	-0.0455911	0.302239	0.398427	5037
HNSC	PEBP1	Central_memory	0.0219612	0.619371	0.832281	5037
HNSC	PEBP1	Cytotoxic	0.112984	0.0103623	0.0195291	5037
HNSC	PEBP1	DC	-0.0475945	0.281469	0.534463	5037
HNSC	PEBP1	Effector_memory	0.0233715	0.597048	0.768355	5037
HNSC	PEBP1	Exhausted	0.0636576	0.149538	0.241614	5037
HNSC	PEBP1	Gamma_delta	0.111401	0.0114926	0.0307452	5037
HNSC	PEBP1	InfiltrationScore	0.0341316	0.440021	0.651247	5037
HNSC	PEBP1	MAIT	-0.0562217	0.203182	0.4503	5037
HNSC	PEBP1	Macrophage	-0.0049579	0.91072	0.987909	5037
HNSC	PEBP1	Monocyte	-0.122116	0.00556769	0.0256944	5037
HNSC	PEBP1	NK	0.102092	0.0206124	0.0541349	5037
HNSC	PEBP1	NKT	-0.0544562	0.217756	0.319243	5037
HNSC	PEBP1	Neutrophil	-0.0877932	0.0466563	0.105748	5037
HNSC	PEBP1	Tfh	0.040061	0.364725	0.474124	5037
HNSC	PEBP1	Th1	0.0949744	0.0313308	0.0635686	5037
HNSC	PEBP1	Th17	-0.0930693	0.0349039	0.105583	5037
HNSC	PEBP1	Th2	0.0550035	0.213161	0.396367	5037
HNSC	PEBP1	Tr1	0.0285605	0.518237	0.750067	5037
HNSC	PEBP1	iTreg	0.0688046	0.119244	0.290315	5037
HNSC	PEBP1	nTreg	-0.0178599	0.686243	0.826621	5037
HNSC	YY1	Bcell	-0.165319	0.000166644	0.00276821	7528
HNSC	YY1	CD4_T	-0.183602	2.8134e-05	0.000540934	7528
HNSC	YY1	CD4_naive	0.00501108	0.909766	0.983589	7528
HNSC	YY1	CD8_T	-0.134674	0.00221499	0.00700859	7528
HNSC	YY1	CD8_naive	0.163732	0.000192844	0.00133604	7528
HNSC	YY1	Central_memory	-0.142933	0.00115683	0.0111888	7528
HNSC	YY1	Cytotoxic	-0.208375	1.88768e-06	1.1646e-05	7528
HNSC	YY1	DC	0.0754573	0.0874496	0.329378	7528
HNSC	YY1	Effector_memory	0.0169064	0.702172	0.843284	7528
HNSC	YY1	Exhausted	-0.110244	0.0123863	0.0356735	7528
HNSC	YY1	Gamma_delta	-0.234384	7.61667e-08	1.2866e-06	7528
HNSC	YY1	InfiltrationScore	-0.111354	0.0115275	0.0490435	7528
HNSC	YY1	MAIT	0.130943	0.00293692	0.0318327	7528
HNSC	YY1	Macrophage	-0.0375829	0.395165	0.762301	7528
HNSC	YY1	Monocyte	0.0704929	0.110426	0.203421	7528
HNSC	YY1	NK	-0.0919344	0.0371933	0.085447	7528
HNSC	YY1	NKT	0.244771	1.89235e-08	6.53283e-07	7528
HNSC	YY1	Neutrophil	0.166277	0.000152493	0.000760821	7528
HNSC	YY1	Tfh	-0.271304	4.01169e-10	4.51754e-09	7528
HNSC	YY1	Th1	-0.0264208	0.550076	0.654253	7528
HNSC	YY1	Th17	0.109975	0.0126025	0.0508009	7528
HNSC	YY1	Th2	-0.0819077	0.0635142	0.200667	7528
HNSC	YY1	Tr1	-0.163182	0.000202783	0.00748066	7528
HNSC	YY1	iTreg	-0.0718762	0.103592	0.266704	7528
HNSC	YY1	nTreg	-0.0681704	0.122694	0.346261	7528
KICH	PEBP1	Bcell	0.0773801	0.536869	0.804716	5037
KICH	PEBP1	CD4_T	-0.0565104	0.652219	0.952739	5037
KICH	PEBP1	CD4_naive	-0.0193678	0.877331	0.988843	5037
KICH	PEBP1	CD8_T	0.11984	0.337838	0.428194	5037
KICH	PEBP1	CD8_naive	0.111554	0.372533	0.594533	5037
KICH	PEBP1	Central_memory	0.0536128	0.668987	0.971195	5037
KICH	PEBP1	Cytotoxic	-0.0251538	0.841107	0.95101	5037
KICH	PEBP1	DC	-0.155054	0.213819	0.883582	5037
KICH	PEBP1	Effector_memory	0.00702099	0.955382	0.998143	5037
KICH	PEBP1	Exhausted	-0.119854	0.337782	0.690207	5037
KICH	PEBP1	Gamma_delta	0.207997	0.0937627	0.264745	5037
KICH	PEBP1	InfiltrationScore	-0.127197	0.308798	0.539586	5037
KICH	PEBP1	MAIT	-0.0160389	0.898292	0.963795	5037
KICH	PEBP1	Macrophage	-0.253506	0.039993	0.114174	5037
KICH	PEBP1	Monocyte	-0.196456	0.113885	0.841778	5037
KICH	PEBP1	NK	0.0737481	0.556205	0.719597	5037
KICH	PEBP1	NKT	-0.000210977	0.998659	0.998788	5037
KICH	PEBP1	Neutrophil	0.0682886	0.58588	0.999387	5037
KICH	PEBP1	Tfh	0.0915394	0.464781	0.56388	5037
KICH	PEBP1	Th1	-0.115473	0.355865	0.687421	5037
KICH	PEBP1	Th17	-0.100383	0.422573	0.872608	5037
KICH	PEBP1	Th2	0.128496	0.303841	0.567763	5037
KICH	PEBP1	Tr1	-0.0709534	0.571306	0.995787	5037
KICH	PEBP1	iTreg	-0.0903898	0.470431	0.711947	5037
KICH	PEBP1	nTreg	-0.134282	0.282398	0.770026	5037
KICH	YY1	Bcell	0.162871	0.191336	0.431304	7528
KICH	YY1	CD4_T	0.0980853	0.433324	0.836664	7528
KICH	YY1	CD4_naive	0.053703	0.668463	0.960239	7528
KICH	YY1	CD8_T	0.173402	0.163806	0.313513	7528
KICH	YY1	CD8_naive	0.0896356	0.474157	0.659763	7528
KICH	YY1	Central_memory	0.117847	0.345992	0.971195	7528
KICH	YY1	Cytotoxic	0.00250561	0.98407	0.989713	7528
KICH	YY1	DC	-0.249481	0.0433699	0.723119	7528
KICH	YY1	Effector_memory	0.09525	0.446799	0.921497	7528
KICH	YY1	Exhausted	-0.0566329	0.651514	0.876798	7528
KICH	YY1	Gamma_delta	0.165375	0.184509	0.409057	7528
KICH	YY1	InfiltrationScore	-0.173447	0.163695	0.333293	7528
KICH	YY1	MAIT	-0.0129358	0.917894	0.966827	7528
KICH	YY1	Macrophage	-0.326266	0.00750556	0.0693272	7528
KICH	YY1	Monocyte	-0.30659	0.0122875	0.679036	7528
KICH	YY1	NK	0.0739356	0.555199	0.719597	7528
KICH	YY1	NKT	0.0552994	0.659207	0.806843	7528
KICH	YY1	Neutrophil	0.0154932	0.901735	0.999387	7528
KICH	YY1	Tfh	0.189733	0.127048	0.23951	7528
KICH	YY1	Th1	0.0140535	0.910827	0.97279	7528
KICH	YY1	Th17	-0.153179	0.219477	0.748461	7528
KICH	YY1	Th2	0.0509356	0.684625	0.834033	7528
KICH	YY1	Tr1	-0.0342916	0.784589	0.995787	7528
KICH	YY1	iTreg	0.00282981	0.982009	0.99105	7528
KICH	YY1	nTreg	-0.0141494	0.910221	0.997443	7528
KIRC	PEBP1	Bcell	-0.0610727	0.162317	0.539426	5037
KIRC	PEBP1	CD4_T	-0.0593606	0.174439	0.347839	5037
KIRC	PEBP1	CD4_naive	-0.00219365	0.960008	0.98338	5037
KIRC	PEBP1	CD8_T	0.0832438	0.056635	0.122419	5037
KIRC	PEBP1	CD8_naive	0.121991	0.00512674	0.0374546	5037
KIRC	PEBP1	Central_memory	-0.0579762	0.184723	0.635622	5037
KIRC	PEBP1	Cytotoxic	-0.0719555	0.0995758	0.327856	5037
KIRC	PEBP1	DC	0.0833273	0.0563864	0.246026	5037
KIRC	PEBP1	Effector_memory	0.0149092	0.73324	0.921468	5037
KIRC	PEBP1	Exhausted	0.0545978	0.211686	0.393025	5037
KIRC	PEBP1	Gamma_delta	-0.217014	5.15327e-07	7.00324e-06	5037
KIRC	PEBP1	InfiltrationScore	0.0934279	0.0323319	0.120716	5037
KIRC	PEBP1	MAIT	0.0792139	0.0697482	0.191851	5037
KIRC	PEBP1	Macrophage	0.15767	0.000286992	0.00256101	5037
KIRC	PEBP1	Monocyte	0.0735906	0.0920972	0.253445	5037
KIRC	PEBP1	NK	-0.0771797	0.0772568	0.261835	5037
KIRC	PEBP1	NKT	-0.119195	0.00625059	0.0521563	5037
KIRC	PEBP1	Neutrophil	-0.0464334	0.288254	0.36104	5037
KIRC	PEBP1	Tfh	-0.0507305	0.245903	0.616771	5037
KIRC	PEBP1	Th1	0.00340351	0.937988	0.967952	5037
KIRC	PEBP1	Th17	0.0667324	0.126739	0.286312	5037
KIRC	PEBP1	Th2	-0.133729	0.00213612	0.0126042	5037
KIRC	PEBP1	Tr1	0.0846398	0.0525992	0.203246	5037
KIRC	PEBP1	iTreg	0.191594	9.84571e-06	0.000118672	5037
KIRC	PEBP1	nTreg	0.253403	3.89143e-09	8.84172e-08	5037
KIRC	YY1	Bcell	0.100633	0.0211017	0.326349	7528
KIRC	YY1	CD4_T	0.0658102	0.132083	0.292988	7528
KIRC	YY1	CD4_naive	0.150019	0.000563261	0.0124315	7528
KIRC	YY1	CD8_T	-0.238504	3.16916e-08	1.49639e-06	7528
KIRC	YY1	CD8_naive	0.127276	0.00348697	0.0343939	7528
KIRC	YY1	Central_memory	-0.123117	0.00472799	0.119573	7528
KIRC	YY1	Cytotoxic	0.045835	0.294519	0.55124	7528
KIRC	YY1	DC	-0.198921	4.36998e-06	0.000696689	7528
KIRC	YY1	Effector_memory	-0.126788	0.00361537	0.0749315	7528
KIRC	YY1	Exhausted	-0.282277	4.49448e-11	1.05502e-08	7528
KIRC	YY1	Gamma_delta	0.0761571	0.0812722	0.20415	7528
KIRC	YY1	InfiltrationScore	-0.267604	4.63591e-10	4.27206e-08	7528
KIRC	YY1	MAIT	-0.0158426	0.717235	0.816728	7528
KIRC	YY1	Macrophage	-0.275395	1.36643e-10	1.95095e-08	7528
KIRC	YY1	Monocyte	-0.139968	0.00130328	0.0726519	7528
KIRC	YY1	NK	0.0914733	0.0361431	0.206061	7528
KIRC	YY1	NKT	0.117878	0.00685281	0.0542943	7528
KIRC	YY1	Neutrophil	0.163514	0.000167887	0.00420044	7528
KIRC	YY1	Tfh	-0.00353595	0.93558	0.971464	7528
KIRC	YY1	Th1	-0.168223	0.000107539	0.00176099	7528
KIRC	YY1	Th17	0.123001	0.00476777	0.0498497	7528
KIRC	YY1	Th2	0.087748	0.0444688	0.136336	7528
KIRC	YY1	Tr1	-0.133255	0.00221609	0.0554741	7528
KIRC	YY1	iTreg	-0.209204	1.32708e-06	3.1011e-05	7528
KIRC	YY1	nTreg	-0.220513	3.33431e-07	5.7255e-06	7528
KIRP	PEBP1	Bcell	0.0306276	0.604717	0.813819	5037
KIRP	PEBP1	CD4_T	0.0355447	0.547987	0.670109	5037
KIRP	PEBP1	CD4_naive	-0.150395	0.0105964	0.319008	5037
KIRP	PEBP1	CD8_T	0.113341	0.0546958	0.173689	5037
KIRP	PEBP1	CD8_naive	-0.038705	0.512961	0.710993	5037
KIRP	PEBP1	Central_memory	0.089329	0.130433	0.438881	5037
KIRP	PEBP1	Cytotoxic	0.102841	0.0814561	0.178558	5037
KIRP	PEBP1	DC	0.0781044	0.186258	0.435386	5037
KIRP	PEBP1	Effector_memory	0.0382549	0.517877	0.840325	5037
KIRP	PEBP1	Exhausted	-0.00919686	0.876506	0.947231	5037
KIRP	PEBP1	Gamma_delta	0.196558	0.000796585	0.00338571	5037
KIRP	PEBP1	InfiltrationScore	0.100937	0.0872896	0.428308	5037
KIRP	PEBP1	MAIT	0.0508839	0.389607	0.516928	5037
KIRP	PEBP1	Macrophage	0.0597133	0.312561	0.671959	5037
KIRP	PEBP1	Monocyte	0.114929	0.0513685	0.14524	5037
KIRP	PEBP1	NK	0.0764879	0.195564	0.350216	5037
KIRP	PEBP1	NKT	0.0497478	0.400293	0.706437	5037
KIRP	PEBP1	Neutrophil	-0.123321	0.0364634	0.101614	5037
KIRP	PEBP1	Tfh	0.0955564	0.105598	0.29484	5037
KIRP	PEBP1	Th1	0.097599	0.0983196	0.202253	5037
KIRP	PEBP1	Th17	-0.131335	0.0258273	0.24001	5037
KIRP	PEBP1	Th2	0.276209	1.93639e-06	3.9254e-05	5037
KIRP	PEBP1	Tr1	-0.0844961	0.15264	0.40437	5037
KIRP	PEBP1	iTreg	-0.0802328	0.174507	0.28173	5037
KIRP	PEBP1	nTreg	-0.08078	0.171577	0.275672	5037
KIRP	YY1	Bcell	-0.0962646	0.103028	0.595364	7528
KIRP	YY1	CD4_T	-0.0368274	0.53363	0.663595	7528
KIRP	YY1	CD4_naive	0.0350784	0.553253	0.90331	7528
KIRP	YY1	CD8_T	-0.110305	0.0615515	0.181154	7528
KIRP	YY1	CD8_naive	-0.049714	0.400614	0.623357	7528
KIRP	YY1	Central_memory	0.0139108	0.814163	0.930318	7528
KIRP	YY1	Cytotoxic	-0.0665973	0.259941	0.383471	7528
KIRP	YY1	DC	0.0667138	0.259107	0.536203	7528
KIRP	YY1	Effector_memory	0.0804059	0.173576	0.840325	7528
KIRP	YY1	Exhausted	-0.0737173	0.212295	0.647281	7528
KIRP	YY1	Gamma_delta	-0.0747387	0.206011	0.273789	7528
KIRP	YY1	InfiltrationScore	-0.00848626	0.88598	0.991588	7528
KIRP	YY1	MAIT	-0.0136112	0.818094	0.889133	7528
KIRP	YY1	Macrophage	0.0719145	0.223719	0.590142	7528
KIRP	YY1	Monocyte	-0.0585226	0.322325	0.529761	7528
KIRP	YY1	NK	-0.0779749	0.186991	0.337109	7528
KIRP	YY1	NKT	0.0971762	0.0997927	0.611338	7528
KIRP	YY1	Neutrophil	0.0132871	0.822354	0.869958	7528
KIRP	YY1	Tfh	-0.0182749	0.757464	0.818507	7528
KIRP	YY1	Th1	0.0197731	0.738279	0.83963	7528
KIRP	YY1	Th17	0.134143	0.0227929	0.219202	7528
KIRP	YY1	Th2	-0.160532	0.0063296	0.0866293	7528
KIRP	YY1	Tr1	-0.0488061	0.409283	0.688998	7528
KIRP	YY1	iTreg	-0.00270879	0.963494	0.974362	7528
KIRP	YY1	nTreg	0.0365952	0.536215	0.625291	7528
LAML	PEBP1	Bcell	0.0475229	0.559668	0.968367	5037
LAML	PEBP1	CD4_T	-0.0607336	0.455812	0.845594	5037
LAML	PEBP1	CD4_naive	0.094622	0.244658	0.838114	5037
LAML	PEBP1	CD8_T	-0.00428686	0.958058	0.99435	5037
LAML	PEBP1	CD8_naive	-0.0490523	0.547087	0.997404	5037
LAML	PEBP1	Central_memory	-0.100569	0.21612	0.818355	5037
LAML	PEBP1	Cytotoxic	0.0176952	0.828131	0.979263	5037
LAML	PEBP1	DC	0.0101165	0.901227	0.967774	5037
LAML	PEBP1	Effector_memory	-0.0350793	0.666846	0.995679	5037
LAML	PEBP1	Exhausted	0.0347765	0.669552	0.780857	5037
LAML	PEBP1	Gamma_delta	-0.106393	0.190557	0.553879	5037
LAML	PEBP1	InfiltrationScore	0.054423	0.504038	0.846516	5037
LAML	PEBP1	MAIT	0.0101049	0.90134	0.999795	5037
LAML	PEBP1	Macrophage	0.0411738	0.613328	0.825455	5037
LAML	PEBP1	Monocyte	0.0694955	0.39333	0.636925	5037
LAML	PEBP1	NK	-0.0524025	0.520023	0.686838	5037
LAML	PEBP1	NKT	0.126062	0.12049	0.944671	5037
LAML	PEBP1	Neutrophil	0.0560786	0.491133	0.988749	5037
LAML	PEBP1	Tfh	0.0187548	0.818012	0.934554	5037
LAML	PEBP1	Th1	-0.0291747	0.720353	0.998596	5037
LAML	PEBP1	Th17	-0.016134	0.843089	0.965311	5037
LAML	PEBP1	Th2	-0.15509	0.0555912	0.925687	5037
LAML	PEBP1	Tr1	-0.0527825	0.516997	0.918657	5037
LAML	PEBP1	iTreg	-0.002596	0.974594	0.994072	5037
LAML	PEBP1	nTreg	-0.123949	0.126889	0.765706	5037
LAML	YY1	Bcell	0.0479625	0.556038	0.966927	7528
LAML	YY1	CD4_T	0.105042	0.196282	0.641952	7528
LAML	YY1	CD4_naive	0.0034001	0.966728	0.999818	7528
LAML	YY1	CD8_T	0.000257166	0.997483	0.998529	7528
LAML	YY1	CD8_naive	-0.0891849	0.272949	0.997404	7528
LAML	YY1	Central_memory	0.0123038	0.880018	0.994054	7528
LAML	YY1	Cytotoxic	0.0539152	0.508031	0.933536	7528
LAML	YY1	DC	-0.0615021	0.450119	0.804577	7528
LAML	YY1	Effector_memory	0.0198115	0.807952	0.995679	7528
LAML	YY1	Exhausted	-0.109974	0.175975	0.374884	7528
LAML	YY1	Gamma_delta	0.0256923	0.752578	0.893223	7528
LAML	YY1	InfiltrationScore	-0.0141524	0.862157	0.952776	7528
LAML	YY1	MAIT	-0.0142038	0.861662	0.999795	7528
LAML	YY1	Macrophage	-0.0309582	0.704032	0.859873	7528
LAML	YY1	Monocyte	-0.032558	0.689507	0.806589	7528
LAML	YY1	NK	0.103696	0.202106	0.496466	7528
LAML	YY1	NKT	-0.0554369	0.496114	0.952174	7528
LAML	YY1	Neutrophil	-0.0745287	0.359886	0.858131	7528
LAML	YY1	Tfh	0.0919695	0.258194	0.724625	7528
LAML	YY1	Th1	0.0807527	0.321058	0.998596	7528
LAML	YY1	Th17	0.0630161	0.439024	0.870219	7528
LAML	YY1	Th2	0.0597444	0.463197	0.925687	7528
LAML	YY1	Tr1	0.0276094	0.73478	0.963147	7528
LAML	YY1	iTreg	0.117258	0.14888	0.678727	7528
LAML	YY1	nTreg	0.180204	0.0258138	0.42924	7528
LGG	PEBP1	Bcell	-0.0203226	0.646075	0.7993	5037
LGG	PEBP1	CD4_T	-0.0256281	0.562493	0.700995	5037
LGG	PEBP1	CD4_naive	0.0141	0.750033	0.930058	5037
LGG	PEBP1	CD8_T	0.0681209	0.123334	0.235204	5037
LGG	PEBP1	CD8_naive	0.0755055	0.0875568	0.131762	5037
LGG	PEBP1	Central_memory	0.190581	1.3869e-05	4.5105e-05	5037
LGG	PEBP1	Cytotoxic	-0.0121833	0.783099	0.86815	5037
LGG	PEBP1	DC	-0.0840169	0.0572153	0.103064	5037
LGG	PEBP1	Effector_memory	-0.0799616	0.0703624	0.113432	5037
LGG	PEBP1	Exhausted	-0.181328	3.6079e-05	0.000107914	5037
LGG	PEBP1	Gamma_delta	0.0341368	0.440399	0.642839	5037
LGG	PEBP1	InfiltrationScore	-0.166831	0.000147013	0.000330876	5037
LGG	PEBP1	MAIT	0.0338588	0.444132	0.532738	5037
LGG	PEBP1	Macrophage	-0.149009	0.000710044	0.00125121	5037
LGG	PEBP1	Monocyte	-0.108084	0.0143153	0.0283754	5037
LGG	PEBP1	NK	-0.0914054	0.0384926	0.107399	5037
LGG	PEBP1	NKT	-0.0934552	0.0343292	0.182786	5037
LGG	PEBP1	Neutrophil	0.0069045	0.87603	0.945454	5037
LGG	PEBP1	Tfh	0.0109028	0.805413	0.96267	5037
LGG	PEBP1	Th1	-0.061633	0.163355	0.30825	5037
LGG	PEBP1	Th17	-0.00303952	0.945248	0.994772	5037
LGG	PEBP1	Th2	-0.0338132	0.444746	0.633708	5037
LGG	PEBP1	Tr1	0.0797463	0.0711244	0.272697	5037
LGG	PEBP1	iTreg	0.0109016	0.805434	0.940931	5037
LGG	PEBP1	nTreg	0.127563	0.00380354	0.052387	5037
LGG	YY1	Bcell	0.0303186	0.493228	0.697972	7528
LGG	YY1	CD4_T	-0.100543	0.0227585	0.102753	7528
LGG	YY1	CD4_naive	-0.024896	0.573712	0.873395	7528
LGG	YY1	CD8_T	0.019005	0.667602	0.753897	7528
LGG	YY1	CD8_naive	0.123187	0.00520651	0.0126406	7528
LGG	YY1	Central_memory	0.232219	1.03938e-07	5.58959e-07	7528
LGG	YY1	Cytotoxic	-0.0994895	0.0242286	0.0859899	7528
LGG	YY1	DC	-0.114591	0.00938644	0.029839	7528
LGG	YY1	Effector_memory	-0.169396	0.000115602	0.000620821	7528
LGG	YY1	Exhausted	-0.16221	0.00022472	0.000533106	7528
LGG	YY1	Gamma_delta	-0.0684071	0.121762	0.287687	7528
LGG	YY1	InfiltrationScore	-0.230516	1.29456e-07	6.05525e-07	7528
LGG	YY1	MAIT	-0.0369376	0.403796	0.496217	7528
LGG	YY1	Macrophage	-0.216584	7.32809e-07	2.39e-06	7528
LGG	YY1	Monocyte	-0.0719673	0.103491	0.150854	7528
LGG	YY1	NK	-0.0988865	0.0251066	0.0793003	7528
LGG	YY1	NKT	0.0466888	0.291208	0.542481	7528
LGG	YY1	Neutrophil	0.0451342	0.307589	0.59183	7528
LGG	YY1	Tfh	-0.0728626	0.0992566	0.366505	7528
LGG	YY1	Th1	-0.143886	0.00108303	0.0035218	7528
LGG	YY1	Th17	0.043467	0.32582	0.756497	7528
LGG	YY1	Th2	-0.13665	0.00192168	0.00921213	7528
LGG	YY1	Tr1	0.0674478	0.127092	0.376298	7528
LGG	YY1	iTreg	-0.102195	0.020608	0.434994	7528
LGG	YY1	nTreg	-0.0741207	0.0935406	0.311689	7528
LIHC	PEBP1	Bcell	0.0917982	0.080279	0.174451	5037
LIHC	PEBP1	CD4_T	0.00656213	0.900707	0.930351	5037
LIHC	PEBP1	CD4_naive	-0.0977221	0.0625375	0.310074	5037
LIHC	PEBP1	CD8_T	0.118235	0.024074	0.163721	5037
LIHC	PEBP1	CD8_naive	-0.035267	0.502382	0.77437	5037
LIHC	PEBP1	Central_memory	0.0275102	0.600866	0.830478	5037
LIHC	PEBP1	Cytotoxic	0.0645556	0.219189	0.464909	5037
LIHC	PEBP1	DC	0.112603	0.0317316	0.145828	5037
LIHC	PEBP1	Effector_memory	0.0411278	0.434038	0.629471	5037
LIHC	PEBP1	Exhausted	0.17643	0.000722113	0.0222403	5037
LIHC	PEBP1	Gamma_delta	0.147722	0.00474024	0.0828735	5037
LIHC	PEBP1	InfiltrationScore	0.0996718	0.0574581	0.230851	5037
LIHC	PEBP1	MAIT	-0.0343695	0.513327	0.662644	5037
LIHC	PEBP1	Macrophage	0.02432	0.643746	0.814944	5037
LIHC	PEBP1	Monocyte	0.0162599	0.75719	0.926017	5037
LIHC	PEBP1	NK	0.00824146	0.875482	0.93954	5037
LIHC	PEBP1	NKT	-0.0264934	0.614393	0.941681	5037
LIHC	PEBP1	Neutrophil	-0.0903896	0.0850481	0.285137	5037
LIHC	PEBP1	Tfh	0.0364838	0.487742	0.74344	5037
LIHC	PEBP1	Th1	0.130398	0.0127772	0.168859	5037
LIHC	PEBP1	Th17	-0.192733	0.000216281	0.0134656	5037
LIHC	PEBP1	Th2	-0.00191585	0.970942	0.987204	5037
LIHC	PEBP1	Tr1	0.0704988	0.179572	0.47542	5037
LIHC	PEBP1	iTreg	-0.00395742	0.940021	0.999976	5037
LIHC	PEBP1	nTreg	0.0769891	0.142653	0.489476	5037
LIHC	YY1	Bcell	-0.191795	0.000232458	0.00170908	7528
LIHC	YY1	CD4_T	0.117477	0.0250013	0.0631586	7528
LIHC	YY1	CD4_naive	0.0296676	0.572618	0.846683	7528
LIHC	YY1	CD8_T	0.023299	0.657731	0.834337	7528
LIHC	YY1	CD8_naive	-0.0542378	0.302076	0.715014	7528
LIHC	YY1	Central_memory	0.101277	0.0535373	0.19101	7528
LIHC	YY1	Cytotoxic	0.110098	0.0357555	0.155397	7528
LIHC	YY1	DC	-0.0482698	0.358463	0.623663	7528
LIHC	YY1	Effector_memory	-0.0844858	0.107568	0.277189	7528
LIHC	YY1	Exhausted	-0.0284105	0.589003	0.788717	7528
LIHC	YY1	Gamma_delta	0.0794372	0.130345	0.388637	7528
LIHC	YY1	InfiltrationScore	0.0599578	0.253864	0.562372	7528
LIHC	YY1	MAIT	0.111332	0.0337218	0.0951085	7528
LIHC	YY1	Macrophage	0.00923521	0.860613	0.938027	7528
LIHC	YY1	Monocyte	0.038147	0.468108	0.782623	7528
LIHC	YY1	NK	0.126243	0.0159559	0.0848999	7528
LIHC	YY1	NKT	-0.0288117	0.583751	0.927801	7528
LIHC	YY1	Neutrophil	-0.0446428	0.395757	0.719534	7528
LIHC	YY1	Tfh	0.148387	0.00455367	0.0240475	7528
LIHC	YY1	Th1	0.114174	0.0294104	0.18962	7528
LIHC	YY1	Th17	0.0583508	0.266836	0.476376	7528
LIHC	YY1	Th2	0.0310122	0.555337	0.761622	7528
LIHC	YY1	Tr1	-0.0222832	0.671765	0.789489	7528
LIHC	YY1	iTreg	-0.0155604	0.767329	0.98882	7528
LIHC	YY1	nTreg	-0.214602	3.6519e-05	0.00829993	7528
LUAD	PEBP1	Bcell	-0.00590577	0.893951	0.954621	5037
LUAD	PEBP1	CD4_T	-0.175442	6.5769e-05	0.000416552	5037
LUAD	PEBP1	CD4_naive	-0.163091	0.000210424	0.0207111	5037
LUAD	PEBP1	CD8_T	0.028685	0.517235	0.763684	5037
LUAD	PEBP1	CD8_naive	-0.113402	0.0102284	0.0501445	5037
LUAD	PEBP1	Central_memory	-0.0226692	0.60882	0.912036	5037
LUAD	PEBP1	Cytotoxic	0.0792995	0.0730078	0.175519	5037
LUAD	PEBP1	DC	-0.0171481	0.698685	0.804409	5037
LUAD	PEBP1	Effector_memory	0.0959934	0.0298713	0.0808477	5037
LUAD	PEBP1	Exhausted	0.134347	0.00231672	0.0149848	5037
LUAD	PEBP1	Gamma_delta	-0.0289555	0.51329	0.938078	5037
LUAD	PEBP1	InfiltrationScore	-0.0217258	0.623811	0.711617	5037
LUAD	PEBP1	MAIT	0.00138067	0.975138	0.981931	5037
LUAD	PEBP1	Macrophage	-0.0142764	0.747252	0.823005	5037
LUAD	PEBP1	Monocyte	0.0871905	0.0486289	0.234247	5037
LUAD	PEBP1	NK	-0.0324812	0.463338	0.613452	5037
LUAD	PEBP1	NKT	-0.178307	4.964e-05	0.000660743	5037
LUAD	PEBP1	Neutrophil	0.088353	0.0456926	0.0997705	5037
LUAD	PEBP1	Tfh	-0.136311	0.00199297	0.00697234	5037
LUAD	PEBP1	Th1	0.154236	0.000461078	0.0035872	5037
LUAD	PEBP1	Th17	-0.0597561	0.177007	0.303519	5037
LUAD	PEBP1	Th2	-0.240328	3.67889e-08	4.86244e-06	5037
LUAD	PEBP1	Tr1	0.000749494	0.986502	0.995636	5037
LUAD	PEBP1	iTreg	0.157668	0.000341843	0.00613885	5037
LUAD	PEBP1	nTreg	0.29936	4.63207e-12	2.81207e-10	5037
LUAD	YY1	Bcell	0.0295952	0.504024	0.742747	7528
LUAD	YY1	CD4_T	0.00210118	0.962172	0.975517	7528
LUAD	YY1	CD4_naive	-0.0612457	0.166437	0.514932	7528
LUAD	YY1	CD8_T	0.0233446	0.598187	0.808653	7528
LUAD	YY1	CD8_naive	0.0644413	0.145368	0.308503	7528
LUAD	YY1	Central_memory	-0.00304097	0.945275	0.994494	7528
LUAD	YY1	Cytotoxic	-0.0137585	0.756125	0.904628	7528
LUAD	YY1	DC	-0.0157794	0.721693	0.821494	7528
LUAD	YY1	Effector_memory	-0.053626	0.225771	0.349651	7528
LUAD	YY1	Exhausted	-0.0323241	0.465504	0.603673	7528
LUAD	YY1	Gamma_delta	0.0399386	0.367132	0.909928	7528
LUAD	YY1	InfiltrationScore	-0.00828718	0.851612	0.888528	7528
LUAD	YY1	MAIT	0.0711684	0.107734	0.198217	7528
LUAD	YY1	Macrophage	0.0516845	0.243045	0.396762	7528
LUAD	YY1	Monocyte	-0.0426337	0.335662	0.604475	7528
LUAD	YY1	NK	0.00624027	0.887982	0.931476	7528
LUAD	YY1	NKT	0.051268	0.246868	0.387165	7528
LUAD	YY1	Neutrophil	-0.020537	0.642925	0.788986	7528
LUAD	YY1	Tfh	-0.00491417	0.911677	0.939698	7528
LUAD	YY1	Th1	0.0918275	0.0377895	0.11374	7528
LUAD	YY1	Th17	-0.0400757	0.365489	0.52827	7528
LUAD	YY1	Th2	-0.00421817	0.924145	0.96276	7528
LUAD	YY1	Tr1	-0.0135125	0.760351	0.87816	7528
LUAD	YY1	iTreg	-0.0232084	0.600325	0.829086	7528
LUAD	YY1	nTreg	-0.0676939	0.126079	0.225033	7528
LUSC	PEBP1	Bcell	-0.00757378	0.865983	0.953491	5037
LUSC	PEBP1	CD4_T	0.0510873	0.254668	0.342668	5037
LUSC	PEBP1	CD4_naive	0.0186836	0.677153	0.882447	5037
LUSC	PEBP1	CD8_T	0.125485	0.00499758	0.0217159	5037
LUSC	PEBP1	CD8_naive	-0.0323713	0.470605	0.653691	5037
LUSC	PEBP1	Central_memory	0.0657567	0.142431	0.243393	5037
LUSC	PEBP1	Cytotoxic	0.116312	0.00930829	0.0211432	5037
LUSC	PEBP1	DC	0.0173917	0.698345	0.881445	5037
LUSC	PEBP1	Effector_memory	-0.0337812	0.451487	0.621231	5037
LUSC	PEBP1	Exhausted	0.0868714	0.0524575	0.15388	5037
LUSC	PEBP1	Gamma_delta	0.102741	0.0217118	0.16425	5037
LUSC	PEBP1	InfiltrationScore	0.0278599	0.534663	0.614406	5037
LUSC	PEBP1	MAIT	-0.0928116	0.0382162	0.209027	5037
LUSC	PEBP1	Macrophage	-0.0211448	0.637493	0.729961	5037
LUSC	PEBP1	Monocyte	-0.0841035	0.0604707	0.211091	5037
LUSC	PEBP1	NK	0.0563529	0.208873	0.35928	5037
LUSC	PEBP1	NKT	-0.175912	7.7966e-05	0.00219119	5037
LUSC	PEBP1	Neutrophil	-0.0383481	0.392663	0.485166	5037
LUSC	PEBP1	Tfh	0.0787558	0.0788174	0.1152	5037
LUSC	PEBP1	Th1	0.0900493	0.0443686	0.144156	5037
LUSC	PEBP1	Th17	-0.133128	0.00288553	0.0263031	5037
LUSC	PEBP1	Th2	0.0815795	0.0686353	0.112487	5037
LUSC	PEBP1	Tr1	0.00475282	0.915658	0.946175	5037
LUSC	PEBP1	iTreg	0.119637	0.00746414	0.0408312	5037
LUSC	PEBP1	nTreg	0.0939544	0.0358908	0.203904	5037
LUSC	YY1	Bcell	-0.0399074	0.373691	0.707641	7528
LUSC	YY1	CD4_T	-0.19021	1.8907e-05	0.00020464	7528
LUSC	YY1	CD4_naive	-0.0127161	0.776904	0.925419	7528
LUSC	YY1	CD8_T	-0.140243	0.0016868	0.0098974	7528
LUSC	YY1	CD8_naive	0.15661	0.000445877	0.00289613	7528
LUSC	YY1	Central_memory	-0.120991	0.00681174	0.0313918	7528
LUSC	YY1	Cytotoxic	-0.148371	0.000885872	0.00362659	7528
LUSC	YY1	DC	0.0275711	0.538908	0.811556	7528
LUSC	YY1	Effector_memory	0.0912398	0.0416218	0.110924	7528
LUSC	YY1	Exhausted	-0.162943	0.000256989	0.00374789	7528
LUSC	YY1	Gamma_delta	-0.0859844	0.054923	0.262094	7528
LUSC	YY1	InfiltrationScore	-0.146864	0.00100072	0.00485764	7528
LUSC	YY1	MAIT	0.0607305	0.175588	0.440099	7528
LUSC	YY1	Macrophage	-0.0463669	0.301268	0.455953	7528
LUSC	YY1	Monocyte	0.0402307	0.369828	0.660856	7528
LUSC	YY1	NK	-0.119926	0.00732045	0.0292843	7528
LUSC	YY1	NKT	0.0578309	0.19716	0.347403	7528
LUSC	YY1	Neutrophil	0.098803	0.0273169	0.0454758	7528
LUSC	YY1	Tfh	-0.20346	4.61533e-06	3.6372e-05	7528
LUSC	YY1	Th1	-0.00669201	0.881463	0.932162	7528
LUSC	YY1	Th17	0.131342	0.0032892	0.0281887	7528
LUSC	YY1	Th2	-0.0834969	0.0623557	0.104332	7528
LUSC	YY1	Tr1	-0.0526416	0.24048	0.359884	7528
LUSC	YY1	iTreg	-0.174557	8.8671e-05	0.00288869	7528
LUSC	YY1	nTreg	-0.0624553	0.163618	0.435498	7528
MESO	PEBP1	Bcell	-0.0255943	0.813966	0.991703	5037
MESO	PEBP1	CD4_T	-0.00127216	0.99067	0.995793	5037
MESO	PEBP1	CD4_naive	-0.0560439	0.606143	0.952655	5037
MESO	PEBP1	CD8_T	-0.103517	0.340011	0.999445	5037
MESO	PEBP1	CD8_naive	-0.0203197	0.851811	0.938343	5037
MESO	PEBP1	Central_memory	0.0842244	0.437979	0.726458	5037
MESO	PEBP1	Cytotoxic	0.013621	0.900352	0.962911	5037
MESO	PEBP1	DC	0.064095	0.555326	0.831834	5037
MESO	PEBP1	Effector_memory	-0.0647362	0.551368	0.872359	5037
MESO	PEBP1	Exhausted	0.0313968	0.772822	0.982355	5037
MESO	PEBP1	Gamma_delta	-0.0325427	0.764767	0.989112	5037
MESO	PEBP1	InfiltrationScore	0.0576309	0.595966	0.827657	5037
MESO	PEBP1	MAIT	-0.0219649	0.839966	0.946204	5037
MESO	PEBP1	Macrophage	0.198994	0.064635	0.560763	5037
MESO	PEBP1	Monocyte	0.142055	0.18935	0.857695	5037
MESO	PEBP1	NK	-0.17863	0.097845	0.824461	5037
MESO	PEBP1	NKT	0.053824	0.620505	0.976847	5037
MESO	PEBP1	Neutrophil	0.0481895	0.657594	0.990742	5037
MESO	PEBP1	Tfh	-0.00219304	0.983916	0.993451	5037
MESO	PEBP1	Th1	-0.0142334	0.895896	0.984254	5037
MESO	PEBP1	Th17	-0.024486	0.821885	0.950312	5037
MESO	PEBP1	Th2	-0.0176474	0.87112	0.979534	5037
MESO	PEBP1	Tr1	-0.0461409	0.671293	0.84066	5037
MESO	PEBP1	iTreg	-0.0327326	0.763434	0.999609	5037
MESO	PEBP1	nTreg	0.120872	0.264763	0.645136	5037
MESO	YY1	Bcell	0.146589	0.175468	0.721011	7528
MESO	YY1	CD4_T	0.00768403	0.943687	0.98636	7528
MESO	YY1	CD4_naive	0.0676538	0.533535	0.94217	7528
MESO	YY1	CD8_T	0.194005	0.0717765	0.999445	7528
MESO	YY1	CD8_naive	-0.111498	0.303877	0.776363	7528
MESO	YY1	Central_memory	0.222302	0.0385019	0.397037	7528
MESO	YY1	Cytotoxic	0.151311	0.161816	0.626281	7528
MESO	YY1	DC	0.175124	0.10472	0.536414	7528
MESO	YY1	Effector_memory	0.0555248	0.609488	0.891435	7528
MESO	YY1	Exhausted	-0.0305715	0.778639	0.982355	7528
MESO	YY1	Gamma_delta	0.259129	0.0153682	0.388313	7528
MESO	YY1	InfiltrationScore	0.0306385	0.778166	0.924257	7528
MESO	YY1	MAIT	-0.0682294	0.530051	0.923326	7528
MESO	YY1	Macrophage	0.0236628	0.82778	0.913175	7528
MESO	YY1	Monocyte	-0.247933	0.0205914	0.311293	7528
MESO	YY1	NK	-0.0106555	0.921969	0.990867	7528
MESO	YY1	NKT	-0.0626967	0.564003	0.976847	7528
MESO	YY1	Neutrophil	-0.163115	0.131157	0.873877	7528
MESO	YY1	Tfh	0.11635	0.283185	0.770898	7528
MESO	YY1	Th1	0.237199	0.0269583	0.39538	7528
MESO	YY1	Th17	-0.293161	0.00585674	0.108808	7528
MESO	YY1	Th2	-0.0389655	0.7201	0.958299	7528
MESO	YY1	Tr1	0.171577	0.112054	0.372977	7528
MESO	YY1	iTreg	0.251698	0.0186866	0.471167	7528
MESO	YY1	nTreg	-0.075706	0.485849	0.760998	7528
OV	PEBP1	Bcell	-0.045619	0.431132	0.76327	5037
OV	PEBP1	CD4_T	0.0857853	0.13824	0.689562	5037
OV	PEBP1	CD4_naive	0.0793209	0.170592	0.846222	5037
OV	PEBP1	CD8_T	-0.0933212	0.106713	0.557302	5037
OV	PEBP1	CD8_naive	0.181596	0.0015858	0.018432	5037
OV	PEBP1	Central_memory	-0.0706893	0.222165	0.508177	5037
OV	PEBP1	Cytotoxic	-0.141822	0.0139472	0.108473	5037
OV	PEBP1	DC	-0.0365231	0.528584	0.807043	5037
OV	PEBP1	Effector_memory	-0.131018	0.0232305	0.175321	5037
OV	PEBP1	Exhausted	-0.186562	0.0011687	0.0283653	5037
OV	PEBP1	Gamma_delta	-0.11268	0.0512063	0.394464	5037
OV	PEBP1	InfiltrationScore	-0.0386036	0.505353	0.72408	5037
OV	PEBP1	MAIT	-0.121728	0.0350808	0.138113	5037
OV	PEBP1	Macrophage	-0.111406	0.0539099	0.198525	5037
OV	PEBP1	Monocyte	0.0981304	0.0897592	0.310519	5037
OV	PEBP1	NK	-0.109997	0.0570361	0.226622	5037
OV	PEBP1	NKT	-0.142128	0.0137408	0.263933	5037
OV	PEBP1	Neutrophil	0.139186	0.0158449	0.0900692	5037
OV	PEBP1	Tfh	-0.117712	0.0416095	0.146778	5037
OV	PEBP1	Th1	-0.125919	0.029216	0.173096	5037
OV	PEBP1	Th17	0.00824244	0.886946	0.957496	5037
OV	PEBP1	Th2	0.00448761	0.938303	0.987785	5037
OV	PEBP1	Tr1	0.140609	0.0147947	0.178495	5037
OV	PEBP1	iTreg	-0.0109547	0.850129	0.947455	5037
OV	PEBP1	nTreg	0.0429004	0.459121	0.910567	5037
OV	YY1	Bcell	0.0569382	0.325667	0.680813	7528
OV	YY1	CD4_T	0.00886957	0.878408	0.979191	7528
OV	YY1	CD4_naive	0.0113155	0.845254	0.959546	7528
OV	YY1	CD8_T	0.0662546	0.252611	0.652371	7528
OV	YY1	CD8_naive	-0.128764	0.0257316	0.117901	7528
OV	YY1	Central_memory	0.0793867	0.170237	0.451817	7528
OV	YY1	Cytotoxic	0.0582057	0.314996	0.51233	7528
OV	YY1	DC	0.0405759	0.483833	0.789048	7528
OV	YY1	Effector_memory	-0.0224008	0.699184	0.863325	7528
OV	YY1	Exhausted	0.128572	0.0259553	0.105287	7528
OV	YY1	Gamma_delta	0.00799643	0.890299	0.963303	7528
OV	YY1	InfiltrationScore	0.0695023	0.230046	0.509231	7528
OV	YY1	MAIT	0.116751	0.0433142	0.156663	7528
OV	YY1	Macrophage	0.125692	0.0295106	0.133997	7528
OV	YY1	Monocyte	-0.0733951	0.204926	0.460545	7528
OV	YY1	NK	0.0381722	0.510126	0.749419	7528
OV	YY1	NKT	0.0621837	0.283004	0.819412	7528
OV	YY1	Neutrophil	-0.0913852	0.114213	0.258207	7528
OV	YY1	Tfh	0.126077	0.0290125	0.116463	7528
OV	YY1	Th1	0.119808	0.0380839	0.196175	7528
OV	YY1	Th17	-0.0770962	0.182941	0.45612	7528
OV	YY1	Th2	0.00208765	0.971276	0.993746	7528
OV	YY1	Tr1	0.112456	0.0516739	0.25058	7528
OV	YY1	iTreg	-0.0212018	0.714564	0.887067	7528
OV	YY1	nTreg	-0.0332684	0.565982	0.939734	7528
PAAD	PEBP1	Bcell	-0.0367614	0.627125	0.837194	5037
PAAD	PEBP1	CD4_T	0.127159	0.0916776	0.203912	5037
PAAD	PEBP1	CD4_naive	-0.102549	0.174386	0.923716	5037
PAAD	PEBP1	CD8_T	0.0855851	0.257362	0.512509	5037
PAAD	PEBP1	CD8_naive	-0.0889923	0.23883	0.542168	5037
PAAD	PEBP1	Central_memory	-0.0552266	0.465333	0.675483	5037
PAAD	PEBP1	Cytotoxic	-0.00731288	0.923041	0.966791	5037
PAAD	PEBP1	DC	-0.133341	0.0768384	0.342268	5037
PAAD	PEBP1	Effector_memory	0.112616	0.135595	0.564309	5037
PAAD	PEBP1	Exhausted	-0.00610755	0.935696	0.985363	5037
PAAD	PEBP1	Gamma_delta	0.182978	0.0147799	0.0493588	5037
PAAD	PEBP1	InfiltrationScore	-0.0691514	0.360414	0.673236	5037
PAAD	PEBP1	MAIT	0.106496	0.158298	0.361623	5037
PAAD	PEBP1	Macrophage	-0.104415	0.166635	0.535363	5037
PAAD	PEBP1	Monocyte	-0.159016	0.034511	0.108885	5037
PAAD	PEBP1	NK	0.0860557	0.254745	0.521624	5037
PAAD	PEBP1	NKT	-0.0266192	0.725065	0.902077	5037
PAAD	PEBP1	Neutrophil	0.0109135	0.885366	0.932834	5037
PAAD	PEBP1	Tfh	0.0556948	0.461553	0.654349	5037
PAAD	PEBP1	Th1	0.138006	0.0669781	0.53815	5037
PAAD	PEBP1	Th17	-0.0290944	0.700671	0.933881	5037
PAAD	PEBP1	Th2	-0.0627453	0.406723	0.740806	5037
PAAD	PEBP1	Tr1	-0.16085	0.0324557	0.158679	5037
PAAD	PEBP1	iTreg	-0.12539	0.0963222	0.527415	5037
PAAD	PEBP1	nTreg	-0.193578	0.00983408	0.0422437	5037
PAAD	YY1	Bcell	-0.14905	0.0477028	0.381355	7528
PAAD	YY1	CD4_T	-0.0604693	0.423987	0.608288	7528
PAAD	YY1	CD4_naive	0.0596442	0.430349	0.923716	7528
PAAD	YY1	CD8_T	-0.112237	0.136924	0.348601	7528
PAAD	YY1	CD8_naive	0.109701	0.146078	0.447493	7528
PAAD	YY1	Central_memory	-0.129059	0.0868941	0.309877	7528
PAAD	YY1	Cytotoxic	-0.167577	0.0257833	0.0964971	7528
PAAD	YY1	DC	-0.0887169	0.240293	0.526722	7528
PAAD	YY1	Effector_memory	0.0336557	0.656526	0.906865	7528
PAAD	YY1	Exhausted	-0.134563	0.0741484	0.727954	7528
PAAD	YY1	Gamma_delta	-0.1588	0.0347605	0.0949693	7528
PAAD	YY1	InfiltrationScore	-0.165644	0.0275679	0.122884	7528
PAAD	YY1	MAIT	-0.0192847	0.798899	0.866804	7528
PAAD	YY1	Macrophage	-0.108508	0.150541	0.506216	7528
PAAD	YY1	Monocyte	0.10233	0.175312	0.38582	7528
PAAD	YY1	NK	-0.144676	0.0546971	0.178349	7528
PAAD	YY1	NKT	-0.0393553	0.603008	0.830956	7528
PAAD	YY1	Neutrophil	0.179528	0.0168027	0.0621743	7528
PAAD	YY1	Tfh	-0.157512	0.0362774	0.096547	7528
PAAD	YY1	Th1	-0.0118777	0.875317	0.95686	7528
PAAD	YY1	Th17	0.072883	0.335017	0.718031	7528
PAAD	YY1	Th2	-0.0775702	0.304778	0.678459	7528
PAAD	YY1	Tr1	-0.0537857	0.477073	0.684481	7528
PAAD	YY1	iTreg	-0.0168194	0.82416	0.947154	7528
PAAD	YY1	nTreg	0.0372183	0.622847	0.721297	7528
PCPG	PEBP1	Bcell	0.0732551	0.354233	0.515212	5037
PCPG	PEBP1	CD4_T	0.0143447	0.856232	0.914111	5037
PCPG	PEBP1	CD4_naive	-0.0883192	0.263737	0.839122	5037
PCPG	PEBP1	CD8_T	-0.142367	0.0707281	0.373941	5037
PCPG	PEBP1	CD8_naive	-0.0626349	0.428467	0.698608	5037
PCPG	PEBP1	Central_memory	0.0667894	0.398418	0.64484	5037
PCPG	PEBP1	Cytotoxic	-0.0779023	0.32445	0.920244	5037
PCPG	PEBP1	DC	0.131241	0.0959727	0.906294	5037
PCPG	PEBP1	Effector_memory	-0.0131097	0.868492	0.926792	5037
PCPG	PEBP1	Exhausted	0.0836676	0.289816	0.677752	5037
PCPG	PEBP1	Gamma_delta	-0.00146255	0.985263	0.997171	5037
PCPG	PEBP1	InfiltrationScore	0.0607881	0.442234	0.999453	5037
PCPG	PEBP1	MAIT	-0.0539399	0.495414	0.669922	5037
PCPG	PEBP1	Macrophage	0.144991	0.0656383	0.576188	5037
PCPG	PEBP1	Monocyte	0.0829501	0.293986	0.546836	5037
PCPG	PEBP1	NK	-0.0909642	0.249646	0.681175	5037
PCPG	PEBP1	NKT	0.00536532	0.945976	0.98698	5037
PCPG	PEBP1	Neutrophil	-0.0148355	0.851368	0.971934	5037
PCPG	PEBP1	Tfh	-0.0631927	0.424359	0.841199	5037
PCPG	PEBP1	Th1	-0.0679416	0.390311	0.522454	5037
PCPG	PEBP1	Th17	0.0788719	0.318445	0.497754	5037
PCPG	PEBP1	Th2	-0.0654396	0.40804	0.879705	5037
PCPG	PEBP1	Tr1	0.0443352	0.575343	0.869939	5037
PCPG	PEBP1	iTreg	0.0128522	0.871053	0.975773	5037
PCPG	PEBP1	nTreg	0.0355498	0.65335	0.795538	5037
PCPG	YY1	Bcell	0.136875	0.0824167	0.191492	7528
PCPG	YY1	CD4_T	0.0721765	0.361383	0.676797	7528
PCPG	YY1	CD4_naive	0.0439403	0.578753	0.865864	7528
PCPG	YY1	CD8_T	-0.0180804	0.819364	0.943549	7528
PCPG	YY1	CD8_naive	0.0112949	0.886565	0.952526	7528
PCPG	YY1	Central_memory	-0.0611855	0.439251	0.686544	7528
PCPG	YY1	Cytotoxic	-0.105915	0.179784	0.920244	7528
PCPG	YY1	DC	0.0206964	0.793776	0.998025	7528
PCPG	YY1	Effector_memory	0.199984	0.010726	0.049792	7528
PCPG	YY1	Exhausted	-0.064544	0.4145	0.775483	7528
PCPG	YY1	Gamma_delta	-0.0902574	0.25336	0.642325	7528
PCPG	YY1	InfiltrationScore	-0.0388882	0.623201	0.999453	7528
PCPG	YY1	MAIT	-0.151244	0.0547084	0.192728	7528
PCPG	YY1	Macrophage	0.000173676	0.99825	0.998466	7528
PCPG	YY1	Monocyte	-0.160141	0.0417867	0.118374	7528
PCPG	YY1	NK	-0.0817036	0.301326	0.711481	7528
PCPG	YY1	NKT	-0.118705	0.132455	0.524874	7528
PCPG	YY1	Neutrophil	-0.00991489	0.900348	0.974807	7528
PCPG	YY1	Tfh	-0.0367311	0.642614	0.92212	7528
PCPG	YY1	Th1	0.057662	0.466099	0.594839	7528
PCPG	YY1	Th17	-0.038388	0.62768	0.727221	7528
PCPG	YY1	Th2	0.0410503	0.603999	0.92178	7528
PCPG	YY1	Tr1	0.0850464	0.281913	0.735737	7528
PCPG	YY1	iTreg	0.0935976	0.236144	0.840843	7528
PCPG	YY1	nTreg	0.131554	0.095177	0.282843	7528
PRAD	PEBP1	Bcell	-0.0642452	0.155195	0.574549	5037
PRAD	PEBP1	CD4_T	0.0504254	0.264759	0.552096	5037
PRAD	PEBP1	CD4_naive	-0.0562458	0.213451	0.600989	5037
PRAD	PEBP1	CD8_T	-0.0589779	0.192006	0.579556	5037
PRAD	PEBP1	CD8_naive	-0.0194785	0.666791	0.999125	5037
PRAD	PEBP1	Central_memory	0.0726021	0.108103	0.444329	5037
PRAD	PEBP1	Cytotoxic	0.0662526	0.142668	0.555327	5037
PRAD	PEBP1	DC	0.0288151	0.524122	0.652824	5037
PRAD	PEBP1	Effector_memory	-0.0292435	0.517969	0.859565	5037
PRAD	PEBP1	Exhausted	-0.00744232	0.869343	0.915536	5037
PRAD	PEBP1	Gamma_delta	-0.0448648	0.321148	0.985746	5037
PRAD	PEBP1	InfiltrationScore	0.0533322	0.238164	0.430706	5037
PRAD	PEBP1	MAIT	0.132834	0.00318824	0.676738	5037
PRAD	PEBP1	Macrophage	0.0877469	0.052	0.109619	5037
PRAD	PEBP1	Monocyte	0.00607026	0.893271	0.955747	5037
PRAD	PEBP1	NK	0.0453734	0.315687	0.705365	5037
PRAD	PEBP1	NKT	0.00218349	0.961509	0.995947	5037
PRAD	PEBP1	Neutrophil	-0.0406507	0.36874	0.759886	5037
PRAD	PEBP1	Tfh	0.0622564	0.16841	0.365449	5037
PRAD	PEBP1	Th1	0.0325054	0.472371	0.799985	5037
PRAD	PEBP1	Th17	-0.0524183	0.246314	0.491905	5037
PRAD	PEBP1	Th2	0.00867039	0.848027	0.924151	5037
PRAD	PEBP1	Tr1	-0.0131909	0.770625	0.961542	5037
PRAD	PEBP1	iTreg	-0.00278889	0.950849	0.978693	5037
PRAD	PEBP1	nTreg	-0.0250208	0.580197	0.866107	5037
PRAD	YY1	Bcell	0.0168772	0.709114	0.943238	7528
PRAD	YY1	CD4_T	-0.0845462	0.0612071	0.214179	7528
PRAD	YY1	CD4_naive	-0.0338281	0.45453	0.792919	7528
PRAD	YY1	CD8_T	-0.0959604	0.0335175	0.28377	7528
PRAD	YY1	CD8_naive	0.0363662	0.421378	0.999125	7528
PRAD	YY1	Central_memory	-0.0437475	0.333358	0.655933	7528
PRAD	YY1	Cytotoxic	-0.0628862	0.164137	0.580993	7528
PRAD	YY1	DC	0.102415	0.0232342	0.0653738	7528
PRAD	YY1	Effector_memory	-0.0740457	0.101252	0.685113	7528
PRAD	YY1	Exhausted	-0.0241013	0.594196	0.732102	7528
PRAD	YY1	Gamma_delta	-0.167037	0.000200804	0.0109285	7528
PRAD	YY1	InfiltrationScore	0.0691433	0.126007	0.283028	7528
PRAD	YY1	MAIT	0.0736904	0.102906	0.754272	7528
PRAD	YY1	Macrophage	0.161306	0.000332297	0.00127021	7528
PRAD	YY1	Monocyte	0.142031	0.00160393	0.0122197	7528
PRAD	YY1	NK	-0.0606337	0.179803	0.529114	7528
PRAD	YY1	NKT	0.0222416	0.62297	0.909693	7528
PRAD	YY1	Neutrophil	0.060804	0.178581	0.518644	7528
PRAD	YY1	Tfh	-0.0899798	0.0462855	0.169753	7528
PRAD	YY1	Th1	-0.0407311	0.367794	0.731957	7528
PRAD	YY1	Th17	0.0214188	0.635889	0.810627	7528
PRAD	YY1	Th2	0.0472255	0.296318	0.624506	7528
PRAD	YY1	Tr1	0.0138315	0.759819	0.960543	7528
PRAD	YY1	iTreg	-0.0686076	0.128975	0.48745	7528
PRAD	YY1	nTreg	-0.0637518	0.158398	0.496984	7528
READ	PEBP1	Bcell	-0.0545742	0.603367	0.927272	5037
READ	PEBP1	CD4_T	-0.0942529	0.368838	0.92054	5037
READ	PEBP1	CD4_naive	-0.135975	0.193736	0.674488	5037
READ	PEBP1	CD8_T	0.0268643	0.79825	0.991812	5037
READ	PEBP1	CD8_naive	-0.0195858	0.852177	0.971256	5037
READ	PEBP1	Central_memory	-0.0969905	0.355031	0.999151	5037
READ	PEBP1	Cytotoxic	0.0449674	0.66865	0.997059	5037
READ	PEBP1	DC	0.0904311	0.388655	0.988383	5037
READ	PEBP1	Effector_memory	0.0304637	0.771912	0.972759	5037
READ	PEBP1	Exhausted	0.0894298	0.39395	0.828973	5037
READ	PEBP1	Gamma_delta	-0.0858398	0.413286	0.678786	5037
READ	PEBP1	InfiltrationScore	0.0472798	0.652685	0.961198	5037
READ	PEBP1	MAIT	0.00615372	0.953317	0.977306	5037
READ	PEBP1	Macrophage	0.0590114	0.574199	0.956282	5037
READ	PEBP1	Monocyte	0.0435803	0.678298	0.915988	5037
READ	PEBP1	NK	0.0598923	0.568487	0.799878	5037
READ	PEBP1	NKT	-0.0277449	0.791784	0.970894	5037
READ	PEBP1	Neutrophil	-0.0601813	0.566619	0.996894	5037
READ	PEBP1	Tfh	-0.0581551	0.579776	0.999551	5037
READ	PEBP1	Th1	0.125724	0.229824	0.775014	5037
READ	PEBP1	Th17	-0.108408	0.300969	0.740531	5037
READ	PEBP1	Th2	0.117683	0.261246	0.989298	5037
READ	PEBP1	Tr1	-0.00852423	0.935367	0.999802	5037
READ	PEBP1	iTreg	0.189145	0.0694005	0.974211	5037
READ	PEBP1	nTreg	0.25914	0.0121328	0.464675	5037
READ	YY1	Bcell	0.0284758	0.786428	0.941886	7528
READ	YY1	CD4_T	-0.0693579	0.50886	0.974118	7528
READ	YY1	CD4_naive	-0.0194199	0.853414	0.955777	7528
READ	YY1	CD8_T	0.202253	0.0518692	0.785359	7528
READ	YY1	CD8_naive	-0.0447665	0.670044	0.926173	7528
READ	YY1	Central_memory	-0.0464034	0.658718	0.999151	7528
READ	YY1	Cytotoxic	0.127368	0.22374	0.859376	7528
READ	YY1	DC	-0.00698742	0.947001	0.993041	7528
READ	YY1	Effector_memory	0.062476	0.55189	0.92335	7528
READ	YY1	Exhausted	0.052382	0.618016	0.92826	7528
READ	YY1	Gamma_delta	-0.0936214	0.37207	0.648058	7528
READ	YY1	InfiltrationScore	0.00607725	0.953896	0.987435	7528
READ	YY1	MAIT	0.162593	0.119432	0.612727	7528
READ	YY1	Macrophage	0.062458	0.552005	0.956282	7528
READ	YY1	Monocyte	-0.102906	0.326309	0.892412	7528
READ	YY1	NK	0.0257936	0.80613	0.887625	7528
READ	YY1	NKT	-0.209626	0.0437286	0.472058	7528
READ	YY1	Neutrophil	-0.0650942	0.535315	0.996894	7528
READ	YY1	Tfh	-0.0201236	0.848165	0.999551	7528
READ	YY1	Th1	0.0779717	0.457546	0.886159	7528
READ	YY1	Th17	-0.034537	0.742415	0.950777	7528
READ	YY1	Th2	0.203884	0.0499685	0.644323	7528
READ	YY1	Tr1	-0.0958614	0.360686	0.990794	7528
READ	YY1	iTreg	0.0671293	0.522603	0.997264	7528
READ	YY1	nTreg	-0.0448769	0.669278	0.994384	7528
SARC	PEBP1	Bcell	-0.03317	0.598037	0.799597	5037
SARC	PEBP1	CD4_T	-0.0265823	0.672679	0.820751	5037
SARC	PEBP1	CD4_naive	-0.0971175	0.121892	0.39161	5037
SARC	PEBP1	CD8_T	0.0824743	0.189258	0.734136	5037
SARC	PEBP1	CD8_naive	0.0780804	0.214009	0.774993	5037
SARC	PEBP1	Central_memory	-0.0508075	0.419167	0.682175	5037
SARC	PEBP1	Cytotoxic	0.0490827	0.435151	0.832238	5037
SARC	PEBP1	DC	-0.0794127	0.206271	0.459551	5037
SARC	PEBP1	Effector_memory	-0.0437452	0.48677	0.786737	5037
SARC	PEBP1	Exhausted	0.0723949	0.249368	0.643881	5037
SARC	PEBP1	Gamma_delta	0.0692946	0.270272	0.802775	5037
SARC	PEBP1	InfiltrationScore	0.0450092	0.474256	0.752428	5037
SARC	PEBP1	MAIT	-0.0154774	0.805717	0.972032	5037
SARC	PEBP1	Macrophage	0.0353022	0.574705	0.706544	5037
SARC	PEBP1	Monocyte	0.0162238	0.796547	0.889582	5037
SARC	PEBP1	NK	-0.0251555	0.68931	0.867569	5037
SARC	PEBP1	NKT	-0.109057	0.0821884	0.280609	5037
SARC	PEBP1	Neutrophil	0.0332091	0.597606	0.894357	5037
SARC	PEBP1	Tfh	0.00275573	0.965072	0.991301	5037
SARC	PEBP1	Th1	0.0271614	0.665973	0.962598	5037
SARC	PEBP1	Th17	0.00393564	0.950134	0.980572	5037
SARC	PEBP1	Th2	0.112265	0.0735214	0.341476	5037
SARC	PEBP1	Tr1	-0.0377583	0.54837	0.910669	5037
SARC	PEBP1	iTreg	0.0874798	0.163696	0.375996	5037
SARC	PEBP1	nTreg	0.126778	0.0431028	0.262274	5037
SARC	YY1	Bcell	-0.0121428	0.846991	0.939851	7528
SARC	YY1	CD4_T	0.000413647	0.994756	0.997256	7528
SARC	YY1	CD4_naive	-0.00672391	0.914911	0.975832	7528
SARC	YY1	CD8_T	0.0410989	0.513531	0.907585	7528
SARC	YY1	CD8_naive	-0.0825795	0.188693	0.746573	7528
SARC	YY1	Central_memory	0.0611943	0.330401	0.631439	7528
SARC	YY1	Cytotoxic	0.0177822	0.777495	0.939727	7528
SARC	YY1	DC	-0.0168106	0.789358	0.906434	7528
SARC	YY1	Effector_memory	0.072253	0.250299	0.584359	7528
SARC	YY1	Exhausted	0.0157344	0.802557	0.960944	7528
SARC	YY1	Gamma_delta	-0.0446025	0.478263	0.903132	7528
SARC	YY1	InfiltrationScore	-0.099288	0.113736	0.573152	7528
SARC	YY1	MAIT	-0.0621868	0.322603	0.882417	7528
SARC	YY1	Macrophage	-0.0775508	0.217142	0.410276	7528
SARC	YY1	Monocyte	-0.114174	0.068728	0.191937	7528
SARC	YY1	NK	-0.0153272	0.807565	0.932327	7528
SARC	YY1	NKT	0.155028	0.0131957	0.0989039	7528
SARC	YY1	Neutrophil	-0.0938067	0.135199	0.683238	7528
SARC	YY1	Tfh	0.00699127	0.911541	0.984602	7528
SARC	YY1	Th1	0.164159	0.00863018	0.318986	7528
SARC	YY1	Th17	-0.027905	0.657401	0.902166	7528
SARC	YY1	Th2	-0.113881	0.0694449	0.328426	7528
SARC	YY1	Tr1	-0.01985	0.752418	0.93314	7528
SARC	YY1	iTreg	0.134598	0.0316674	0.146621	7528
SARC	YY1	nTreg	0.0623148	0.321606	0.610769	7528
SKCM	PEBP1	Bcell	0.0402089	0.442502	0.636114	5037
SKCM	PEBP1	CD4_T	0.0730863	0.162346	0.340472	5037
SKCM	PEBP1	CD4_naive	-0.0638562	0.22232	0.528207	5037
SKCM	PEBP1	CD8_T	0.054239	0.300067	0.54709	5037
SKCM	PEBP1	CD8_naive	-0.0988021	0.0586312	0.187701	5037
SKCM	PEBP1	Central_memory	0.0721962	0.167536	0.4037	5037
SKCM	PEBP1	Cytotoxic	0.0895374	0.0867344	0.216382	5037
SKCM	PEBP1	DC	-0.0385922	0.461078	0.833255	5037
SKCM	PEBP1	Effector_memory	-0.0340686	0.51529	0.847519	5037
SKCM	PEBP1	Exhausted	0.0685513	0.190089	0.440512	5037
SKCM	PEBP1	Gamma_delta	0.0365864	0.484716	0.761919	5037
SKCM	PEBP1	InfiltrationScore	0.0702588	0.179261	0.388944	5037
SKCM	PEBP1	MAIT	0.0507464	0.332311	0.667051	5037
SKCM	PEBP1	Macrophage	0.0203855	0.6971	0.918899	5037
SKCM	PEBP1	Monocyte	-0.0619561	0.236414	0.467733	5037
SKCM	PEBP1	NK	0.042908	0.41246	0.685654	5037
SKCM	PEBP1	NKT	-0.0630938	0.227902	0.676457	5037
SKCM	PEBP1	Neutrophil	-0.0958079	0.066747	0.162306	5037
SKCM	PEBP1	Tfh	0.056074	0.283989	0.481644	5037
SKCM	PEBP1	Th1	0.0876464	0.0936281	0.324995	5037
SKCM	PEBP1	Th17	0.0149438	0.775398	0.982528	5037
SKCM	PEBP1	Th2	0.0249971	0.633137	0.772917	5037
SKCM	PEBP1	Tr1	0.00792055	0.879802	0.996173	5037
SKCM	PEBP1	iTreg	0.0909285	0.0819289	0.211553	5037
SKCM	PEBP1	nTreg	0.0619738	0.23628	0.634303	5037
SKCM	YY1	Bcell	0.149894	0.00400148	0.0566014	7528
SKCM	YY1	CD4_T	-0.00842457	0.872216	0.91368	7528
SKCM	YY1	CD4_naive	-0.0191836	0.714152	0.887184	7528
SKCM	YY1	CD8_T	0.0683101	0.191656	0.43987	7528
SKCM	YY1	CD8_naive	-0.133489	0.0104664	0.0639935	7528
SKCM	YY1	Central_memory	0.0715775	0.171217	0.405181	7528
SKCM	YY1	Cytotoxic	0.0892884	0.0876182	0.217424	7528
SKCM	YY1	DC	-0.0104499	0.841862	0.94031	7528
SKCM	YY1	Effector_memory	-0.115277	0.0272281	0.229782	7528
SKCM	YY1	Exhausted	0.0540553	0.30171	0.529287	7528
SKCM	YY1	Gamma_delta	0.0418868	0.423682	0.726668	7528
SKCM	YY1	InfiltrationScore	0.0548591	0.294568	0.523218	7528
SKCM	YY1	MAIT	-0.074118	0.156482	0.502699	7528
SKCM	YY1	Macrophage	-0.00822223	0.87526	0.970589	7528
SKCM	YY1	Monocyte	-0.118138	0.0236106	0.0999874	7528
SKCM	YY1	NK	0.107312	0.0399061	0.143864	7528
SKCM	YY1	NKT	0.0148196	0.777215	0.973109	7528
SKCM	YY1	Neutrophil	-0.0765417	0.143338	0.272245	7528
SKCM	YY1	Tfh	0.0622534	0.234168	0.425136	7528
SKCM	YY1	Th1	0.142163	0.00637143	0.0978754	7528
SKCM	YY1	Th17	-0.0875352	0.0940464	0.413052	7528
SKCM	YY1	Th2	0.0728968	0.163441	0.327221	7528
SKCM	YY1	Tr1	0.0221025	0.673003	0.960963	7528
SKCM	YY1	iTreg	-0.0262967	0.615568	0.741992	7528
SKCM	YY1	nTreg	-0.0677473	0.19535	0.590156	7528
STAD	PEBP1	Bcell	0.106665	0.0302116	0.196125	5037
STAD	PEBP1	CD4_T	-0.00970366	0.844134	0.889769	5037
STAD	PEBP1	CD4_naive	-0.00520458	0.916019	0.985038	5037
STAD	PEBP1	CD8_T	0.128421	0.00898213	0.0561504	5037
STAD	PEBP1	CD8_naive	-0.0358488	0.467496	0.637419	5037
STAD	PEBP1	Central_memory	-0.0143463	0.771294	0.853713	5037
STAD	PEBP1	Cytotoxic	0.093589	0.0573857	0.126884	5037
STAD	PEBP1	DC	0.0470316	0.340374	0.635932	5037
STAD	PEBP1	Effector_memory	-0.0738247	0.134187	0.72538	5037
STAD	PEBP1	Exhausted	0.0875376	0.0755691	0.229325	5037
STAD	PEBP1	Gamma_delta	0.11435	0.0201008	0.138387	5037
STAD	PEBP1	InfiltrationScore	0.0925897	0.0601106	0.162977	5037
STAD	PEBP1	MAIT	-0.112798	0.0218657	0.237149	5037
STAD	PEBP1	Macrophage	0.0749823	0.128173	0.328602	5037
STAD	PEBP1	Monocyte	-0.0587552	0.233474	0.448527	5037
STAD	PEBP1	NK	0.0530904	0.281743	0.498715	5037
STAD	PEBP1	NKT	0.00905199	0.854481	0.978956	5037
STAD	PEBP1	Neutrophil	-0.0782998	0.112093	0.200518	5037
STAD	PEBP1	Tfh	0.0603354	0.221119	0.348992	5037
STAD	PEBP1	Th1	0.0417716	0.397165	0.586355	5037
STAD	PEBP1	Th17	-0.1693	0.000550041	0.00619242	5037
STAD	PEBP1	Th2	0.0495752	0.314872	0.590018	5037
STAD	PEBP1	Tr1	0.101322	0.0395741	0.17598	5037
STAD	PEBP1	iTreg	0.0366617	0.457455	0.655125	5037
STAD	PEBP1	nTreg	0.0394955	0.423407	0.763488	5037
STAD	YY1	Bcell	0.0377281	0.444465	0.677925	7528
STAD	YY1	CD4_T	-0.00114025	0.981569	0.986966	7528
STAD	YY1	CD4_naive	-0.0674852	0.171041	0.890391	7528
STAD	YY1	CD8_T	-0.0508491	0.302583	0.476278	7528
STAD	YY1	CD8_naive	-0.0923692	0.0607258	0.147016	7528
STAD	YY1	Central_memory	0.0171899	0.72761	0.821174	7528
STAD	YY1	Cytotoxic	-0.00821543	0.8678	0.913868	7528
STAD	YY1	DC	0.119474	0.015126	0.190945	7528
STAD	YY1	Effector_memory	-0.0227665	0.644564	0.963458	7528
STAD	YY1	Exhausted	0.00186937	0.969787	0.991238	7528
STAD	YY1	Gamma_delta	-0.0794086	0.107086	0.356287	7528
STAD	YY1	InfiltrationScore	0.0638959	0.195008	0.381795	7528
STAD	YY1	MAIT	0.0521176	0.290666	0.686266	7528
STAD	YY1	Macrophage	0.0504998	0.30592	0.541968	7528
STAD	YY1	Monocyte	-0.0568935	0.248647	0.462393	7528
STAD	YY1	NK	0.0153049	0.756479	0.892039	7528
STAD	YY1	NKT	0.0587287	0.233686	0.689517	7528
STAD	YY1	Neutrophil	0.0302893	0.539331	0.640484	7528
STAD	YY1	Tfh	0.00675091	0.891204	0.934728	7528
STAD	YY1	Th1	0.0279953	0.570497	0.704954	7528
STAD	YY1	Th17	-0.001965	0.968243	0.988524	7528
STAD	YY1	Th2	-0.0473449	0.337164	0.609647	7528
STAD	YY1	Tr1	0.0390777	0.428333	0.66779	7528
STAD	YY1	iTreg	-0.0308027	0.532473	0.709835	7528
STAD	YY1	nTreg	0.0399496	0.418092	0.759872	7528
TGCT	PEBP1	Bcell	-0.153001	0.0615922	0.147998	5037
TGCT	PEBP1	CD4_T	-0.110752	0.177259	0.586563	5037
TGCT	PEBP1	CD4_naive	-0.00305892	0.970365	0.990448	5037
TGCT	PEBP1	CD8_T	-0.176751	0.0304868	0.0813895	5037
TGCT	PEBP1	CD8_naive	0.0634482	0.440496	0.695595	5037
TGCT	PEBP1	Central_memory	-0.125949	0.124593	0.220122	5037
TGCT	PEBP1	Cytotoxic	-0.142466	0.0820118	0.177433	5037
TGCT	PEBP1	DC	0.0335062	0.683973	0.813986	5037
TGCT	PEBP1	Effector_memory	0.135682	0.0978192	0.283678	5037
TGCT	PEBP1	Exhausted	-0.00644216	0.937637	0.980671	5037
TGCT	PEBP1	Gamma_delta	-0.0849583	0.301282	0.575775	5037
TGCT	PEBP1	InfiltrationScore	0.00301806	0.970761	0.979207	5037
TGCT	PEBP1	MAIT	-0.0579818	0.480946	0.652945	5037
TGCT	PEBP1	Macrophage	0.0749298	0.362135	0.565959	5037
TGCT	PEBP1	Monocyte	0.101395	0.216969	0.326172	5037
TGCT	PEBP1	NK	-0.100231	0.222321	0.463015	5037
TGCT	PEBP1	NKT	0.0688181	0.402712	0.610081	5037
TGCT	PEBP1	Neutrophil	0.176522	0.0307066	0.0820612	5037
TGCT	PEBP1	Tfh	-0.168352	0.0394606	0.0810169	5037
TGCT	PEBP1	Th1	-0.0255879	0.755941	0.844967	5037
TGCT	PEBP1	Th17	0.0680132	0.40825	0.642281	5037
TGCT	PEBP1	Th2	0.0372385	0.650968	0.84455	5037
TGCT	PEBP1	Tr1	-0.0234625	0.775651	0.973381	5037
TGCT	PEBP1	iTreg	0.0351939	0.66897	0.880197	5037
TGCT	PEBP1	nTreg	0.0381242	0.64323	0.814306	5037
TGCT	YY1	Bcell	0.0739016	0.368778	0.53492	7528
TGCT	YY1	CD4_T	0.114626	0.162492	0.585154	7528
TGCT	YY1	CD4_naive	-0.0530839	0.518824	0.783513	7528
TGCT	YY1	CD8_T	0.0318636	0.698696	0.821807	7528
TGCT	YY1	CD8_naive	0.0416911	0.612465	0.774421	7528
TGCT	YY1	Central_memory	0.104253	0.204223	0.324384	7528
TGCT	YY1	Cytotoxic	0.0570758	0.487839	0.637822	7528
TGCT	YY1	DC	-0.101853	0.214889	0.499083	7528
TGCT	YY1	Effector_memory	0.0474439	0.564256	0.724827	7528
TGCT	YY1	Exhausted	-0.0417572	0.611901	0.803843	7528
TGCT	YY1	Gamma_delta	-0.112778	0.169418	0.486925	7528
TGCT	YY1	InfiltrationScore	-0.112295	0.171262	0.515995	7528
TGCT	YY1	MAIT	0.138315	0.0914183	0.303597	7528
TGCT	YY1	Macrophage	-0.176852	0.0303909	0.0872785	7528
TGCT	YY1	Monocyte	-0.073457	0.371674	0.48156	7528
TGCT	YY1	NK	0.0459691	0.576442	0.814559	7528
TGCT	YY1	NKT	0.0831262	0.311864	0.497646	7528
TGCT	YY1	Neutrophil	-0.106812	0.193275	0.291805	7528
TGCT	YY1	Tfh	0.0702188	0.393182	0.484048	7528
TGCT	YY1	Th1	0.0321823	0.69583	0.815088	7528
TGCT	YY1	Th17	-0.0322804	0.694949	0.871182	7528
TGCT	YY1	Th2	0.00719957	0.930322	0.965818	7528
TGCT	YY1	Tr1	0.0845226	0.303777	0.723956	7528
TGCT	YY1	iTreg	-0.0584743	0.477222	0.85631	7528
TGCT	YY1	nTreg	-0.111651	0.17375	0.45303	7528
THCA	PEBP1	Bcell	0.0463883	0.302021	0.767412	5037
THCA	PEBP1	CD4_T	-0.0126219	0.778949	0.960004	5037
THCA	PEBP1	CD4_naive	0.0608134	0.17587	0.617373	5037
THCA	PEBP1	CD8_T	-0.0325973	0.468408	0.765631	5037
THCA	PEBP1	CD8_naive	0.076764	0.0873488	0.595315	5037
THCA	PEBP1	Central_memory	0.0378466	0.399838	0.582748	5037
THCA	PEBP1	Cytotoxic	-0.0848329	0.0587755	0.191604	5037
THCA	PEBP1	DC	-0.0453928	0.312525	0.459432	5037
THCA	PEBP1	Effector_memory	0.0169027	0.706992	0.925019	5037
THCA	PEBP1	Exhausted	-0.0310338	0.490021	0.999701	5037
THCA	PEBP1	Gamma_delta	0.0402655	0.37038	0.567393	5037
THCA	PEBP1	InfiltrationScore	-0.0708527	0.114666	0.268227	5037
THCA	PEBP1	MAIT	0.0652083	0.146611	0.197641	5037
THCA	PEBP1	Macrophage	-0.0342986	0.445503	0.790709	5037
THCA	PEBP1	Monocyte	-0.0639148	0.154808	0.361163	5037
THCA	PEBP1	NK	-0.0851329	0.057884	0.281925	5037
THCA	PEBP1	NKT	-0.0521933	0.245466	0.405665	5037
THCA	PEBP1	Neutrophil	0.0466157	0.299654	0.48563	5037
THCA	PEBP1	Tfh	-0.0426504	0.342689	0.54889	5037
THCA	PEBP1	Th1	-0.0709061	0.114393	0.264406	5037
THCA	PEBP1	Th17	-0.0268142	0.550918	0.932675	5037
THCA	PEBP1	Th2	0.0679282	0.13046	0.403383	5037
THCA	PEBP1	Tr1	-0.0255427	0.569971	0.676698	5037
THCA	PEBP1	iTreg	-0.0201368	0.654273	0.764116	5037
THCA	PEBP1	nTreg	-0.0829165	0.0647434	0.139356	5037
THCA	YY1	Bcell	0.0156508	0.7278	0.926668	7528
THCA	YY1	CD4_T	-0.024305	0.588811	0.954926	7528
THCA	YY1	CD4_naive	0.0377564	0.400963	0.925472	7528
THCA	YY1	CD8_T	-0.0762884	0.0893324	0.490108	7528
THCA	YY1	CD8_naive	0.0627181	0.162696	0.640717	7528
THCA	YY1	Central_memory	-0.135293	0.00250723	0.0192282	7528
THCA	YY1	Cytotoxic	-0.188592	2.318e-05	0.00219269	7528
THCA	YY1	DC	-0.146847	0.00102596	0.00615266	7528
THCA	YY1	Effector_memory	-0.082755	0.0652684	0.241971	7528
THCA	YY1	Exhausted	-0.091305	0.0418877	0.517139	7528
THCA	YY1	Gamma_delta	0.0354447	0.430436	0.600772	7528
THCA	YY1	InfiltrationScore	-0.153683	0.000586157	0.00917329	7528
THCA	YY1	MAIT	0.252535	1.13984e-08	2.40888e-06	7528
THCA	YY1	Macrophage	-0.103652	0.0208227	0.148012	7528
THCA	YY1	Monocyte	-0.0749569	0.0950794	0.279255	7528
THCA	YY1	NK	-0.0997713	0.0261347	0.281925	7528
THCA	YY1	NKT	0.0313268	0.48593	0.658285	7528
THCA	YY1	Neutrophil	0.166628	0.000190358	0.013533	7528
THCA	YY1	Tfh	-0.163033	0.000262361	0.0144917	7528
THCA	YY1	Th1	-0.17352	0.000101011	0.0130143	7528
THCA	YY1	Th17	0.0342791	0.445761	0.932675	7528
THCA	YY1	Th2	0.0181767	0.68604	0.829213	7528
THCA	YY1	Tr1	-0.127271	0.00448692	0.0232645	7528
THCA	YY1	iTreg	-0.188846	2.259e-05	0.000676	7528
THCA	YY1	nTreg	-0.176293	7.7737e-05	0.00101932	7528
THYM	PEBP1	Bcell	0.00552375	0.952457	0.963801	5037
THYM	PEBP1	CD4_T	-0.0880296	0.341095	0.645858	5037
THYM	PEBP1	CD4_naive	-0.142036	0.123343	0.300579	5037
THYM	PEBP1	CD8_T	-0.027886	0.763378	0.875536	5037
THYM	PEBP1	CD8_naive	-0.143848	0.11858	0.251696	5037
THYM	PEBP1	Central_memory	0.042436	0.646778	0.811763	5037
THYM	PEBP1	Cytotoxic	-0.0160279	0.862644	0.944774	5037
THYM	PEBP1	DC	0.166792	0.0698313	0.200468	5037
THYM	PEBP1	Effector_memory	-0.0443127	0.632275	0.834692	5037
THYM	PEBP1	Exhausted	0.0650867	0.481892	0.567492	5037
THYM	PEBP1	Gamma_delta	-0.0399674	0.666059	0.858764	5037
THYM	PEBP1	InfiltrationScore	0.183272	0.046033	0.158964	5037
THYM	PEBP1	MAIT	-0.291403	0.00130281	0.0146851	5037
THYM	PEBP1	Macrophage	0.0815281	0.378076	0.554307	5037
THYM	PEBP1	Monocyte	0.102505	0.26729	0.442994	5037
THYM	PEBP1	NK	0.104998	0.255767	0.454265	5037
THYM	PEBP1	NKT	0.168406	0.0671307	0.115755	5037
THYM	PEBP1	Neutrophil	0.107133	0.246176	0.405028	5037
THYM	PEBP1	Tfh	-0.209141	0.0224492	0.0697824	5037
THYM	PEBP1	Th1	0.0443529	0.631966	0.842742	5037
THYM	PEBP1	Th17	-0.129443	0.160597	0.382292	5037
THYM	PEBP1	Th2	0.0943493	0.307423	0.592657	5037
THYM	PEBP1	Tr1	-0.0204395	0.825374	0.98203	5037
THYM	PEBP1	iTreg	0.116262	0.207974	0.525965	5037
THYM	PEBP1	nTreg	0.0925599	0.316729	0.533727	5037
THYM	YY1	Bcell	0.209586	0.0221577	0.0770964	7528
THYM	YY1	CD4_T	0.29155	0.00129513	0.0192993	7528
THYM	YY1	CD4_naive	0.274718	0.00249799	0.0288456	7528
THYM	YY1	CD8_T	0.167447	0.0687242	0.188743	7528
THYM	YY1	CD8_naive	0.453281	2.25986e-07	5.6785e-05	7528
THYM	YY1	Central_memory	0.244036	0.00748222	0.118345	7528
THYM	YY1	Cytotoxic	-0.100198	0.278263	0.696549	7528
THYM	YY1	DC	0.13394	0.146434	0.273854	7528
THYM	YY1	Effector_memory	-0.218816	0.0168093	0.197266	7528
THYM	YY1	Exhausted	0.141587	0.124543	0.226735	7528
THYM	YY1	Gamma_delta	-0.0279886	0.762533	0.890198	7528
THYM	YY1	InfiltrationScore	-0.395873	8.3375e-06	0.000421323	7528
THYM	YY1	MAIT	0.106291	0.24993	0.415532	7528
THYM	YY1	Macrophage	-0.343777	0.000129227	0.00550839	7528
THYM	YY1	Monocyte	-0.302183	0.000837552	0.00829661	7528
THYM	YY1	NK	-0.362933	4.9803e-05	0.00176177	7528
THYM	YY1	NKT	-0.444744	4.03365e-07	5.48058e-06	7528
THYM	YY1	Neutrophil	-0.25717	0.00475127	0.0263985	7528
THYM	YY1	Tfh	0.414418	2.79286e-06	3.5968e-05	7528
THYM	YY1	Th1	-0.0555491	0.548482	0.777011	7528
THYM	YY1	Th17	0.218346	0.0170516	0.151132	7528
THYM	YY1	Th2	-0.266375	0.00340889	0.0391692	7528
THYM	YY1	Tr1	0.0534101	0.564009	0.98203	7528
THYM	YY1	iTreg	-0.0858414	0.353278	0.647	7528
THYM	YY1	nTreg	-0.203728	0.0262625	0.107857	7528
UCEC	PEBP1	Bcell	0.0824366	0.276725	0.401925	5037
UCEC	PEBP1	CD4_T	0.06133	0.418746	0.948339	5037
UCEC	PEBP1	CD4_naive	0.0815831	0.281746	0.916403	5037
UCEC	PEBP1	CD8_T	0.175646	0.019713	0.420032	5037
UCEC	PEBP1	CD8_naive	-0.142985	0.058341	0.676134	5037
UCEC	PEBP1	Central_memory	0.0562776	0.458163	0.822198	5037
UCEC	PEBP1	Cytotoxic	0.143801	0.0569028	0.447317	5037
UCEC	PEBP1	DC	0.0056449	0.940728	0.995547	5037
UCEC	PEBP1	Effector_memory	0.122469	0.105393	0.349039	5037
UCEC	PEBP1	Exhausted	0.164374	0.0292585	0.168488	5037
UCEC	PEBP1	Gamma_delta	0.0449287	0.553785	0.9023	5037
UCEC	PEBP1	InfiltrationScore	0.127948	0.0905914	0.690339	5037
UCEC	PEBP1	MAIT	0.0541377	0.47546	0.99996	5037
UCEC	PEBP1	Macrophage	0.0402527	0.59582	0.887417	5037
UCEC	PEBP1	Monocyte	-0.136643	0.0705531	0.546355	5037
UCEC	PEBP1	NK	0.158836	0.0352415	0.668692	5037
UCEC	PEBP1	NKT	-0.0180157	0.812407	0.998197	5037
UCEC	PEBP1	Neutrophil	-0.0797606	0.29267	0.980721	5037
UCEC	PEBP1	Tfh	0.151727	0.0444101	0.442651	5037
UCEC	PEBP1	Th1	0.236125	0.0016052	0.058428	5037
UCEC	PEBP1	Th17	-0.220733	0.00324113	0.343429	5037
UCEC	PEBP1	Th2	0.0223104	0.768828	0.86928	5037
UCEC	PEBP1	Tr1	-0.058217	0.442794	0.999977	5037
UCEC	PEBP1	iTreg	0.0311177	0.681821	0.899449	5037
UCEC	PEBP1	nTreg	-0.0646165	0.394204	0.712379	5037
UCEC	YY1	Bcell	0.176746	0.0189455	0.0593298	7528
UCEC	YY1	CD4_T	-0.0687699	0.364455	0.94422	7528
UCEC	YY1	CD4_naive	0.124329	0.100168	0.916403	7528
UCEC	YY1	CD8_T	-0.0381962	0.614752	0.836275	7528
UCEC	YY1	CD8_naive	-0.028118	0.711053	0.948925	7528
UCEC	YY1	Central_memory	-0.0236628	0.755246	0.960143	7528
UCEC	YY1	Cytotoxic	-0.0907973	0.230739	0.67615	7528
UCEC	YY1	DC	-0.0812697	0.283605	0.850778	7528
UCEC	YY1	Effector_memory	0.0193786	0.798509	0.914171	7528
UCEC	YY1	Exhausted	-0.0512589	0.499279	0.715613	7528
UCEC	YY1	Gamma_delta	-0.0610667	0.42075	0.853199	7528
UCEC	YY1	InfiltrationScore	-0.104698	0.166703	0.746265	7528
UCEC	YY1	MAIT	0.0730725	0.335147	0.99996	7528
UCEC	YY1	Macrophage	-0.124626	0.0993535	0.618151	7528
UCEC	YY1	Monocyte	-0.0323978	0.669485	0.90529	7528
UCEC	YY1	NK	-0.0695798	0.35882	0.975101	7528
UCEC	YY1	NKT	-0.0160492	0.832565	0.998197	7528
UCEC	YY1	Neutrophil	0.0211208	0.780833	0.999131	7528
UCEC	YY1	Tfh	0.0159797	0.833279	0.950345	7528
UCEC	YY1	Th1	0.0341991	0.652277	0.842435	7528
UCEC	YY1	Th17	-0.0706226	0.351645	0.784027	7528
UCEC	YY1	Th2	-0.0302986	0.689758	0.815399	7528
UCEC	YY1	Tr1	0.0351855	0.64293	0.999977	7528
UCEC	YY1	iTreg	0.0376656	0.619679	0.884076	7528
UCEC	YY1	nTreg	0.0692014	0.361446	0.70306	7528
UCS	PEBP1	Bcell	-0.149273	0.272193	0.962063	5037
UCS	PEBP1	CD4_T	0.041787	0.759768	0.957784	5037
UCS	PEBP1	CD4_naive	-0.221085	0.101534	0.575769	5037
UCS	PEBP1	CD8_T	0.0532073	0.696934	0.999917	5037
UCS	PEBP1	CD8_naive	-0.10321	0.449074	0.820336	5037
UCS	PEBP1	Central_memory	-0.0238693	0.86138	0.965965	5037
UCS	PEBP1	Cytotoxic	0.11661	0.392067	0.999834	5037
UCS	PEBP1	DC	0.0269009	0.843981	0.979471	5037
UCS	PEBP1	Effector_memory	-0.168706	0.21389	0.843383	5037
UCS	PEBP1	Exhausted	-0.0234107	0.864018	0.987757	5037
UCS	PEBP1	Gamma_delta	0.153143	0.259813	0.999066	5037
UCS	PEBP1	InfiltrationScore	0.0450825	0.741457	0.921063	5037
UCS	PEBP1	MAIT	0.0476874	0.727082	0.943095	5037
UCS	PEBP1	Macrophage	0.089517	0.511763	0.835123	5037
UCS	PEBP1	Monocyte	-0.113358	0.405496	0.898152	5037
UCS	PEBP1	NK	0.0986207	0.4696	0.82386	5037
UCS	PEBP1	NKT	0.176544	0.193057	0.948107	5037
UCS	PEBP1	Neutrophil	-0.0780489	0.567482	0.978698	5037
UCS	PEBP1	Tfh	0.0470315	0.730693	0.999112	5037
UCS	PEBP1	Th1	-0.0531211	0.697401	0.989136	5037
UCS	PEBP1	Th17	-0.14859	0.274417	0.911805	5037
UCS	PEBP1	Th2	0.169452	0.211842	0.966302	5037
UCS	PEBP1	Tr1	0.125395	0.35713	0.998991	5037
UCS	PEBP1	iTreg	-0.0570169	0.676392	0.986779	5037
UCS	PEBP1	nTreg	-0.0521142	0.702869	0.997527	5037
UCS	YY1	Bcell	0.0332496	0.807794	0.998848	7528
UCS	YY1	CD4_T	-0.14035	0.302208	0.833017	7528
UCS	YY1	CD4_naive	0.0500569	0.714087	0.978452	7528
UCS	YY1	CD8_T	0.0211599	0.876985	0.999917	7528
UCS	YY1	CD8_naive	-0.0837065	0.539643	0.83997	7528
UCS	YY1	Central_memory	-0.0394826	0.772651	0.950702	7528
UCS	YY1	Cytotoxic	-0.0315075	0.817688	0.999834	7528
UCS	YY1	DC	0.0291569	0.831082	0.978432	7528
UCS	YY1	Effector_memory	0.115771	0.395506	0.921503	7528
UCS	YY1	Exhausted	0.0903726	0.507721	0.894804	7528
UCS	YY1	Gamma_delta	-0.058443	0.668761	0.999066	7528
UCS	YY1	InfiltrationScore	-0.0556439	0.68377	0.907586	7528
UCS	YY1	MAIT	0.0380816	0.780513	0.953384	7528
UCS	YY1	Macrophage	0.0259938	0.84918	0.952886	7528
UCS	YY1	Monocyte	0.00162379	0.990524	0.99751	7528
UCS	YY1	NK	-0.0640436	0.639119	0.875137	7528
UCS	YY1	NKT	0.108437	0.426315	0.975116	7528
UCS	YY1	Neutrophil	-0.15302	0.2602	0.978698	7528
UCS	YY1	Tfh	0.0476296	0.7274	0.999112	7528
UCS	YY1	Th1	0.132555	0.330115	0.974595	7528
UCS	YY1	Th17	0.33531	0.0115291	0.575067	7528
UCS	YY1	Th2	-0.119172	0.381676	0.966302	7528
UCS	YY1	Tr1	-0.0182809	0.893618	0.998991	7528
UCS	YY1	iTreg	-0.165547	0.222717	0.862811	7528
UCS	YY1	nTreg	-0.0934396	0.493364	0.997527	7528
UVM	PEBP1	Bcell	-0.136349	0.227822	0.499765	5037
UVM	PEBP1	CD4_T	-0.0920435	0.416774	0.904985	5037
UVM	PEBP1	CD4_naive	-0.132888	0.239954	0.917313	5037
UVM	PEBP1	CD8_T	0.171566	0.128087	0.2648	5037
UVM	PEBP1	CD8_naive	0.103985	0.358657	0.754611	5037
UVM	PEBP1	Central_memory	0.0485698	0.66877	0.759831	5037
UVM	PEBP1	Cytotoxic	0.14564	0.197389	0.519219	5037
UVM	PEBP1	DC	0.126263	0.264411	0.997952	5037
UVM	PEBP1	Effector_memory	0.24565	0.0280668	0.0761239	5037
UVM	PEBP1	Exhausted	0.189034	0.0930859	0.345931	5037
UVM	PEBP1	Gamma_delta	0.20024	0.0749296	0.187121	5037
UVM	PEBP1	InfiltrationScore	0.0201806	0.858976	0.999386	5037
UVM	PEBP1	MAIT	0.0993035	0.38082	0.576031	5037
UVM	PEBP1	Macrophage	-0.102702	0.364651	0.974391	5037
UVM	PEBP1	Monocyte	-0.142156	0.208438	0.923339	5037
UVM	PEBP1	NK	-0.0264662	0.815733	0.999053	5037
UVM	PEBP1	NKT	-0.130036	0.250283	0.560248	5037
UVM	PEBP1	Neutrophil	-0.172431	0.126147	0.248173	5037
UVM	PEBP1	Tfh	0.0806049	0.477231	0.762372	5037
UVM	PEBP1	Th1	0.17242	0.126171	0.258356	5037
UVM	PEBP1	Th17	-0.0760528	0.502537	0.762639	5037
UVM	PEBP1	Th2	0.0623974	0.582421	0.803543	5037
UVM	PEBP1	Tr1	0.0907303	0.423481	0.77589	5037
UVM	PEBP1	iTreg	0.00478657	0.966388	0.980173	5037
UVM	PEBP1	nTreg	0.0277354	0.807064	0.869019	5037
UVM	YY1	Bcell	-0.181409	0.107305	0.367969	7528
UVM	YY1	CD4_T	0.10518	0.353133	0.872832	7528
UVM	YY1	CD4_naive	-0.116892	0.301788	0.954834	7528
UVM	YY1	CD8_T	0.0941522	0.406134	0.555916	7528
UVM	YY1	CD8_naive	-0.0075417	0.947064	0.978853	7528
UVM	YY1	Central_memory	-0.0732754	0.518312	0.633485	7528
UVM	YY1	Cytotoxic	0.0597068	0.598819	0.777168	7528
UVM	YY1	DC	0.256221	0.0217859	0.422032	7528
UVM	YY1	Effector_memory	0.161954	0.151215	0.250436	7528
UVM	YY1	Exhausted	0.17627	0.117803	0.388698	7528
UVM	YY1	Gamma_delta	-0.161059	0.153516	0.294625	7528
UVM	YY1	InfiltrationScore	0.152563	0.176693	0.999386	7528
UVM	YY1	MAIT	0.244568	0.0287881	0.154673	7528
UVM	YY1	Macrophage	0.209533	0.0621266	0.477088	7528
UVM	YY1	Monocyte	0.0670104	0.554794	0.923339	7528
UVM	YY1	NK	0.0587076	0.604961	0.999053	7528
UVM	YY1	NKT	-0.201422	0.0731927	0.491621	7528
UVM	YY1	Neutrophil	-0.239368	0.0324783	0.0900231	7528
UVM	YY1	Tfh	0.0994132	0.380291	0.666674	7528
UVM	YY1	Th1	0.222306	0.0474848	0.159504	7528
UVM	YY1	Th17	-0.114232	0.313	0.614356	7528
UVM	YY1	Th2	-0.00215847	0.984839	0.992516	7528
UVM	YY1	Tr1	0.274253	0.0138246	0.415079	7528
UVM	YY1	iTreg	0.149863	0.184566	0.507347	7528
UVM	YY1	nTreg	0.222817	0.0469646	0.210099	7528
