# Supplementary figures and images for: Cross-Talks between RKIP and YY1 through a Multilevel Bioinformatics Pan-Cancer Analysis
Source: Preprints.org preprint supplement (doi:10.20944/preprints202309.0467.v1), 2023-09-07

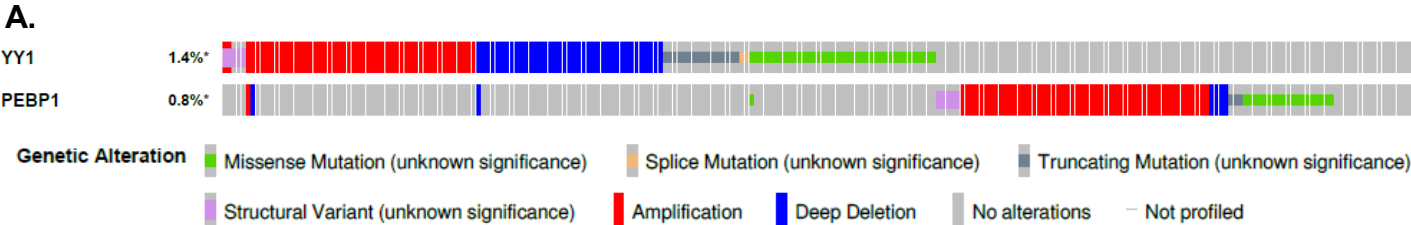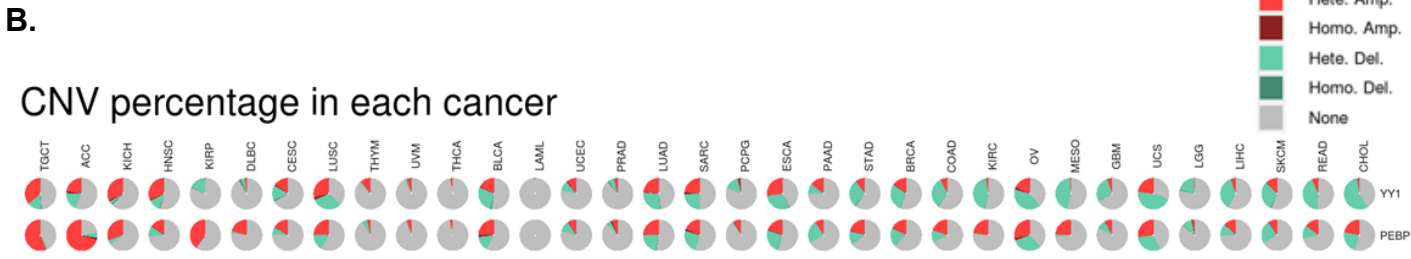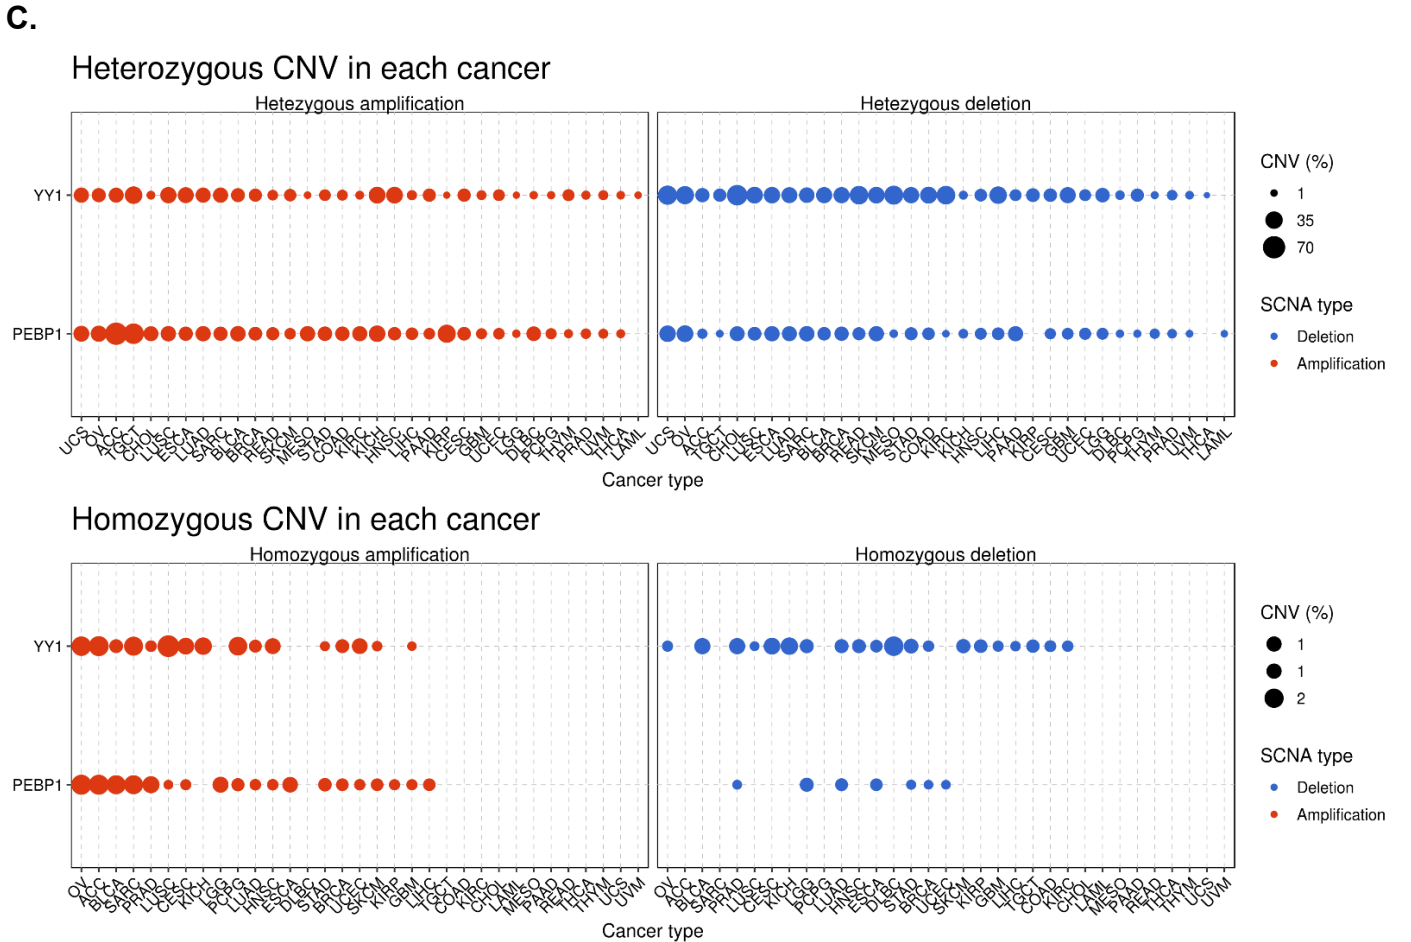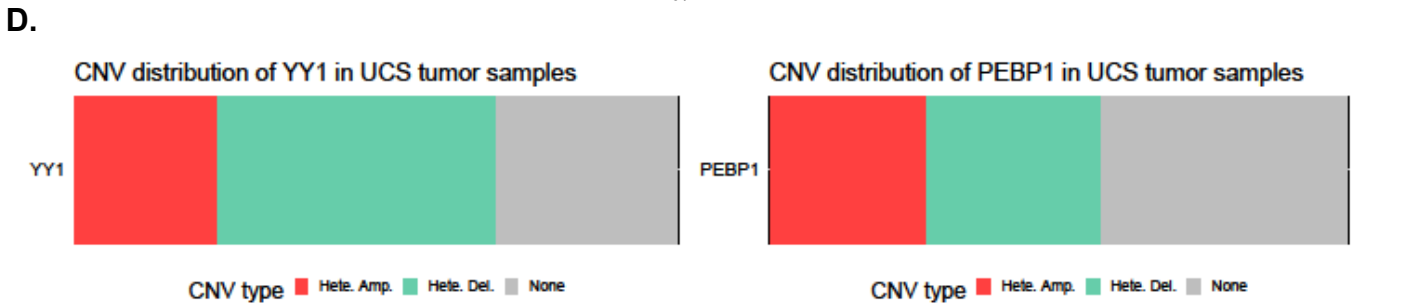

Figure S4

Supplement: Supplementary file 1 [file supplementary]

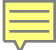

YY1

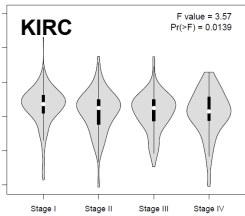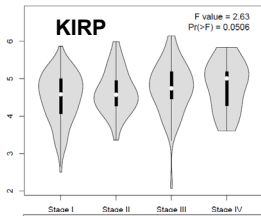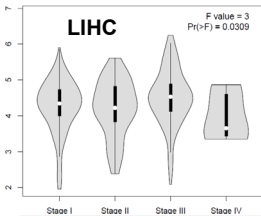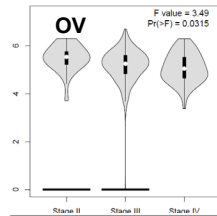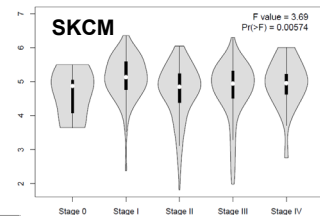

PEBP1

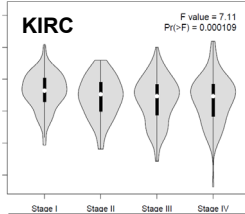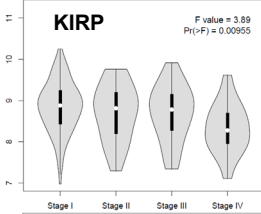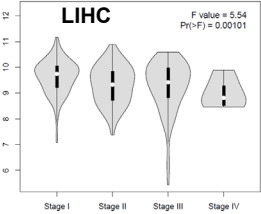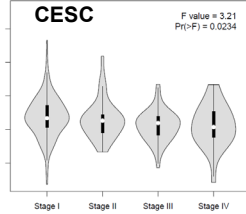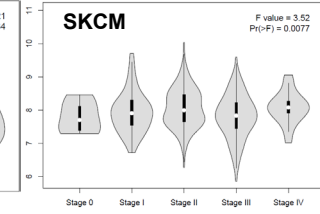

PEBP1

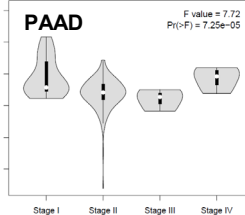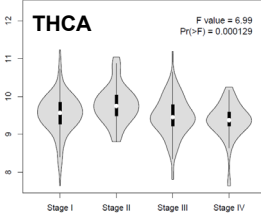

Supplement: Supplementary file 2 [file supplementary]

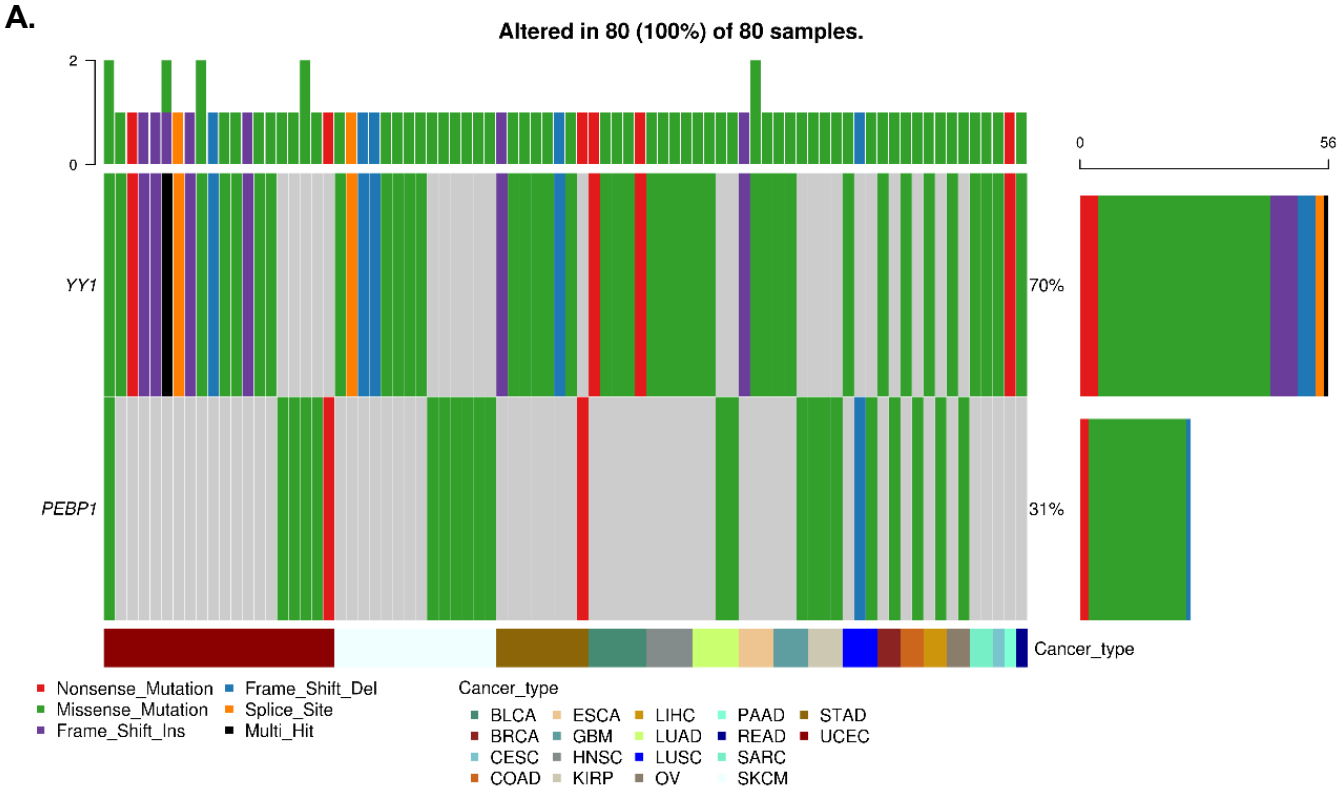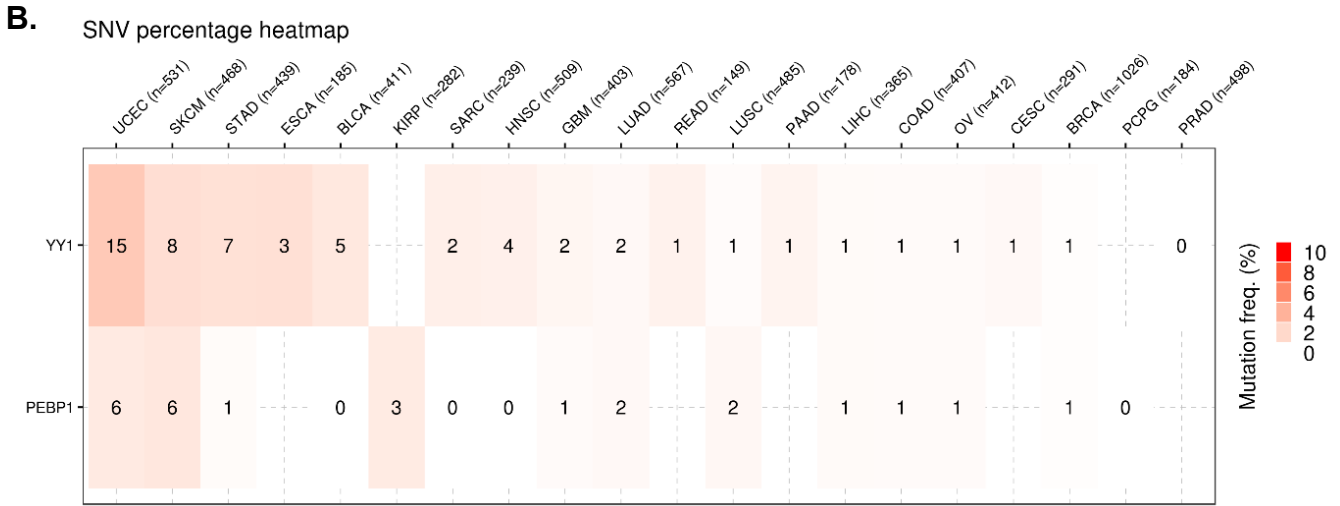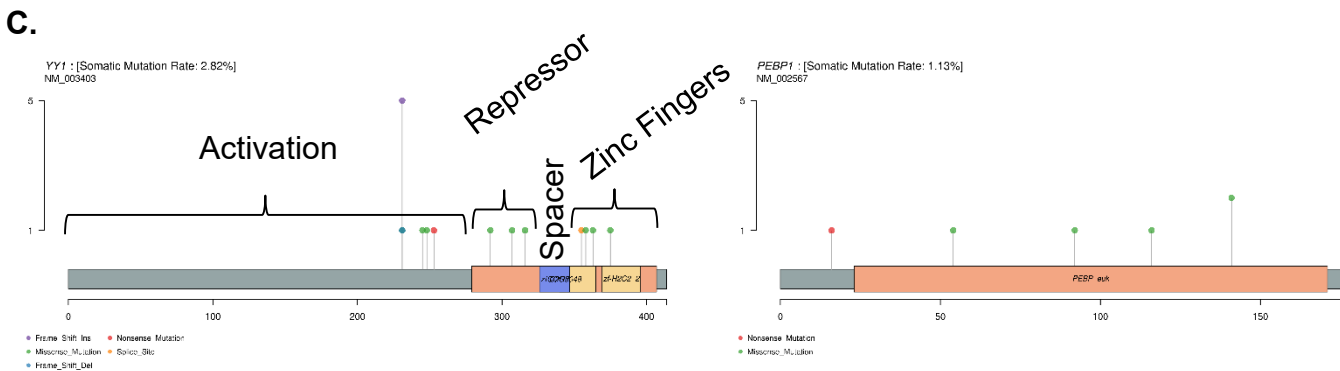

**Figure S3**

Supplement: Supplementary file 3 [file supplementary]

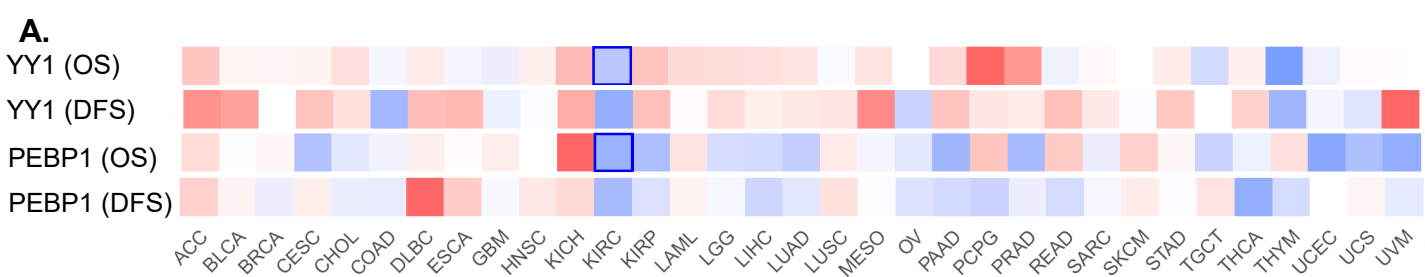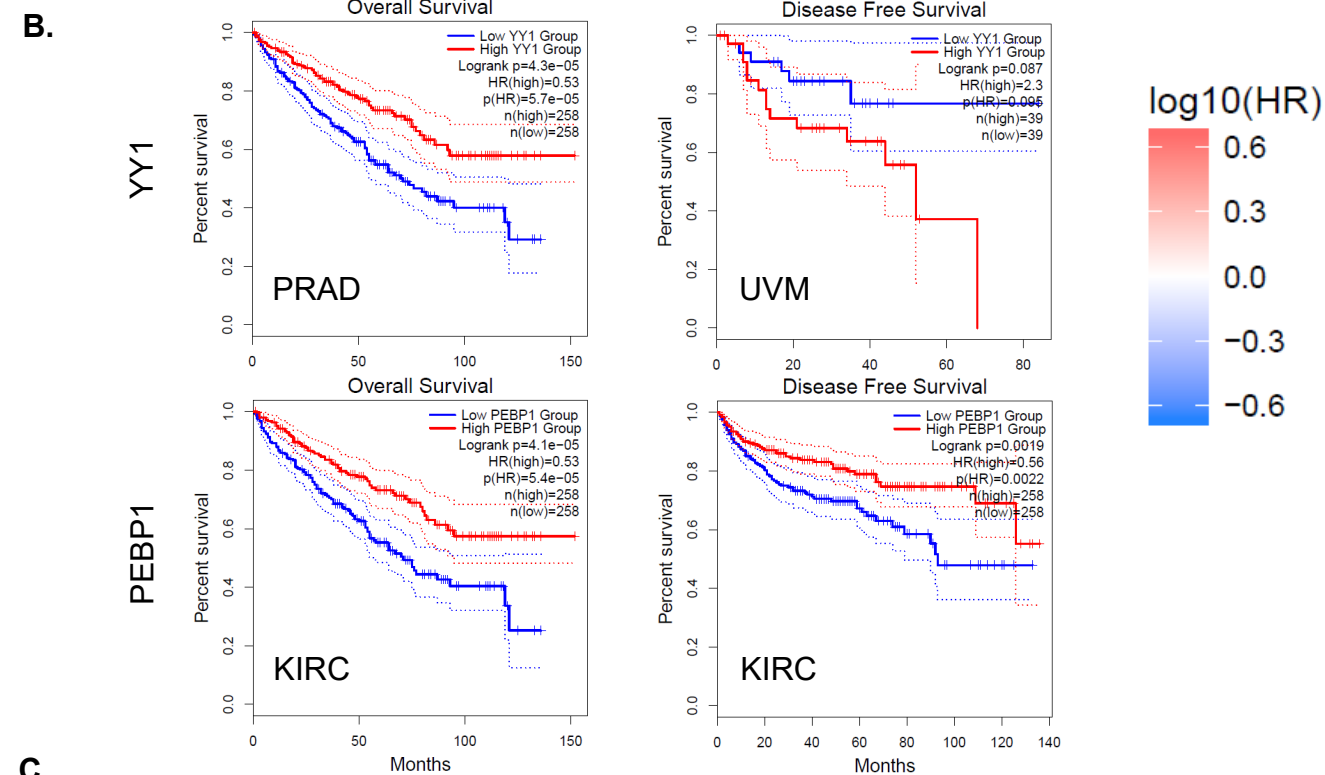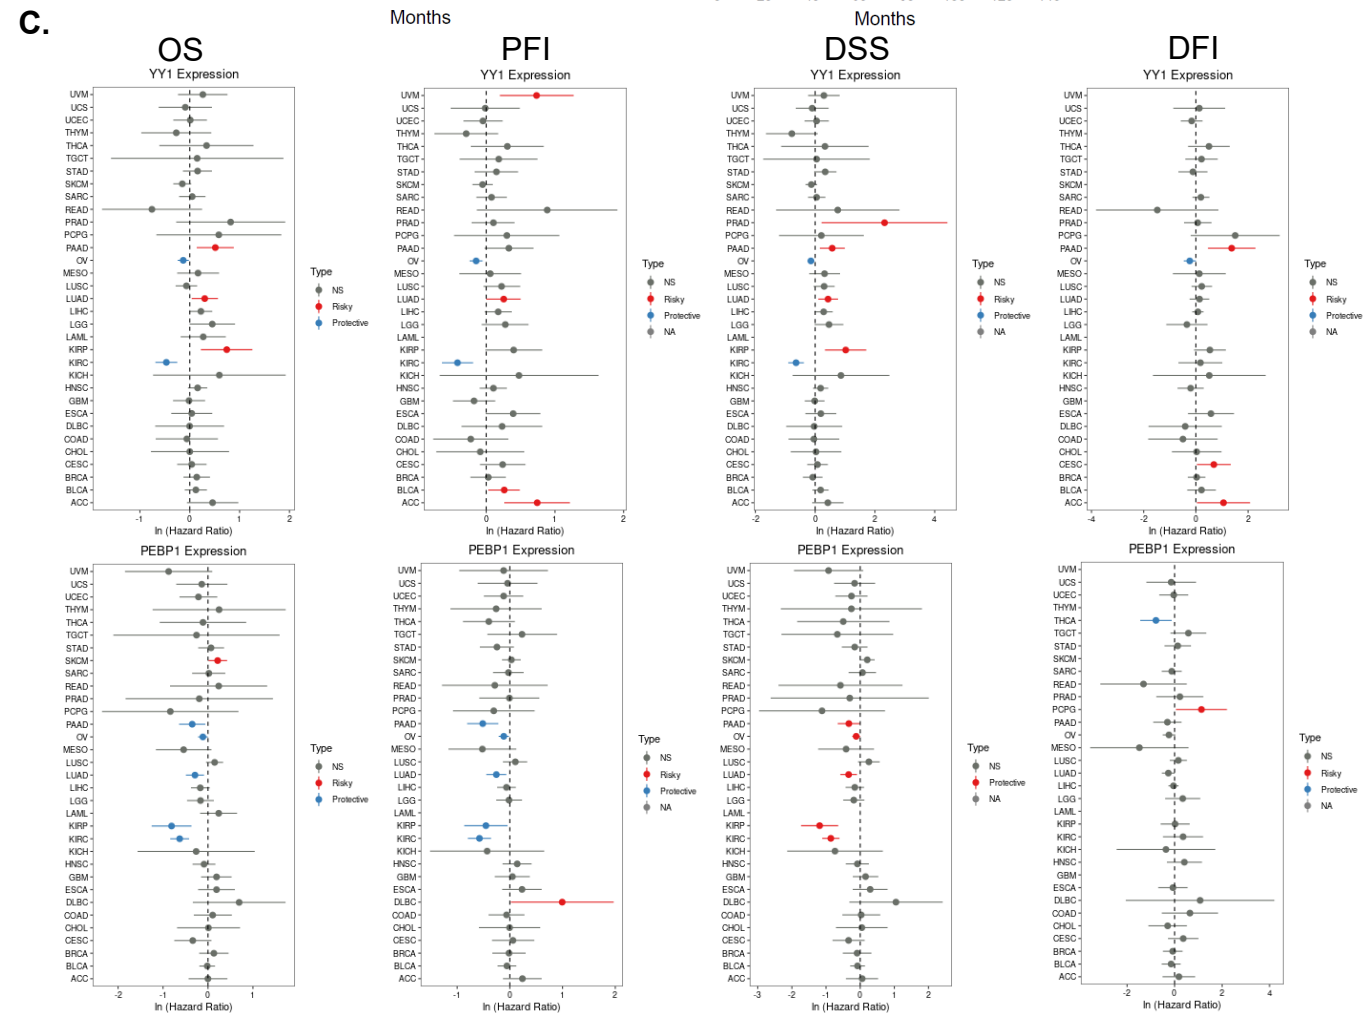

Supplement: Supplementary file 4 [file supplementary]
